# Supplementary material for: Genome-wide investigation of the clinical significance and prospective molecular mechanisms of kinesin family member genes in patients with lung adenocarcinoma
Source: PubMed Central journal article supplement — Oncol Rep. 2019 Jul 16;42(3):1017–34. doi: 10.3892/or.2019.7236 (PMC6667890; doi:10.3892/or.2019.7236), 2019-07-16
Supplement: Supplementary_Data.pdf [file Supplementary_Data.pdf]

**Table S1. Co-expression analysis results of KIF family genes in LUAD tumor tissues.**

| ID     | KIF11  | KIF12  | KIF13A | KIF13B | KIF14  | KIF15  | KIF16B | KIF17  | KIF18A | KIF18B | KIF19  | KIF1A  | KIF1B  | KIF1BP | KIF1C  | KIF20A | KIF20B | KIF21A | KIF21B | KIF22  | KIF23  | KIF24  | KIF25  | KIF26A | KIF26B | KIF27  | KIF2A  | KIF2C  | KIF3A  | KIF3B  | KIF3C  | KIF4A  | KIF4B  | KIF5A  | KIF5B  | KIF5C  | KIF6   | KIF7   | KIF9   | KIFAP3 | KIFC1  | KIFC2  | KIFC3  |
|--------|--------|--------|--------|--------|--------|--------|--------|--------|--------|--------|--------|--------|--------|--------|--------|--------|--------|--------|--------|--------|--------|--------|--------|--------|--------|--------|--------|--------|--------|--------|--------|--------|--------|--------|--------|--------|--------|--------|--------|--------|--------|--------|--------|
| KIF11  | 1.000  | -0.221 | -0.196 | -0.089 | 0.861  | 0.797  | -0.173 | -0.031 | 0.724  | 0.755  | 0.068  | 0.316  | 0.328  | 0.325  | -0.256 | 0.779  | 0.865  | 0.365  | 0.079  | 0.406  | 0.765  | 0.547  | -0.032 | 0.130  | 0.000  | -0.081 | 0.429  | 0.785  | 0.026  | 0.317  | 0.330  | 0.846  | 0.419  | 0.191  | 0.418  | 0.268  | -0.192 | 0.190  | -0.212 | -0.032 | 0.757  | -0.049 | -0.137 |
| KIF12  | -0.221 | 1.000  | -0.033 | 0.133  | -0.194 | -0.196 | 0.085  | -0.081 | -0.220 | -0.136 | 0.094  | -0.115 | -0.156 | -0.059 | 0.109  | -0.201 | -0.235 | 0.047  | 0.145  | -0.073 | -0.196 | -0.165 | 0.109  | 0.004  | 0.058  | -0.049 | -0.190 | -0.219 | 0.126  | -0.005 | -0.134 | -0.223 | -0.161 | -0.035 | -0.136 | 0.007  | 0.071  | -0.087 | 0.126  | -0.080 | -0.152 | 0.192  | 0.215  |
| KIF13A | -0.196 | -0.033 | 1.000  | 0.085  | -0.173 | -0.221 | 0.287  | 0.018  | -0.078 | -0.282 | -0.081 | -0.106 | 0.267  | 0.028  | 0.277  | -0.234 | -0.059 | -0.056 | -0.069 | -0.279 | -0.250 | -0.113 | -0.126 | -0.079 | 0.009  | 0.248  | 0.059  | -0.264 | 0.050  | -0.030 | -0.171 | -0.222 | 0.012  | -0.051 | 0.054  | -0.194 | 0.123  | 0.075  | 0.005  | 0.178  | -0.251 | -0.181 | 0.026  |
| KIF13B | -0.089 | 0.133  | 0.085  | 1.000  | -0.064 | -0.157 | 0.186  | -0.025 | -0.148 | -0.144 | 0.029  | 0.010  | 0.085  | 0.066  | 0.312  | -0.179 | -0.069 | 0.220  | 0.141  | -0.255 | -0.103 | -0.052 | -0.148 | 0.000  | 0.027  | 0.117  | -0.054 | -0.177 | 0.024  | 0.294  | -0.065 | -0.122 | -0.079 | -0.152 | 0.225  | -0.036 | -0.008 | -0.137 | 0.143  | -0.157 | -0.139 | -0.109 | 0.053  |
| KIF14  | 0.861  | -0.194 | -0.173 | -0.064 | 1.000  | 0.757  | -0.121 | -0.003 | 0.726  | 0.713  | 0.010  | 0.342  | 0.371  | 0.234  | -0.205 | 0.760  | 0.750  | 0.421  | 0.148  | 0.377  | 0.712  | 0.563  | -0.029 | 0.090  | 0.062  | -0.041 | 0.390  | 0.786  | 0.090  | 0.314  | 0.327  | 0.795  | 0.406  | 0.152  | 0.447  | 0.344  | -0.215 | 0.245  | -0.209 | 0.006  | 0.732  | -0.008 | -0.037 |
| KIF15  | 0.797  | -0.196 | -0.221 | -0.157 | 0.757  | 1.000  | -0.156 | -0.007 | 0.668  | 0.717  | 0.134  | 0.327  | 0.380  | 0.122  | -0.237 | 0.765  | 0.637  | 0.229  | 0.081  | 0.488  | 0.644  | 0.577  | -0.028 | 0.229  | -0.051 | -0.030 | 0.433  | 0.809  | 0.059  | 0.242  | 0.303  | 0.782  | 0.393  | 0.255  | 0.353  | 0.389  | -0.207 | 0.249  | -0.116 | -0.001 | 0.794  | 0.036  | -0.191 |
| KIF16B | -0.173 | 0.085  | 0.287  | 0.186  | -0.121 | -0.156 | 1.000  | -0.096 | -0.171 | -0.225 | -0.038 | -0.096 | 0.183  | 0.048  | 0.184  | -0.209 | -0.102 | 0.138  | -0.037 | -0.242 | -0.169 | -0.067 | -0.080 | -0.047 | 0.090  | 0.220  | 0.065  | -0.188 | 0.165  | 0.092  | -0.091 | -0.220 | -0.090 | -0.021 | 0.163  | -0.040 | 0.017  | -0.016 | 0.023  | 0.264  | -0.163 | -0.127 | -0.040 |
| KIF17  | -0.031 | -0.081 | 0.018  | -0.025 | -0.003 | -0.007 | -0.096 | 1.000  | 0.016  | -0.065 | 0.269  | -0.001 | 0.076  | -0.109 | 0.124  | -0.035 | -0.096 | -0.003 | 0.091  | -0.087 | -0.028 | 0.211  | -0.044 | 0.084  | -0.154 | 0.170  | 0.014  | 0.007  | 0.125  | 0.036  | -0.015 | -0.078 | -0.013 | 0.022  | -0.056 | 0.098  | 0.361  | 0.172  | 0.237  | -0.028 | -0.002 | -0.140 | -0.017 |
| KIF18A | 0.724  | -0.220 | -0.078 | -0.148 | 0.726  | 0.668  | -0.171 | 0.016  | 1.000  | 0.549  | 0.002  | 0.335  | 0.260  | 0.186  | -0.246 | 0.663  | 0.648  | 0.304  | -0.047 | 0.326  | 0.629  | 0.480  | -0.096 | 0.091  | -0.099 | -0.018 | 0.400  | 0.657  | 0.023  | 0.197  | 0.211  | 0.693  | 0.426  | 0.069  | 0.307  | 0.282  | -0.171 | 0.149  | -0.146 | 0.022  | 0.648  | -0.076 | -0.129 |
| KIF18B | 0.755  | -0.136 | -0.282 | -0.144 | 0.713  | 0.717  | -0.225 | -0.065 | 0.549  | 1.000  | 0.096  | 0.374  | 0.198  | 0.106  | -0.274 | 0.722  | 0.566  | 0.229  | 0.151  | 0.523  | 0.635  | 0.512  | 0.074  | 0.168  | -0.045 | -0.144 | 0.266  | 0.788  | -0.062 | 0.226  | 0.367  | 0.790  | 0.313  | 0.172  | 0.207  | 0.255  | -0.196 | 0.272  | -0.240 | -0.116 | 0.799  | 0.199  | -0.001 |
| KIF19  | 0.068  | 0.094  | -0.081 | 0.029  | 0.010  | 0.134  | -0.038 | 0.269  | 0.002  | 0.096  | 1.000  | 0.056  | -0.015 | 0.027  | 0.010  | 0.069  | -0.009 | 0.161  | 0.047  | 0.088  | -0.003 | 0.285  | -0.019 | 0.331  | 0.113  | 0.275  | 0.082  | 0.034  | 0.278  | 0.213  | 0.071  | 0.030  | -0.075 | 0.047  | 0.024  | 0.106  | 0.390  | -0.025 | 0.315  | 0.011  | 0.150  | 0.011  | 0.041  |
| KIF1A  | 0.316  | -0.115 | -0.106 | 0.010  | 0.342  | 0.327  | -0.096 | -0.001 | 0.335  | 0.374  | 0.056  | 1.000  | 0.231  | 0.078  | -0.153 | 0.193  | 0.168  | 0.265  | 0.097  | 0.238  | 0.237  | 0.244  | 0.041  | 0.099  | 0.085  | -0.068 | 0.111  | 0.336  | 0.027  | 0.194  | 0.351  | 0.357  | 0.226  | 0.144  | 0.166  | 0.354  | -0.065 | 0.132  | -0.132 | -0.041 | 0.345  | 0.059  | -0.022 |
| KIF1B  | 0.328  | -0.156 | 0.267  | 0.085  | 0.371  | 0.380  | 0.183  | 0.076  | 0.260  | 0.198  | -0.015 | 0.231  | 1.000  | 0.234  | 0.093  | 0.246  | 0.274  | 0.248  | 0.112  | 0.007  | 0.214  | 0.302  | -0.094 | 0.070  | 0.098  | 0.178  | 0.370  | 0.303  | 0.312  | 0.359  | 0.149  | 0.266  | 0.188  | 0.181  | 0.435  | 0.308  | -0.063 | 0.214  | -0.059 | 0.120  | 0.266  | -0.087 | -0.096 |
| KIF1BP | 0.325  | -0.059 | 0.028  | 0.066  | 0.234  | 0.122  | 0.048  | -0.109 | 0.186  | 0.106  | 0.027  | 0.078  | 0.234  | 1.000  | 0.079  | 0.137  | 0.338  | 0.234  | -0.057 | -0.050 | 0.203  | 0.108  | -0.076 | -0.010 | 0.147  | -0.065 | 0.169  | 0.142  | 0.143  | 0.238  | 0.126  | 0.199  | 0.128  | 0.031  | 0.366  | 0.064  | -0.022 | -0.080 | -0.060 | 0.066  | 0.148  | -0.088 | -0.022 |
| KIF1C  | -0.256 | 0.109  | 0.277  | 0.312  | -0.205 | -0.237 | 0.184  | 0.124  | -0.246 | -0.274 | 0.010  | -0.153 | 0.093  | 0.079  | 1.000  | -0.265 | -0.199 | 0.025  | 0.050  | -0.219 | -0.233 | -0.106 | -0.113 | 0.042  | -0.053 | 0.008  | -0.198 | -0.240 | 0.100  | 0.071  | -0.143 | -0.294 | -0.127 | -0.122 | 0.048  | -0.075 | 0.166  | 0.023  | 0.234  | 0.019  | -0.198 | -0.011 | 0.162  |
| KIF20A | 0.779  | -0.201 | -0.234 | -0.179 | 0.760  | 0.765  | -0.209 | -0.035 | 0.663  | 0.722  | 0.069  | 0.193  | 0.246  | 0.137  | -0.265 | 1.000  | 0.608  | 0.175  | 0.074  | 0.501  | 0.688  | 0.510  | -0.018 | 0.194  | -0.028 | -0.123 | 0.332  | 0.796  | 0.048  | 0.182  | 0.283  | 0.770  | 0.329  | 0.114  | 0.271  | 0.285  | -0.192 | 0.194  | -0.174 | -0.038 | 0.804  | 0.041  | -0.156 |
| KIF20B | 0.865  | -0.235 | -0.059 | -0.069 | 0.750  | 0.637  | -0.102 | -0.096 | 0.648  | 0.566  | -0.009 | 0.168  | 0.274  | 0.338  | -0.199 | 0.608  | 1.000  | 0.371  | 0.013  | 0.211  | 0.655  | 0.433  | -0.081 | 0.077  | 0.016  | 0.025  | 0.485  | 0.606  | 0.019  | 0.262  | 0.238  | 0.730  | 0.410  | 0.160  | 0.418  | 0.096  | -0.188 | 0.051  | -0.223 | 0.004  | 0.549  | -0.086 | -0.103 |
| KIF21A | 0.365  | 0.047  | -0.056 | 0.220  | 0.421  | 0.229  | 0.138  | -0.003 | 0.304  | 0.229  | 0.161  | 0.265  | 0.248  | 0.234  | 0.025  | 0.175  | 0.371  | 1.000  | 0.012  | 0.016  | 0.291  | 0.293  | -0.096 | 0.020  | 0.055  | 0.227  | 0.295  | 0.228  | 0.295  | 0.359  | 0.111  | 0.299  | 0.159  | 0.015  | 0.392  | 0.188  | 0.141  | -0.065 | 0.078  | -0.045 | 0.211  | -0.092 | 0.032  |
| KIF21B | 0.079  | 0.145  | -0.069 | 0.141  | 0.148  | 0.081  | -0.037 | 0.091  | -0.047 | 0.151  | 0.047  | 0.097  | 0.112  | -0.057 | 0.050  | 0.074  | 0.013  | 0.012  | 1.000  | -0.024 | -0.042 | 0.087  | 0.039  | 0.141  | 0.113  | -0.015 | 0.106  | 0.037  | 0.120  | 0.061  | 0.069  | 0.045  | -0.014 | 0.107  | -0.003 | 0.132  | -0.048 | 0.082  | -0.126 | -0.085 | 0.071  | 0.133  | 0.046  |
| KIF22  | 0.406  | -0.073 | -0.279 | -0.255 | 0.377  | 0.488  | -0.242 | -0.087 | 0.326  | 0.523  | 0.088  | 0.238  | 0.007  | -0.050 | -0.219 | 0.501  | 0.211  | 0.016  | -0.024 | 1.000  | 0.398  | 0.343  | 0.202  | 0.128  | -0.192 | -0.115 | -0.058 | 0.535  | -0.122 | -0.015 | 0.198  | 0.431  | 0.183  | 0.130  | 0.013  | 0.220  | -0.096 | 0.191  | -0.026 | -0.109 | 0.560  | 0.274  | 0.034  |
| KIF23  | 0.765  | -0.196 | -0.250 | -0.103 | 0.712  | 0.644  | -0.169 | -0.028 | 0.629  | 0.635  | -0.003 | 0.237  | 0.214  | 0.203  | -0.233 | 0.688  | 0.655  | 0.291  | -0.042 | 0.398  | 1.000  | 0.454  | -0.012 | 0.037  | -0.064 | -0.070 | 0.261  | 0.722  | -0.038 | 0.242  | 0.267  | 0.729  | 0.327  | 0.074  | 0.345  | 0.264  | -0.202 | 0.241  | -0.149 | -0.119 | 0.680  | -0.021 | -0.085 |
| KIF24  | 0.547  | -0.165 | -0.113 | -0.052 | 0.563  | 0.577  | -0.067 | 0.211  | 0.480  | 0.512  | 0.285  | 0.244  | 0.302  | 0.108  | -0.106 | 0.510  | 0.433  | 0.293  | 0.087  | 0.343  | 0.454  | 1.000  | -0.042 | 0.060  | -0.057 | 0.364  | 0.339  | 0.523  | 0.251  | 0.312  | 0.153  | 0.509  | 0.256  | 0.123  | 0.285  | 0.276  | 0.214  | 0.251  | 0.151  | -0.008 | 0.526  | 0.044  | -0.138 |
| KIF25  | -0.032 | 0.109  | -0.126 | -0.148 | -0.029 | -0.028 | -0.080 | -0.044 | -0.096 | 0.074  | -0.019 | 0.041  | -0.094 | -0.076 | -0.113 | -0.018 | -0.081 | -0.096 | 0.039  | 0.202  | -0.012 | -0.042 | 1.000  | -0.052 | 0.000  | -0.072 | -0.139 | -0.007 | -0.024 | -0.087 | 0.064  | 0.026  | 0.054  | 0.040  | -0.118 | 0.084  | -0.045 | 0.058  | -0.111 | -0.052 | -0.003 | 0.168  | 0.169  |
| KIF26A | 0.130  | 0.004  | -0.079 | 0.000  | 0.090  | 0.229  | -0.047 | 0.084  | 0.091  | 0.168  | 0.331  | 0.099  | 0.070  | -0.010 | 0.042  | 0.194  | 0.077  | 0.020  | 0.141  | 0.128  | 0.037  | 0.060  | -0.052 | 1.000  | 0.103  | -0.011 | 0.089  | 0.136  | 0.129  | 0.083  | 0.100  | 0.091  | 0.037  | 0.111  | 0.008  | 0.169  | 0.163  | 0.054  | -0.029 | 0.050  | 0.274  | 0.030  | -0.033 |
| KIF26B | 0.000  | 0.058  | 0.009  | 0.027  | 0.062  | -0.051 | 0.090  | -0.154 | -0.099 | -0.045 | 0.1    |        |        |        |        |        |        |        |        |        |        |        |        |        |        |        |        |        |        |        |        |        |        |        |        |        |        |        |        |        |        |        |        |

**Table SII. GSEA results of c5 reference gene set of high *KIF14* expression group.**

| Name                                                               | Size | ES       | NES      | NOM<br>P-value | FDR<br>q-value |
|--------------------------------------------------------------------|------|----------|----------|----------------|----------------|
| GO MITOTIC NUCLEAR DIVISION                                        | 337  | 0.712098 | 2.682246 | <0.0001        | <0.0001        |
| GO ORGANELLE FISSION                                               | 449  | 0.675969 | 2.667881 | <0.0001        | <0.0001        |
| GO SPINDLE MICROTUBULE                                             | 56   | 0.783062 | 2.663053 | <0.0001        | <0.0001        |
| GO REGULATION OF MICROTUBULE<br>POLYMERIZATION OR DEPOLYMERIZATION | 164  | 0.66438  | 2.650518 | <0.0001        | <0.0001        |
| GO CHROMOSOME SEGREGATION                                          | 247  | 0.752335 | 2.645015 | <0.0001        | <0.0001        |
| GO CELL DIVISION                                                   | 423  | 0.656167 | 2.634596 | <0.0001        | <0.0001        |
| GO SPINDLE                                                         | 267  | 0.647816 | 2.632039 | <0.0001        | <0.0001        |
| GO MITOTIC SISTER CHROMATID<br>SEGREGATION                         | 88   | 0.82701  | 2.629891 | <0.0001        | <0.0001        |
| GO NUCLEAR CHROMOSOME SEGREGATION                                  | 204  | 0.773826 | 2.619981 | <0.0001        | <0.0001        |
| GO CONDENSED CHROMOSOME                                            | 169  | 0.763499 | 2.596428 | <0.0001        | <0.0001        |
| GO SISTER CHROMATID SEGREGATION                                    | 163  | 0.801452 | 2.591617 | <0.0001        | <0.0001        |
| GO REGULATION OF MICROTUBULE BASED<br>PROCESS                      | 226  | 0.628592 | 2.589697 | <0.0001        | <0.0001        |
| GO CELL CYCLE CHECKPOINT                                           | 179  | 0.651547 | 2.556352 | <0.0001        | <0.0001        |
| GO MITOTIC SPINDLE ORGANIZATION                                    | 64   | 0.770373 | 2.556195 | <0.0001        | <0.0001        |
| GO REGULATION OF NUCLEAR DIVISION                                  | 153  | 0.623087 | 2.550648 | <0.0001        | <0.0001        |
| GO CHROMOSOMAL REGION                                              | 297  | 0.716265 | 2.548625 | <0.0001        | <0.0001        |
| GO CHROMOSOME CENTROMERIC REGION                                   | 153  | 0.779618 | 2.540278 | <0.0001        | <0.0001        |
| GO DNA RECOMBINATION                                               | 189  | 0.708108 | 2.539063 | <0.0001        | <0.0001        |
| GO CYTOKINESIS                                                     | 80   | 0.659796 | 2.525565 | <0.0001        | <0.0001        |
| GO KINETOCHORE                                                     | 103  | 0.798729 | 2.523413 | <0.0001        | <0.0001        |
| GO NEGATIVE REGULATION OF PROTEIN<br>COMPLEX DISASSEMBLY           | 156  | 0.607188 | 2.518233 | <0.0001        | <0.0001        |
| GO MEIOTIC CELL CYCLE                                              | 162  | 0.655327 | 2.511826 | <0.0001        | <0.0001        |
| GO MEIOTIC CELL CYCLE PROCESS                                      | 130  | 0.673755 | 2.511794 | <0.0001        | <0.0001        |
| GO CONDENSED CHROMOSOME CENTROMERIC<br>REGION                      | 83   | 0.836371 | 2.507111 | <0.0001        | <0.0001        |
| GO CONDENSED NUCLEAR CHROMOSOME                                    | 74   | 0.742605 | 2.506965 | <0.0001        | <0.0001        |
| GO MIDBODY                                                         | 121  | 0.6022   | 2.505331 | <0.0001        | <0.0001        |
| GO DNA REPLICATION                                                 | 192  | 0.731864 | 2.500598 | <0.0001        | <0.0001        |
| GO CELL CYCLE PHASE TRANSITION                                     | 248  | 0.673171 | 2.472004 | <0.0001        | <0.0001        |
| GO REGULATION OF CHROMOSOME<br>SEGREGATION                         | 77   | 0.746082 | 2.471076 | <0.0001        | <0.0001        |
| GO SPINDLE POLE                                                    | 113  | 0.669898 | 2.46671  | <0.0001        | <0.0001        |
| GO MITOTIC SPINDLE                                                 | 50   | 0.719176 | 2.464137 | <0.0001        | <0.0001        |
| GO REGULATION OF SISTER CHROMATID<br>SEGREGATION                   | 61   | 0.735854 | 2.462449 | <0.0001        | <0.0001        |
| GO G2 DNA DAMAGE CHECKPOINT                                        | 31   | 0.742472 | 2.456178 | <0.0001        | <0.0001        |
| GO CELL CYCLE G2 M PHASE TRANSITION                                | 134  | 0.647235 | 2.455047 | <0.0001        | <0.0001        |
| GO CHROMOSOME LOCALIZATION                                         | 56   | 0.738878 | 2.452304 | <0.0001        | <0.0001        |
| GO SISTER CHROMATID COHESION                                       | 100  | 0.814757 | 2.448755 | <0.0001        | <0.0001        |
| GO MEMBRANE DISASSEMBLY                                            | 44   | 0.772361 | 2.445921 | <0.0001        | <0.0001        |
| GO DNA DEPENDENT DNA REPLICATION                                   | 90   | 0.792206 | 2.4393   | <0.0001        | <0.0001        |

|                                                     |     |          |          |         |          |
|-----------------------------------------------------|-----|----------|----------|---------|----------|
| GO DNA INTEGRITY CHECKPOINT                         | 136 | 0.616455 | 2.435896 | <0.0001 | <0.0001  |
| GO SPINDLE ASSEMBLY                                 | 67  | 0.675513 | 2.430131 | <0.0001 | <0.0001  |
| GO REGULATION OF CELL DIVISION                      | 250 | 0.561616 | 2.428758 | <0.0001 | <0.0001  |
| GO MITOTIC CELL CYCLE CHECKPOINT                    | 129 | 0.623171 | 2.428147 | <0.0001 | <0.0001  |
| GO REGULATION OF DNA REPLICATION                    | 152 | 0.607312 | 2.424847 | <0.0001 | <0.0001  |
| GO DNA BIOSYNTHETIC PROCESS                         | 108 | 0.679865 | 2.42479  | <0.0001 | <0.0001  |
| GO REGULATION OF PROTEIN COMPLEX DISASSEMBLY        | 198 | 0.561611 | 2.423981 | <0.0001 | <0.0001  |
| GO NEGATIVE REGULATION OF ORGANELLE ORGANIZATION    | 361 | 0.524476 | 2.414919 | <0.0001 | <0.0001  |
| GO DNA REPAIR                                       | 433 | 0.608988 | 2.414044 | <0.0001 | <0.0001  |
| GO NEGATIVE REGULATION OF CYTOSKELETON ORGANIZATION | 205 | 0.537606 | 2.401888 | <0.0001 | <0.0001  |
| GO NUCLEAR ENVELOPE ORGANIZATION                    | 75  | 0.644243 | 2.399201 | <0.0001 | <0.0001  |
| GO CYTOSKELETON DEPENDENT CYTOKINESIS               | 38  | 0.726307 | 2.39768  | <0.0001 | <0.0001  |
| GO DNA DEPENDENT ATPASE ACTIVITY                    | 76  | 0.75211  | 2.397585 | <0.0001 | <0.0001  |
| GO REPLICATION FORK                                 | 62  | 0.788078 | 2.395891 | <0.0001 | <0.0001  |
| GO PROTEIN SUMOYLATION                              | 112 | 0.675924 | 2.395123 | <0.0001 | <0.0001  |
| GO SOMATIC DIVERSIFICATION OF IMMUNE RECEPTORS      | 37  | 0.731896 | 2.393728 | <0.0001 | <0.0001  |
| GO MULTI ORGANISM LOCALIZATION                      | 65  | 0.695134 | 2.392456 | <0.0001 | <0.0001  |
| GO NUCLEUS ORGANIZATION                             | 124 | 0.597255 | 2.389481 | <0.0001 | <0.0001  |
| GO DNA SYNTHESIS INVOLVED IN DNA REPAIR             | 67  | 0.738807 | 2.388248 | <0.0001 | <0.0001  |
| GO MITOTIC SPINDLE ASSEMBLY                         | 39  | 0.730121 | 2.384423 | <0.0001 | <0.0001  |
| GO ATPASE ACTIVITY                                  | 412 | 0.546545 | 2.38414  | <0.0001 | <0.0001  |
| GO HISTONE KINASE ACTIVITY                          | 18  | 0.869347 | 2.381841 | <0.0001 | <0.0001  |
| GO HISTONE PHOSPHORYLATION                          | 24  | 0.768077 | 2.379646 | <0.0001 | <0.0001  |
| GO SPINDLE MIDZONE                                  | 25  | 0.822831 | 2.376028 | <0.0001 | <0.0001  |
| GO METAPHASE PLATE CONGRESSION                      | 41  | 0.778993 | 2.371539 | <0.0001 | <0.0001  |
| GO REGULATION OF DNA DEPENDENT DNA REPLICATION      | 39  | 0.800185 | 2.365752 | <0.0001 | <0.0001  |
| GO NUCLEAR PERIPHERY                                | 118 | 0.616942 | 2.364359 | <0.0001 | <0.0001  |
| GO NEGATIVE REGULATION OF CELL DIVISION             | 56  | 0.670046 | 2.357604 | <0.0001 | <0.0001  |
| GO MICROTUBULE CYTOSKELETON ORGANIZATION            | 314 | 0.567429 | 2.356141 | <0.0001 | <0.0001  |
| GO RNA LOCALIZATION                                 | 173 | 0.615701 | 2.349783 | <0.0001 | 1.05E-05 |
| GO MEIOTIC CHROMOSOME SEGREGATION                   | 49  | 0.680336 | 2.349619 | <0.0001 | 1.03E-05 |
| GO REGULATION OF MITOTIC CELL CYCLE                 | 444 | 0.528076 | 2.346507 | <0.0001 | 1.02E-05 |
| GO NEGATIVE REGULATION OF CHROMOSOME ORGANIZATION   | 93  | 0.647127 | 2.340031 | <0.0001 | 1.00E-05 |
| GO CELL CYCLE G1 S PHASE TRANSITION                 | 108 | 0.717898 | 2.338962 | <0.0001 | 9.91E-06 |
| GO NEGATIVE REGULATION OF MITOTIC CELL CYCLE        | 184 | 0.54229  | 2.334017 | <0.0001 | 9.77E-06 |
| GO NUCLEAR EXPORT                                   | 139 | 0.625466 | 2.332653 | <0.0001 | 9.64E-06 |
| GO MEIOSIS I                                        | 73  | 0.664922 | 2.329829 | <0.0001 | 9.51E-06 |
| GO REGULATION OF CHROMOSOME ORGANIZATION            | 263 | 0.546924 | 2.328474 | <0.0001 | 9.39E-06 |
| GO SOMATIC DIVERSIFICATION OF IMMUNOGLOBULINS       | 26  | 0.741615 | 2.327723 | <0.0001 | 9.26E-06 |

|                                                                |     |          |          |         |          |
|----------------------------------------------------------------|-----|----------|----------|---------|----------|
| GO CENTROSOME CYCLE                                            | 44  | 0.710459 | 2.325169 | <0.0001 | 9.14E-06 |
| GO NEGATIVE REGULATION OF CELL CYCLE PROCESS                   | 199 | 0.538433 | 2.323229 | <0.0001 | 9.03E-06 |
| GO DNA GEOMETRIC CHANGE                                        | 77  | 0.721333 | 2.322284 | <0.0001 | 8.92E-06 |
| GO REGULATION OF SIGNAL TRANSDUCTION BY P53 CLASS MEDIATOR     | 156 | 0.569462 | 2.321441 | <0.0001 | 8.81E-06 |
| GO REGULATION OF DNA METABOLIC PROCESS                         | 318 | 0.531544 | 2.321098 | <0.0001 | 8.70E-06 |
| GO NEGATIVE REGULATION OF DNA REPLICATION                      | 50  | 0.652957 | 2.320175 | <0.0001 | 8.59E-06 |
| GO MICROTUBULE ORGANIZING CENTER ORGANIZATION                  | 79  | 0.646021 | 2.315917 | <0.0001 | 1.97E-05 |
| GO DOUBLE STRAND BREAK REPAIR                                  | 151 | 0.652402 | 2.312146 | <0.0001 | 1.94E-05 |
| GO NEGATIVE REGULATION OF NUCLEAR DIVISION                     | 42  | 0.692808 | 2.310467 | <0.0001 | 1.92E-05 |
| GO RECOMBINATIONAL REPAIR                                      | 70  | 0.70894  | 2.305188 | <0.0001 | 1.90E-05 |
| GO HELICASE ACTIVITY                                           | 148 | 0.675157 | 2.303484 | <0.0001 | 1.88E-05 |
| GO POSITIVE REGULATION OF CELL CYCLE PROCESS                   | 227 | 0.538833 | 2.303124 | <0.0001 | 1.85E-05 |
| GO MITOTIC CYTOKINESIS                                         | 31  | 0.718289 | 2.295251 | <0.0001 | 2.76E-05 |
| GO POSITIVE REGULATION OF MITOTIC CELL CYCLE                   | 118 | 0.587833 | 2.294271 | <0.0001 | 2.73E-05 |
| GO CENTROSOME                                                  | 457 | 0.516237 | 2.293944 | <0.0001 | 2.70E-05 |
| GO NUCLEAR PORE                                                | 73  | 0.671182 | 2.286681 | <0.0001 | 6.17E-05 |
| GO NEGATIVE REGULATION OF MITOTIC NUCLEAR DIVISION             | 32  | 0.732843 | 2.285027 | <0.0001 | 6.10E-05 |
| GO SOMATIC CELL DNA RECOMBINATION                              | 31  | 0.724322 | 2.284676 | <0.0001 | 6.04E-05 |
| GO REGULATION OF TELOMERE MAINTENANCE                          | 64  | 0.635078 | 2.278184 | <0.0001 | 8.37E-05 |
| GO DNA STRAND ELONGATION                                       | 29  | 0.879653 | 2.277452 | <0.0001 | 8.28E-05 |
| GO REGULATION OF CELL CYCLE G2 M PHASE TRANSITION              | 57  | 0.618936 | 2.275083 | <0.0001 | 9.05E-05 |
| GO REGULATION OF CELL CYCLE PHASE TRANSITION                   | 308 | 0.530402 | 2.273736 | <0.0001 | 1.04E-04 |
| GO TRNA TRANSPORT                                              | 32  | 0.812964 | 2.273654 | <0.0001 | 1.03E-04 |
| GO CHROMOSOME CONDENSATION                                     | 26  | 0.820715 | 2.272898 | <0.0001 | 1.02E-04 |
| GO REGULATION OF CENTROSOME CYCLE                              | 38  | 0.739239 | 2.272252 | <0.0001 | 1.01E-04 |
| GO REGULATION OF TELOMERE MAINTENANCE VIA TELOMERE LENGTHENING | 49  | 0.660699 | 2.271119 | <0.0001 | 1.08E-04 |
| GO RIBONUCLEOPROTEIN COMPLEX LOCALIZATION                      | 112 | 0.649751 | 2.270998 | <0.0001 | 1.07E-04 |
| GO DNA DEPENDENT DNA REPLICATION MAINTENANCE OF FIDELITY       | 19  | 0.841238 | 2.270667 | <0.0001 | 1.06E-04 |
| GO DNA CONFORMATION CHANGE                                     | 243 | 0.654861 | 2.267809 | <0.0001 | 1.05E-04 |
| GO RECIPROCAL DNA RECOMBINATION                                | 34  | 0.723155 | 2.264945 | <0.0001 | 1.04E-04 |
| GO POSITIVE REGULATION OF CELL CYCLE                           | 308 | 0.497873 | 2.26184  | <0.0001 | 1.26E-04 |
| GO SPINDLE LOCALIZATION                                        | 36  | 0.704923 | 2.261765 | <0.0001 | 1.24E-04 |
| GO MITOTIC RECOMBINATION                                       | 41  | 0.853253 | 2.260345 | <0.0001 | 1.30E-04 |
| GO MITOTIC DNA INTEGRITY CHECKPOINT                            | 93  | 0.568916 | 2.259875 | <0.0001 | 1.29E-04 |
| GO NUCLEAR CHROMOSOME                                          | 488 | 0.56416  | 2.255939 | <0.0001 | 1.70E-04 |
| GO POSITIVE REGULATION OF CHROMOSOME                           | 23  | 0.774029 | 2.254839 | <0.0001 | 1.76E-04 |

|                                                                                  |     |          |          |         |          |
|----------------------------------------------------------------------------------|-----|----------|----------|---------|----------|
| SEGREGATION                                                                      |     |          |          |         |          |
| GO CHROMATIN REMODELING                                                          | 139 | 0.596132 | 2.254539 | <0.0001 | 1.74E-04 |
| GO KINESIN COMPLEX                                                               | 53  | 0.68674  | 2.253981 | <0.0001 | 1.73E-04 |
| GO DNA HELICASE ACTIVITY                                                         | 50  | 0.78077  | 2.253384 | <0.0001 | 1.80E-04 |
| GO PURINE NTP DEPENDENT HELICASE ACTIVITY                                        | 95  | 0.668325 | 2.251719 | <0.0001 | 1.92E-04 |
| GO POSITIVE REGULATION OF CELL CYCLE PHASE TRANSITION                            | 66  | 0.612909 | 2.247219 | <0.0001 | 2.52E-04 |
| GO STRAND DISPLACEMENT                                                           | 25  | 0.857924 | 2.244335 | <0.0001 | 2.60E-04 |
| GO NUCLEAR MATRIX                                                                | 95  | 0.571998 | 2.243401 | <0.0001 | 2.58E-04 |
| GO DNA STRAND ELONGATION INVOLVED IN DNA REPLICATION                             | 25  | 0.904276 | 2.242602 | <0.0001 | 2.63E-04 |
| GO MICROTUBULE                                                                   | 382 | 0.493602 | 2.240029 | <0.0001 | 2.87E-04 |
| GO MICROTUBULE BINDING                                                           | 189 | 0.520415 | 2.237755 | <0.0001 | 2.85E-04 |
| GO RESPONSE TO IONIZING RADIATION                                                | 137 | 0.543534 | 2.234383 | <0.0001 | 2.96E-04 |
| GO SOMATIC RECOMBINATION OF IMMUNOGLOBULIN GENE SEGMENTS                         | 21  | 0.753897 | 2.234008 | <0.0001 | 2.94E-04 |
| GO REGULATION OF DOUBLE STRAND BREAK REPAIR                                      | 33  | 0.683869 | 2.21987  | <0.0001 | 3.78E-04 |
| GO ATP DEPENDENT DNA HELICASE ACTIVITY                                           | 32  | 0.769188 | 2.214459 | <0.0001 | 4.10E-04 |
| GO NEGATIVE REGULATION OF CHROMOSOME SEGREGATION                                 | 25  | 0.787655 | 2.212827 | <0.0001 | 4.07E-04 |
| GO PROTEIN LOCALIZATION TO CYTOSKELETON                                          | 28  | 0.668449 | 2.211528 | <0.0001 | 4.10E-04 |
| GO SINGLE STRANDED DNA BINDING                                                   | 78  | 0.637339 | 2.209148 | <0.0001 | 4.28E-04 |
| GO ANAPHASE PROMOTING COMPLEX                                                    | 20  | 0.78991  | 2.207604 | <0.0001 | 4.32E-04 |
| GO ATPASE ACTIVITY COUPLED                                                       | 307 | 0.498259 | 2.205396 | <0.0001 | 4.41E-04 |
| GO REGULATION OF TRANSCRIPTION INVOLVED IN G1 S TRANSITION OF MITOTIC CELL CYCLE | 25  | 0.844392 | 2.204197 | <0.0001 | 4.45E-04 |
| GO CHROMOSOME SEPARATION                                                         | 16  | 0.825543 | 2.203816 | <0.0001 | 4.42E-04 |
| GO SPINDLE CHECKPOINT                                                            | 23  | 0.810519 | 2.200688 | <0.0001 | 4.58E-04 |
| GO NEGATIVE REGULATION OF CELL CYCLE PHASE TRANSITION                            | 137 | 0.527435 | 2.197703 | <0.0001 | 4.84E-04 |
| GO RNA 3 END PROCESSING                                                          | 96  | 0.632007 | 2.195773 | <0.0001 | 4.80E-04 |
| GO NUCLEOBASE CONTAINING COMPOUND TRANSPORT                                      | 187 | 0.544178 | 2.195028 | <0.0001 | 4.83E-04 |
| GO DNA REPLICATION INITIATION                                                    | 29  | 0.86371  | 2.189515 | <0.0001 | 5.16E-04 |
| GO REGULATION OF CELLULAR RESPONSE TO HEAT                                       | 72  | 0.643045 | 2.187421 | <0.0001 | 5.50E-04 |
| GO POSITIVE REGULATION OF TELOMERE MAINTENANCE                                   | 44  | 0.624996 | 2.186949 | <0.0001 | 5.46E-04 |
| GO DNA DIRECTED DNA POLYMERASE ACTIVITY                                          | 26  | 0.69116  | 2.183641 | <0.0001 | 5.49E-04 |
| GO REGULATION OF CYTOKINESIS                                                     | 56  | 0.60157  | 2.183209 | <0.0001 | 5.58E-04 |
| GO MRNA 3 END PROCESSING                                                         | 71  | 0.653102 | 2.183206 | <0.0001 | 5.54E-04 |
| GO POSITIVE REGULATION OF DNA METABOLIC PROCESS                                  | 174 | 0.500897 | 2.179585 | <0.0001 | 5.78E-04 |
| GO SIGNAL TRANSDUCTION IN RESPONSE TO                                            | 91  | 0.560032 | 2.17819  | <0.0001 | 5.96E-04 |

|                                                                                     |     |          |          |         |          |
|-------------------------------------------------------------------------------------|-----|----------|----------|---------|----------|
| DNA DAMAGE                                                                          |     |          |          |         |          |
| GO TELOMERE MAINTENANCE VIA RECOMBINATION                                           | 32  | 0.845018 | 2.177901 | <0.0001 | 5.92E-04 |
| GO MICROTUBULE END                                                                  | 21  | 0.762806 | 2.177106 | <0.0001 | 5.88E-04 |
| GO ATP DEPENDENT MICROTUBULE MOTOR ACTIVITY                                         | 18  | 0.821186 | 2.173439 | <0.0001 | 6.26E-04 |
| GO INTERSTRAND CROSS LINK REPAIR                                                    | 38  | 0.686513 | 2.173382 | <0.0001 | 6.22E-04 |
| GO MICROTUBULE POLYMERIZATION OR DEPOLYMERIZATION                                   | 38  | 0.623258 | 2.173214 | <0.0001 | 6.25E-04 |
| GO HETEROCHROMATIN                                                                  | 65  | 0.61276  | 2.170755 | <0.0001 | 6.37E-04 |
| GO NEGATIVE REGULATION OF CELLULAR PROTEIN CATABOLIC PROCESS                        | 60  | 0.579122 | 2.169545 | <0.0001 | 6.55E-04 |
| GO HEAT SHOCK PROTEIN BINDING                                                       | 86  | 0.557312 | 2.167885 | <0.0001 | 6.51E-04 |
| GO PROTEIN EXPORT FROM NUCLEUS                                                      | 29  | 0.655804 | 2.166861 | <0.0001 | 6.77E-04 |
| GO EXONUCLEASE ACTIVITY                                                             | 70  | 0.580711 | 2.161916 | <0.0001 | 7.27E-04 |
| GO POSITIVE REGULATION OF DNA BIOSYNTHETIC PROCESS                                  | 57  | 0.583944 | 2.161853 | <0.0001 | 7.22E-04 |
| GO RNA POLYADENYLATION                                                              | 29  | 0.704223 | 2.160275 | <0.0001 | 7.29E-04 |
| GO FEMALE MEIOTIC DIVISION                                                          | 22  | 0.724275 | 2.159829 | <0.0001 | 7.25E-04 |
| GO NUCLEAR REPLICATION FORK                                                         | 39  | 0.738987 | 2.158608 | <0.0001 | 7.42E-04 |
| GO PROTEIN UBIQUITINATION INVOLVED IN UBIQUITIN DEPENDENT PROTEIN CATABOLIC PROCESS | 127 | 0.528314 | 2.158536 | <0.0001 | 7.37E-04 |
| GO POSITIVE REGULATION OF MITOTIC NUCLEAR DIVISION                                  | 46  | 0.609649 | 2.155905 | <0.0001 | 8.01E-04 |
| GO REGULATION OF DNA BIOSYNTHETIC PROCESS                                           | 90  | 0.537845 | 2.154432 | <0.0001 | 8.16E-04 |
| GO REGULATION OF DNA REPAIR                                                         | 68  | 0.591068 | 2.14987  | <0.0001 | 8.68E-04 |
| GO NEGATIVE REGULATION OF CELL CYCLE                                                | 404 | 0.439902 | 2.143356 | <0.0001 | 9.52E-04 |
| GO REGULATION OF CHROMATIN SILENCING                                                | 21  | 0.747849 | 2.142313 | <0.0001 | 9.47E-04 |
| GO TUBULIN BINDING                                                                  | 255 | 0.47973  | 2.138896 | <0.0001 | 9.95E-04 |
| GO RESPONSE TO GAMMA RADIATION                                                      | 49  | 0.577475 | 2.137084 | <0.0001 | 0.001013 |
| GO REGULATION OF DOUBLE STRAND BREAK REPAIR VIA HOMOLOGOUS RECOMBINATION            | 17  | 0.780716 | 2.136381 | <0.0001 | 0.001013 |
| GO MICROTUBULE BASED PROCESS                                                        | 478 | 0.49037  | 2.135001 | <0.0001 | 0.001046 |
| GO BLASTOCYST GROWTH                                                                | 15  | 0.798958 | 2.13441  | <0.0001 | 0.001047 |
| GO CHROMOSOME TELOMERIC REGION                                                      | 150 | 0.613272 | 2.130309 | <0.0001 | 0.001123 |
| GO ATP DEPENDENT CHROMATIN REMODELING                                               | 67  | 0.688353 | 2.130273 | <0.0001 | 0.001117 |
| GO NUCLEAR IMPORT                                                                   | 126 | 0.51719  | 2.130023 | <0.0001 | 0.001116 |
| GO PRONUCLEUS                                                                       | 15  | 0.869304 | 2.126436 | <0.0001 | 0.001158 |
| GO REPLISOME                                                                        | 29  | 0.739198 | 2.125365 | <0.0001 | 0.001156 |
| GO REGULATION OF PROTEASOMAL UBIQUITIN DEPENDENT PROTEIN CATABOLIC PROCESS          | 141 | 0.506234 | 2.120427 | <0.0001 | 0.001258 |
| GO DNA SECONDARY STRUCTURE BINDING                                                  | 24  | 0.737121 | 2.120405 | <0.0001 | 0.00125  |
| GO NUCLEAR TRANSPORT                                                                | 341 | 0.466141 | 2.116048 | <0.0001 | 0.00135  |
| GO MICROTUBULE ASSOCIATED COMPLEX                                                   | 141 | 0.525455 | 2.112357 | <0.0001 | 0.00143  |
| GO TETRAHYDROFOLATE METABOLIC PROCESS                                               | 19  | 0.742573 | 2.110568 | <0.0001 | 0.001437 |
| GO REGULATION OF CENTROSOME                                                         | 31  | 0.673565 | 2.109085 | <0.0001 | 0.001469 |

|                                                                         |     |          |          |          |          |
|-------------------------------------------------------------------------|-----|----------|----------|----------|----------|
| DUPLICATION                                                             |     |          |          |          |          |
| GO PEPTIDYL LYSINE MODIFICATION                                         | 278 | 0.507345 | 2.107943 | <0.0001  | 0.001476 |
| GO RAN GTPASE BINDING                                                   | 31  | 0.734209 | 2.107892 | <0.0001  | 0.001472 |
| GO MITOTIC G2 M TRANSITION CHECKPOINT                                   | 17  | 0.727178 | 2.107629 | <0.0001  | 0.001471 |
| GO NUCLEAR HETEROCHROMATIN                                              | 31  | 0.687675 | 2.107301 | <0.0001  | 0.001469 |
| GO PROTEIN LOCALIZATION TO CHROMOSOME                                   | 37  | 0.676805 | 2.104992 | <0.0001  | 0.001513 |
| GO REGULATION OF DNA RECOMBINATION                                      | 53  | 0.586606 | 2.102456 | <0.0001  | 0.001559 |
| GO NUCLEAR LOCALIZATION SEQUENCE BINDING                                | 20  | 0.778758 | 2.101085 | <0.0001  | 0.001565 |
| GO HISTONE METHYLTRANSFERASE COMPLEX                                    | 64  | 0.603817 | 2.100345 | <0.0001  | 0.001575 |
| GO SIGNAL SEQUENCE BINDING                                              | 36  | 0.642677 | 2.098635 | <0.0001  | 0.001619 |
| GO MICROTUBULE ORGANIZING CENTER PART                                   | 133 | 0.54475  | 2.097315 | <0.0001  | 0.001661 |
| GO PROTEIN PHOSPHATASE 2A BINDING                                       | 27  | 0.642852 | 2.095832 | <0.0001  | 0.001712 |
| GO POSITIVE REGULATION OF TELOMERE MAINTENANCE VIA TELOMERE LENGTHENING | 32  | 0.64283  | 2.092268 | <0.0001  | 0.001775 |
| GO BASE EXCISION REPAIR                                                 | 39  | 0.627767 | 2.091925 | 0.001996 | 0.00178  |
| GO NEGATIVE REGULATION OF DNA METABOLIC PROCESS                         | 104 | 0.528153 | 2.090345 | <0.0001  | 0.001834 |
| GO NUCLEAR UBIQUITIN LIGASE COMPLEX                                     | 39  | 0.622718 | 2.089995 | <0.0001  | 0.001828 |
| GO CYTOPLASMIC MICROTUBULE                                              | 51  | 0.531455 | 2.086745 | <0.0001  | 0.001903 |
| GO POSITIVE REGULATION OF CHROMOSOME ORGANIZATION                       | 141 | 0.499468 | 2.086528 | <0.0001  | 0.001908 |
| GO DNA REPLICATION INDEPENDENT NUCLEOSOME ORGANIZATION                  | 47  | 0.739084 | 2.086273 | 0.002008 | 0.001911 |
| GO RNA HELICASE ACTIVITY                                                | 67  | 0.62087  | 2.085402 | <0.0001  | 0.00193  |
| GO G1 DNA DAMAGE CHECKPOINT                                             | 68  | 0.543067 | 2.084571 | <0.0001  | 0.001952 |
| GO POSITIVE REGULATION OF CYTOKINESIS                                   | 28  | 0.667476 | 2.082158 | <0.0001  | 0.002019 |
| GO HISTONE MRNA METABOLIC PROCESS                                       | 28  | 0.699677 | 2.082111 | <0.0001  | 0.002009 |
| GO NUCLEAR BODY                                                         | 334 | 0.472133 | 2.08111  | <0.0001  | 0.002023 |
| GO MICROTUBULE PLUS END                                                 | 16  | 0.782717 | 2.07877  | <0.0001  | 0.002096 |
| GO NCRNA TRANSCRIPTION                                                  | 80  | 0.569304 | 2.078149 | <0.0001  | 0.002117 |
| GO DNA POLYMERASE ACTIVITY                                              | 33  | 0.641351 | 2.07579  | <0.0001  | 0.002182 |
| GO NUCLEAR ENVELOPE                                                     | 381 | 0.440081 | 2.073704 | <0.0001  | 0.002246 |
| GO NUCLEIC ACID PHOSPHODIESTER BOND HYDROLYSIS                          | 230 | 0.49755  | 2.072707 | <0.0001  | 0.002301 |
| GO CELLULAR RESPONSE TO GAMMA RADIATION                                 | 19  | 0.680358 | 2.067889 | 0.001992 | 0.002425 |
| GO CENTROMERE COMPLEX ASSEMBLY                                          | 42  | 0.782528 | 2.066985 | <0.0001  | 0.002442 |
| GO POSITIVE REGULATION OF DNA REPLICATION                               | 84  | 0.520644 | 2.063836 | <0.0001  | 0.002582 |
| GO RETROGRADE VESICLE MEDIATED TRANSPORT GOLGI TO ER                    | 75  | 0.57885  | 2.063153 | <0.0001  | 0.002592 |
| GO ESTABLISHMENT OF MITOTIC SPINDLE LOCALIZATION                        | 23  | 0.684882 | 2.062194 | <0.0001  | 0.0026   |
| GO REGULATION OF MRNA METABOLIC PROCESS                                 | 113 | 0.55388  | 2.060332 | <0.0001  | 0.00265  |
| GO METHYLTRANSFERASE COMPLEX                                            | 83  | 0.606673 | 2.059736 | <0.0001  | 0.002666 |
| GO DNA PACKAGING                                                        | 168 | 0.634984 | 2.05899  | 0.001961 | 0.002673 |
| GO CHROMATIN MODIFICATION                                               | 490 | 0.479084 | 2.056361 | <0.0001  | 0.002761 |

|                                                            |     |          |          |          |          |
|------------------------------------------------------------|-----|----------|----------|----------|----------|
| GO CENTRIOLE                                               | 91  | 0.564999 | 2.054757 | 0.002041 | 0.002819 |
| GO NUCLEAR MEMBRANE                                        | 254 | 0.438168 | 2.05342  | <0.0001  | 0.002857 |
| GO RNA SPLICING VIA TRANSESTERIFICATION REACTIONS          | 259 | 0.567014 | 2.052311 | <0.0001  | 0.002909 |
| GO POSTREPLICATION REPAIR                                  | 48  | 0.620328 | 2.051865 | <0.0001  | 0.002909 |
| GO TERMINATION OF RNA POLYMERASE II TRANSCRIPTION          | 61  | 0.633137 | 2.051615 | <0.0001  | 0.002905 |
| GO CATALYTIC STEP 2 SPLICEOSOME                            | 84  | 0.63399  | 2.051142 | <0.0001  | 0.002907 |
| GO MRNA CLEAVAGE FACTOR COMPLEX                            | 17  | 0.759932 | 2.050455 | <0.0001  | 0.002926 |
| GO NUCLEOTIDE EXCISION REPAIR DNA GAP FILLING              | 24  | 0.721295 | 2.048837 | 0.002016 | 0.00297  |
| GO PROTEIN DEPOLYMERIZATION                                | 23  | 0.662483 | 2.048375 | <0.0001  | 0.002984 |
| GO HSP70 PROTEIN BINDING                                   | 28  | 0.621915 | 2.048138 | <0.0001  | 0.002978 |
| GO MISMATCH REPAIR                                         | 26  | 0.699113 | 2.048065 | <0.0001  | 0.002965 |
| GO DEOXYRIBONUCLEASE ACTIVITY                              | 63  | 0.572157 | 2.047669 | <0.0001  | 0.002966 |
| GO POSITIVE REGULATION OF CELL DIVISION                    | 117 | 0.501527 | 2.046629 | <0.0001  | 0.002968 |
| GO REGULATION OF RESPONSE TO DNA DAMAGE STIMULUS           | 134 | 0.491593 | 2.046034 | <0.0001  | 0.003002 |
| GO CELLULAR RESPONSE TO IONIZING RADIATION                 | 50  | 0.559121 | 2.044637 | <0.0001  | 0.003043 |
| GO REGULATION OF CYTOSKELETON ORGANIZATION                 | 470 | 0.423661 | 2.044242 | <0.0001  | 0.003037 |
| GO CHROMOSOME ORGANIZATION INVOLVED IN MEIOTIC CELL CYCLE  | 40  | 0.604767 | 2.043671 | 0.002123 | 0.00303  |
| GO ISOTYPE SWITCHING                                       | 16  | 0.702461 | 2.041907 | <0.0001  | 0.003121 |
| GO FOUR WAY JUNCTION DNA BINDING                           | 15  | 0.808127 | 2.041414 | <0.0001  | 0.003128 |
| GO NUCLEAR CHROMOSOME TELOMERIC REGION                     | 122 | 0.612332 | 2.040933 | <0.0001  | 0.003121 |
| GO DNA REPAIR COMPLEX                                      | 37  | 0.619853 | 2.040891 | <0.0001  | 0.003108 |
| GO CHROMATIN BINDING                                       | 408 | 0.47666  | 2.039593 | <0.0001  | 0.003159 |
| GO DNA TEMPLATED TRANSCRIPTION TERMINATION                 | 97  | 0.598075 | 2.037204 | <0.0001  | 0.003256 |
| GO NUCLEASE ACTIVITY                                       | 185 | 0.477699 | 2.03691  | <0.0001  | 0.003255 |
| GO CELL DIVISION SITE                                      | 47  | 0.577241 | 2.028183 | <0.0001  | 0.003674 |
| GO ENDODEOXYRIBONUCLEASE ACTIVITY                          | 48  | 0.587723 | 2.025692 | <0.0001  | 0.003753 |
| GO NEGATIVE REGULATION OF CELL CYCLE G2 M PHASE TRANSITION | 23  | 0.62163  | 2.024815 | <0.0001  | 0.003793 |
| GO MRNA PROCESSING                                         | 405 | 0.523069 | 2.02164  | <0.0001  | 0.003954 |
| GO RNA SPLICING                                            | 347 | 0.54014  | 2.01721  | <0.0001  | 0.004176 |
| GO STRUCTURE SPECIFIC DNA BINDING                          | 114 | 0.522247 | 2.014924 | <0.0001  | 0.0043   |
| GO DNA DAMAGE RESPONSE DETECTION OF DNA DAMAGE             | 36  | 0.693493 | 2.012533 | <0.0001  | 0.004419 |
| GO NUCLEOCYTOPLASMIC TRANSPORTER ACTIVITY                  | 23  | 0.745203 | 2.010531 | <0.0001  | 0.004553 |
| GO PROTEIN LOCALIZATION TO CENTROSOME                      | 15  | 0.708968 | 2.008624 | <0.0001  | 0.004699 |
| GO MRNA CIS SPLICING VIA SPLICEOSOME                       | 18  | 0.731885 | 2.008383 | <0.0001  | 0.004705 |
| GO POSITIVE REGULATION OF NUCLEAR DIVISION                 | 57  | 0.540259 | 2.008326 | <0.0001  | 0.004692 |
| GO POSITIVE REGULATION OF CELL CYCLE                       | 79  | 0.495278 | 2.007417 | <0.0001  | 0.004712 |



|                                                                                                             |     |          |          |          |          |
|-------------------------------------------------------------------------------------------------------------|-----|----------|----------|----------|----------|
| ARREST                                                                                                      |     |          |          |          |          |
| GO NUCLEOBASE BIOSYNTHETIC PROCESS                                                                          | 17  | 0.780294 | 2.006151 | <0.0001  | 0.004778 |
| GO NEGATIVE REGULATION OF CHROMATIN MODIFICATION                                                            | 44  | 0.582162 | 2.005816 | 0.002096 | 0.004798 |
| GO SEX CHROMOSOME                                                                                           | 27  | 0.679758 | 2.00037  | <0.0001  | 0.005153 |
| GO CELLULAR RESPONSE TO HEAT                                                                                | 33  | 0.593175 | 1.994971 | <0.0001  | 0.005475 |
| GO SNRNA PROCESSING                                                                                         | 20  | 0.699159 | 1.993753 | <0.0001  | 0.005532 |
| GO CENTROSOME DUPLICATION                                                                                   | 31  | 0.6538   | 1.992964 | 0.002024 | 0.005555 |
| GO SPLICEOSOMAL COMPLEX                                                                                     | 162 | 0.567743 | 1.992657 | <0.0001  | 0.005551 |
| GO UBIQUITIN LIKE PROTEIN BINDING                                                                           | 113 | 0.490234 | 1.991558 | <0.0001  | 0.005579 |
| GO REGULATION OF CYCLIN DEPENDENT PROTEIN KINASE ACTIVITY                                                   | 93  | 0.474244 | 1.990771 | <0.0001  | 0.0056   |
| GO DOUBLE STRANDED RNA BINDING                                                                              | 59  | 0.565659 | 1.989945 | <0.0001  | 0.005644 |
| GO REGULATION OF CELL CYCLE G1 S PHASE TRANSITION                                                           | 140 | 0.455297 | 1.986695 | <0.0001  | 0.005874 |
| GO CAJAL BODY                                                                                               | 49  | 0.587838 | 1.985149 | <0.0001  | 0.005961 |
| GO HISTONE EXCHANGE                                                                                         | 46  | 0.73396  | 1.984435 | 0.002058 | 0.005966 |
| GO PROTEIN K63 LINKED UBIQUITINATION                                                                        | 34  | 0.57288  | 1.98191  | <0.0001  | 0.006134 |
| GO GAMMA TUBULIN COMPLEX                                                                                    | 19  | 0.669204 | 1.981785 | 0.002096 | 0.006125 |
| GO CYCLIN DEPENDENT PROTEIN KINASE HOLOENZYME COMPLEX                                                       | 30  | 0.594797 | 1.979752 | <0.0001  | 0.006273 |
| GO REGULATION OF GLUCOSE TRANSPORT                                                                          | 93  | 0.493705 | 1.975881 | <0.0001  | 0.006485 |
| GO REGULATION OF UBIQUITIN PROTEIN LIGASE ACTIVITY                                                          | 17  | 0.669785 | 1.973125 | 0.002049 | 0.006683 |
| GO REGULATION OF CELL CYCLE CHECKPOINT                                                                      | 27  | 0.650903 | 1.973067 | 0.00404  | 0.006662 |
| GO RRNA TRANSCRIPTION                                                                                       | 17  | 0.690885 | 1.972289 | <0.0001  | 0.006711 |
| GO DNA LIGATION                                                                                             | 16  | 0.723128 | 1.971955 | <0.0001  | 0.006713 |
| GO EXONUCLEASE ACTIVITY ACTIVE WITH EITHER RIBO OR DEOXYRIBONUCLEIC ACIDS AND PRODUCING 5 PHOSPHOMONOESTERS | 40  | 0.579127 | 1.971129 | <0.0001  | 0.006778 |
| GO NEGATIVE REGULATION OF PROTEIN CATABOLIC PROCESS                                                         | 103 | 0.452858 | 1.969879 | <0.0001  | 0.006834 |
| GO MICROTUBULE MOTOR ACTIVITY                                                                               | 75  | 0.589855 | 1.96985  | <0.0001  | 0.006813 |
| GO DNA TEMPLATED TRANSCRIPTION ELONGATION                                                                   | 86  | 0.56271  | 1.968954 | 0.002008 | 0.006848 |
| GO POLY PYRIMIDINE TRACT BINDING                                                                            | 17  | 0.728195 | 1.968503 | <0.0001  | 0.006856 |
| GO TRANSLESION SYNTHESIS                                                                                    | 36  | 0.596081 | 1.967985 | <0.0001  | 0.006861 |
| GO NEGATIVE REGULATION OF DNA DEPENDENT DNA REPLICATION                                                     | 15  | 0.773595 | 1.967123 | <0.0001  | 0.006899 |
| GO CHROMATIN                                                                                                | 407 | 0.486591 | 1.963476 | 0.00202  | 0.007223 |
| GO NEGATIVE REGULATION OF PROTEIN MODIFICATION BY SMALL PROTEIN CONJUGATION OR REMOVAL                      | 134 | 0.546519 | 1.963432 | <0.0001  | 0.007197 |
| GO SNRNA METABOLIC PROCESS                                                                                  | 74  | 0.556635 | 1.962609 | <0.0001  | 0.00725  |
| GO RIBONUCLEOPROTEIN COMPLEX BINDING                                                                        | 89  | 0.531998 | 1.961532 | 0.002041 | 0.007342 |
| GO HOMOLOGOUS CHROMOSOME SEGREGATION                                                                        | 37  | 0.594856 | 1.956747 | 0.002183 | 0.007777 |
| GO REGULATION OF PROTEIN EXPORT FROM NUCLEUS                                                                | 33  | 0.547334 | 1.956635 | <0.0001  | 0.007768 |

|                                                                                          |     |          |          |          |          |
|------------------------------------------------------------------------------------------|-----|----------|----------|----------|----------|
| GO REGULATION OF PROTEASOMAL PROTEIN CATABOLIC PROCESS                                   | 173 | 0.45571  | 1.954466 | <0.0001  | 0.007994 |
| GO RNA SECONDARY STRUCTURE UNWINDING                                                     | 40  | 0.601168 | 1.95406  | <0.0001  | 0.008009 |
| GO EUCHROMATIN                                                                           | 30  | 0.599649 | 1.953466 | 0.00202  | 0.008065 |
| GO SYNAPTONEMAL COMPLEX                                                                  | 31  | 0.601978 | 1.953426 | 0.002101 | 0.008044 |
| GO TRANSFERASE COMPLEX TRANSFERRING PHOSPHORUS CONTAINING GROUPS                         | 230 | 0.452708 | 1.95308  | <0.0001  | 0.008048 |
| GO DAMAGED DNA BINDING                                                                   | 62  | 0.558051 | 1.952278 | 0.004184 | 0.008097 |
| GO NUCLEAR TRANSCRIPTION FACTOR COMPLEX                                                  | 125 | 0.465011 | 1.946358 | <0.0001  | 0.008652 |
| GO SWI SNF SUPERFAMILY TYPE COMPLEX                                                      | 71  | 0.556771 | 1.941781 | <0.0001  | 0.009093 |
| GO PML BODY                                                                              | 93  | 0.46955  | 1.941196 | <0.0001  | 0.00912  |
| GO PROTEIN IMPORT                                                                        | 150 | 0.440816 | 1.939846 | <0.0001  | 0.009263 |
| GO TELOMERE ORGANIZATION                                                                 | 101 | 0.599753 | 1.935023 | <0.0001  | 0.009839 |
| GO NUCLEOLAR PART                                                                        | 59  | 0.636255 | 1.933081 | 0.005906 | 0.010053 |
| GO MATURATION OF 5 8S RRNA FROM TRICISTRONIC RRNA TRANSCRIPT SSU RRNA 5 8S RRNA LSU RRNA | 19  | 0.728647 | 1.930914 | <0.0001  | 0.010265 |
| GO PROTEIN K11 LINKED UBIQUITINATION                                                     | 26  | 0.658576 | 1.930709 | <0.0001  | 0.010279 |
| GO NUCLEOTIDYLTRANSFERASE ACTIVITY                                                       | 123 | 0.482525 | 1.929282 | <0.0001  | 0.010438 |
| GO TRNA METABOLIC PROCESS                                                                | 166 | 0.557165 | 1.928585 | 0.007984 | 0.010474 |
| GO REGULATION OF CELL CYCLE ARREST                                                       | 100 | 0.461459 | 1.927339 | <0.0001  | 0.010648 |
| GO SMALL SUBUNIT PROCESSOME                                                              | 32  | 0.681872 | 1.927079 | 0.006073 | 0.01063  |
| GO NEGATIVE REGULATION OF DNA RECOMBINATION                                              | 15  | 0.692229 | 1.925733 | 0.006085 | 0.010748 |
| GO NUCLEOBASE METABOLIC PROCESS                                                          | 37  | 0.582812 | 1.921916 | <0.0001  | 0.011306 |
| GO RNA PHOSPHODIESTER BOND HYDROLYSIS                                                    | 107 | 0.496908 | 1.920012 | <0.0001  | 0.011547 |
| GO MALE MEIOSIS I                                                                        | 15  | 0.67099  | 1.917993 | 0.002066 | 0.011816 |
| GO 90S PRERIBOSOME                                                                       | 23  | 0.723413 | 1.917468 | 0.005976 | 0.011842 |
| GO REGULATION OF TELOMERASE ACTIVITY                                                     | 41  | 0.519909 | 1.915489 | <0.0001  | 0.012009 |
| GO REGULATION OF MRNA SPLICING VIA SPLICEOSOME                                           | 60  | 0.572947 | 1.914435 | <0.0001  | 0.012097 |
| GO MALE MEIOSIS                                                                          | 34  | 0.586112 | 1.914209 | 0.002137 | 0.012097 |
| GO SITE OF DOUBLE STRAND BREAK                                                           | 28  | 0.619545 | 1.913298 | <0.0001  | 0.012214 |
| GO MRNA BINDING                                                                          | 143 | 0.483458 | 1.910893 | 0.006073 | 0.012482 |
| GO BLASTOCYST DEVELOPMENT                                                                | 58  | 0.534723 | 1.908463 | <0.0001  | 0.012829 |
| GO POSITIVE REGULATION OF MRNA METABOLIC PROCESS                                         | 42  | 0.559521 | 1.906602 | <0.0001  | 0.013045 |
| GO TELOMERASE HOLOENZYME COMPLEX                                                         | 19  | 0.682356 | 1.906222 | <0.0001  | 0.013053 |
| GO NON RECOMBINATIONAL REPAIR                                                            | 65  | 0.588037 | 1.906148 | <0.0001  | 0.013021 |
| GO POSITIVE REGULATION OF MRNA PROCESSING                                                | 30  | 0.590228 | 1.902495 | <0.0001  | 0.013507 |
| GO NUCLEOSOME BINDING                                                                    | 44  | 0.589376 | 1.902061 | <0.0001  | 0.0135   |
| GO KINESIN BINDING                                                                       | 30  | 0.590016 | 1.899891 | 0.00432  | 0.013753 |
| GO MLL1 2 COMPLEX                                                                        | 26  | 0.634347 | 1.897575 | 0.006122 | 0.014027 |
| GO REGULATION OF PROTEIN MODIFICATION BY SMALL PROTEIN CONJUGATION OR REMOVAL            | 266 | 0.448642 | 1.896672 | <0.0001  | 0.014127 |
| GO REGULATION OF TELOMERASE RNA                                                          | 15  | 0.824613 | 1.895117 | 0.001984 | 0.014293 |

|                                                                                                                    |     |          |          |          |          |
|--------------------------------------------------------------------------------------------------------------------|-----|----------|----------|----------|----------|
| LOCALIZATION TO CAJAL BODY                                                                                         |     |          |          |          |          |
| GO SINGLE STRANDED RNA BINDING                                                                                     | 63  | 0.503819 | 1.893925 | 0.004274 | 0.014495 |
| GO CENTRIOLE ASSEMBLY                                                                                              | 18  | 0.713908 | 1.89333  | 0.006276 | 0.014529 |
| GO CELLULAR RESPONSE TO RADIATION                                                                                  | 130 | 0.435298 | 1.893117 | <0.0001  | 0.014522 |
| GO ANAPHASE PROMOTING COMPLEX<br>DEPENDENT CATABOLIC PROCESS                                                       | 75  | 0.676796 | 1.887743 | <0.0001  | 0.015268 |
| GO UBIQUITIN LIKE PROTEIN CONJUGATING<br>ENZYME ACTIVITY                                                           | 29  | 0.637061 | 1.883956 | 0.002066 | 0.015849 |
| GO INTERCELLULAR BRIDGE                                                                                            | 40  | 0.52002  | 1.883849 | 0.006098 | 0.015824 |
| GO ENDONUCLEASE ACTIVITY ACTIVE WITH<br>EITHER RIBO OR DEOXYRIBONUCLEIC ACIDS<br>AND PRODUCING 5 PHOSPHOMONOESTERS | 34  | 0.610515 | 1.882334 | <0.0001  | 0.016016 |
| GO COVALENT CHROMATIN MODIFICATION                                                                                 | 309 | 0.444392 | 1.877049 | 0.002128 | 0.016903 |
| GO TRANSCRIPTION ELONGATION FROM RNA<br>POLYMERASE II PROMOTER                                                     | 71  | 0.543671 | 1.876523 | 0.002012 | 0.016928 |
| GO NUCLEAR SPECK                                                                                                   | 188 | 0.455373 | 1.875969 | 0.002053 | 0.016944 |
| GO RNA POLYMERASE II CARBOXY TERMINAL<br>DOMAIN KINASE ACTIVITY                                                    | 16  | 0.674287 | 1.875679 | 0.007937 | 0.016943 |
| GO NLS BEARING PROTEIN IMPORT INTO<br>NUCLEUS                                                                      | 22  | 0.668471 | 1.873533 | 0.002066 | 0.017281 |
| GO ENDORIBONUCLEASE ACTIVITY<br>PRODUCING 5 PHOSPHOMONOESTERS                                                      | 26  | 0.655121 | 1.870329 | 0.002033 | 0.017814 |
| GO CORE PROMOTER BINDING                                                                                           | 146 | 0.441218 | 1.86935  | <0.0001  | 0.017943 |
| GO PORE COMPLEX ASSEMBLY                                                                                           | 15  | 0.735202 | 1.869193 | <0.0001  | 0.017928 |
| GO REGULATION OF CELLULAR PROTEIN<br>CATABOLIC PROCESS                                                             | 262 | 0.436465 | 1.864555 | 0.002079 | 0.018815 |
| GO REGULATION OF CELL AGING                                                                                        | 32  | 0.555262 | 1.864374 | 0.008282 | 0.018804 |
| GO NUCLEAR CYCLIN DEPENDENT PROTEIN<br>KINASE HOLOENZYME COMPLEX                                                   | 15  | 0.677438 | 1.863766 | 0.004184 | 0.018844 |
| GO ORGANELLE LOCALIZATION                                                                                          | 393 | 0.386607 | 1.863514 | <0.0001  | 0.018839 |
| GO BASAL TRANSCRIPTION MACHINERY<br>BINDING                                                                        | 23  | 0.626006 | 1.863509 | 0.004032 | 0.018784 |
| GO PROTEIN DNA COMPLEX SUBUNIT<br>ORGANIZATION                                                                     | 208 | 0.534491 | 1.863119 | 0.002    | 0.018799 |
| GO PROTEIN LOCALIZATION TO NUCLEUS                                                                                 | 151 | 0.424184 | 1.861604 | <0.0001  | 0.019029 |
| GO NEGATIVE REGULATION OF TELOMERE<br>MAINTENANCE VIA TELOMERE LENGTHENING                                         | 17  | 0.67086  | 1.860122 | 0.007921 | 0.019276 |
| GO REGULATION OF RNA STABILITY                                                                                     | 135 | 0.491163 | 1.857657 | 0.002083 | 0.019757 |
| GO ACETYLTRANSFERASE COMPLEX                                                                                       | 84  | 0.505237 | 1.856431 | 0.002212 | 0.019944 |
| GO CELL DIFFERENTIATION INVOLVED IN<br>EMBRYONIC PLACENTA DEVELOPMENT                                              | 25  | 0.609406 | 1.856358 | 0.004292 | 0.019904 |
| GO TRANSCRIPTION ELONGATION FACTOR<br>COMPLEX                                                                      | 36  | 0.547939 | 1.854068 | 0.00404  | 0.020289 |
| GO SPERMATID NUCLEUS DIFFERENTIATION                                                                               | 15  | 0.648862 | 1.851105 | <0.0001  | 0.020858 |
| GO POSITIVE REGULATION OF CELL CYCLE G2<br>M PHASE TRANSITION                                                      | 18  | 0.616072 | 1.850314 | 0.004008 | 0.020957 |
| GO DNA DOUBLE STRAND BREAK PROCESSING                                                                              | 19  | 0.646722 | 1.847508 | 0.010225 | 0.021506 |
| GO LAMIN BINDING                                                                                                   | 17  | 0.574237 | 1.841921 | 0.004175 | 0.022699 |
| GO PROTEIN MONOUBIQUITINATION                                                                                      | 49  | 0.541169 | 1.841176 | 0.004301 | 0.022778 |

|                                                                                                                                                                                                  |     |          |          |          |          |
|--------------------------------------------------------------------------------------------------------------------------------------------------------------------------------------------------|-----|----------|----------|----------|----------|
| GO IMMUNOGLOBULIN PRODUCTION                                                                                                                                                                     | 40  | 0.540793 | 1.840476 | 0.004082 | 0.022911 |
| GO ENDONUCLEASE ACTIVITY                                                                                                                                                                         | 115 | 0.451229 | 1.838041 | <0.0001  | 0.023445 |
| GO MRNA CLEAVAGE                                                                                                                                                                                 | 17  | 0.644799 | 1.838017 | 0.00823  | 0.02338  |
| GO HISTONE BINDING                                                                                                                                                                               | 164 | 0.501355 | 1.837831 | 0.00404  | 0.023367 |
| GO SIGNAL TRANSDUCTION BY P53 CLASS MEDIATOR                                                                                                                                                     | 120 | 0.420295 | 1.83697  | <0.0001  | 0.023498 |
| GO MOTOR ACTIVITY                                                                                                                                                                                | 128 | 0.461552 | 1.83641  | <0.0001  | 0.023563 |
| GO REGULATION OF SPINDLE ORGANIZATION                                                                                                                                                            | 19  | 0.638296 | 1.834773 | <0.0001  | 0.023848 |
| GO OXIDOREDUCTASE ACTIVITY ACTING ON THE CH NH GROUP OF DONORS NAD OR NADP AS ACCEPTOR                                                                                                           | 16  | 0.605585 | 1.833589 | 0.004008 | 0.024072 |
| GO RESPONSE TO X RAY                                                                                                                                                                             | 30  | 0.577522 | 1.83339  | 0.002028 | 0.024053 |
| GO SAGA TYPE COMPLEX                                                                                                                                                                             | 30  | 0.565796 | 1.831048 | 0.00641  | 0.024511 |
| GO GENE SILENCING BY RNA                                                                                                                                                                         | 128 | 0.520093 | 1.828089 | 0.004057 | 0.025175 |
| GO MITOCHONDRIAL RNA METABOLIC PROCESS                                                                                                                                                           | 23  | 0.641993 | 1.825639 | 0.007968 | 0.025692 |
| GO CEREBRAL CORTEX DEVELOPMENT                                                                                                                                                                   | 103 | 0.457922 | 1.8217   | <0.0001  | 0.02664  |
| GO RNA STABILIZATION                                                                                                                                                                             | 29  | 0.579155 | 1.820595 | 0.00818  | 0.026827 |
| GO CLEAVAGE INVOLVED IN RRNA PROCESSING                                                                                                                                                          | 19  | 0.689687 | 1.818022 | 0.004107 | 0.027386 |
| GO RESPONSE TO RADIATION                                                                                                                                                                         | 387 | 0.362234 | 1.817479 | <0.0001  | 0.027487 |
| GO CELL AGING                                                                                                                                                                                    | 66  | 0.454905 | 1.817015 | <0.0001  | 0.02752  |
| GO HISTONE DEACETYLASE BINDING                                                                                                                                                                   | 102 | 0.439297 | 1.815694 | 0.01002  | 0.027726 |
| GO RESPONSE TO HEAT                                                                                                                                                                              | 85  | 0.441508 | 1.814727 | <0.0001  | 0.027903 |
| GO REGULATION OF MITOPHAGY                                                                                                                                                                       | 40  | 0.482817 | 1.810389 | <0.0001  | 0.029025 |
| GO CHROMATIN ASSEMBLY OR DISASSEMBLY                                                                                                                                                             | 155 | 0.566448 | 1.808385 | 0.012    | 0.029564 |
| GO TELOMERIC DNA BINDING                                                                                                                                                                         | 28  | 0.595841 | 1.806751 | 0.008264 | 0.030012 |
| GO RESPONSE TO UV                                                                                                                                                                                | 119 | 0.418879 | 1.806737 | <0.0001  | 0.029938 |
| GO NUCLEOSOMAL DNA BINDING                                                                                                                                                                       | 29  | 0.614415 | 1.806138 | 0.010204 | 0.030008 |
| GO FOLIC ACID CONTAINING COMPOUND METABOLIC PROCESS                                                                                                                                              | 27  | 0.582835 | 1.805726 | 0.004237 | 0.030052 |
| GO NEGATIVE REGULATION OF CELL AGING                                                                                                                                                             | 16  | 0.632737 | 1.804551 | 0.008368 | 0.030292 |
| GO INO80 TYPE COMPLEX                                                                                                                                                                            | 21  | 0.60723  | 1.804072 | 0.002066 | 0.030324 |
| GO NEGATIVE REGULATION OF TELOMERE MAINTENANCE                                                                                                                                                   | 26  | 0.58631  | 1.804044 | 0.009921 | 0.030251 |
| GO PRERIBOSOME                                                                                                                                                                                   | 58  | 0.627094 | 1.803694 | 0.012295 | 0.030266 |
| GO REGULATION OF PROTEIN UBIQUITINATION INVOLVED IN UBIQUITIN DEPENDENT PROTEIN CATABOLIC PROCESS                                                                                                | 101 | 0.537812 | 1.802484 | 0.00409  | 0.030526 |
| GO ESTABLISHMENT OF SPINDLE ORIENTATION                                                                                                                                                          | 24  | 0.588106 | 1.798344 | 0.01004  | 0.031628 |
| GO OXIDOREDUCTASE ACTIVITY ACTING ON PAIRED DONORS WITH INCORPORATION OR REDUCTION OF MOLECULAR OXYGEN 2 OXOGLUTARATE AS ONE DONOR AND INCORPORATION OF ONE ATOM EACH OF OXYGEN INTO BOTH DONORS | 38  | 0.518082 | 1.79786  | 0.006237 | 0.031682 |
| GO NEGATIVE REGULATION OF GENE SILENCING                                                                                                                                                         | 18  | 0.586601 | 1.796649 | 0.004175 | 0.031979 |
| GO POSITIVE REGULATION OF TELOMERASE                                                                                                                                                             | 27  | 0.527978 | 1.795541 | 0.009804 | 0.032224 |

| ACTIVITY                                                                               |     |          |          |          |          |
|----------------------------------------------------------------------------------------|-----|----------|----------|----------|----------|
| GO RNA POLYMERASE COMPLEX                                                              | 118 | 0.486551 | 1.794492 | 0.006186 | 0.032466 |
| GO ESC E Z COMPLEX                                                                     | 16  | 0.678413 | 1.7924   | 0.008658 | 0.033015 |
| GO POSTTRANSCRIPTIONAL REGULATION OF GENE EXPRESSION                                   | 417 | 0.410785 | 1.79141  | 0.004184 | 0.033214 |
| GO PROTEIN PHOSPHATASE BINDING                                                         | 117 | 0.407577 | 1.791014 | 0.002062 | 0.033223 |
| GO POSITIVE REGULATION OF CELL CYCLE G1 S PHASE TRANSITION                             | 28  | 0.546467 | 1.789346 | 0.004219 | 0.033686 |
| GO POSITIVE REGULATION OF RESPONSE TO DNA DAMAGE STIMULUS                              | 58  | 0.469998 | 1.78797  | <0.0001  | 0.03402  |
| GO RNA POLYMERASE CORE ENZYME BINDING                                                  | 19  | 0.612397 | 1.787954 | 0.004032 | 0.033939 |
| GO REGULATION OF LIGASE ACTIVITY                                                       | 126 | 0.521045 | 1.787589 | 0.00616  | 0.033958 |
| GO MATURATION OF 5 8S RRNA                                                             | 28  | 0.642094 | 1.787453 | 0.022449 | 0.033928 |
| GO GLUCOSYLTRANSFERASE ACTIVITY                                                        | 16  | 0.654954 | 1.787037 | 0.012024 | 0.033978 |
| GO PROTEASOMAL PROTEIN CATABOLIC PROCESS                                               | 263 | 0.433438 | 1.78677  | 0.002101 | 0.033963 |
| GO PROTEIN C TERMINUS BINDING                                                          | 182 | 0.379622 | 1.786564 | 0.002075 | 0.033959 |
| GO PROTEIN POLYUBIQUITINATION                                                          | 234 | 0.423322 | 1.783803 | <0.0001  | 0.03473  |
| GO PALLIUM DEVELOPMENT                                                                 | 148 | 0.431592 | 1.783653 | 0.002066 | 0.03469  |
| GO REGULATION OF CHROMATIN ORGANIZATION                                                | 146 | 0.418252 | 1.783644 | 0.004167 | 0.034611 |
| GO REGULATION OF TRANSCRIPTION FROM RNA POLYMERASE I PROMOTER                          | 23  | 0.59403  | 1.783627 | 0.005988 | 0.034529 |
| GO XY BODY                                                                             | 15  | 0.653156 | 1.783359 | 0.006098 | 0.034553 |
| GO TRNA BINDING                                                                        | 43  | 0.569248 | 1.783061 | 0.008163 | 0.034565 |
| GO CELLULAR COMPONENT DISASSEMBLY                                                      | 488 | 0.388554 | 1.782927 | 0.004124 | 0.034512 |
| GO AMINO ACID ACTIVATION                                                               | 51  | 0.594877 | 1.782845 | 0.02     | 0.034437 |
| GO LIGASE ACTIVITY FORMING CARBON OXYGEN BONDS                                         | 44  | 0.593745 | 1.777014 | 0.013944 | 0.036248 |
| GO NEGATIVE REGULATION OF CELL CYCLE G1 S PHASE TRANSITION                             | 92  | 0.423099 | 1.776326 | 0.002004 | 0.036369 |
| GO APOPTOTIC NUCLEAR CHANGES                                                           | 24  | 0.553531 | 1.776237 | 0.006329 | 0.036327 |
| GO POSITIVE REGULATION OF NEURON DEATH                                                 | 66  | 0.451662 | 1.776029 | 0.001961 | 0.036288 |
| GO REGULATION OF RETINOIC ACID RECEPTOR SIGNALING PATHWAY                              | 16  | 0.593088 | 1.775504 | 0.002012 | 0.03636  |
| GO REGULATION OF HISTONE METHYLATION                                                   | 51  | 0.523337 | 1.774247 | 0.006073 | 0.036703 |
| GO GENE SILENCING                                                                      | 183 | 0.487875 | 1.773266 | 0.01626  | 0.036947 |
| GO POSITIVE REGULATION OF PROTEIN MODIFICATION BY SMALL PROTEIN CONJUGATION OR REMOVAL | 185 | 0.444973 | 1.772933 | 0.006224 | 0.036959 |
| GO PROTEASOME BINDING                                                                  | 16  | 0.644995 | 1.770949 | 0.010163 | 0.037481 |
| GO POSITIVE REGULATION OF HISTONE METHYLATION                                          | 29  | 0.554896 | 1.770422 | 0.004124 | 0.037589 |
| GO PROTEIN SERINE THREONINE KINASE ACTIVITY                                            | 425 | 0.366917 | 1.768459 | <0.0001  | 0.038122 |
| GO PROTEIN IMPORT INTO NUCLEUS TRANSLOCATION                                           | 28  | 0.514191 | 1.768199 | 0.001965 | 0.038114 |
| GO AXON CYTOPLASM                                                                      | 29  | 0.539711 | 1.766658 | 0.008351 | 0.038521 |
| GO N ACETYLTRANSFERASE ACTIVITY                                                        | 76  | 0.463594 | 1.765644 | 0.004211 | 0.038768 |

|                                                                         |     |          |          |          |          |
|-------------------------------------------------------------------------|-----|----------|----------|----------|----------|
| GO 3 5 EXONUCLEASE ACTIVITY                                             | 44  | 0.495949 | 1.76459  | 0.004292 | 0.03904  |
| GO PEPTIDYL SERINE MODIFICATION                                         | 146 | 0.395281 | 1.7628   | <0.0001  | 0.039583 |
| GO TRNA PROCESSING                                                      | 106 | 0.516662 | 1.762798 | 0.021696 | 0.039491 |
| GO REGULATION OF PROTEIN CATABOLIC PROCESS                              | 376 | 0.381468 | 1.762529 | <0.0001  | 0.039483 |
| GO NEGATIVE REGULATION OF MRNA METABOLIC PROCESS                        | 34  | 0.558685 | 1.759989 | 0.004098 | 0.040275 |
| GO REGULATION OF CELLULAR SENESCENCE                                    | 26  | 0.55267  | 1.759684 | 0.008421 | 0.040303 |
| GO PEPTIDE N ACETYLTRANSFERASE ACTIVITY                                 | 58  | 0.493388 | 1.756889 | 0.010526 | 0.041229 |
| GO LIGASE ACTIVITY FORMING CARBON NITROGEN BONDS                        | 52  | 0.499128 | 1.755615 | 0.004149 | 0.041599 |
| GO REGULATION OF GENE EXPRESSION EPIGENETIC                             | 202 | 0.468252 | 1.754901 | 0.016032 | 0.041745 |
| GO NUCLEAR CHROMATIN                                                    | 275 | 0.439152 | 1.753116 | 0.006098 | 0.042304 |
| GO OOCYTE MATURATION                                                    | 17  | 0.576679 | 1.751095 | 0.006383 | 0.043038 |
| GO NUCLEAR TRANSCRIPTIONAL REPRESSOR COMPLEX                            | 22  | 0.605594 | 1.750897 | 0.012579 | 0.043017 |
| GO POSITIVE REGULATION OF CELLULAR PROTEIN CATABOLIC PROCESS            | 185 | 0.429115 | 1.74917  | 0.004073 | 0.043564 |
| GO LIGAND DEPENDENT NUCLEAR RECEPTOR TRANSCRIPTION COACTIVATOR ACTIVITY | 51  | 0.468999 | 1.748208 | 0.012474 | 0.043829 |
| GO CHD TYPE COMPLEX                                                     | 17  | 0.641239 | 1.747277 | 0.020121 | 0.044087 |
| GO RNA PHOSPHODIESTER BOND HYDROLYSIS ENDONUCLEOLYTIC                   | 54  | 0.500068 | 1.746873 | 0.012245 | 0.04412  |
| GO NUCLEOID                                                             | 39  | 0.607604 | 1.74565  | 0.014199 | 0.04443  |
| GO NEGATIVE REGULATION OF HISTONE MODIFICATION                          | 35  | 0.519433 | 1.745242 | 0.019068 | 0.044504 |
| GO LIGASE ACTIVITY                                                      | 375 | 0.380547 | 1.744227 | 0.002114 | 0.044762 |
| GO N ACYLTRANSFERASE ACTIVITY                                           | 92  | 0.437785 | 1.74394  | 0.004264 | 0.044782 |
| GO RNA POLYMERASE II CORE BINDING                                       | 15  | 0.64141  | 1.743722 | 0.006061 | 0.044753 |
| GO REGULATION OF HISTONE H3 K9 METHYLATION                              | 17  | 0.641086 | 1.742544 | 0.01217  | 0.045101 |
| GO REGULATION OF RNA SPLICING                                           | 92  | 0.469625 | 1.741095 | <0.0001  | 0.045511 |
| GO RNA POLYMERASE II TRANSCRIPTION FACTOR COMPLEX                       | 100 | 0.430705 | 1.740693 | 0.00202  | 0.045565 |
| GO PROTEASOME COMPLEX                                                   | 73  | 0.585858 | 1.738807 | 0.020576 | 0.046183 |
| GO REGULATION OF GENE SILENCING                                         | 50  | 0.552785 | 1.735845 | 0.01417  | 0.047258 |
| GO ACETYLTRANSFERASE ACTIVITY                                           | 92  | 0.439301 | 1.73524  | 0.00431  | 0.047439 |
| GO DESMOSOME                                                            | 26  | 0.62161  | 1.733601 | 0.021097 | 0.047943 |
| GO REGULATION OF PROTEIN PHOSPHATASE TYPE 2A ACTIVITY                   | 23  | 0.546366 | 1.732707 | 0.012024 | 0.048198 |
| GO MICROTUBULE BASED MOVEMENT                                           | 192 | 0.439082 | 1.729608 | 0.01417  | 0.049259 |
| GO SMALL NUCLEOLAR RIBONUCLEOPROTEIN COMPLEX                            | 18  | 0.698941 | 1.728988 | 0.014113 | 0.04941  |
| GO CYCLIN DEPENDENT PROTEIN KINASE ACTIVITY                             | 34  | 0.483041 | 1.728626 | 0.008114 | 0.049473 |
| GO PERICENTRIOLAR MATERIAL                                              | 18  | 0.611819 | 1.727773 | 0.018711 | 0.049741 |
| GO DEMETHYLATION                                                        | 51  | 0.462979 | 1.726086 | 0.001934 | 0.050309 |
| GO PYRIMIDINE NUCLEOBASE METABOLIC                                      | 19  | 0.559585 | 1.725858 | 0.00823  | 0.05029  |

| PROCESS                                                                                                         |     |          |          |          |          |
|-----------------------------------------------------------------------------------------------------------------|-----|----------|----------|----------|----------|
| GO POSITIVE REGULATION OF MITOCHONDRIAL OUTER MEMBRANE PERMEABILIZATION INVOLVED IN APOPTOTIC SIGNALING PATHWAY | 36  | 0.518121 | 1.725565 | 0.004008 | 0.050312 |
| GO POSITIVE REGULATION OF VIRAL GENOME REPLICATION                                                              | 29  | 0.508976 | 1.724485 | 0.010846 | 0.050629 |
| GO PCG PROTEIN COMPLEX                                                                                          | 43  | 0.513687 | 1.722924 | 0.011062 | 0.051207 |
| GO CELL PROJECTION CYTOPLASM                                                                                    | 48  | 0.455185 | 1.72224  | 0.004158 | 0.051405 |
| GO TRNA MODIFICATION                                                                                            | 53  | 0.544739 | 1.721648 | 0.022541 | 0.051521 |
| GO RNA POLYMERASE II DISTAL ENHANCER SEQUENCE SPECIFIC DNA BINDING                                              | 61  | 0.453857 | 1.721296 | 0.015123 | 0.051577 |
| GO NUCLEAR EUCHROMATIN                                                                                          | 23  | 0.549064 | 1.721216 | 0.004032 | 0.051501 |
| GO POLY PURINE TRACT BINDING                                                                                    | 18  | 0.636183 | 1.721203 | 0.014523 | 0.051401 |
| GO POSITIVE REGULATION OF LIGASE ACTIVITY                                                                       | 106 | 0.529908 | 1.72118  | 0.014433 | 0.051302 |
| GO TRNA METHYLATION                                                                                             | 20  | 0.5976   | 1.721026 | 0.012097 | 0.051267 |
| GO POSITIVE REGULATION OF DNA REPAIR                                                                            | 33  | 0.529551 | 1.718758 | 0.012097 | 0.052204 |
| GO POSITIVE REGULATION OF CELLULAR PROTEIN LOCALIZATION                                                         | 335 | 0.343776 | 1.7183   | <0.0001  | 0.052305 |
| GO HISTONE UBIQUITINATION                                                                                       | 34  | 0.536641 | 1.716497 | 0.02454  | 0.053043 |
| GO CELLULAR PROTEIN COMPLEX LOCALIZATION                                                                        | 21  | 0.547553 | 1.716102 | 0.00616  | 0.053124 |
| GO HSP90 PROTEIN BINDING                                                                                        | 27  | 0.483502 | 1.714929 | 0.01     | 0.053479 |
| GO ERROR FREE TRANSLESION SYNTHESIS                                                                             | 17  | 0.654881 | 1.714768 | 0.016162 | 0.053445 |
| GO SMALL NUCLEAR RIBONUCLEOPROTEIN COMPLEX                                                                      | 59  | 0.53413  | 1.711769 | 0.023013 | 0.054703 |
| GO PEPTIDYL THREONINE MODIFICATION                                                                              | 44  | 0.485037 | 1.709942 | 0.01378  | 0.055399 |
| GO REGULATION OF PROTEIN INSERTION INTO MITOCHONDRIAL MEMBRANE INVOLVED IN APOPTOTIC SIGNALING PATHWAY          | 29  | 0.52647  | 1.707634 | 0.002033 | 0.056352 |
| GO POSITIVE REGULATION OF NEURON APOPTOTIC PROCESS                                                              | 46  | 0.455744 | 1.705892 | 0.007968 | 0.056966 |
| GO REGULATION OF DNA METHYLATION                                                                                | 15  | 0.640389 | 1.705703 | 0.020408 | 0.056946 |
| GO UBIQUITIN LIKE PROTEIN LIGASE BINDING                                                                        | 255 | 0.370035 | 1.705372 | <0.0001  | 0.056998 |
| GO NUCLEOTIDE EXCISION REPAIR DNA INCISION                                                                      | 39  | 0.541769 | 1.705138 | 0.006211 | 0.056991 |
| GO EXECUTION PHASE OF APOPTOSIS                                                                                 | 53  | 0.436349 | 1.703735 | 0.002128 | 0.057491 |
| GO ANDROGEN RECEPTOR SIGNALING PATHWAY                                                                          | 40  | 0.517774 | 1.702676 | 0.017204 | 0.057906 |
| GO PROTEIN ACETYLATION                                                                                          | 112 | 0.41814  | 1.701586 | 0.016771 | 0.058254 |
| GO AXO DENDRITIC TRANSPORT                                                                                      | 33  | 0.501757 | 1.699614 | 0.010352 | 0.059083 |
| GO HISTONE MONOUBIQUITINATION                                                                                   | 23  | 0.577518 | 1.698593 | 0.026915 | 0.059478 |
| GO CARBOXY TERMINAL DOMAIN PROTEIN KINASE COMPLEX                                                               | 22  | 0.589622 | 1.698421 | 0.01992  | 0.05944  |
| GO NEGATIVE REGULATION OF DNA BIOSYNTHETIC PROCESS                                                              | 30  | 0.502541 | 1.698411 | 0.00789  | 0.059324 |
| GO REGULATION OF CELL MATURATION                                                                                | 18  | 0.558616 | 1.697853 | 0.015238 | 0.059455 |
| GO PROTEIN MODIFICATION BY SMALL                                                                                | 107 | 0.429823 | 1.695193 | 0.017131 | 0.060638 |

|                                                                            |     |          |          |          |          |
|----------------------------------------------------------------------------|-----|----------|----------|----------|----------|
| PROTEIN REMOVAL                                                            |     |          |          |          |          |
| GO PROTEIN TRANSPORTER ACTIVITY                                            | 96  | 0.435064 | 1.695106 | 0.006237 | 0.060559 |
| GO CELLULAR COMPONENT DISASSEMBLY INVOLVED IN EXECUTION PHASE OF APOPTOSIS | 41  | 0.465221 | 1.694488 | 0.002165 | 0.060788 |
| GO RIBOSOME BINDING                                                        | 43  | 0.484631 | 1.693543 | 0.02459  | 0.061139 |
| GO SPLICEOSOMAL COMPLEX ASSEMBLY                                           | 52  | 0.531451 | 1.693248 | 0.023158 | 0.061169 |
| GO RESPONSE TO PLATELET DERIVED GROWTH FACTOR                              | 18  | 0.606853 | 1.692001 | 0.016427 | 0.061609 |
| GO ENDORIBONUCLEASE ACTIVITY                                               | 45  | 0.476362 | 1.690794 | 0.01     | 0.062075 |
| GO REGULATION OF TRANSLATIONAL INITIATION                                  | 79  | 0.470238 | 1.690304 | 0.02449  | 0.062154 |
| GO HISTONE DEMETHYLASE ACTIVITY                                            | 23  | 0.627776 | 1.688996 | 0.026694 | 0.062713 |
| GO DSRNA FRAGMENTATION                                                     | 18  | 0.616727 | 1.68815  | 0.015695 | 0.063039 |
| GO REGULATION OF CELLULAR AMIDE METABOLIC PROCESS                          | 321 | 0.374259 | 1.688124 | 0.010373 | 0.062919 |
| GO FOLIC ACID METABOLIC PROCESS                                            | 17  | 0.57794  | 1.686295 | 0.020921 | 0.063706 |
| GO PURINE NUCLEOBASE METABOLIC PROCESS                                     | 19  | 0.601447 | 1.685386 | 0.025532 | 0.064043 |
| GO RNA MODIFICATION                                                        | 106 | 0.461232 | 1.685052 | 0.025896 | 0.064075 |
| GO ORGAN REGENERATION                                                      | 82  | 0.410953 | 1.683537 | 0.005894 | 0.064742 |
| GO POSITIVE REGULATION OF G1 S TRANSITION OF MITOTIC CELL CYCLE            | 24  | 0.52668  | 1.681583 | 0.004202 | 0.065653 |
| GO TRANSCRIPTIONALLY ACTIVE CHROMATIN                                      | 16  | 0.569552 | 1.679862 | 0.008197 | 0.066387 |
| GO NCRNA METABOLIC PROCESS                                                 | 499 | 0.484679 | 1.679413 | 0.040323 | 0.066456 |
| GO METHYL CPG BINDING                                                      | 15  | 0.600475 | 1.677749 | 0.022869 | 0.067204 |
| GO FEMALE GAMETE GENERATION                                                | 84  | 0.387163 | 1.677052 | 0.002088 | 0.067427 |
| GO NEGATIVE REGULATION OF MRNA SPLICING VIA SPLICEOSOME                    | 19  | 0.624996 | 1.67607  | 0.012474 | 0.067807 |
| GO NUCLEOTIDE EXCISION REPAIR                                              | 111 | 0.461951 | 1.674103 | 0.012526 | 0.068732 |
| GO MAGNESIUM ION BINDING                                                   | 188 | 0.353884 | 1.673683 | 0.002123 | 0.068856 |
| GO NEURAL PRECURSOR CELL PROLIFERATION                                     | 70  | 0.448762 | 1.67129  | 0.011976 | 0.070025 |
| GO POSITIVE REGULATION OF CHROMATIN MODIFICATION                           | 81  | 0.418499 | 1.670909 | 0.010204 | 0.070124 |
| GO PROTEASOME ACCESSORY COMPLEX                                            | 23  | 0.695905 | 1.668222 | 0.018443 | 0.071382 |
| GO CELLULAR RESPONSE TO ESTRADIOL STIMULUS                                 | 28  | 0.513131 | 1.667228 | 0.014463 | 0.071785 |
| GO NEGATIVE REGULATION OF CELLULAR CATABOLIC PROCESS                       | 148 | 0.364522 | 1.666522 | <0.0001  | 0.072023 |
| GO MITOCHONDRIAL MEMBRANE ORGANIZATION                                     | 90  | 0.449344 | 1.664287 | 0.01992  | 0.073054 |
| GO MATURATION OF SSU RRNA                                                  | 40  | 0.596838 | 1.658933 | 0.030738 | 0.075963 |
| GO NEGATIVE REGULATION OF RESPONSE TO DNA DAMAGE STIMULUS                  | 49  | 0.423146 | 1.658304 | 0.008114 | 0.076166 |
| GO DNA DIRECTED RNA POLYMERASE II HOLOENZYME                               | 93  | 0.448119 | 1.6575   | 0.024341 | 0.076492 |
| GO DNA METHYLATION OR DEMETHYLATION                                        | 56  | 0.455769 | 1.654925 | 0.022917 | 0.077783 |
| GO ESTABLISHMENT OF MITOTIC SPINDLE ORIENTATION                            | 19  | 0.562116 | 1.653455 | 0.018182 | 0.078422 |
| GO CELLULAR RESPONSE TO UV                                                 | 65  | 0.41634  | 1.653069 | 0.016194 | 0.07848  |



|                                                                                                        |     |          |          |          |          |
|--------------------------------------------------------------------------------------------------------|-----|----------|----------|----------|----------|
| GO DNA BINDING BENDING                                                                                 | 19  | 0.556546 | 1.651186 | 0.01165  | 0.079509 |
| GO CELLULAR RESPONSE TO ESTROGEN STIMULUS                                                              | 38  | 0.451561 | 1.6502   | 0.016393 | 0.079957 |
| GO REGULATION OF MITOCHONDRIAL OUTER MEMBRANE PERMEABILIZATION INVOLVED IN APOPTOTIC SIGNALING PATHWAY | 42  | 0.479111 | 1.649638 | 0.011742 | 0.080119 |
| GO UBIQUITIN LIKE PROTEIN LIGASE ACTIVITY                                                              | 188 | 0.37851  | 1.649326 | 0.006237 | 0.080181 |
| GO ADP BINDING                                                                                         | 31  | 0.476247 | 1.648984 | 0.016495 | 0.080228 |
| GO INTRACELLULAR STEROID HORMONE RECEPTOR SIGNALING PATHWAY                                            | 66  | 0.438883 | 1.648802 | 0.008386 | 0.080198 |
| GO CELLULAR RESPONSE TO ALCOHOL                                                                        | 110 | 0.400376 | 1.64835  | 0.004149 | 0.080303 |
| GO MRNA 3 UTR BINDING                                                                                  | 47  | 0.483866 | 1.648043 | 0.035714 | 0.080331 |
| GO POSITIVE REGULATION OF PROTEIN LOCALIZATION TO NUCLEUS                                              | 126 | 0.377586 | 1.647785 | 0.002088 | 0.080345 |
| GO TRANSCRIPTION FROM RNA POLYMERASE III PROMOTER                                                      | 38  | 0.493837 | 1.647501 | 0.016949 | 0.080366 |
| GO RNA POLYMERASE ACTIVITY                                                                             | 43  | 0.51065  | 1.645742 | 0.024096 | 0.08121  |
| GO CHROMATIN DNA BINDING                                                                               | 76  | 0.437382 | 1.645688 | 0.015936 | 0.081116 |
| GO ALPHA AMINO ACID BIOSYNTHETIC PROCESS                                                               | 73  | 0.452561 | 1.643778 | 0.018634 | 0.082106 |
| GO UNFOLDED PROTEIN BINDING                                                                            | 89  | 0.488486 | 1.642347 | 0.03681  | 0.082809 |
| GO CYTOSKELETON DEPENDENT INTRACELLULAR TRANSPORT                                                      | 109 | 0.396906 | 1.642311 | 0.015873 | 0.082683 |
| GO CYTOPLASMIC EXOSOME RNASE COMPLEX                                                                   | 15  | 0.612582 | 1.642188 | 0.022869 | 0.082622 |
| GO EXOSOME RNASE COMPLEX                                                                               | 21  | 0.566638 | 1.64166  | 0.024194 | 0.082799 |
| GO CHROMATIN DISASSEMBLY                                                                               | 16  | 0.62584  | 1.641423 | 0.034274 | 0.082792 |
| GO BINDING OF SPERM TO ZONA PELLUCIDA                                                                  | 30  | 0.519745 | 1.641179 | 0.012658 | 0.082794 |
| GO NEGATIVE REGULATION OF HISTONE METHYLATION                                                          | 16  | 0.636391 | 1.638989 | 0.026749 | 0.084067 |
| GO RIBONUCLEOPROTEIN GRANULE                                                                           | 139 | 0.397476 | 1.637066 | 0.013015 | 0.08509  |
| GO INCLUSION BODY                                                                                      | 65  | 0.404667 | 1.636662 | 0.01581  | 0.08519  |
| GO HYDROLASE ACTIVITY ACTING ON CARBON NITROGEN BUT NOT PEPTIDE BONDS IN CYCLIC AMIDINES               | 32  | 0.488636 | 1.635353 | 0.03252  | 0.085831 |
| GO METHYLATED HISTONE BINDING                                                                          | 46  | 0.482599 | 1.635293 | 0.025532 | 0.085706 |
| GO REGULATION OF MRNA 3 END PROCESSING                                                                 | 26  | 0.545129 | 1.633913 | 0.034908 | 0.086188 |
| GO NEGATIVE REGULATION OF RNA SPLICING                                                                 | 24  | 0.575723 | 1.633337 | 0.018443 | 0.086422 |
| GO TOR SIGNALING                                                                                       | 16  | 0.55784  | 1.632981 | 0.033195 | 0.086471 |
| GO ACID AMINO ACID LIGASE ACTIVITY                                                                     | 19  | 0.524982 | 1.632263 | 0.021912 | 0.086749 |
| GO PROTEIN DEALKYLATION                                                                                | 26  | 0.546552 | 1.629428 | 0.024691 | 0.08839  |
| GO RNA METHYLATION                                                                                     | 45  | 0.493269 | 1.629373 | 0.027833 | 0.088267 |
| GO TRANSCRIPTION FACTOR COMPLEX                                                                        | 288 | 0.347448 | 1.628983 | 0.008214 | 0.088328 |
| GO TRANSCRIPTION FROM RNA POLYMERASE I PROMOTER                                                        | 34  | 0.519463 | 1.628567 | 0.034951 | 0.088448 |
| GO MULTICELLULAR ORGANISM GROWTH                                                                       | 75  | 0.410357 | 1.628489 | 0.019608 | 0.08835  |
| GO POLYSOME                                                                                            | 38  | 0.519257 | 1.628345 | 0.035417 | 0.088283 |
| GO SIN3 TYPE COMPLEX                                                                                   | 16  | 0.614028 | 1.627947 | 0.036403 | 0.088389 |
| GO SYNAPTONEMAL COMPLEX ORGANIZATION                                                                   | 18  | 0.5567   | 1.627094 | 0.035941 | 0.088852 |
| GO NCRNA CATABOLIC PROCESS                                                                             | 22  | 0.53646  | 1.626228 | 0.026258 | 0.089214 |

|                                                                       |     |          |          |          |          |
|-----------------------------------------------------------------------|-----|----------|----------|----------|----------|
| GO DNA DAMAGE RESPONSE SIGNAL TRANSDUCTION RESULTING IN TRANSCRIPTION | 15  | 0.552918 | 1.625246 | 0.02454  | 0.089754 |
| GO MITOCHONDRIAL GENOME MAINTENANCE                                   | 20  | 0.516461 | 1.623295 | 0.026316 | 0.090831 |
| GO RNA SPLICING VIA ENDONUCLEOLYTIC CLEAVAGE AND LIGATION             | 15  | 0.617744 | 1.622264 | 0.029046 | 0.091297 |
| GO REGULATION OF MAMMARY GLAND EPITHELIAL CELL PROLIFERATION          | 16  | 0.55494  | 1.620239 | 0.033543 | 0.09246  |
| GO MICROTUBULE NUCLEATION                                             | 18  | 0.557829 | 1.618936 | 0.026694 | 0.093183 |
| GO REGULATION OF MEMBRANE PERMEABILITY                                | 69  | 0.430321 | 1.618074 | 0.02004  | 0.093568 |
| GO P53 BINDING                                                        | 66  | 0.410499 | 1.618068 | 0.015414 | 0.093408 |
| GO GLUTAMINE METABOLIC PROCESS                                        | 22  | 0.528355 | 1.61689  | 0.036325 | 0.09404  |
| GO RRNA CATABOLIC PROCESS                                             | 17  | 0.555383 | 1.616809 | 0.027837 | 0.093928 |
| GO TRANSCRIPTION FACTOR TFIID COMPLEX                                 | 23  | 0.529721 | 1.615166 | 0.033755 | 0.094843 |
| GO ORGANELLE TRANSPORT ALONG MICROTUBULE                              | 54  | 0.435048 | 1.614964 | 0.016667 | 0.094823 |
| GO EXON EXON JUNCTION COMPLEX                                         | 20  | 0.564771 | 1.614485 | 0.024742 | 0.095027 |
| GO RESPONSE TO GONADOTROPIN                                           | 26  | 0.504191 | 1.612787 | 0.028571 | 0.095851 |
| GO PROTEIN KINASE C BINDING                                           | 47  | 0.426233 | 1.61239  | 0.022495 | 0.096002 |
| GO WIDE PORE CHANNEL ACTIVITY                                         | 22  | 0.523549 | 1.612131 | 0.023305 | 0.096041 |
| GO NUCLEAR INNER MEMBRANE                                             | 45  | 0.418954 | 1.610805 | 0.020534 | 0.096594 |
| GO HORMONE RECEPTOR BINDING                                           | 146 | 0.363517 | 1.610159 | 0.012474 | 0.096867 |
| GO MODULATION BY VIRUS OF HOST MORPHOLOGY OR PHYSIOLOGY               | 36  | 0.463727 | 1.608897 | 0.025263 | 0.097496 |
| GO POLYUBIQUITIN BINDING                                              | 38  | 0.457441 | 1.608217 | 0.023061 | 0.097797 |
| GO REGULATION OF MICROTUBULE POLYMERIZATION                           | 31  | 0.470797 | 1.606227 | 0.014403 | 0.099032 |
| GO TRANSLATION INITIATION FACTOR BINDING                              | 27  | 0.516101 | 1.605989 | 0.044625 | 0.098845 |
| GO NITROGEN COMPOUND TRANSPORT                                        | 476 | 0.325319 | 1.605925 | 0.00207  | 0.098733 |
| GO REGULATION OF ALTERNATIVE MRNA SPLICING VIA SPLICEOSOME            | 34  | 0.496063 | 1.604572 | 0.027368 | 0.099342 |
| GO ALDITOL METABOLIC PROCESS                                          | 18  | 0.571724 | 1.603562 | 0.042596 | 0.099829 |
| GO SNRNA BINDING                                                      | 33  | 0.496187 | 1.603515 | 0.047131 | 0.099689 |
| GO DEMETHYLASE ACTIVITY                                               | 31  | 0.522996 | 1.603114 | 0.03373  | 0.099774 |
| GO PHOSPHATASE BINDING                                                | 159 | 0.347101 | 1.603099 | 0.010246 | 0.099616 |
| GO PROTEIN KINASE COMPLEX                                             | 88  | 0.394083 | 1.601629 | 0.019027 | 0.100446 |
| GO REGULATION OF HISTONE H3 K4 METHYLATION                            | 24  | 0.537702 | 1.601139 | 0.037422 | 0.100615 |
| GO POSITIVE REGULATION OF RNA SPLICING                                | 22  | 0.530222 | 1.600834 | 0.030928 | 0.100632 |
| GO OOCYTE DIFFERENTIATION                                             | 34  | 0.456057 | 1.599409 | 0.024845 | 0.101216 |
| GO N TERMINAL PROTEIN AMINO ACID MODIFICATION                         | 24  | 0.494629 | 1.598458 | 0.031042 | 0.101721 |
| GO PROTEIN ACYLATION                                                  | 142 | 0.368566 | 1.597997 | 0.021598 | 0.101865 |
| GO U12 TYPE SPLICEOSOMAL COMPLEX                                      | 25  | 0.577243 | 1.597785 | 0.048729 | 0.101807 |
| GO APOPTOTIC DNA FRAGMENTATION                                        | 15  | 0.548178 | 1.593512 | 0.045549 | 0.104679 |
| GO ANATOMICAL STRUCTURE ARRANGEMENT                                   | 17  | 0.564604 | 1.593129 | 0.038855 | 0.104758 |
| GO PRODUCTION OF MOLECULAR MEDIATOR                                   | 57  | 0.423097 | 1.592583 | 0.027778 | 0.104969 |

|                                                                                 |     |          |          |          |          |
|---------------------------------------------------------------------------------|-----|----------|----------|----------|----------|
| OF IMMUNE RESPONSE                                                              |     |          |          |          |          |
| GO CRANIAL NERVE MORPHOGENESIS                                                  | 23  | 0.537322 | 1.591606 | 0.041841 | 0.105475 |
| GO DNA CATABOLIC PROCESS<br>ENDONUCLEOLYTIC                                     | 18  | 0.516798 | 1.590975 | 0.036093 | 0.105704 |
| GO IN UTERO EMBRYONIC DEVELOPMENT                                               | 301 | 0.337014 | 1.589694 | 0.004073 | 0.106405 |
| GO HISTONE H4 ACETYLTATION                                                      | 42  | 0.455196 | 1.589017 | 0.036585 | 0.106716 |
| GO ADENYLYLTRANSFERASE ACTIVITY                                                 | 24  | 0.489131 | 1.589009 | 0.044872 | 0.106545 |
| GO UBIQUITIN LIGASE COMPLEX                                                     | 247 | 0.351935 | 1.58773  | 0.012397 | 0.107081 |
| GO POSITIVE REGULATION OF PROTEASOMAL<br>PROTEIN CATABOLIC PROCESS              | 95  | 0.378961 | 1.586071 | 0.010246 | 0.107737 |
| GO POSITIVE REGULATION OF PROTEIN<br>CATABOLIC PROCESS                          | 253 | 0.360262 | 1.585804 | 0.016667 | 0.107782 |
| GO MACROMOLECULE METHYLATION                                                    | 171 | 0.384751 | 1.58409  | 0.012712 | 0.108626 |
| GO ANATOMICAL STRUCTURE HOMEOSTASIS                                             | 263 | 0.334782 | 1.58334  | <0.0001  | 0.108968 |
| GO ORGANELLE ASSEMBLY                                                           | 450 | 0.350489 | 1.582516 | 0.01833  | 0.109373 |
| GO NF KAPPAB BINDING                                                            | 30  | 0.47285  | 1.581748 | 0.03397  | 0.10975  |
| GO PYRIMIDINE NUCLEOSIDE TRIPHOSPHATE<br>BIOSYNTHETIC PROCESS                   | 17  | 0.56249  | 1.581052 | 0.035417 | 0.110043 |
| GO RESPONSE TO CAFFEINE                                                         | 17  | 0.519854 | 1.580823 | 0.037182 | 0.110045 |
| GO REGULATION OF DNA BINDING                                                    | 92  | 0.376367 | 1.580106 | 0.01222  | 0.110373 |
| GO CUL4 RING E3 UBIQUITIN LIGASE COMPLEX                                        | 25  | 0.510485 | 1.580047 | 0.033403 | 0.110227 |
| GO RIBONUCLEASE ACTIVITY                                                        | 86  | 0.40584  | 1.577534 | 0.045267 | 0.111907 |
| GO TBP CLASS PROTEIN BINDING                                                    | 20  | 0.546808 | 1.577258 | 0.029106 | 0.111764 |
| GO REGULATION OF RECEPTOR BIOSYNTHETIC<br>PROCESS                               | 21  | 0.498902 | 1.576915 | 0.022869 | 0.111853 |
| GO REGULATION OF MEIOTIC CELL CYCLE                                             | 38  | 0.448704 | 1.576612 | 0.020921 | 0.111895 |
| GO CULLIN RING UBIQUITIN LIGASE COMPLEX                                         | 139 | 0.357735 | 1.575633 | 0.012371 | 0.112436 |
| GO PROTEIN N TERMINUS BINDING                                                   | 101 | 0.372243 | 1.575054 | 0.016913 | 0.112537 |
| GO TRNA METHYLTRANSFERASE ACTIVITY                                              | 18  | 0.545286 | 1.57465  | 0.045635 | 0.112684 |
| GO METENCEPHALON DEVELOPMENT                                                    | 99  | 0.42598  | 1.57444  | 0.016529 | 0.112655 |
| GO SYMPATHETIC NERVOUS SYSTEM<br>DEVELOPMENT                                    | 21  | 0.540659 | 1.574432 | 0.03681  | 0.112485 |
| GO TELOMERE MAINTENANCE VIA TELOMERE<br>LENGTHENING                             | 24  | 0.499055 | 1.573398 | 0.044    | 0.113164 |
| GO REGULATION OF ANOIKIS                                                        | 24  | 0.483519 | 1.57306  | 0.029644 | 0.113207 |
| GO ANTEROGRADE AXONAL TRANSPORT                                                 | 22  | 0.502584 | 1.572573 | 0.035417 | 0.113386 |
| GO CYTOPLASMIC STRESS GRANULE                                                   | 31  | 0.511792 | 1.572486 | 0.043668 | 0.113283 |
| GO DNA MODIFICATION                                                             | 76  | 0.390364 | 1.572112 | 0.034137 | 0.113383 |
| GO REGULATION OF TRANSCRIPTION<br>ELONGATION FROM RNA POLYMERASE II<br>PROMOTER | 20  | 0.514785 | 1.572043 | 0.034413 | 0.113263 |
| GO RNA PHOSPHODIESTER BOND HYDROLYSIS<br>EXONUCLEOLYTIC                         | 33  | 0.474597 | 1.568199 | 0.042373 | 0.11577  |
| GO GAMETE GENERATION                                                            | 488 | 0.316273 | 1.567451 | 0.002151 | 0.11611  |
| GO RNA POLYMERASE BINDING                                                       | 32  | 0.468837 | 1.567138 | 0.040486 | 0.116138 |
| GO REGULATION OF GENE EXPRESSION BY<br>GENETIC IMPRINTING                       | 15  | 0.579103 | 1.563112 | 0.040568 | 0.118865 |
| GO REGULATION OF MYELINATION                                                    | 29  | 0.469328 | 1.560832 | 0.023762 | 0.120312 |
| GO OOGENESIS                                                                    | 57  | 0.394052 | 1.560476 | 0.012245 | 0.120387 |

|                                                                                      |     |          |          |          |          |
|--------------------------------------------------------------------------------------|-----|----------|----------|----------|----------|
| GO CELLULAR RESPONSE TO LIGHT STIMULUS                                               | 86  | 0.369324 | 1.560463 | 0.012097 | 0.120219 |
| GO EMBRYONIC PLACENTA DEVELOPMENT                                                    | 82  | 0.396865 | 1.558775 | 0.024096 | 0.120835 |
| GO PROTEIN FOLDING                                                                   | 201 | 0.40299  | 1.55825  | 0.047521 | 0.121085 |
| GO DNA ALKYLATION                                                                    | 42  | 0.471771 | 1.556764 | 0.046025 | 0.122102 |
| GO NEGATIVE REGULATION OF CELLULAR AMIDE METABOLIC PROCESS                           | 119 | 0.37952  | 1.551532 | 0.015054 | 0.125722 |
| GO COP9 SIGNALOSOME                                                                  | 31  | 0.451412 | 1.551347 | 0.02988  | 0.125656 |
| GO INTRINSIC APOPTOTIC SIGNALING PATHWAY IN RESPONSE TO ENDOPLASMIC RETICULUM STRESS | 28  | 0.468023 | 1.54975  | 0.041096 | 0.12675  |
| GO CELLULAR SENESCENCE                                                               | 32  | 0.440978 | 1.549348 | 0.040936 | 0.126876 |
| GO REGULATION OF PROTEIN IMPORT INTO NUCLEUS TRANSLOCATION                           | 21  | 0.470472 | 1.548561 | 0.04008  | 0.127121 |
| GO MALE GAMETE GENERATION                                                            | 392 | 0.320675 | 1.54443  | 0.008386 | 0.130123 |
| GO PROTEIN K48 LINKED UBIQUITINATION                                                 | 45  | 0.428311 | 1.542981 | 0.042254 | 0.131215 |
| GO PTERIDINE CONTAINING COMPOUND BIOSYNTHETIC PROCESS                                | 16  | 0.606068 | 1.54201  | 0.047521 | 0.131844 |
| GO GLUCOSE 6 PHOSPHATE METABOLIC PROCESS                                             | 21  | 0.547287 | 1.541852 | 0.04277  | 0.13179  |
| GO NEGATIVE REGULATION OF CATABOLIC PROCESS                                          | 193 | 0.318975 | 1.541159 | 0.002058 | 0.132167 |
| GO REGULATION OF INTERFERON BETA PRODUCTION                                          | 43  | 0.44405  | 1.540874 | 0.041257 | 0.132014 |
| GO INTRINSIC APOPTOTIC SIGNALING PATHWAY                                             | 147 | 0.328652 | 1.54077  | 0.008247 | 0.131712 |
| GO PYRUVATE METABOLIC PROCESS                                                        | 59  | 0.437057 | 1.54002  | 0.046122 | 0.132129 |
| GO TRANSFERASE ACTIVITY TRANSFERRING PENTOSYL GROUPS                                 | 51  | 0.39998  | 1.539424 | 0.033543 | 0.132432 |
| GO REGULATION OF TRANSCRIPTION FROM RNA POLYMERASE III PROMOTER                      | 20  | 0.481001 | 1.538624 | 0.048583 | 0.13293  |
| GO POSITIVE REGULATION OF TRANSCRIPTION INITIATION FROM RNA POLYMERASE II PROMOTER   | 17  | 0.513009 | 1.53841  | 0.042424 | 0.132924 |
| GO MICROTUBULE POLYMERIZATION                                                        | 26  | 0.457684 | 1.537219 | 0.034836 | 0.133543 |
| GO GAMMA TUBULIN BINDING                                                             | 23  | 0.446165 | 1.534939 | 0.034413 | 0.135039 |
| GO RNA METHYLTRANSFERASE ACTIVITY                                                    | 38  | 0.480636 | 1.534902 | 0.040816 | 0.13487  |
| GO UBIQUITIN LIKE PROTEIN TRANSFERASE ACTIVITY                                       | 394 | 0.323678 | 1.534068 | 0.020661 | 0.135427 |
| GO POSITIVE REGULATION OF PROTEOLYSIS                                                | 349 | 0.335386 | 1.529676 | 0.02863  | 0.138917 |
| GO SINGLE FERTILIZATION                                                              | 92  | 0.369086 | 1.528726 | 0.019802 | 0.139496 |
| GO DEVELOPMENTAL PROGRAMMED CELL DEATH                                               | 26  | 0.478741 | 1.526705 | 0.026804 | 0.140663 |
| GO POSITIVE REGULATION OF TELOMERE CAPPING                                           | 15  | 0.510929 | 1.523399 | 0.048485 | 0.142852 |
| GO CORE PROMOTER SEQUENCE SPECIFIC DNA BINDING                                       | 99  | 0.362366 | 1.518946 | 0.020704 | 0.146452 |
| GO REGULATION OF CIRCADIAN RHYTHM                                                    | 94  | 0.364781 | 1.516516 | 0.020661 | 0.148004 |
| GO REGULATION OF ESTABLISHMENT OF PROTEIN LOCALIZATION TO MITOCHONDRION              | 120 | 0.33891  | 1.513953 | 0.014768 | 0.149782 |

|                                                                              |     |          |          |          |          |
|------------------------------------------------------------------------------|-----|----------|----------|----------|----------|
| GO CRANIAL NERVE DEVELOPMENT                                                 | 42  | 0.435581 | 1.512836 | 0.035124 | 0.150589 |
| GO AGGRESOME                                                                 | 30  | 0.413069 | 1.507019 | 0.023669 | 0.154513 |
| GO POSITIVE REGULATION OF DNA<br>TEMPLATED TRANSCRIPTION INITIATION          | 24  | 0.472285 | 1.506019 | 0.035865 | 0.154774 |
| GO RESPONSE TO ESTRADIOL                                                     | 143 | 0.328843 | 1.504607 | 0.012397 | 0.155603 |
| GO HIPPOCAMPUS DEVELOPMENT                                                   | 70  | 0.384394 | 1.503733 | 0.028571 | 0.156161 |
| GO RESPONSE TO DSRNA                                                         | 54  | 0.391743 | 1.501191 | 0.049896 | 0.158293 |
| GO POSITIVE REGULATION OF PEPTIDYL<br>THREONINE PHOSPHORYLATION              | 24  | 0.472836 | 1.499517 | 0.045635 | 0.159734 |
| GO CELLULAR AMINO ACID BIOSYNTHETIC<br>PROCESS                               | 87  | 0.38629  | 1.499382 | 0.045361 | 0.159638 |
| GO ENHANCER BINDING                                                          | 88  | 0.37271  | 1.491476 | 0.043912 | 0.165269 |
| GO PLACENTA DEVELOPMENT                                                      | 134 | 0.345041 | 1.489867 | 0.028747 | 0.166406 |
| GO INTRINSIC APOPTOTIC SIGNALING<br>PATHWAY IN RESPONSE TO DNA DAMAGE        | 70  | 0.354927 | 1.489228 | 0.01875  | 0.166778 |
| GO STRUCTURAL CONSTITUENT OF<br>CYTOSKELETON                                 | 94  | 0.386527 | 1.488349 | 0.034409 | 0.166923 |
| GO POSITIVE REGULATION OF CYCLIN<br>DEPENDENT PROTEIN KINASE ACTIVITY        | 33  | 0.408751 | 1.484099 | 0.042194 | 0.169859 |
| GO POSITIVE REGULATION OF<br>MITOCHONDRION ORGANIZATION                      | 151 | 0.333508 | 1.483998 | 0.022267 | 0.169749 |
| GO ESTABLISHMENT OF LOCALIZATION BY<br>MOVEMENT ALONG MICROTUBULE            | 90  | 0.369138 | 1.483559 | 0.047244 | 0.169942 |
| GO CELLULAR PROCESS INVOLVED IN<br>REPRODUCTION IN MULTICELLULAR<br>ORGANISM | 212 | 0.315249 | 1.483266 | 0.012526 | 0.170005 |
| GO HEPATICOBILIARY SYSTEM DEVELOPMENT                                        | 126 | 0.342623 | 1.479651 | 0.02     | 0.172014 |
| GO CELLULAR RESPONSE TO NITRIC OXIDE                                         | 15  | 0.491214 | 1.478887 | 0.04931  | 0.172574 |
| GO NEGATIVE REGULATION OF PROTEIN<br>BINDING                                 | 78  | 0.347381 | 1.478556 | 0.022222 | 0.172663 |
| GO SPERM EGG RECOGNITION                                                     | 40  | 0.432847 | 1.475055 | 0.037694 | 0.175981 |
| GO RHYTHMIC PROCESS                                                          | 278 | 0.317623 | 1.472359 | 0.01046  | 0.177916 |
| GO TELENCEPHALON DEVELOPMENT                                                 | 222 | 0.336323 | 1.470762 | 0.03937  | 0.179272 |
| GO OVARIAN FOLLICLE DEVELOPMENT                                              | 55  | 0.363584 | 1.457777 | 0.032854 | 0.189787 |
| GO REGULATION OF NUCLEOCYTOPLASMIC<br>TRANSPORT                              | 214 | 0.309971 | 1.455988 | 0.019763 | 0.191202 |
| GO RESPONSE TO TEMPERATURE STIMULUS                                          | 140 | 0.315911 | 1.454281 | 0.022044 | 0.192775 |
| GO POSITIVE REGULATION OF MICROTUBULE<br>POLYMERIZATION OR DEPOLYMERIZATION  | 22  | 0.455514 | 1.453588 | 0.046939 | 0.193322 |
| GO FERTILIZATION                                                             | 122 | 0.338354 | 1.44801  | 0.016293 | 0.197822 |
| GO RESPONSE TO TESTOSTERONE                                                  | 37  | 0.392696 | 1.444499 | 0.032    | 0.200194 |
| GO REGULATION OF NEURON APOPTOTIC<br>PROCESS                                 | 184 | 0.312847 | 1.443397 | 0.019531 | 0.200978 |
| GO BETA TUBULIN BINDING                                                      | 35  | 0.406344 | 1.440658 | 0.04931  | 0.203208 |
| GO METHYLATION                                                               | 236 | 0.33858  | 1.43943  | 0.049896 | 0.203754 |
| GO POSITIVE REGULATION OF CATABOLIC<br>PROCESS                               | 383 | 0.296921 | 1.439308 | 0.041494 | 0.203645 |
| GO PHOSPHOPROTEIN BINDING                                                    | 59  | 0.358151 | 1.438831 | 0.049485 | 0.20395  |
| GO CELL CYCLE ARREST                                                         | 142 | 0.309409 | 1.43822  | 0.04008  | 0.204054 |

|                                                                  |     |          |          |          |          |
|------------------------------------------------------------------|-----|----------|----------|----------|----------|
| GO HINDBRAIN DEVELOPMENT                                         | 135 | 0.366692 | 1.436938 | 0.045738 | 0.204624 |
| GO MULTICELLULAR ORGANISM AGING                                  | 30  | 0.394195 | 1.432142 | 0.048327 | 0.208692 |
| GO REGULATION OF NEURON DEATH                                    | 240 | 0.299804 | 1.431397 | 0.017308 | 0.208536 |
| GO RNA POLYMERASE II CORE PROMOTER SEQUENCE SPECIFIC DNA BINDING | 53  | 0.368938 | 1.426651 | 0.041322 | 0.212396 |
| GO TRANSCRIPTION COREPRESSOR ACTIVITY                            | 208 | 0.311606 | 1.423678 | 0.040816 | 0.214727 |
| GO MAINTENANCE OF CELL NUMBER                                    | 130 | 0.339352 | 1.423451 | 0.037624 | 0.214721 |
| GO TRANSCRIPTION FACTOR BINDING                                  | 498 | 0.28992  | 1.421787 | 0.020202 | 0.215893 |
| GO NEGATIVE REGULATION OF BINDING                                | 129 | 0.313446 | 1.420904 | 0.021097 | 0.216656 |
| GO CELLULAR RESPONSE TO KETONE                                   | 72  | 0.365326 | 1.41762  | 0.046414 | 0.219163 |
| GO REPRODUCTIVE SYSTEM DEVELOPMENT                               | 390 | 0.290034 | 1.414235 | 0.022044 | 0.222667 |
| GO REGENERATION                                                  | 154 | 0.311328 | 1.411096 | 0.035088 | 0.22594  |
| GO RESPONSE TO LIGHT STIMULUS                                    | 263 | 0.280481 | 1.409458 | 0.034137 | 0.226649 |
| GO AGING                                                         | 256 | 0.292188 | 1.408693 | 0.025292 | 0.226513 |
| GO PROTEIN DEPHOSPHORYLATION                                     | 180 | 0.292287 | 1.403264 | 0.036609 | 0.23125  |
| GO INTRACELLULAR RECEPTOR SIGNALING PATHWAY                      | 160 | 0.311649 | 1.402683 | 0.045267 | 0.231389 |

ES, enrichment score; NES, normalized enrichment score; FDR, false discovery rate; GSEA, gene set enrichment analysis; KIF, kinesin.

**Table SIII. GSEA results of c2 reference gene set of high *KIF14* expression group.**

| Name                                          | Size | ES       | NES      | NOM<br>P-value | FDR<br>q-value |
|-----------------------------------------------|------|----------|----------|----------------|----------------|
| SHEPARD BMYB TARGETS                          | 70   | 0.818884 | 2.664855 | <0.0001        | <0.0001        |
| SHEPARD BMYB MORPHOLINO DN                    | 193  | 0.65088  | 2.578635 | <0.0001        | <0.0001        |
| WHITFIELD CELL CYCLE G2                       | 169  | 0.705651 | 2.570494 | <0.0001        | <0.0001        |
| FLORIO NEOCORTEX BASAL RADIAL GLIA DN         | 187  | 0.85642  | 2.565327 | <0.0001        | <0.0001        |
| CHIANG LIVER CANCER SUBCLASS PROLIFERATION UP | 164  | 0.81638  | 2.562315 | <0.0001        | <0.0001        |
| WHITFIELD CELL CYCLE G2 M                     | 196  | 0.675931 | 2.561875 | <0.0001        | <0.0001        |
| DUTERTRE ESTRADIOL RESPONSE 24HR UP           | 309  | 0.830081 | 2.546488 | <0.0001        | <0.0001        |
| ZHENG GLIOBLASTOMA PLASTICITY UP              | 240  | 0.621794 | 2.535723 | <0.0001        | <0.0001        |
| TOYOTA TARGETS OF MIR34B AND MIR34C           | 409  | 0.665883 | 2.532558 | <0.0001        | <0.0001        |
| WANG RESPONSE TO GSK3 INHIBITOR SB216763 DN   | 332  | 0.675787 | 2.531132 | <0.0001        | <0.0001        |
| SHEPARD CRUSH AND BURN MUTANT DN              | 174  | 0.667064 | 2.518277 | <0.0001        | <0.0001        |
| AFFAR YY1 TARGETS DN                          | 226  | 0.628908 | 2.500055 | <0.0001        | <0.0001        |
| BLUM RESPONSE TO SALIRASIB DN                 | 336  | 0.731556 | 2.498425 | <0.0001        | <0.0001        |
| LINDGREN BLADDER CANCER CLUSTER 1 DN          | 356  | 0.577445 | 2.493411 | <0.0001        | <0.0001        |
| BASAKI YBX1 TARGETS UP                        | 268  | 0.747538 | 2.493154 | <0.0001        | <0.0001        |
| ODONNELL TFRC TARGETS DN                      | 123  | 0.814665 | 2.489543 | <0.0001        | <0.0001        |
| ZHANG TLX TARGETS 60HR DN                     | 263  | 0.831575 | 2.484256 | <0.0001        | <0.0001        |
| DUTERTRE ESTRADIOL RESPONSE 6HR UP            | 218  | 0.613941 | 2.473439 | <0.0001        | <0.0001        |
| LI WILMS TUMOR VS FETAL KIDNEY 1 DN           | 159  | 0.817373 | 2.464465 | <0.0001        | <0.0001        |
| GAVIN FOXP3 TARGETS CLUSTER P6                | 88   | 0.81008  | 2.464099 | <0.0001        | <0.0001        |
| FURUKAWA DUSP6 TARGETS PCI35 DN               | 67   | 0.828011 | 2.464026 | <0.0001        | <0.0001        |
| VILLANUEVA LIVER CANCER KRT19 UP              | 162  | 0.751999 | 2.462688 | <0.0001        | <0.0001        |
| RUIZ TNC TARGETS DN                           | 136  | 0.79689  | 2.462005 | <0.0001        | <0.0001        |
| FERREIRA EWINGS SARCOMA UNSTABLE VS STABLE UP | 148  | 0.779458 | 2.459651 | <0.0001        | <0.0001        |
| MARKEY RBI ACUTE LOF UP                       | 223  | 0.752566 | 2.453993 | <0.0001        | <0.0001        |
| KEGG CELL CYCLE                               | 124  | 0.734303 | 2.453143 | <0.0001        | <0.0001        |
| FOURNIER ACINAR DEVELOPMENT LATE 2            | 265  | 0.749801 | 2.448522 | <0.0001        | <0.0001        |
| CHEMNITZ RESPONSE TO PROSTAGLANDIN E2 UP      | 129  | 0.756192 | 2.442144 | <0.0001        | <0.0001        |
| KAUFFMANN DNA REPLICATION GENES               | 141  | 0.686977 | 2.437814 | <0.0001        | <0.0001        |
| FUJII YBX1 TARGETS DN                         | 193  | 0.781675 | 2.436416 | <0.0001        | <0.0001        |
| MITSIADES RESPONSE TO APLIDIN DN              | 239  | 0.751172 | 2.43588  | <0.0001        | <0.0001        |
| BENPORATH ES 1                                | 356  | 0.657202 | 2.434668 | <0.0001        | <0.0001        |
| SARRIO EPITHELIAL MESENCHYMAL TRANSITION UP   | 171  | 0.7807   | 2.434058 | <0.0001        | <0.0001        |
| VECCHI GASTRIC CANCER EARLY UP                | 384  | 0.693793 | 2.425952 | <0.0001        | <0.0001        |
| FISCHER G2 M CELL CYCLE                       | 220  | 0.768768 | 2.424458 | <0.0001        | <0.0001        |
| CHANG CYCLING GENES                           | 138  | 0.879557 | 2.423594 | <0.0001        | <0.0001        |
| SHEDDEN LUNG CANCER POOR SURVIVAL A6          | 427  | 0.816478 | 2.415649 | <0.0001        | <0.0001        |
| HORIUCHI WTAP TARGETS DN                      | 293  | 0.728973 | 2.415397 | <0.0001        | <0.0001        |
| REACTOME CELL CYCLE MITOTIC                   | 299  | 0.73335  | 2.414615 | <0.0001        | <0.0001        |
| GRAHAM CML DIVIDING VS NORMAL QUIESCENT UP    | 176  | 0.794351 | 2.40974  | <0.0001        | <0.0001        |
| HOFFMANN LARGE TO SMALL PRE BII LYMPHOCYTE UP | 158  | 0.795924 | 2.405677 | <0.0001        | <0.0001        |
| LE EGR2 TARGETS UP                            | 104  | 0.80024  | 2.405358 | <0.0001        | <0.0001        |
| LEE EARLY T LYMPHOCYTE UP                     | 97   | 0.844579 | 2.399977 | <0.0001        | <0.0001        |
| PUJANA BRCA2 PCC NETWORK                      | 401  | 0.733439 | 2.399403 | <0.0001        | <0.0001        |

|                                                                   |     |          |          |         |          |
|-------------------------------------------------------------------|-----|----------|----------|---------|----------|
| KOBAYASHI EGFR SIGNALING 24HR DN                                  | 242 | 0.858716 | 2.392327 | <0.0001 | <0.0001  |
| BURTON ADIPOGENESIS 3                                             | 100 | 0.854862 | 2.391245 | <0.0001 | <0.0001  |
| LINDGREN BLADDER CANCER CLUSTER 3 UP                              | 305 | 0.704228 | 2.390668 | <0.0001 | <0.0001  |
| PUJANA BREAST CANCER LIT INT NETWORK                              | 97  | 0.713468 | 2.38424  | <0.0001 | 1.85E-05 |
| MANALO HYPOXIA DN                                                 | 271 | 0.765634 | 2.381619 | <0.0001 | 1.82E-05 |
| REACTOME MITOTIC PROMETAPHASE                                     | 78  | 0.822793 | 2.367637 | <0.0001 | 6.19E-05 |
| REACTOME MITOTIC G2 G2 M PHASES                                   | 77  | 0.694932 | 2.365062 | <0.0001 | 6.07E-05 |
| PYEON CANCER HEAD AND NECK VS CERVICAL UP                         | 169 | 0.689481 | 2.362038 | <0.0001 | 5.96E-05 |
| MORI PRE BI LYMPHOCYTE UP                                         | 78  | 0.7633   | 2.361567 | <0.0001 | 5.84E-05 |
| WEST ADRENOCORTICAL TUMOR UP                                      | 282 | 0.670382 | 2.359493 | <0.0001 | 5.74E-05 |
| FISCHER G1 S CELL CYCLE                                           | 192 | 0.64337  | 2.353799 | <0.0001 | 5.63E-05 |
| TARTE PLASMA CELL VS PLASMABLAST DN                               | 300 | 0.686566 | 2.353118 | <0.0001 | 5.53E-05 |
| RIZ ERYTHROID DIFFERENTIATION                                     | 72  | 0.684927 | 2.352404 | <0.0001 | 5.43E-05 |
| KAUFFMANN DNA REPAIR GENES                                        | 219 | 0.639908 | 2.350098 | <0.0001 | 5.34E-05 |
| REACTOME CELL CYCLE                                               | 386 | 0.693068 | 2.34536  | <0.0001 | 6.65E-05 |
| TANG SENESENCE TP53 TARGETS DN                                    | 54  | 0.889923 | 2.34484  | <0.0001 | 6.54E-05 |
| PEART HDAC PROLIFERATION CLUSTER DN                               | 73  | 0.697289 | 2.343508 | <0.0001 | 6.43E-05 |
| PID AURORA A PATHWAY                                              | 30  | 0.783023 | 2.33772  | <0.0001 | 6.33E-05 |
| PID AURORA B PATHWAY                                              | 37  | 0.845793 | 2.335224 | <0.0001 | 6.23E-05 |
| CROONQUIST IL6 DEPRIVATION DN                                     | 96  | 0.910438 | 2.334166 | <0.0001 | 6.13E-05 |
| PAL PRMT5 TARGETS UP                                              | 195 | 0.641676 | 2.333921 | <0.0001 | 6.04E-05 |
| CROONQUIST NRAS VS STROMAL STIMULATION DN                         | 98  | 0.654713 | 2.329878 | <0.0001 | 5.94E-05 |
| WINNEPENNINCKX MELANOMA METASTASIS UP                             | 151 | 0.836517 | 2.327474 | <0.0001 | 5.86E-05 |
| MUELLER PLURINET                                                  | 296 | 0.691944 | 2.327251 | <0.0001 | 5.77E-05 |
| ZHANG TLX TARGETS DN                                              | 87  | 0.910856 | 2.327075 | <0.0001 | 5.69E-05 |
| BURTON ADIPOGENESIS PEAK AT 24HR                                  | 42  | 0.889311 | 2.326663 | <0.0001 | 5.60E-05 |
| NAKAYAMA SOFT TISSUE TUMORS PCA2 UP                               | 86  | 0.778926 | 2.322817 | <0.0001 | 7.13E-05 |
| REACTOME RECRUITMENT OF MITOTIC CENTROSOME PROTEINS AND COMPLEXES | 62  | 0.663006 | 2.321396 | <0.0001 | 7.03E-05 |
| OLSSON E2F3 TARGETS DN                                            | 45  | 0.724699 | 2.31756  | <0.0001 | 6.94E-05 |
| ZHANG TLX TARGETS 36HR DN                                         | 182 | 0.81015  | 2.315679 | <0.0001 | 6.84E-05 |
| GRADE COLON AND RECTAL CANCER UP                                  | 272 | 0.657404 | 2.312434 | <0.0001 | 6.75E-05 |
| SENGUPTA NASOPHARYNGEAL CARCINOMA UP                              | 275 | 0.679703 | 2.312428 | <0.0001 | 6.66E-05 |
| NADERI BREAST CANCER PROGNOSIS UP                                 | 46  | 0.794386 | 2.312046 | <0.0001 | 6.58E-05 |
| GEORGES CELL CYCLE MIR192 TARGETS                                 | 61  | 0.755207 | 2.311957 | <0.0001 | 6.49E-05 |
| REACTOME MRNA PROCESSING                                          | 151 | 0.677944 | 2.310748 | <0.0001 | 6.41E-05 |
| KONG E2F3 TARGETS                                                 | 94  | 0.893101 | 2.308986 | <0.0001 | 6.33E-05 |
| GARCIA TARGETS OF FLI1 AND DAX1 DN                                | 163 | 0.670404 | 2.307959 | <0.0001 | 6.25E-05 |
| CHICAS RB1 TARGETS GROWING                                        | 225 | 0.656    | 2.305482 | <0.0001 | 7.57E-05 |
| BOYALT LIVER CANCER SUBCLASS G23 UP                               | 49  | 0.842025 | 2.304992 | <0.0001 | 7.48E-05 |
| PUJANA XPRSS INT NETWORK                                          | 161 | 0.801418 | 2.304236 | <0.0001 | 7.39E-05 |
| VANTVEER BREAST CANCER METASTASIS DN                              | 111 | 0.736104 | 2.302841 | <0.0001 | 7.30E-05 |
| WU APOPTOSIS BY CDKN1A VIA TP53                                   | 54  | 0.888194 | 2.300104 | <0.0001 | 7.21E-05 |
| PID FOXM1 PATHWAY                                                 | 40  | 0.748312 | 2.298363 | <0.0001 | 7.13E-05 |
| ALCALAY AML BY NPM1 LOCALIZATION DN                               | 180 | 0.544985 | 2.294987 | <0.0001 | 8.39E-05 |
| REACTOME GLUCOSE TRANSPORT                                        | 37  | 0.743485 | 2.294825 | <0.0001 | 8.29E-05 |
| STEIN ESRRA TARGETS RESPONSIVE TO ESTROGEN DN                     | 39  | 0.81439  | 2.294499 | <0.0001 | 8.20E-05 |
| MOLENAAR TARGETS OF CCND1 AND CDK4 DN                             | 51  | 0.8837   | 2.286442 | <0.0001 | 1.01E-04 |
| XU HGF SIGNALING NOT VIA AKT1 48HR DN                             | 20  | 0.808827 | 2.28584  | <0.0001 | 9.99E-05 |



|                                                            |     |          |          |         |          |
|------------------------------------------------------------|-----|----------|----------|---------|----------|
| GENTILE RESPONSE CLUSTER D3                                | 61  | 0.658938 | 2.284339 | <0.0001 | 9.88E-05 |
| GOLDRATH ANTIGEN RESPONSE                                  | 331 | 0.614894 | 2.284271 | <0.0001 | 9.78E-05 |
| CHIARADONNA NEOPLASTIC TRANSFORMATION KRAS UP              | 121 | 0.624373 | 2.280433 | <0.0001 | 1.07E-04 |
| BENPORATH PROLIFERATION                                    | 136 | 0.814502 | 2.280209 | <0.0001 | 1.06E-04 |
| REACTOME DNA REPLICATION                                   | 180 | 0.793046 | 2.27984  | <0.0001 | 1.05E-04 |
| REACTOME LOSS OF NLP FROM MITOTIC CENTROSOMES              | 55  | 0.678061 | 2.279517 | <0.0001 | 1.15E-04 |
| VERNELL RETINOBLASTOMA PATHWAY UP                          | 68  | 0.80927  | 2.278211 | <0.0001 | 1.13E-04 |
| MISSIAGLIA REGULATED BY METHYLATION DN                     | 115 | 0.817003 | 2.277496 | <0.0001 | 1.12E-04 |
| PID E2F PATHWAY                                            | 73  | 0.672305 | 2.275194 | <0.0001 | 1.11E-04 |
| REACTOME MITOTIC M M G1 PHASES                             | 160 | 0.779826 | 2.272403 | <0.0001 | 1.17E-04 |
| BHATTACHARYA EMBRYONIC STEM CELL                           | 86  | 0.708858 | 2.269721 | <0.0001 | 1.31E-04 |
| ZHOU CELL CYCLE GENES IN IR RESPONSE 24HR                  | 119 | 0.850134 | 2.266954 | <0.0001 | 1.41E-04 |
| YU BAP1 TARGETS                                            | 29  | 0.768103 | 2.266531 | <0.0001 | 1.40E-04 |
| BIDUS METASTASIS UP                                        | 204 | 0.719619 | 2.265172 | <0.0001 | 1.38E-04 |
| MORI EMU MYC LYMPHOMA BY ONSET TIME UP                     | 99  | 0.676762 | 2.264455 | <0.0001 | 1.60E-04 |
| WANG CISPLATIN RESPONSE AND XPC UP                         | 190 | 0.562129 | 2.261287 | <0.0001 | 1.71E-04 |
| WHITEFORD PEDIATRIC CANCER MARKERS                         | 111 | 0.862278 | 2.260581 | <0.0001 | 1.69E-04 |
| MORI IMMATURE B LYMPHOCYTE DN                              | 90  | 0.841432 | 2.259593 | <0.0001 | 1.78E-04 |
| BENPORATH ES CORE NINE CORRELATED                          | 98  | 0.630887 | 2.259514 | <0.0001 | 1.76E-04 |
| GRAHAM CML QUIESCENT VS NORMAL QUIESCENT UP                | 80  | 0.658461 | 2.258753 | <0.0001 | 1.75E-04 |
| PID ATR PATHWAY                                            | 39  | 0.833682 | 2.258667 | <0.0001 | 1.73E-04 |
| BENPORATH ES 2                                             | 39  | 0.72723  | 2.257777 | <0.0001 | 1.72E-04 |
| KAUFFMANN MELANOMA RELAPSE UP                              | 59  | 0.884929 | 2.256542 | <0.0001 | 1.70E-04 |
| PUJANA BRCA CENTERED NETWORK                               | 114 | 0.814561 | 2.256107 | <0.0001 | 1.69E-04 |
| LIAO METASTASIS                                            | 495 | 0.501986 | 2.255941 | <0.0001 | 1.67E-04 |
| LY AGING OLD DN                                            | 55  | 0.820124 | 2.255255 | <0.0001 | 1.66E-04 |
| PENG LEUCINE DEPRIVATION DN                                | 182 | 0.654905 | 2.25395  | <0.0001 | 1.64E-04 |
| HU GENOTOXIC DAMAGE 4HR                                    | 35  | 0.7872   | 2.25334  | <0.0001 | 1.63E-04 |
| PID FANCONI PATHWAY                                        | 43  | 0.796392 | 2.252355 | <0.0001 | 1.62E-04 |
| CROONQUIST NRAS SIGNALING DN                               | 71  | 0.926879 | 2.251029 | <0.0001 | 1.68E-04 |
| WEST ADRENOCORTICAL TUMOR MARKERS UP                       | 21  | 0.862136 | 2.250474 | <0.0001 | 1.67E-04 |
| SU TESTIS                                                  | 67  | 0.682402 | 2.249822 | <0.0001 | 1.65E-04 |
| PID PLK1 PATHWAY                                           | 43  | 0.80469  | 2.249556 | <0.0001 | 1.64E-04 |
| CHANG CORE SERUM RESPONSE UP                               | 198 | 0.6738   | 2.249262 | <0.0001 | 1.63E-04 |
| REACTOME PROCESSING OF CAPPED INTRON CONTAINING PRE MRNA   | 132 | 0.689805 | 2.248208 | <0.0001 | 1.61E-04 |
| LABBE WNT3A TARGETS UP                                     | 108 | 0.539421 | 2.246352 | <0.0001 | 1.60E-04 |
| REN BOUND BY E2F                                           | 60  | 0.894843 | 2.246019 | <0.0001 | 1.59E-04 |
| ZHOU CELL CYCLE GENES IN IR RESPONSE 6HR                   | 80  | 0.890253 | 2.242706 | <0.0001 | 1.58E-04 |
| GARGALOVIC RESPONSE TO OXIDIZED PHOSPHOLIPIDS TURQUOISE DN | 50  | 0.744311 | 2.241454 | <0.0001 | 1.65E-04 |
| PENG GLUTAMINE DEPRIVATION DN                              | 324 | 0.613118 | 2.240468 | <0.0001 | 1.64E-04 |
| PYEON HPV POSITIVE TUMORS UP                               | 84  | 0.700808 | 2.237365 | <0.0001 | 1.86E-04 |
| MOHANKUMAR HOXA1 TARGETS UP                                | 384 | 0.533987 | 2.23503  | <0.0001 | 1.84E-04 |
| CHANDRAN METASTASIS UP                                     | 191 | 0.533844 | 2.234377 | <0.0001 | 1.83E-04 |
| THILLAINADESAN ZNF217 TARGETS UP                           | 42  | 0.696334 | 2.231721 | <0.0001 | 2.11E-04 |
| XU HGF TARGETS INDUCED BY AKT1 48HR DN                     | 24  | 0.799407 | 2.228777 | <0.0001 | 2.17E-04 |
| KARLSSON TGFB1 TARGETS UP                                  | 118 | 0.646269 | 2.227601 | <0.0001 | 2.22E-04 |
| KIM WT1 TARGETS DN                                         | 427 | 0.534994 | 2.226837 | <0.0001 | 2.21E-04 |

|                                                                         |     |          |          |         |          |
|-------------------------------------------------------------------------|-----|----------|----------|---------|----------|
| REACTOME HIV LIFE CYCLE                                                 | 105 | 0.646826 | 2.224949 | <0.0001 | 2.26E-04 |
| ZHANG BREAST CANCER PROGENITORS UP                                      | 399 | 0.62057  | 2.224277 | <0.0001 | 2.32E-04 |
| BOYALT LIVER CANCER SUBCLASS G3 UP                                      | 181 | 0.732087 | 2.22399  | <0.0001 | 2.30E-04 |
| GREENBAUM E2A TARGETS UP                                                | 32  | 0.868471 | 2.223044 | <0.0001 | 2.29E-04 |
| WHITFIELD CELL CYCLE G1 S                                               | 128 | 0.603238 | 2.222478 | <0.0001 | 2.34E-04 |
| EPPERT PROGENITOR                                                       | 125 | 0.658069 | 2.219506 | <0.0001 | 2.44E-04 |
| WHITFIELD CELL CYCLE S                                                  | 147 | 0.606982 | 2.217655 | <0.0001 | 2.42E-04 |
| REACTOME TRANSPORT OF MATURE TRANSCRIPT TO CYTOPLASM                    | 51  | 0.729971 | 2.21592  | <0.0001 | 2.45E-04 |
| SERVITJA LIVER HNF1A TARGETS UP                                         | 132 | 0.515127 | 2.215804 | <0.0001 | 2.44E-04 |
| STEIN ESRI TARGETS                                                      | 82  | 0.587358 | 2.212768 | <0.0001 | 2.66E-04 |
| DANG REGULATED BY MYC UP                                                | 71  | 0.684629 | 2.212471 | <0.0001 | 2.64E-04 |
| GRAHAM NORMAL QUIESCENT VS NORMAL DIVIDING DN                           | 85  | 0.877635 | 2.211792 | <0.0001 | 2.69E-04 |
| REACTOME REGULATION OF GLUCOKINASE BY GLUCOKINASE REGULATORY PROTEIN    | 26  | 0.806491 | 2.210947 | <0.0001 | 2.72E-04 |
| BURTON ADIPOGENESIS PEAK AT 16HR                                        | 40  | 0.798562 | 2.208908 | <0.0001 | 2.80E-04 |
| PUJANA BREAST CANCER WITH BRCA1 MUTATED UP                              | 54  | 0.877099 | 2.208528 | <0.0001 | 2.78E-04 |
| PID MYC ACTIV PATHWAY                                                   | 78  | 0.670096 | 2.200786 | <0.0001 | 3.12E-04 |
| MARKEY RB1 CHRONIC LOF UP                                               | 111 | 0.576633 | 2.198618 | <0.0001 | 3.18E-04 |
| CHEN ETV5 TARGETS TESTIS                                                | 21  | 0.85175  | 2.198446 | <0.0001 | 3.16E-04 |
| NAKAMURA CANCER MICROENVIRONMENT DN                                     | 43  | 0.801437 | 2.196281 | <0.0001 | 3.35E-04 |
| REACTOME LATE PHASE OF HIV LIFE CYCLE                                   | 92  | 0.651908 | 2.196273 | <0.0001 | 3.33E-04 |
| PID ATM PATHWAY                                                         | 33  | 0.715714 | 2.195678 | <0.0001 | 3.31E-04 |
| REACTOME TRANSPORT OF MATURE MRNA DERIVED FROM AN INTRONLESS TRANSCRIPT | 31  | 0.794525 | 2.194744 | <0.0001 | 3.36E-04 |
| MORI MATURE B LYMPHOCYTE DN                                             | 72  | 0.645012 | 2.190867 | <0.0001 | 3.60E-04 |
| SOTIRIOU BREAST CANCER GRADE 1 VS 3 UP                                  | 141 | 0.906792 | 2.190187 | <0.0001 | 3.58E-04 |
| OXFORD RALA OR RALB TARGETS UP                                          | 45  | 0.839893 | 2.188002 | <0.0001 | 3.71E-04 |
| ROSTY CERVICAL CANCER PROLIFERATION CLUSTER                             | 133 | 0.903303 | 2.186217 | <0.0001 | 3.80E-04 |
| BORCZUK MALIGNANT MESOTHELIOMA UP                                       | 291 | 0.627247 | 2.186204 | <0.0001 | 3.77E-04 |
| MORI LARGE PRE BII LYMPHOCYTE UP                                        | 84  | 0.813722 | 2.18572  | <0.0001 | 3.75E-04 |
| WAKASUGI HAVE ZNF143 BINDING SITES                                      | 56  | 0.678475 | 2.185088 | <0.0001 | 3.78E-04 |
| ODONNELL TARGETS OF MYC AND TFRC DN                                     | 43  | 0.851083 | 2.181835 | <0.0001 | 4.02E-04 |
| SCIBETTA KDM5B TARGETS DN                                               | 77  | 0.614466 | 2.181623 | <0.0001 | 4.08E-04 |
| FRASOR RESPONSE TO SERM OR FULVESTRANT DN                               | 50  | 0.847613 | 2.181508 | <0.0001 | 4.06E-04 |
| LY AGING PREMATURE DN                                                   | 29  | 0.817715 | 2.180502 | <0.0001 | 4.27E-04 |
| REACTOME TRANSPORT OF RIBONUCLEOPROTEINS INTO THE HOST NUCLEUS          | 26  | 0.824211 | 2.180265 | <0.0001 | 4.29E-04 |
| RHODES CANCER META SIGNATURE                                            | 63  | 0.752764 | 2.17843  | <0.0001 | 4.45E-04 |
| YUAN ZNF143 PARTNERS                                                    | 21  | 0.797695 | 2.177093 | <0.0001 | 4.53E-04 |
| DELPUECH FOXO3 TARGETS DN                                               | 39  | 0.762981 | 2.176658 | <0.0001 | 4.57E-04 |
| JAEGER METASTASIS UP                                                    | 43  | 0.730693 | 2.175459 | <0.0001 | 4.63E-04 |
| WANG METASTASIS OF BREAST CANCER ESRI UP                                | 19  | 0.899648 | 2.175379 | <0.0001 | 4.60E-04 |
| CHANDRAN METASTASIS TOP50 UP                                            | 34  | 0.691174 | 2.172908 | <0.0001 | 4.91E-04 |
| PETROVA ENDOTHELIUM LYMPHATIC VS BLOOD UP                               | 126 | 0.550446 | 2.17231  | <0.0001 | 4.89E-04 |
| REACTOME INTERACTIONS OF VPR WITH HOST CELLULAR PROTEINS                | 31  | 0.760647 | 2.170238 | <0.0001 | 5.15E-04 |
| BOYALT LIVER CANCER SUBCLASS G123 UP                                    | 44  | 0.753895 | 2.168304 | <0.0001 | 5.38E-04 |
| REACTOME DNA REPAIR                                                     | 101 | 0.628646 | 2.167815 | <0.0001 | 5.35E-04 |

|                                                                                                                                      |     |          |          |         |          |
|--------------------------------------------------------------------------------------------------------------------------------------|-----|----------|----------|---------|----------|
| WONG EMBRYONIC STEM CELL CORE                                                                                                        | 330 | 0.71035  | 2.167248 | <0.0001 | 5.32E-04 |
| PETROVA PROX1 TARGETS UP                                                                                                             | 27  | 0.79695  | 2.166576 | <0.0001 | 5.29E-04 |
| REACTOME DOUBLE STRAND BREAK REPAIR                                                                                                  | 21  | 0.795255 | 2.165606 | <0.0001 | 5.39E-04 |
| YAMAZAKI TCEB3 TARGETS DN                                                                                                            | 204 | 0.551047 | 2.16489  | <0.0001 | 5.49E-04 |
| FERRANDO T ALL WITH MLL ENL FUSION DN                                                                                                | 83  | 0.624372 | 2.163714 | <0.0001 | 5.56E-04 |
| REACTOME METABOLISM OF NON CODING RNA                                                                                                | 47  | 0.742599 | 2.160016 | <0.0001 | 6.06E-04 |
| MATTIOLI MGUS VS PCL                                                                                                                 | 93  | 0.605428 | 2.159106 | <0.0001 | 6.09E-04 |
| VANTVEER BREAST CANCER ESR1 DN                                                                                                       | 226 | 0.560046 | 2.15587  | <0.0001 | 6.50E-04 |
| WILCOX RESPONSE TO PROGESTERONE UP                                                                                                   | 140 | 0.595077 | 2.154259 | <0.0001 | 6.67E-04 |
| FOURNIER ACINAR DEVELOPMENT LATE DN                                                                                                  | 21  | 0.847551 | 2.154185 | <0.0001 | 6.64E-04 |
| UDAYAKUMAR MED1 TARGETS UP                                                                                                           | 129 | 0.566115 | 2.15414  | <0.0001 | 6.67E-04 |
| GARY CD5 TARGETS DN                                                                                                                  | 414 | 0.584464 | 2.152362 | <0.0001 | 6.73E-04 |
| REACTOME APC CDC20 MEDIATED DEGRADATION OF NEK2A                                                                                     | 21  | 0.855183 | 2.152212 | <0.0001 | 6.69E-04 |
| REACTOME NEP NS2 INTERACTS WITH THE CELLULAR EXPORT MACHINERY                                                                        | 26  | 0.822461 | 2.152121 | <0.0001 | 6.66E-04 |
| PID BARD1 PATHWAY                                                                                                                    | 28  | 0.796554 | 2.145886 | <0.0001 | 7.14E-04 |
| DAIRKEE CANCER PRONE RESPONSE BPA                                                                                                    | 49  | 0.609662 | 2.145401 | <0.0001 | 7.10E-04 |
| SONG TARGETS OF IE86 CMV PROTEIN                                                                                                     | 58  | 0.840351 | 2.143159 | <0.0001 | 7.40E-04 |
| WHITFIELD CELL CYCLE LITERATURE                                                                                                      | 44  | 0.908925 | 2.142448 | <0.0001 | 7.36E-04 |
| REACTOME KINESINS                                                                                                                    | 23  | 0.825208 | 2.141724 | <0.0001 | 7.51E-04 |
| MARTINEZ RESPONSE TO TRABECTEDIN DN                                                                                                  | 265 | 0.566944 | 2.141457 | <0.0001 | 7.51E-04 |
| NUNODA RESPONSE TO DASATINIB IMATINIB UP                                                                                             | 29  | 0.664982 | 2.141399 | <0.0001 | 7.48E-04 |
| REACTOME E2F MEDIATED REGULATION OF DNA REPLICATION                                                                                  | 33  | 0.820768 | 2.14092  | <0.0001 | 7.48E-04 |
| SUNG METASTASIS STROMA DN                                                                                                            | 49  | 0.686454 | 2.140358 | <0.0001 | 7.55E-04 |
| KANG DOXORUBICIN RESISTANCE UP                                                                                                       | 50  | 0.960602 | 2.139787 | <0.0001 | 7.57E-04 |
| REACTOME G2 M CHECKPOINTS                                                                                                            | 41  | 0.856706 | 2.1397   | <0.0001 | 7.53E-04 |
| KEGG OOCYTE MEIOSIS                                                                                                                  | 107 | 0.541611 | 2.13967  | <0.0001 | 7.49E-04 |
| WILLIAMS ESR1 TARGETS UP                                                                                                             | 26  | 0.675222 | 2.139384 | <0.0001 | 7.46E-04 |
| ISHIDA E2F TARGETS                                                                                                                   | 50  | 0.924684 | 2.137164 | <0.0001 | 7.58E-04 |
| REACTOME ANTIVIRAL MECHANISM BY IFN STIMULATED GENES                                                                                 | 64  | 0.645225 | 2.136975 | <0.0001 | 7.58E-04 |
| REACTOME INHIBITION OF THE PROTEOLYTIC ACTIVITY OF APC C REQUIRED FOR THE ONSET OF ANAPHASE BY MITOTIC SPINDLE CHECKPOINT COMPONENTS | 18  | 0.852275 | 2.136087 | <0.0001 | 7.65E-04 |
| ZAMORA NOS2 TARGETS UP                                                                                                               | 64  | 0.655794 | 2.133023 | <0.0001 | 8.04E-04 |
| LEE LIVER CANCER SURVIVAL DN                                                                                                         | 165 | 0.673741 | 2.131174 | <0.0001 | 8.26E-04 |
| BIOCARTA ATRBRCA PATHWAY                                                                                                             | 19  | 0.803318 | 2.128207 | <0.0001 | 8.64E-04 |
| LI WILMS TUMOR ANAPLASTIC UP                                                                                                         | 19  | 0.937158 | 2.128053 | <0.0001 | 8.61E-04 |
| KEGG DNA REPLICATION                                                                                                                 | 36  | 0.869243 | 2.125047 | <0.0001 | 8.99E-04 |
| PUIFFE INVASION INHIBITED BY ASCITES UP                                                                                              | 81  | 0.572121 | 2.124737 | <0.0001 | 8.99E-04 |
| SASAKI ADULT T CELL LEUKEMIA                                                                                                         | 168 | 0.550264 | 2.124196 | <0.0001 | 9.07E-04 |
| KEGG ONE CARBON POOL BY FOLATE                                                                                                       | 17  | 0.746395 | 2.123496 | <0.0001 | 9.11E-04 |
| RHODES UNDIFFERENTIATED CANCER                                                                                                       | 67  | 0.81671  | 2.122367 | <0.0001 | 9.33E-04 |
| SMIRNOV RESPONSE TO IR 6HR DN                                                                                                        | 108 | 0.598424 | 2.121625 | <0.0001 | 9.59E-04 |
| BHATI G2M ARREST BY 2METHOXYESTRADIOL UP                                                                                             | 108 | 0.547504 | 2.121505 | <0.0001 | 9.55E-04 |
| REICHERT MITOSIS LIN9 TARGETS                                                                                                        | 27  | 0.937563 | 2.11949  | <0.0001 | 9.72E-04 |
| REACTOME MRNA SPLICING                                                                                                               | 104 | 0.658175 | 2.119412 | <0.0001 | 9.67E-04 |
| TURASHVILI BREAST DUCTAL CARCINOMA VS LOBULAR                                                                                        | 71  | 0.66102  | 2.118949 | <0.0001 | 9.73E-04 |

|                                                                     |     |          |          |          |          |
|---------------------------------------------------------------------|-----|----------|----------|----------|----------|
| NORMAL UP                                                           |     |          |          |          |          |
| KAMMINGA EZH2 TARGETS                                               | 41  | 0.888495 | 2.113548 | <0.0001  | 0.001035 |
| BIOCARTA G2 PATHWAY                                                 | 24  | 0.72111  | 2.112303 | 0.001976 | 0.00105  |
| REACTOME G1 S SPECIFIC TRANSCRIPTION                                | 17  | 0.899431 | 2.111586 | <0.0001  | 0.001046 |
| REACTOME PHOSPHORYLATION OF THE APC C                               | 17  | 0.8417   | 2.111012 | <0.0001  | 0.001053 |
| SMID BREAST CANCER LUMINAL A DN                                     | 18  | 0.928521 | 2.110611 | <0.0001  | 0.001057 |
| AMUNDSON GAMMA RADIATION RESPONSE                                   | 40  | 0.868888 | 2.107679 | <0.0001  | 0.00115  |
| MONNIER POSTRADIATION TUMOR ESCAPE UP                               | 374 | 0.482796 | 2.106114 | <0.0001  | 0.00118  |
| SCHLOSSER MYC TARGETS AND SERUM RESPONSE DN                         | 45  | 0.722332 | 2.104194 | <0.0001  | 0.001217 |
| YANG BREAST CANCER ES1 LASER DN                                     | 49  | 0.610732 | 2.100824 | <0.0001  | 0.001285 |
| REACTOME CELL CYCLE CHECKPOINTS                                     | 111 | 0.729286 | 2.098385 | <0.0001  | 0.001338 |
| JUBAN TARGETS OF SPI1 AND FLI1 DN                                   | 84  | 0.569549 | 2.098272 | <0.0001  | 0.001333 |
| REACTOME DNA STRAND ELONGATION                                      | 30  | 0.919092 | 2.097477 | <0.0001  | 0.001327 |
| KEGG HOMOLOGOUS RECOMBINATION                                       | 26  | 0.774813 | 2.093362 | <0.0001  | 0.001431 |
| BIOCARTA G1 PATHWAY                                                 | 28  | 0.675212 | 2.092306 | <0.0001  | 0.001448 |
| YU MYC TARGETS UP                                                   | 39  | 0.860119 | 2.089476 | <0.0001  | 0.001513 |
| HONRADO BREAST CANCER BRCA1 VS BRCA2                                | 18  | 0.750159 | 2.087336 | <0.0001  | 0.001533 |
| ENK UV RESPONSE KERATINOCYTE DN                                     | 479 | 0.50511  | 2.084076 | <0.0001  | 0.001601 |
| SHAFFER IRF4 TARGETS IN ACTIVATED B LYMPHOCYTE                      | 76  | 0.598363 | 2.082454 | <0.0001  | 0.001626 |
| REACTOME APC C CDC20 MEDIATED DEGRADATION OF CYCLIN B               | 19  | 0.82178  | 2.079784 | <0.0001  | 0.001731 |
| REACTOME MITOTIC G1 G1 S PHASES                                     | 130 | 0.6897   | 2.077138 | <0.0001  | 0.001778 |
| NAKAMURA TUMOR ZONE PERIPHERAL VS CENTRAL UP                        | 267 | 0.559954 | 2.0759   | <0.0001  | 0.001834 |
| OUELLET OVARIAN CANCER INVASIVE VS LMP UP                           | 117 | 0.622279 | 2.075105 | <0.0001  | 0.001831 |
| SIMBULAN PARP1 TARGETS DN                                           | 17  | 0.888615 | 2.072002 | <0.0001  | 0.001923 |
| BOYLAN MULTIPLE MYELOMA C D UP                                      | 129 | 0.491912 | 2.07141  | <0.0001  | 0.001929 |
| GROSS HYPOXIA VIA ELK3 UP                                           | 198 | 0.471301 | 2.069197 | <0.0001  | 0.001982 |
| VANTVEER BREAST CANCER POOR PROGNOSIS                               | 50  | 0.600746 | 2.068319 | 0.006036 | 0.001996 |
| ABRAMSON INTERACT WITH AIRE                                         | 44  | 0.733943 | 2.066511 | <0.0001  | 0.002065 |
| MATZUK MEIOTIC AND DNA REPAIR                                       | 35  | 0.627007 | 2.066183 | <0.0001  | 0.002056 |
| REACTOME G0 AND EARLY G1                                            | 23  | 0.806231 | 2.063543 | <0.0001  | 0.002138 |
| YANG BCL3 TARGETS UP                                                | 344 | 0.443605 | 2.061485 | <0.0001  | 0.002181 |
| REACTOME FANCONI ANEMIA PATHWAY                                     | 19  | 0.848344 | 2.061417 | <0.0001  | 0.00218  |
| ZHAN MULTIPLE MYELOMA PR UP                                         | 43  | 0.93328  | 2.060436 | <0.0001  | 0.002199 |
| SCHLOSSER MYC TARGETS REPRESSED BY SERUM                            | 153 | 0.648982 | 2.060364 | <0.0001  | 0.00219  |
| BOYLAN MULTIPLE MYELOMA C CLUSTER UP                                | 37  | 0.59411  | 2.058488 | <0.0001  | 0.002244 |
| BILANGES SERUM SENSITIVE VIA TSC2                                   | 37  | 0.671963 | 2.056884 | <0.0001  | 0.00229  |
| CHIARETTI T ALL RELAPSE PROGNOSIS                                   | 19  | 0.750839 | 2.056361 | <0.0001  | 0.002308 |
| REACTOME ACTIVATION OF ATR IN RESPONSE TO REPLICATION STRESS        | 35  | 0.848436 | 2.052634 | <0.0001  | 0.002445 |
| BOHN PRIMARY IMMUNODEFICIENCY SYNDROM UP                            | 45  | 0.629882 | 2.051573 | <0.0001  | 0.002459 |
| BASSO B LYMPHOCYTE NETWORK                                          | 135 | 0.532313 | 2.0499   | 0.001957 | 0.002502 |
| GROSS HYPOXIA VIA ELK3 ONLY DN                                      | 41  | 0.563094 | 2.049859 | <0.0001  | 0.002493 |
| REACTOME CONVERSION FROM APC C CDC20 TO APC C CDH1 IN LATE ANAPHASE | 16  | 0.769687 | 2.04824  | <0.0001  | 0.002543 |
| CUI TCF21 TARGETS 2 UP                                              | 404 | 0.469723 | 2.04728  | <0.0001  | 0.002557 |
| REACTOME ACTIVATION OF THE PRE REPLICATIVE COMPLEX                  | 30  | 0.880281 | 2.047278 | <0.0001  | 0.002547 |
| KEGG SPLICEOSOME                                                    | 123 | 0.614674 | 2.046917 | <0.0001  | 0.002547 |

|                                                                   |     |          |          |          |          |
|-------------------------------------------------------------------|-----|----------|----------|----------|----------|
| SLEBOS HEAD AND NECK CANCER WITH HPV UP                           | 78  | 0.668341 | 2.046518 | 0.004    | 0.002552 |
| KRASNOSELSKAYA ILF3 TARGETS DN                                    | 44  | 0.578547 | 2.045805 | <0.0001  | 0.002587 |
| SCHUHMACHER MYC TARGETS UP                                        | 77  | 0.673086 | 2.045094 | <0.0001  | 0.002591 |
| SCHLOSSER MYC TARGETS AND SERUM RESPONSE UP                       | 46  | 0.661722 | 2.044917 | <0.0001  | 0.002585 |
| YAO TEMPORAL RESPONSE TO PROGESTERONE CLUSTER 11                  | 95  | 0.585354 | 2.043413 | <0.0001  | 0.002631 |
| LE NEURONAL DIFFERENTIATION DN                                    | 19  | 0.806641 | 2.041215 | <0.0001  | 0.002708 |
| GAL LEUKEMIC STEM CELL DN                                         | 233 | 0.521663 | 2.037668 | <0.0001  | 0.002857 |
| KEGG MISMATCH REPAIR                                              | 23  | 0.792861 | 2.036774 | <0.0001  | 0.002892 |
| ZHAN MULTIPLE MYELOMA SUBGROUPS                                   | 30  | 0.783434 | 2.034444 | <0.0001  | 0.00296  |
| IWANAGA E2F1 TARGETS INDUCED BY SERUM                             | 29  | 0.748001 | 2.03212  | <0.0001  | 0.003046 |
| WELCSH BRCA1 TARGETS DN                                           | 139 | 0.582613 | 2.030536 | <0.0001  | 0.003134 |
| REACTOME G1 S TRANSITION                                          | 106 | 0.701458 | 2.024296 | <0.0001  | 0.003411 |
| LI WILMS TUMOR VS FETAL KIDNEY 2 UP                               | 29  | 0.692672 | 2.024231 | <0.0001  | 0.003406 |
| CAIRO PML TARGETS BOUND BY MYC UP                                 | 23  | 0.71123  | 2.023444 | <0.0001  | 0.00344  |
| GENTILE UV HIGH DOSE DN                                           | 300 | 0.482203 | 2.023252 | <0.0001  | 0.003439 |
| REACTOME HIV INFECTION                                            | 184 | 0.571172 | 2.019885 | 0.002024 | 0.003615 |
| PENG RAPAMYCIN RESPONSE DN                                        | 230 | 0.577971 | 2.019522 | <0.0001  | 0.003621 |
| REACTOME CLEAVAGE OF GROWING TRANSCRIPT IN THE TERMINATION REGION | 42  | 0.675376 | 2.018684 | <0.0001  | 0.003667 |
| BIOCARTA CELLCYCLE PATHWAY                                        | 23  | 0.70707  | 2.018089 | <0.0001  | 0.003679 |
| RAMASWAMY METASTASIS UP                                           | 64  | 0.555347 | 2.017182 | <0.0001  | 0.003707 |
| KOKKINAKIS METHIONINE DEPRIVATION 96HR DN                         | 75  | 0.552112 | 2.015791 | <0.0001  | 0.003786 |
| REACTOME RNA POL II TRANSCRIPTION                                 | 93  | 0.595103 | 2.014864 | <0.0001  | 0.00382  |
| REACTOME PROCESSING OF CAPPED INTRONLESS PRE MRNA                 | 23  | 0.755274 | 2.013584 | <0.0001  | 0.003897 |
| HEDENFALK BREAST CANCER BRCA1 VS BRCA2                            | 156 | 0.494516 | 2.012398 | <0.0001  | 0.003938 |
| PID TELOMERASE PATHWAY                                            | 67  | 0.540832 | 2.012027 | <0.0001  | 0.003944 |
| REACTOME S PHASE                                                  | 106 | 0.714839 | 2.011464 | <0.0001  | 0.003962 |
| ELVIDGE HYPOXIA DN                                                | 136 | 0.526811 | 2.009907 | <0.0001  | 0.004024 |
| CAIRO HEPATOBLASTOMA UP                                           | 197 | 0.488101 | 2.00944  | <0.0001  | 0.004041 |
| KEGG PROGESTERONE MEDIATED OOCYTE MATURATION                      | 83  | 0.497293 | 2.006977 | <0.0001  | 0.004153 |
| FARMER BREAST CANCER CLUSTER 2                                    | 32  | 0.908979 | 2.00511  | <0.0001  | 0.004237 |
| REACTOME EXTENSION OF TELOMERES                                   | 27  | 0.844126 | 2.004778 | <0.0001  | 0.004276 |
| REACTOME LAGGING STRAND SYNTHESIS                                 | 19  | 0.888307 | 2.003379 | <0.0001  | 0.004345 |
| REACTOME FORMATION OF TUBULIN FOLDING INTERMEDIATES BY CCT TRIC   | 21  | 0.742653 | 2.002449 | <0.0001  | 0.004389 |
| WINTER HYPOXIA UP                                                 | 88  | 0.615224 | 2.000517 | 0.007663 | 0.004508 |
| REACTOME SYNTHESIS OF DNA                                         | 90  | 0.739965 | 1.993704 | <0.0001  | 0.004969 |
| JEON SMAD6 TARGETS DN                                             | 19  | 0.740631 | 1.993601 | 0.002016 | 0.004958 |
| EGUCHI CELL CYCLE RB1 TARGETS                                     | 23  | 0.97528  | 1.993144 | <0.0001  | 0.004973 |
| KUROKAWA LIVER CANCER CHEMOTHERAPY DN                             | 39  | 0.551187 | 1.991965 | <0.0001  | 0.005036 |
| HESS TARGETS OF HOXA9 AND MEIS1 UP                                | 63  | 0.587435 | 1.990295 | <0.0001  | 0.005167 |
| SESTO RESPONSE TO UV C2                                           | 53  | 0.602597 | 1.989025 | <0.0001  | 0.005232 |
| REACTOME CYTOSOLIC TRNA AMINOACYLATION                            | 24  | 0.772669 | 1.987639 | <0.0001  | 0.005307 |
| SENESE HDAC2 TARGETS UP                                           | 107 | 0.561417 | 1.982967 | <0.0001  | 0.005625 |
| WONG PROTEASOME GENE MODULE                                       | 49  | 0.644623 | 1.979534 | <0.0001  | 0.005892 |
| BIOCARTA MCM PATHWAY                                              | 18  | 0.871783 | 1.979429 | <0.0001  | 0.005881 |
| MENSSEN MYC TARGETS                                               | 51  | 0.678415 | 1.975998 | 0.001969 | 0.006134 |
| REACTOME CYCLIN A B1 ASSOCIATED EVENTS DURING G2 M TRANSITION     | 15  | 0.873892 | 1.975945 | <0.0001  | 0.006118 |

|                                                                                          |     |          |          |          |          |
|------------------------------------------------------------------------------------------|-----|----------|----------|----------|----------|
| GROSS HYPOXIA VIA ELK3 AND HIF1A DN                                                      | 100 | 0.466381 | 1.974088 | <0.0001  | 0.006227 |
| REACTOME HOMOLOGOUS RECOMBINATION REPAIR OF REPLICATION INDEPENDENT DOUBLE STRAND BREAKS | 15  | 0.781991 | 1.971643 | <0.0001  | 0.00638  |
| ONDER CDH1 TARGETS 1 DN                                                                  | 163 | 0.52004  | 1.970277 | <0.0001  | 0.006494 |
| BURTON ADIPOGENESIS 4                                                                    | 44  | 0.599456 | 1.970258 | <0.0001  | 0.006474 |
| MATZUK SPERMATOCYTE                                                                      | 68  | 0.508975 | 1.964937 | <0.0001  | 0.00683  |
| MEINHOLD OVARIAN CANCER LOW GRADE DN                                                     | 20  | 0.763136 | 1.963936 | <0.0001  | 0.006888 |
| CHIBA RESPONSE TO TSA DN                                                                 | 22  | 0.689952 | 1.962235 | <0.0001  | 0.00703  |
| BIOCARTA ATM PATHWAY                                                                     | 19  | 0.656755 | 1.961606 | <0.0001  | 0.007077 |
| MOREAUX MULTIPLE MYELOMA BY TACI DN                                                      | 154 | 0.571631 | 1.960743 | 0.004008 | 0.007125 |
| BROWNE HCMV INFECTION 2HR DN                                                             | 48  | 0.600096 | 1.957341 | 0.003876 | 0.007412 |
| FINETTI BREAST CANCER KINOME RED                                                         | 16  | 0.975179 | 1.955877 | <0.0001  | 0.007528 |
| WANG RECURRENT LIVER CANCER UP                                                           | 20  | 0.661706 | 1.955834 | 0.005825 | 0.00751  |
| REACTOME HOST INTERACTIONS OF HIV FACTORS                                                | 117 | 0.589509 | 1.953403 | 0.00202  | 0.007752 |
| LAU APOPTOSIS CDKN2A UP                                                                  | 55  | 0.532113 | 1.952813 | <0.0001  | 0.007792 |
| JI RESPONSE TO FSH DN                                                                    | 57  | 0.595134 | 1.951937 | <0.0001  | 0.007843 |
| IIZUKA LIVER CANCER PROGRESSION G1 G2 DN                                                 | 24  | 0.683785 | 1.948953 | <0.0001  | 0.008141 |
| RAMALHO STEMNESS UP                                                                      | 196 | 0.507734 | 1.947663 | <0.0001  | 0.008251 |
| REACTOME M G1 TRANSITION                                                                 | 78  | 0.727732 | 1.947418 | <0.0001  | 0.008235 |
| KEGG BASE EXCISION REPAIR                                                                | 33  | 0.665263 | 1.947016 | 0.001953 | 0.008278 |
| CREIGHTON ENDOCRINE THERAPY RESISTANCE 1                                                 | 483 | 0.425214 | 1.945143 | <0.0001  | 0.008441 |
| PID P73PATHWAY                                                                           | 76  | 0.511262 | 1.94442  | 0.002049 | 0.008483 |
| HERNANDEZ MITOTIC ARREST BY DOCETAXEL 1 DN                                               | 36  | 0.612238 | 1.943955 | 0.003883 | 0.008504 |
| REACTOME MRNA 3 END PROCESSING                                                           | 33  | 0.669538 | 1.942417 | 0.00789  | 0.008606 |
| RHEIN ALL GLUCOCORTICOID THERAPY DN                                                      | 349 | 0.553248 | 1.942108 | 0.002033 | 0.008611 |
| XU RESPONSE TO TRETINOIN AND NSC682994 DN                                                | 15  | 0.808174 | 1.941696 | <0.0001  | 0.008635 |
| MOREAUX B LYMPHOCYTE MATURATION BY TACI DN                                               | 66  | 0.637039 | 1.941485 | 0.001996 | 0.00862  |
| ACOSTA PROLIFERATION INDEPENDENT MYC TARGETS UP                                          | 75  | 0.519791 | 1.940781 | <0.0001  | 0.008673 |
| JOHANSSON GLIOMAGENESIS BY PDGFB UP                                                      | 57  | 0.578771 | 1.939908 | <0.0001  | 0.008745 |
| JIANG HYPOXIA VIA VHL                                                                    | 33  | 0.597939 | 1.939604 | 0.003937 | 0.008771 |
| LY AGING MIDDLE DN                                                                       | 16  | 0.962931 | 1.934212 | <0.0001  | 0.009335 |
| DEN INTERACT WITH LCA5                                                                   | 25  | 0.686135 | 1.93151  | <0.0001  | 0.009568 |
| COLDREN GEFITINIB RESISTANCE UP                                                          | 74  | 0.529267 | 1.930096 | 0.001972 | 0.009702 |
| VANHARANTA UTERINE FIBROID WITH 7Q DELETION UP                                           | 65  | 0.529358 | 1.929423 | 0.002028 | 0.009737 |
| REACTOME PROCESSION SYNTHESIS ON THE LAGGING STRAND                                      | 15  | 0.866633 | 1.928926 | <0.0001  | 0.009754 |
| TIEN INTESTINE PROBIOTICS 2HR DN                                                         | 85  | 0.511781 | 1.924996 | <0.0001  | 0.010201 |
| WHITFIELD CELL CYCLE M G1                                                                | 140 | 0.484977 | 1.923445 | <0.0001  | 0.010349 |
| RICKMAN TUMOR DIFFERENTIATED MODERATELY VS POORLY DN                                     | 15  | 0.753345 | 1.923022 | <0.0001  | 0.010381 |
| GENTILE UV RESPONSE CLUSTER D5                                                           | 37  | 0.569663 | 1.921625 | <0.0001  | 0.010511 |
| MARIADASON RESPONSE TO BUTYRATE SULINDAC 4                                               | 21  | 0.644317 | 1.92145  | <0.0001  | 0.01051  |
| GALE APL WITH FLT3 MUTATED UP                                                            | 53  | 0.519535 | 1.919877 | <0.0001  | 0.010682 |
| LIU SOX4 TARGETS DN                                                                      | 293 | 0.429582 | 1.919009 | <0.0001  | 0.010757 |
| DANG MYC TARGETS UP                                                                      | 138 | 0.608306 | 1.918042 | 0.002024 | 0.01083  |
| BOYLAN MULTIPLE MYELOMA C UP                                                             | 44  | 0.525446 | 1.917899 | 0.001965 | 0.010826 |
| VANTVEER BREAST CANCER BRCA1 UP                                                          | 31  | 0.592304 | 1.917018 | 0.006048 | 0.01093  |
| SCIAN CELL CYCLE TARGETS OF TP53 AND TP73 DN                                             | 22  | 0.872963 | 1.91647  | <0.0001  | 0.010977 |
| JAIN NFkB SIGNALING                                                                      | 71  | 0.505407 | 1.915647 | 0.002016 | 0.011053 |

|                                                                                |     |          |          |          |          |
|--------------------------------------------------------------------------------|-----|----------|----------|----------|----------|
| REACTOME REGULATION OF MITOTIC CELL CYCLE                                      | 77  | 0.683042 | 1.913993 | <0.0001  | 0.011248 |
| DACOSTA UV RESPONSE VIA ERCC3 COMMON DN                                        | 467 | 0.539437 | 1.913581 | 0.00996  | 0.011271 |
| BROWNE HCMV INFECTION 14HR UP                                                  | 151 | 0.437797 | 1.906344 | <0.0001  | 0.012227 |
| BACOLOD RESISTANCE TO ALKYLATING AGENTS DN                                     | 57  | 0.50437  | 1.905139 | <0.0001  | 0.01235  |
| REACTOME TRNA AMINOACYLATION                                                   | 42  | 0.665197 | 1.904617 | 0.002066 | 0.012382 |
| GENTLES LEUKEMIC STEM CELL DN                                                  | 18  | 0.708551 | 1.904339 | 0.001976 | 0.012387 |
| KEGG AMINOACYL TRNA BIOSYNTHESIS                                               | 41  | 0.635608 | 1.904024 | 0.002028 | 0.012401 |
| REACTOME GLOBAL GENOMIC NER GG NER                                             | 32  | 0.637705 | 1.903426 | 0.004    | 0.012474 |
| TONKS TARGETS OF RUNX1 RUNX1T1 FUSION MONOCYTE UP                              | 195 | 0.453977 | 1.901624 | 0.004032 | 0.012695 |
| GENTILE UV RESPONSE CLUSTER D4                                                 | 54  | 0.545071 | 1.900842 | 0.001996 | 0.012769 |
| LEE METASTASIS AND RNA PROCESSING UP                                           | 17  | 0.751445 | 1.89972  | <0.0001  | 0.012891 |
| REACTOME FACTORS INVOLVED IN MEGAKARYOCYTE DEVELOPMENT AND PLATELET PRODUCTION | 111 | 0.482313 | 1.898117 | 0.00381  | 0.013122 |
| KEGG UBIQUITIN MEDIATED PROTEOLYSIS                                            | 130 | 0.463645 | 1.897385 | <0.0001  | 0.01322  |
| CHOW RASSF1 TARGETS UP                                                         | 26  | 0.60129  | 1.894908 | 0.003953 | 0.013568 |
| GROSS HYPOXIA VIA HIF1A UP                                                     | 75  | 0.510389 | 1.894526 | <0.0001  | 0.013603 |
| ZHAN VARIABLE EARLY DIFFERENTIATION GENES DN                                   | 30  | 0.601802 | 1.892928 | <0.0001  | 0.013823 |
| AMIT EGF RESPONSE 480 MCF10A                                                   | 40  | 0.552028 | 1.889329 | 0.00396  | 0.014372 |
| COLINA TARGETS OF 4EBP1 AND 4EBP2                                              | 346 | 0.418017 | 1.887206 | <0.0001  | 0.014708 |
| WANG SMARCE1 TARGETS DN                                                        | 348 | 0.444288 | 1.885691 | 0.002028 | 0.014937 |
| AIYAR COBRA1 TARGETS DN                                                        | 28  | 0.55724  | 1.884096 | 0.002016 | 0.015115 |
| PEART HDAC PROLIFERATION CLUSTER UP                                            | 55  | 0.52685  | 1.883687 | <0.0001  | 0.015155 |
| BILD MYC ONCOGENIC SIGNATURE                                                   | 187 | 0.465488 | 1.881166 | 0.002004 | 0.015558 |
| SHIPP DLBCL VS FOLLICULAR LYMPHOMA UP                                          | 44  | 0.668241 | 1.879387 | 0.005917 | 0.015797 |
| MODY HIPPOCAMPUS NEONATAL                                                      | 35  | 0.605354 | 1.879214 | 0.008    | 0.015799 |
| DAZARD UV RESPONSE CLUSTER G6                                                  | 142 | 0.53311  | 1.877704 | 0.002012 | 0.016032 |
| LOPEZ TRANSLATION VIA FN1 SIGNALING                                            | 34  | 0.55338  | 1.876149 | 0.007905 | 0.016279 |
| PID P53 REGULATION PATHWAY                                                     | 57  | 0.508715 | 1.87551  | <0.0001  | 0.016372 |
| IVANOVA HEMATOPOIESIS EARLY PROGENITOR                                         | 489 | 0.40054  | 1.875404 | <0.0001  | 0.016353 |
| ELVIDGE HIF1A TARGETS UP                                                       | 63  | 0.53071  | 1.873746 | 0.004237 | 0.016613 |
| REACTOME PROTEIN FOLDING                                                       | 51  | 0.543924 | 1.872548 | 0.007937 | 0.016777 |
| SAKAI TUMOR INFILTRATING MONOCYTES DN                                          | 79  | 0.544897 | 1.87183  | 0.004    | 0.016879 |
| YAO TEMPORAL RESPONSE TO PROGESTERONE CLUSTER 14                               | 134 | 0.547888 | 1.869837 | 0.008147 | 0.017238 |
| HOSHIDA LIVER CANCER SUBCLASS S2                                               | 113 | 0.532722 | 1.868546 | 0.008264 | 0.017413 |
| REACTOME PREFOLDIN MEDIATED TRANSFER OF SUBSTRATE TO CCT TRIC                  | 27  | 0.66543  | 1.868371 | 0.009671 | 0.017404 |
| PRAMOONJAGO SOX4 TARGETS DN                                                    | 50  | 0.569142 | 1.865758 | <0.0001  | 0.017844 |
| SHAFFER IRF4 TARGETS IN ACTIVATED DENDRITIC CELL                               | 61  | 0.530798 | 1.865253 | <0.0001  | 0.017882 |
| CHICAS RB1 TARGETS LOW SERUM                                                   | 84  | 0.561924 | 1.863312 | 0.001965 | 0.018225 |
| SMID BREAST CANCER RELAPSE IN LUNG UP                                          | 20  | 0.663588 | 1.86314  | <0.0001  | 0.018203 |
| CONCANNON APOPTOSIS BY EPOXOMICIN DN                                           | 159 | 0.454962 | 1.860777 | <0.0001  | 0.018625 |
| NAGY TFTC COMPONENTS HUMAN                                                     | 18  | 0.670555 | 1.860558 | 0.003984 | 0.018631 |
| KEGG BASAL TRANSCRIPTION FACTORS                                               | 35  | 0.567192 | 1.857848 | <0.0001  | 0.019076 |
| CHAUHAN RESPONSE TO METHOXYESTRADIOL UP                                        | 50  | 0.553921 | 1.857844 | 0.004115 | 0.019031 |
| NEMETH INFLAMMATORY RESPONSE LPS DN                                            | 32  | 0.551292 | 1.856437 | 0.003953 | 0.019248 |
| REACTOME ASSEMBLY OF THE PRE REPLICATIVE COMPLEX                               | 63  | 0.695611 | 1.854654 | 0.011881 | 0.019536 |
| REACTOME CHROMOSOME MAINTENANCE                                                | 112 | 0.650034 | 1.854429 | 0.001946 | 0.01954  |
| COLLIS PRKDC SUBSTRATES                                                        | 19  | 0.664233 | 1.848502 | <0.0001  | 0.020772 |
| BROWNE HCMV INFECTION 48HR UP                                                  | 174 | 0.400962 | 1.848036 | <0.0001  | 0.020807 |

|                                                                                                                   |     |          |          |          |          |
|-------------------------------------------------------------------------------------------------------------------|-----|----------|----------|----------|----------|
| BILD E2F3 ONCOGENIC SIGNATURE                                                                                     | 222 | 0.418463 | 1.847621 | 0.004082 | 0.020841 |
| PEDERSEN METASTASIS BY ERBB2 ISOFORM 7                                                                            | 362 | 0.388932 | 1.847026 | <0.0001  | 0.0209   |
| HUANG GATA2 TARGETS DN                                                                                            | 67  | 0.465132 | 1.845021 | <0.0001  | 0.021251 |
| REACTOME ORC1 REMOVAL FROM CHROMATIN                                                                              | 65  | 0.675034 | 1.844886 | 0.009785 | 0.02123  |
| REACTOME BASE EXCISION REPAIR                                                                                     | 19  | 0.704913 | 1.844277 | <0.0001  | 0.021293 |
| DOANE BREAST CANCER CLASSES DN                                                                                    | 32  | 0.603842 | 1.842963 | 0.004141 | 0.02152  |
| DAZARD RESPONSE TO UV SCC DN                                                                                      | 119 | 0.474362 | 1.836879 | 0.002033 | 0.022798 |
| COLLER MYC TARGETS UP                                                                                             | 25  | 0.710431 | 1.834533 | <0.0001  | 0.023313 |
| CUI GLUCOSE DEPRIVATION                                                                                           | 58  | 0.521446 | 1.833758 | <0.0001  | 0.023464 |
| YANG BREAST CANCER ESRI BULK DN                                                                                   | 22  | 0.610128 | 1.832945 | 0.005825 | 0.023609 |
| VANDESLUIS COMMD1 TARGETS GROUP 2 UP                                                                              | 15  | 0.656657 | 1.832333 | 0.005906 | 0.023735 |
| MARIADASON REGULATED BY HISTONE ACETYLATION DN                                                                    | 48  | 0.483704 | 1.827729 | 0.004016 | 0.024793 |
| KATSANOUE ELAVL1 TARGETS DN                                                                                       | 141 | 0.418613 | 1.827106 | <0.0001  | 0.024898 |
| CAFFAREL RESPONSE TO THC 24HR 5 UP                                                                                | 30  | 0.632439 | 1.825481 | 0.006098 | 0.025289 |
| FAELT B CLL WITH VH3 21 UP                                                                                        | 42  | 0.589339 | 1.824419 | 0.00956  | 0.025547 |
| REACTOME MRNA SPLICING MINOR PATHWAY                                                                              | 40  | 0.634329 | 1.824131 | 0.006024 | 0.025595 |
| LEE CALORIE RESTRICTION NEOCORTEX DN                                                                              | 83  | 0.447936 | 1.821395 | 0.001942 | 0.026196 |
| BIOCARTA P53 PATHWAY                                                                                              | 16  | 0.633242 | 1.820757 | 0.004024 | 0.026289 |
| BERTUCCI MEDULLARY VS DUCTAL BREAST CANCER UP                                                                     | 187 | 0.493624 | 1.820208 | 0.009921 | 0.026348 |
| PID FOXO PATHWAY                                                                                                  | 49  | 0.504749 | 1.819531 | 0.003937 | 0.026468 |
| NGUYEN NOTCH1 TARGETS DN                                                                                          | 84  | 0.45355  | 1.817667 | 0.006237 | 0.026969 |
| RASHI RESPONSE TO IONIZING RADIATION 4                                                                            | 57  | 0.454953 | 1.815458 | <0.0001  | 0.027471 |
| SESTO RESPONSE TO UV C4                                                                                           | 20  | 0.619513 | 1.81434  | 0.00404  | 0.027691 |
| DAIRKEE CANCER PRONE RESPONSE BPA E2                                                                              | 113 | 0.462271 | 1.813857 | <0.0001  | 0.027744 |
| DITTMER PTHLH TARGETS UP                                                                                          | 110 | 0.46692  | 1.813625 | 0.003968 | 0.027767 |
| PENG GLUCOSE DEPRIVATION DN                                                                                       | 163 | 0.425335 | 1.810238 | <0.0001  | 0.028716 |
| GRADE METASTASIS DN                                                                                               | 42  | 0.621716 | 1.808554 | 0.003992 | 0.029112 |
| CAFFAREL RESPONSE TO THC DN                                                                                       | 29  | 0.654343 | 1.80552  | 0.012072 | 0.029849 |
| GINESTIER BREAST CANCER 20Q13 AMPLIFICATION DN                                                                    | 151 | 0.503784 | 1.80388  | 0.022222 | 0.030246 |
| TOMIDA METASTASIS UP                                                                                              | 26  | 0.59838  | 1.803788 | 0.013645 | 0.030205 |
| SMITH TERT TARGETS UP                                                                                             | 141 | 0.440728 | 1.803614 | 0.004024 | 0.030182 |
| KEGG NUCLEOTIDE EXCISION REPAIR                                                                                   | 44  | 0.57315  | 1.803144 | 0.012097 | 0.030254 |
| SANSOM APC TARGETS UP                                                                                             | 113 | 0.431182 | 1.802453 | <0.0001  | 0.030369 |
| SANSOM APC TARGETS REQUIRE MYC                                                                                    | 192 | 0.456086 | 1.802067 | 0.003929 | 0.03042  |
| WANG LMO4 TARGETS DN                                                                                              | 326 | 0.418273 | 1.802056 | <0.0001  | 0.030356 |
| REACTOME TRANSCRIPTIONAL ACTIVITY OF SMAD2 SMAD3 SMAD4 HETEROTRIMER                                               | 36  | 0.544208 | 1.801772 | 0.006036 | 0.030366 |
| SENGUPTA NASOPHARYNGEAL CARCINOMA WITH LMP1 UP                                                                    | 375 | 0.442444 | 1.801458 | <0.0001  | 0.030403 |
| SILIGAN TARGETS OF EWS FLI1 FUSION DN                                                                             | 17  | 0.634452 | 1.800188 | 0.004167 | 0.030704 |
| GARGALOVIC RESPONSE TO OXIDIZED PHOSPHOLIPIDS RED UP                                                              | 16  | 0.676106 | 1.799742 | 0.01002  | 0.03076  |
| REACTOME APC C CDH1 MEDIATED DEGRADATION OF CDC20 AND OTHER APC C CDH1 TARGETED PROTEINS IN LATE MITOSIS EARLY G1 | 64  | 0.656154 | 1.799011 | 0.009804 | 0.030907 |
| SENESE HDAC1 TARGETS UP                                                                                           | 425 | 0.437943 | 1.797798 | 0.009709 | 0.031177 |
| JAZAG TGFBI SIGNALING UP                                                                                          | 104 | 0.414879 | 1.796938 | <0.0001  | 0.03138  |
| REACTOME APC C CDC20 MEDIATED DEGRADATION OF MITOTIC PROTEINS                                                     | 65  | 0.662565 | 1.796022 | 0.007874 | 0.031625 |
| MULLIGAN NTF3 SIGNALING VIA INSR AND IGF1R UP                                                                     | 23  | 0.616338 | 1.793555 | 0.00198  | 0.03224  |



|                                                                                          |     |          |          |          |          |
|------------------------------------------------------------------------------------------|-----|----------|----------|----------|----------|
| BROWN MYELOID CELL DEVELOPMENT DN                                                        | 119 | 0.42822  | 1.792586 | 0.002008 | 0.032431 |
| KIM MYCL1 AMPLIFICATION TARGETS DN                                                       | 19  | 0.599645 | 1.79035  | 0.007859 | 0.033071 |
| REACTOME POST CHAPERONIN TUBULIN FOLDING PATHWAY                                         | 18  | 0.647657 | 1.789697 | 0.011928 | 0.033205 |
| REACTOME ANTIGEN PROCESSING UBIQUITINATION<br>PROTEASOME DEGRADATION                     | 192 | 0.45398  | 1.789484 | 0.006024 | 0.033225 |
| SA G1 AND S PHASES                                                                       | 15  | 0.6574   | 1.788893 | 0.005964 | 0.033355 |
| ZHANG RESPONSE TO IKK INHIBITOR AND TNF DN                                               | 100 | 0.450021 | 1.788685 | 0.004167 | 0.033329 |
| VERHAAK GLIOBLASTOMA PRONEURAL                                                           | 167 | 0.481945 | 1.787275 | 0.009921 | 0.033671 |
| LASTOWSKA NEUROBLASTOMA COPY NUMBER UP                                                   | 163 | 0.49957  | 1.786955 | 0.018762 | 0.033691 |
| WEIGEL OXIDATIVE STRESS BY HNE AND H2O2                                                  | 39  | 0.497943 | 1.785722 | 0.005871 | 0.034037 |
| PIONTEK PKD1 TARGETS DN                                                                  | 16  | 0.66367  | 1.783604 | 0.01     | 0.034663 |
| MAYBURD RESPONSE TO L663536 UP                                                           | 27  | 0.52913  | 1.783244 | 0.003992 | 0.03471  |
| WATANABE COLON CANCER MSI VS MSS UP                                                      | 27  | 0.545412 | 1.781706 | 0.004032 | 0.035103 |
| CHIN BREAST CANCER COPY NUMBER UP                                                        | 24  | 0.629027 | 1.781215 | 0.008032 | 0.035183 |
| STANELLE E2F1 TARGETS                                                                    | 27  | 0.522403 | 1.778581 | 0.007968 | 0.03596  |
| MARTORIATI MDM4 TARGETS FETAL LIVER DN                                                   | 495 | 0.412415 | 1.778176 | 0.002053 | 0.036003 |
| TOOKER GEMCITABINE RESISTANCE DN                                                         | 119 | 0.454145 | 1.776444 | 0.008    | 0.0365   |
| KAMMINGA SENESENCE                                                                       | 39  | 0.513728 | 1.775628 | 0.013514 | 0.036659 |
| LOCKWOOD AMPLIFIED IN LUNG CANCER                                                        | 205 | 0.472079 | 1.773483 | 0.016632 | 0.037359 |
| BENPORATH OCT4 TARGETS                                                                   | 274 | 0.380914 | 1.77203  | <0.0001  | 0.037773 |
| DAZARD RESPONSE TO UV NHEK DN                                                            | 301 | 0.480219 | 1.771112 | 0.035573 | 0.038047 |
| GRESHOCK CANCER COPY NUMBER UP                                                           | 313 | 0.399372 | 1.769583 | <0.0001  | 0.038534 |
| REACTOME ASSOCIATION OF TRIC CCT WITH TARGET<br>PROTEINS DURING BIOSYNTHESIS             | 26  | 0.550117 | 1.768524 | 0.012097 | 0.038838 |
| MATSUDA NATURAL KILLER DIFFERENTIATION                                                   | 455 | 0.361808 | 1.76741  | <0.0001  | 0.039152 |
| BONOME OVARIAN CANCER POOR SURVIVAL DN                                                   | 20  | 0.614894 | 1.766414 | 0.011834 | 0.039404 |
| REACTOME RESOLUTION OF AP SITES VIA THE MULTIPLE<br>NUCLEOTIDE PATCH REPLACEMENT PATHWAY | 17  | 0.700982 | 1.763146 | 0.002016 | 0.04048  |
| REACTOME TRANSCRIPTION COUPLED NER TC NER                                                | 43  | 0.573218 | 1.761344 | 0.024242 | 0.041027 |
| MMS MOUSE LYMPH HIGH 4HRS UP                                                             | 31  | 0.593276 | 1.760869 | 0.015748 | 0.041122 |
| NIKOLSKY BREAST CANCER 12Q24 AMPLICON                                                    | 15  | 0.786594 | 1.760698 | 0.013972 | 0.041126 |
| DORMOY ELAVL1 TARGETS                                                                    | 16  | 0.636704 | 1.76029  | 0.006211 | 0.041206 |
| OUELLET CULTURED OVARIAN CANCER INVASIVE VS LMP<br>UP                                    | 65  | 0.510015 | 1.758884 | 0.002096 | 0.041618 |
| YANAGIHARA ESX1 TARGETS                                                                  | 29  | 0.558055 | 1.757296 | 0.004167 | 0.042167 |
| RAHMAN TP53 TARGETS PHOSPHORYLATED                                                       | 21  | 0.696858 | 1.75633  | 0.010142 | 0.042431 |
| ZHANG RESPONSE TO CANTHARIDIN DN                                                         | 67  | 0.586782 | 1.756311 | 0.013861 | 0.042349 |
| BURTON ADIPOGENESIS 12                                                                   | 31  | 0.633779 | 1.756028 | 0.020704 | 0.042374 |
| LIAO HAVE SOX4 BINDING SITES                                                             | 40  | 0.487452 | 1.754347 | 0.006276 | 0.042969 |
| HEIDENBLAD AMPLICON 8Q24 UP                                                              | 34  | 0.506113 | 1.754154 | 0.005747 | 0.042956 |
| WANG TUMOR INVASIVENESS UP                                                               | 362 | 0.422517 | 1.753477 | 0.007692 | 0.043095 |
| FARMER BREAST CANCER BASAL VS LULMINAL                                                   | 317 | 0.372322 | 1.751602 | <0.0001  | 0.043758 |
| CAFFAREL RESPONSE TO THC 24HR 5 DN                                                       | 55  | 0.5424   | 1.750371 | 0.01751  | 0.044157 |
| KENNY CTNNB1 TARGETS UP                                                                  | 46  | 0.466248 | 1.749652 | <0.0001  | 0.044315 |
| GENTILE UV RESPONSE CLUSTER D8                                                           | 39  | 0.555961 | 1.749345 | 0.004274 | 0.044325 |
| MORI SMALL PRE BII LYMPHOCYTE DN                                                         | 74  | 0.441043 | 1.747196 | 0.011583 | 0.045    |
| SCHAEFFER PROSTATE DEVELOPMENT 6HR DN                                                    | 482 | 0.37942  | 1.746934 | 0.003953 | 0.045025 |
| PANGAS TUMOR SUPPRESSION BY SMAD1 AND SMAD5 DN                                           | 142 | 0.385688 | 1.746443 | 0.002058 | 0.045144 |
| GARGALOVIC RESPONSE TO OXIDIZED PHOSPHOLIPIDS                                            | 31  | 0.575021 | 1.746114 | 0.012346 | 0.045182 |

|                                                                              |     |          |          |          |          |
|------------------------------------------------------------------------------|-----|----------|----------|----------|----------|
| YELLOW UP                                                                    |     |          |          |          |          |
| ELVIDGE HIF1A AND HIF2A TARGETS UP                                           | 38  | 0.532076 | 1.745029 | 0.008214 | 0.045525 |
| HEDENFALK BREAST CANCER HEREDITARY VS SPORADIC                               | 46  | 0.510439 | 1.744883 | 0.012931 | 0.045492 |
| DING LUNG CANCER EXPRESSION BY COPY NUMBER                                   | 96  | 0.522323 | 1.741925 | 0.02079  | 0.04658  |
| SYED ESTRADIOL RESPONSE                                                      | 19  | 0.567053 | 1.741695 | 0.003914 | 0.046594 |
| YAO TEMPORAL RESPONSE TO PROGESTERONE CLUSTER 10                             | 64  | 0.554322 | 1.738372 | 0.009862 | 0.047833 |
| KORKOLA TERATOMA                                                             | 39  | 0.521538 | 1.736379 | 0.002066 | 0.048542 |
| BENPORATH NOS TARGETS                                                        | 167 | 0.394158 | 1.735487 | <0.0001  | 0.048808 |
| REACTOME RNA POL II PRE TRANSCRIPTION EVENTS                                 | 51  | 0.536591 | 1.73453  | 0.022088 | 0.049143 |
| PID PI3KCI AKT PATHWAY                                                       | 35  | 0.517671 | 1.730794 | 0.008547 | 0.050573 |
| BLALOCK ALZHEIMERS DISEASE INCIPIENT DN                                      | 161 | 0.423464 | 1.729327 | <0.0001  | 0.051089 |
| AMUNDSON RESPONSE TO ARSENITE                                                | 211 | 0.361445 | 1.728605 | 0.002041 | 0.051243 |
| GRYDER PAX3FOXO1 TOP ENHANCERS                                               | 429 | 0.380099 | 1.726814 | 0.00202  | 0.051803 |
| MILI PSEUDOPODIA HAPTOTAXIS UP                                               | 483 | 0.478654 | 1.726012 | 0.020833 | 0.052022 |
| YIH RESPONSE TO ARSENITE C3                                                  | 35  | 0.513379 | 1.724346 | 0.013514 | 0.052628 |
| GOTZMANN EPITHELIAL TO MESENCHYMAL TRANSITION UP                             | 68  | 0.49008  | 1.724127 | 0.024048 | 0.052635 |
| SANSOM APC TARGETS                                                           | 192 | 0.370204 | 1.724123 | <0.0001  | 0.052533 |
| REACTOME SIGNALING BY TGF BETA RECEPTOR COMPLEX                              | 60  | 0.476028 | 1.724074 | 0.013672 | 0.052459 |
| BIOCARTA TEL PATHWAY                                                         | 18  | 0.594007 | 1.724068 | 0.017822 | 0.052363 |
| GAZIN EPIGENETIC SILENCING BY KRAS                                           | 24  | 0.530104 | 1.721906 | 0.016949 | 0.053168 |
| KARAKAS TGFBI SIGNALING                                                      | 18  | 0.653596 | 1.721183 | 0.018256 | 0.053392 |
| REACTOME REGULATION OF MRNA STABILITY BY PROTEINS THAT BIND AU RICH ELEMENTS | 81  | 0.534093 | 1.720097 | 0.023762 | 0.053774 |
| JIANG VHL TARGETS                                                            | 130 | 0.424455 | 1.717976 | 0.00404  | 0.054626 |
| REACTOME DESTABILIZATION OF MRNA BY AUF1 HNRNP D0                            | 50  | 0.639686 | 1.717617 | 0.029412 | 0.054663 |
| KEGG PYRIMIDINE METABOLISM                                                   | 96  | 0.471784 | 1.716585 | 0.016097 | 0.054958 |
| MARKS HDAC TARGETS DN                                                        | 15  | 0.636935 | 1.716012 | 0.009615 | 0.055123 |
| REACTOME CDT1 ASSOCIATION WITH THE CDC6 ORC ORIGIN COMPLEX                   | 54  | 0.65589  | 1.716    | 0.025591 | 0.055023 |
| KEGG RNA DEGRADATION                                                         | 56  | 0.51927  | 1.715115 | 0.026477 | 0.055308 |
| ENK UV RESPONSE EPIDERMIS UP                                                 | 277 | 0.396653 | 1.71478  | 0.003839 | 0.055362 |
| SANSOM APC MYC TARGETS                                                       | 198 | 0.391441 | 1.714559 | 0.003953 | 0.055379 |
| TAYLOR METHYLATED IN ACUTE LYMPHOBLASTIC LEUKEMIA                            | 73  | 0.449887 | 1.713326 | 0.008032 | 0.055865 |
| SMID BREAST CANCER RELAPSE IN BONE DN                                        | 293 | 0.393585 | 1.712422 | 0.002008 | 0.05618  |
| ZEMBUTSU SENSITIVITY TO METHOTREXATE                                         | 16  | 0.585476 | 1.711834 | 0.006122 | 0.056327 |
| BONCI TARGETS OF MIR15A AND MIR16 1                                          | 88  | 0.455043 | 1.709993 | 0.015779 | 0.057015 |
| ZUCCHI METASTASIS UP                                                         | 38  | 0.508496 | 1.709634 | 0.005803 | 0.05706  |
| ALFANO MYC TARGETS                                                           | 230 | 0.384211 | 1.709342 | 0.006085 | 0.057078 |
| WATANABE RECTAL CANCER RADIOTHERAPY RESPONSIVE DN                            | 89  | 0.448667 | 1.708183 | 0.014286 | 0.057529 |
| RICKMAN TUMOR DIFFERENTIATED WELL VS POORLY UP                               | 219 | 0.44463  | 1.707944 | 0.022267 | 0.057539 |
| REACTOME SHC1 EVENTS IN EGFR SIGNALING                                       | 15  | 0.626948 | 1.70774  | 0.011765 | 0.057526 |
| REACTOME CLASS I MHC MEDIATED ANTIGEN PROCESSING PRESENTATION                | 229 | 0.413844 | 1.706487 | 0.007767 | 0.058032 |
| FERRANDO HOX11 NEIGHBORS                                                     | 23  | 0.62554  | 1.706106 | 0.022    | 0.058088 |
| MCBRYAN PUBERTAL BREAST 6 7WK DN                                             | 76  | 0.426278 | 1.705047 | 0.00396  | 0.058458 |
| BURTON ADIPOGENESIS PEAK AT 8HR                                              | 39  | 0.494526 | 1.703544 | 0.015717 | 0.059112 |
| REACTOME AUTODEGRADATION OF CDH1 BY CDH1 APC C                               | 56  | 0.628255 | 1.703088 | 0.021442 | 0.059224 |
| DORN ADENOVIRUS INFECTION 12HR DN                                            | 33  | 0.505449 | 1.702581 | 0.013566 | 0.059348 |
| VETTER TARGETS OF PRKCA AND ETS1 UP                                          | 15  | 0.603878 | 1.701816 | 0.021739 | 0.059581 |

|                                                                   |     |          |          |          |          |
|-------------------------------------------------------------------|-----|----------|----------|----------|----------|
| SAKAI CHRONIC HEPATITIS VS LIVER CANCER UP                        | 79  | 0.497029 | 1.70124  | 0.020243 | 0.059765 |
| PID MYC PATHWAY                                                   | 25  | 0.551098 | 1.700995 | 0.019231 | 0.05978  |
| REACTOME TRANSCRIPTION                                            | 188 | 0.5167   | 1.70089  | 0.030769 | 0.059728 |
| PID BETA CATENIN NUC PATHWAY                                      | 74  | 0.428773 | 1.699252 | <0.0001  | 0.060403 |
| BIOCARTA CASPASE PATHWAY                                          | 23  | 0.546091 | 1.69897  | 0.022634 | 0.060432 |
| REACTOME AMINO ACID SYNTHESIS AND INTERCONVERSION TRANSAMINATION  | 15  | 0.639634 | 1.698237 | 0.02045  | 0.060687 |
| BIOCARTA TNFR1 PATHWAY                                            | 29  | 0.499905 | 1.693128 | 0.009901 | 0.062986 |
| AZARE STAT3 TARGETS                                               | 23  | 0.578007 | 1.692447 | 0.034951 | 0.063226 |
| KEGG GLYOXYLATE AND DICARBOXYLATE METABOLISM                      | 16  | 0.621381 | 1.692134 | 0.021401 | 0.063253 |
| HOFMANN CELL LYMPHOMA UP                                          | 46  | 0.47245  | 1.690977 | 0.019841 | 0.063748 |
| PODAR RESPONSE TO ADAPHOSTIN DN                                   | 18  | 0.625287 | 1.690159 | 0.03     | 0.063966 |
| KEGG SMALL CELL LUNG CANCER                                       | 84  | 0.424916 | 1.690009 | 0.009671 | 0.063918 |
| REACTOME APOPTOSIS                                                | 141 | 0.441803 | 1.688153 | 0.014141 | 0.064708 |
| KIM WT1 TARGETS 8HR DN                                            | 114 | 0.367602 | 1.687968 | <0.0001  | 0.064702 |
| BROWNE HCMV INFECTION 18HR UP                                     | 171 | 0.40397  | 1.687676 | 0.00625  | 0.064768 |
| REACTOME DOWNREGULATION OF SMAD2 3 SMAD4 TRANSCRIPTIONAL ACTIVITY | 19  | 0.58538  | 1.687628 | 0.021442 | 0.064689 |
| IVANOVA HEMATOPOIESIS STEM CELL SHORT TERM                        | 29  | 0.506089 | 1.687402 | 0.01378  | 0.064653 |
| DEBIASI APOPTOSIS BY REOVIRUS INFECTION UP                        | 303 | 0.423488 | 1.687207 | 0.008351 | 0.064646 |
| BOYALT LIVER CANCER SUBCLASS G2                                   | 27  | 0.495766 | 1.686316 | 0.004008 | 0.064983 |
| LIN MELANOMA COPY NUMBER UP                                       | 67  | 0.473821 | 1.686184 | 0.017822 | 0.064929 |
| KOINUMA COLON CANCER MSI UP                                       | 16  | 0.626124 | 1.686045 | 0.013699 | 0.064876 |
| MILI PSEUDOPODIA CHEMOTAXIS UP                                    | 69  | 0.429895 | 1.684119 | 0.010267 | 0.065686 |
| PROVENZANI METASTASIS UP                                          | 183 | 0.40015  | 1.683638 | 0.009804 | 0.065785 |
| MARZEC IL2 SIGNALING UP                                           | 110 | 0.422339 | 1.682607 | 0.013436 | 0.066183 |
| FIRESTEIN CTNBN1 PATHWAY                                          | 32  | 0.494589 | 1.682464 | 0.011605 | 0.066128 |
| SCHAEFFER SOX9 TARGETS IN PROSTATE DEVELOPMENT DN                 | 44  | 0.519023 | 1.682038 | 0.031373 | 0.066261 |
| XU CREBBP TARGETS UP                                              | 24  | 0.534615 | 1.679093 | 0.01232  | 0.067797 |
| SHAFFER IRF4 TARGETS IN MYELOMA VS MATURE B LYMPHOCYTE            | 99  | 0.445432 | 1.677055 | 0.022    | 0.06873  |
| KOKKINAKIS METHIONINE DEPRIVATION 48HR DN                         | 64  | 0.42631  | 1.676694 | 0.011696 | 0.068758 |
| REACTOME GLYCOLYSIS                                               | 25  | 0.579583 | 1.676492 | 0.031068 | 0.068741 |
| REACTOME P53 INDEPENDENT G1 S DNA DAMAGE CHECKPOINT               | 48  | 0.638372 | 1.676365 | 0.023904 | 0.068702 |
| WEST ADRENOCORTICAL CARCINOMA VS ADENOMA UP                       | 18  | 0.568753 | 1.674831 | 0.017893 | 0.06942  |
| REACTOME CYCLIN E ASSOCIATED EVENTS DURING G1 S TRANSITION        | 62  | 0.599862 | 1.67442  | 0.039216 | 0.069487 |
| HASLINGER B CLL WITH CHROMOSOME 12 TRISOMY                        | 22  | 0.589413 | 1.674138 | 0.029586 | 0.069513 |
| KEGG P53 SIGNALING PATHWAY                                        | 66  | 0.437661 | 1.671067 | 0.015905 | 0.071007 |
| BHAT ESRI TARGETS VIA AKT1 UP                                     | 267 | 0.383494 | 1.671063 | 0.019194 | 0.070885 |
| ELVIDGE HYPOXIA BY DMOG DN                                        | 54  | 0.442393 | 1.670696 | 0.008264 | 0.070981 |
| SMID BREAST CANCER RELAPSE IN BRAIN UP                            | 39  | 0.507199 | 1.670125 | 0.016227 | 0.071179 |
| REACTOME DESTABILIZATION OF MRNA BY KSRP                          | 17  | 0.583577 | 1.669474 | 0.022177 | 0.071476 |
| ZHENG IL22 SIGNALING DN                                           | 37  | 0.459242 | 1.669029 | 0.012371 | 0.071538 |
| DE YY1 TARGETS DN                                                 | 90  | 0.469888 | 1.666946 | 0.028    | 0.072512 |
| REACTOME NUCLEOTIDE EXCISION REPAIR                               | 48  | 0.520226 | 1.66664  | 0.034553 | 0.07257  |
| GAJATE RESPONSE TO TRABECTEDIN DN                                 | 18  | 0.591151 | 1.664867 | 0.023346 | 0.073436 |
| FARMER BREAST CANCER CLUSTER 5                                    | 18  | 0.732468 | 1.663821 | 0.033865 | 0.073843 |

|                                                                 |     |          |          |          |          |
|-----------------------------------------------------------------|-----|----------|----------|----------|----------|
| REACTOME G1 PHASE                                               | 35  | 0.50546  | 1.662827 | 0.023529 | 0.074266 |
| TCGA GLIOBLASTOMA COPY NUMBER UP                                | 66  | 0.467425 | 1.660534 | 0.018828 | 0.07536  |
| STAMBOLSKY TARGETS OF MUTATED TP53 UP                           | 46  | 0.447634 | 1.660451 | 0.008114 | 0.075257 |
| OUILLETTE CLL 13Q14 DELETION UP                                 | 69  | 0.427047 | 1.659901 | 0.013514 | 0.075401 |
| PID RB 1PATHWAY                                                 | 65  | 0.42723  | 1.659408 | 0.011811 | 0.075576 |
| DOANE RESPONSE TO ANDROGEN DN                                   | 225 | 0.348679 | 1.659151 | 0.001949 | 0.075572 |
| REACTOME P53 DEPENDENT G1 DNA DAMAGE RESPONSE                   | 53  | 0.604504 | 1.65892  | 0.035785 | 0.075585 |
| HAHTOLA SEZARY SYNDROM UP                                       | 92  | 0.430003 | 1.658449 | 0.015656 | 0.075731 |
| GAZDA DIAMOND BLACKFAN ANEMIA PROGENITOR DN                     | 62  | 0.475799 | 1.65785  | 0.01848  | 0.075901 |
| KEGG PROTEASOME                                                 | 42  | 0.651967 | 1.65695  | 0.029412 | 0.076312 |
| KIM WT1 TARGETS 12HR DN                                         | 200 | 0.391558 | 1.656898 | 0.005976 | 0.07619  |
| SIG REGULATION OF THE ACTIN CYTOSKELETON BY RHO GTPASES         | 34  | 0.524591 | 1.655948 | 0.035928 | 0.076606 |
| TSENG IRS1 TARGETS UP                                           | 106 | 0.403401 | 1.653592 | 0.018293 | 0.077854 |
| WIERENGA PML INTERACTOME                                        | 40  | 0.513588 | 1.652293 | 0.025845 | 0.078457 |
| OSMAN BLADDER CANCER UP                                         | 383 | 0.398818 | 1.651791 | 0.029183 | 0.078594 |
| MCBRYAN PUBERTAL BREAST 5 6WK DN                                | 127 | 0.400125 | 1.65131  | 0.017578 | 0.078743 |
| BHAT ESRI TARGETS NOT VIA AKT1 UP                               | 204 | 0.376136 | 1.650532 | 0.007634 | 0.079063 |
| RAY TUMORIGENESIS BY ERBB2 CDC25A UP                            | 99  | 0.381187 | 1.650404 | 0.003839 | 0.079009 |
| SCHLOSSER MYC AND SERUM RESPONSE SYNERGY                        | 31  | 0.590989 | 1.648224 | 0.036735 | 0.080162 |
| SHIN B CELL LYMPHOMA CLUSTER 8                                  | 36  | 0.530104 | 1.646891 | 0.023952 | 0.080756 |
| WONG ENDMETRIUM CANCER UP                                       | 25  | 0.519694 | 1.644474 | 0.009804 | 0.082115 |
| FLECHNER PBL KIDNEY TRANSPLANT REJECTED VS OK UP                | 62  | 0.41146  | 1.643248 | 0.008016 | 0.082744 |
| AMUNDSON GENOTOXIC SIGNATURE                                    | 99  | 0.3757   | 1.640345 | 0.011905 | 0.084355 |
| LIU VMYB TARGETS UP                                             | 114 | 0.382195 | 1.639758 | 0.010526 | 0.084548 |
| MARIADASON RESPONSE TO BUTYRATE SULINDAC 6                      | 46  | 0.474213 | 1.639427 | 0.031373 | 0.084617 |
| HOFMANN MYELODYSPLASTIC SYNDROM LOW RISK DN                     | 30  | 0.531183 | 1.638773 | 0.031621 | 0.084872 |
| FLOTHO PEDIATRIC ALL THERAPY RESPONSE DN                        | 27  | 0.499248 | 1.636458 | 0.021401 | 0.086038 |
| POMEROY MEDULLOBLASTOMA PROGNOSIS DN                            | 43  | 0.57809  | 1.635835 | 0.049801 | 0.086282 |
| KUMAR PATHOGEN LOAD BY MACROPHAGES                              | 245 | 0.321681 | 1.635697 | <0.0001  | 0.08622  |
| ZHONG RESPONSE TO AZACITIDINE AND TSA DN                        | 63  | 0.465464 | 1.635426 | 0.033663 | 0.086261 |
| STEIN ESRRA TARGETS RESPONSIVE TO ESTROGEN UP                   | 29  | 0.484024 | 1.633561 | 0.025641 | 0.087285 |
| KORKOLA YOLK SAC TUMOR UP                                       | 19  | 0.643292 | 1.632927 | 0.040777 | 0.087605 |
| GOLDRATH HOMEOSTATIC PROLIFERATION                              | 163 | 0.42393  | 1.632349 | 0.025794 | 0.087816 |
| HU GENOTOXIN ACTION DIRECT VS INDIRECT 24HR                     | 51  | 0.45042  | 1.631855 | 0.014228 | 0.087994 |
| GEISS RESPONSE TO DSRNA DN                                      | 15  | 0.573206 | 1.631693 | 0.029703 | 0.087959 |
| BROWNE HCMV INFECTION 16HR UP                                   | 217 | 0.383509 | 1.631379 | 0.023605 | 0.08802  |
| RIZ ERYTHROID DIFFERENTIATION CCNE1                             | 39  | 0.466142 | 1.630702 | 0.010204 | 0.088318 |
| KIM TIAL1 TARGETS                                               | 31  | 0.504676 | 1.630118 | 0.020408 | 0.088558 |
| BROWNE HCMV INFECTION 20HR UP                                   | 230 | 0.348789 | 1.629245 | 0.006148 | 0.088915 |
| REACTOME SMAD2 SMAD3 SMAD4 HETEROTRIMER REGULATES TRANSCRIPTION | 25  | 0.519864 | 1.627145 | 0.024952 | 0.090188 |
| JAERVINEN AMPLIFIED IN LARYNGEAL CANCER                         | 37  | 0.478422 | 1.625893 | 0.030992 | 0.090827 |
| REACTOME INTRINSIC PATHWAY FOR APOPTOSIS                        | 29  | 0.526158 | 1.625654 | 0.030303 | 0.090809 |
| REACTOME CDK MEDIATED PHOSPHORYLATION AND REMOVAL OF CDC6       | 46  | 0.6389   | 1.624869 | 0.04     | 0.09111  |
| YAGI AML SURVIVAL                                               | 119 | 0.359624 | 1.623065 | 0.006048 | 0.092076 |
| ST FAS SIGNALING PATHWAY                                        | 63  | 0.399853 | 1.621458 | 0.025341 | 0.093009 |
| YIH RESPONSE TO ARSENITE C1                                     | 23  | 0.53364  | 1.62096  | 0.016495 | 0.093186 |

|                                                  |     |          |          |          |          |
|--------------------------------------------------|-----|----------|----------|----------|----------|
| LU EZH2 TARGETS DN                               | 356 | 0.367171 | 1.61638  | 0.010204 | 0.09598  |
| FARMER BREAST CANCER APOCRINE VS BASAL           | 316 | 0.346667 | 1.613765 | 0.011952 | 0.097569 |
| KAPOSI LIVER CANCER MET UP                       | 17  | 0.593801 | 1.613735 | 0.03012  | 0.097431 |
| BENPORATH MYC TARGETS WITH EBOX                  | 219 | 0.370799 | 1.612224 | 0.017751 | 0.098274 |
| DITTMER PTHLH TARGETS DN                         | 72  | 0.419333 | 1.612067 | 0.014257 | 0.098229 |
| PID DNA PK PATHWAY                               | 16  | 0.561749 | 1.611967 | 0.037849 | 0.098136 |
| CHENG IMPRINTED BY ESTRADIOL                     | 100 | 0.36815  | 1.609978 | 0.008    | 0.099279 |
| HOLLEMAN PREDNISOLONE RESISTANCE B ALL UP        | 22  | 0.561948 | 1.608265 | 0.049505 | 0.100329 |
| BUKANOVICH T LYMPHOCYTE HOMING ON TUMOR DN       | 19  | 0.51839  | 1.607094 | 0.025794 | 0.100969 |
| KAN RESPONSE TO ARSENIC TRIOXIDE                 | 118 | 0.412375 | 1.605869 | 0.023622 | 0.10133  |
| TERAO AOX4 TARGETS SKIN UP                       | 35  | 0.463012 | 1.605396 | 0.035019 | 0.101492 |
| FLECHNER BIOPSY KIDNEY TRANSPLANT OK VS DONOR DN | 25  | 0.476014 | 1.605174 | 0.018868 | 0.10146  |
| WOOD EBV EBNA1 TARGETS UP                        | 109 | 0.398263 | 1.604507 | 0.024242 | 0.101754 |
| AMIT SERUM RESPONSE 480 MCF10A                   | 34  | 0.522424 | 1.603219 | 0.038697 | 0.102526 |
| PARK HSC VS MULTIPOTENT PROGENITORS DN           | 18  | 0.541898 | 1.602923 | 0.035785 | 0.102521 |
| RIZ ERYTHROID DIFFERENTIATION HBZ                | 40  | 0.464598 | 1.602743 | 0.02268  | 0.102507 |
| BROWNE HCMV INFECTION 10HR UP                    | 95  | 0.36663  | 1.602081 | 0.011905 | 0.102773 |
| BYSTROEM CORRELATED WITH IL5 DN                  | 63  | 0.461639 | 1.602062 | 0.036145 | 0.102631 |
| NIELSEN LIPOSARCOMA DN                           | 19  | 0.500428 | 1.601659 | 0.037698 | 0.102737 |
| PID LKB1 PATHWAY                                 | 46  | 0.432082 | 1.601294 | 0.020161 | 0.102882 |
| BLUM RESPONSE TO SALIRASIB UP                    | 236 | 0.38965  | 1.599729 | 0.021956 | 0.103503 |
| REACTOME METABOLISM OF CARBOHYDRATES             | 228 | 0.355934 | 1.599639 | 0.00998  | 0.103413 |
| ZHU CMV 24 HR UP                                 | 93  | 0.423945 | 1.598979 | 0.031746 | 0.103689 |
| SMIRNOV RESPONSE TO IR 2HR DN                    | 52  | 0.43491  | 1.597758 | 0.03012  | 0.104412 |
| KANNAN TP53 TARGETS DN                           | 21  | 0.518352 | 1.59535  | 0.04251  | 0.105786 |
| CHEN HOXA5 TARGETS 9HR DN                        | 36  | 0.475814 | 1.593394 | 0.035565 | 0.106848 |
| STAMBOLSKY BOUND BY MUTATED TP53                 | 17  | 0.533212 | 1.592761 | 0.022495 | 0.107007 |
| JACKSON DNMT1 TARGETS DN                         | 24  | 0.555331 | 1.592614 | 0.046332 | 0.106936 |
| TIEN INTESTINE PROBIOTICS 6HR DN                 | 158 | 0.378613 | 1.590721 | 0.024845 | 0.108007 |
| REACTOME SIGNALING BY CONSTITUTIVELY ACTIVE EGFR | 17  | 0.545932 | 1.590347 | 0.037624 | 0.10814  |
| KIM MYC AMPLIFICATION TARGETS UP                 | 186 | 0.409196 | 1.590281 | 0.028455 | 0.108037 |
| WU HBX TARGETS 2 UP                              | 22  | 0.512302 | 1.590024 | 0.013462 | 0.108072 |
| SENESE HDAC3 TARGETS DN                          | 481 | 0.324994 | 1.589872 | 0.010438 | 0.108029 |
| SCHLOSSER SERUM RESPONSE AUGMENTED BY MYC        | 101 | 0.405214 | 1.588321 | 0.025845 | 0.108766 |
| HIRSCH CELLULAR TRANSFORMATION SIGNATURE DN      | 95  | 0.381182 | 1.586471 | 0.010267 | 0.109937 |
| WEI MIR34A TARGETS                               | 141 | 0.367921 | 1.585311 | 0.018182 | 0.110588 |
| DORSAM HOXA9 TARGETS UP                          | 35  | 0.446791 | 1.584984 | 0.024242 | 0.110671 |
| REACTOME PYRUVATE METABOLISM                     | 18  | 0.540195 | 1.582334 | 0.04065  | 0.112131 |
| QI HYPOXIA TARGETS OF HIF1A AND FOXA2            | 36  | 0.501433 | 1.582225 | 0.038986 | 0.112052 |
| LU TUMOR ANGIOGENESIS UP                         | 25  | 0.504791 | 1.582141 | 0.045098 | 0.111964 |
| SIG PIP3 SIGNALING IN CARDIAC MYOCTES            | 66  | 0.400405 | 1.581374 | 0.015564 | 0.112419 |
| MILI PSEUDOPODIA                                 | 41  | 0.424873 | 1.579452 | 0.030303 | 0.113724 |
| REACTOME DEADENYLATION DEPENDENT MRNA DECAY      | 42  | 0.491756 | 1.577539 | 0.039683 | 0.114976 |
| YANG BREAST CANCER ESR1 DN                       | 24  | 0.49262  | 1.576019 | 0.035928 | 0.115959 |
| BIOCARTA VEGF PATHWAY                            | 29  | 0.470594 | 1.575019 | 0.03937  | 0.116361 |
| PHONG TNF RESPONSE VIA P38 COMPLETE              | 221 | 0.345624 | 1.573374 | 0.007813 | 0.117145 |
| PID AR PATHWAY                                   | 61  | 0.409093 | 1.572359 | 0.025641 | 0.117706 |
| CONRAD STEM CELL                                 | 39  | 0.441007 | 1.568667 | 0.035789 | 0.119943 |
| TURASHVILI BREAST CARCINOMA DUCTAL VS LOBULAR UP | 19  | 0.528365 | 1.56845  | 0.026263 | 0.119939 |

|                                                        |     |          |          |          |          |
|--------------------------------------------------------|-----|----------|----------|----------|----------|
| WANG CLIM2 TARGETS UP                                  | 217 | 0.33065  | 1.567843 | 0.011173 | 0.120262 |
| ZHAN EARLY DIFFERENTIATION GENES DN                    | 42  | 0.478918 | 1.567609 | 0.035156 | 0.120259 |
| JOHNSTONE PARVB TARGETS 2 DN                           | 315 | 0.401319 | 1.567086 | 0.047817 | 0.120304 |
| KYNG ENVIRONMENTAL STRESS RESPONSE DN                  | 19  | 0.512273 | 1.566585 | 0.042084 | 0.120472 |
| REACTOME RNA POL I TRANSCRIPTION TERMINATION           | 19  | 0.597967 | 1.563401 | 0.043388 | 0.12267  |
| WANG RESPONSE TO FORSKOLIN UP                          | 22  | 0.51664  | 1.563149 | 0.036217 | 0.12269  |
| OZEN MIR125B1 TARGETS                                  | 25  | 0.477198 | 1.562725 | 0.036072 | 0.12285  |
| BAE BRCA1 TARGETS DN                                   | 32  | 0.448326 | 1.561732 | 0.027237 | 0.123436 |
| REACTOME PRE NOTCH EXPRESSION AND PROCESSING           | 38  | 0.438524 | 1.561665 | 0.028681 | 0.123334 |
| MULLIGHAN NPM1 MUTATED SIGNATURE 2 UP                  | 127 | 0.367212 | 1.560194 | 0.026157 | 0.124289 |
| PID DELTA NP63 PATHWAY                                 | 45  | 0.441436 | 1.55967  | 0.026585 | 0.124484 |
| LIU COMMON CANCER GENES                                | 67  | 0.39207  | 1.558317 | 0.012346 | 0.125208 |
| BYSTRYKH HEMATOPOIESIS STEM CELL AND BRAIN QTL TRANS   | 175 | 0.330511 | 1.557717 | 0.004082 | 0.125363 |
| GARGALOVIC RESPONSE TO OXIDIZED PHOSPHOLIPIDS GREEN DN | 22  | 0.488344 | 1.556341 | 0.044574 | 0.12629  |
| PID MTOR 4PATHWAY                                      | 69  | 0.39131  | 1.552611 | 0.047893 | 0.128754 |
| SPIELMAN LYMPHOBLAST EUROPEAN VS ASIAN UP              | 467 | 0.390019 | 1.55152  | 0.048096 | 0.129204 |
| SENESE HDAC1 AND HDAC2 TARGETS UP                      | 220 | 0.381878 | 1.547474 | 0.026871 | 0.131794 |
| AUNG GASTRIC CANCER                                    | 53  | 0.422567 | 1.546632 | 0.015968 | 0.132246 |
| DOANE BREAST CANCER ESR1 DN                            | 47  | 0.460401 | 1.545565 | 0.034483 | 0.132745 |
| HELLER HDAC TARGETS DN                                 | 275 | 0.341707 | 1.541225 | 0.023762 | 0.135545 |
| RICKMAN TUMOR DIFFERENTIATED MODERATELY VS POORLY UP   | 114 | 0.372841 | 1.540628 | 0.025918 | 0.135672 |
| PID PRL SIGNALING EVENTS PATHWAY                       | 23  | 0.490748 | 1.539611 | 0.043478 | 0.136331 |
| YEGNASUBRAMANIAN PROSTATE CANCER                       | 117 | 0.388272 | 1.539252 | 0.022267 | 0.136289 |
| WANG RESPONSE TO ANDROGEN UP                           | 27  | 0.493984 | 1.539088 | 0.032653 | 0.136262 |
| CEBALLOS TARGETS OF TP53 AND MYC DN                    | 37  | 0.428256 | 1.53883  | 0.016293 | 0.136301 |
| KYNG WERNER SYNDROM AND NORMAL AGING UP                | 87  | 0.374516 | 1.536424 | 0.017613 | 0.137926 |
| WANG TARGETS OF MLL CBP FUSION DN                      | 42  | 0.451813 | 1.536386 | 0.04008  | 0.137792 |
| KYNG ENVIRONMENTAL STRESS RESPONSE NOT BY 4NQO IN WS   | 39  | 0.400106 | 1.534646 | 0.032819 | 0.139045 |
| ZHU CMV ALL UP                                         | 119 | 0.39732  | 1.534112 | 0.037475 | 0.13933  |
| BRUINS UVC RESPONSE EARLY LATE                         | 292 | 0.32024  | 1.532619 | 0.008163 | 0.140356 |
| PID NFAT 3PATHWAY                                      | 53  | 0.411672 | 1.531804 | 0.048    | 0.140939 |
| LEE LIVER CANCER MYC UP                                | 51  | 0.412772 | 1.531745 | 0.046243 | 0.140802 |
| HOLLEMAN VINCRISTINE RESISTANCE ALL UP                 | 25  | 0.482779 | 1.529622 | 0.038618 | 0.142    |
| GENTILE UV RESPONSE CLUSTER D1                         | 18  | 0.508266 | 1.528893 | 0.04918  | 0.142424 |
| ROESSLER LIVER CANCER METASTASIS UP                    | 102 | 0.355223 | 1.52781  | 0.01378  | 0.142963 |
| LIANG HEMATOPOIESIS STEM CELL NUMBER LARGE VS TINY DN  | 40  | 0.419267 | 1.527717 | 0.034137 | 0.142837 |
| DACOSTA UV RESPONSE VIA ERCC3 XPCS UP                  | 25  | 0.471035 | 1.527198 | 0.042339 | 0.14272  |
| REACTOME SIGNALING BY SCF KIT                          | 75  | 0.389868 | 1.527054 | 0.041096 | 0.142489 |
| BOYALT LIVER CANCER SUBCLASS G1 UP                     | 106 | 0.399934 | 1.525078 | 0.046122 | 0.143868 |
| KEGG CHRONIC MYELOID LEUKEMIA                          | 73  | 0.387383 | 1.52252  | 0.042065 | 0.145828 |
| WANG TUMOR INVASIVENESS DN                             | 200 | 0.341181 | 1.51853  | 0.032882 | 0.148878 |
| BURTON ADIPOGENESIS 2                                  | 72  | 0.39755  | 1.515559 | 0.039216 | 0.151301 |
| KEGG PANCREATIC CANCER                                 | 69  | 0.388184 | 1.514839 | 0.034749 | 0.151679 |
| RAO BOUND BY SALL4 ISOFORM B                           | 480 | 0.317776 | 1.514425 | 0.010504 | 0.151873 |

|                                                    |     |          |          |          |          |
|----------------------------------------------------|-----|----------|----------|----------|----------|
| PID NOTCH PATHWAY                                  | 58  | 0.396508 | 1.512504 | 0.042885 | 0.15274  |
| JACKSON DNMT1 TARGETS UP                           | 74  | 0.395422 | 1.512036 | 0.035363 | 0.152911 |
| CARD MIR302A TARGETS                               | 77  | 0.402312 | 1.510654 | 0.045635 | 0.153927 |
| JAZAERI BREAST CANCER BRCA1 VS BRCA2 UP            | 47  | 0.434109 | 1.50923  | 0.045726 | 0.154593 |
| APRELIKOVA BRCA1 TARGETS                           | 48  | 0.424253 | 1.505852 | 0.039666 | 0.156934 |
| PID CDC42 PATHWAY                                  | 69  | 0.401321 | 1.505354 | 0.045545 | 0.157137 |
| AMUNDSON POOR SURVIVAL AFTER GAMMA RADIATION 2G    | 161 | 0.334007 | 1.504761 | 0.035052 | 0.157336 |
| SANSOM WNT PATHWAY REQUIRE MYC                     | 57  | 0.401949 | 1.503344 | 0.046559 | 0.157967 |
| MATZUK MALE REPRODUCTION SERTOLI                   | 28  | 0.434846 | 1.502245 | 0.03876  | 0.158691 |
| YAO TEMPORAL RESPONSE TO PROGESTERONE CLUSTER 15   | 31  | 0.433252 | 1.497727 | 0.047817 | 0.162092 |
| FLECHNER PBL KIDNEY TRANSPLANT REJECTED VS OK DN   | 50  | 0.404961 | 1.497522 | 0.027451 | 0.162076 |
| KOYAMA SEMA3B TARGETS DN                           | 370 | 0.304585 | 1.493319 | 0.014028 | 0.165129 |
| BROWNE HCMV INFECTION 8HR DN                       | 44  | 0.412397 | 1.489224 | 0.04845  | 0.167397 |
| SHETH LIVER CANCER VS TXNIP LOSS PAM1              | 221 | 0.323902 | 1.486541 | 0.018293 | 0.169201 |
| BROWNE HCMV INFECTION 30MIN DN                     | 136 | 0.328255 | 1.484028 | 0.012097 | 0.171305 |
| BAKKER FOXO3 TARGETS DN                            | 168 | 0.323115 | 1.482407 | 0.020161 | 0.172384 |
| CREIGHTON ENDOCRINE THERAPY RESISTANCE 4           | 278 | 0.307611 | 1.481572 | 0.010142 | 0.17294  |
| SHIPP DLBCL CURED VS FATAL DN                      | 42  | 0.385979 | 1.481241 | 0.044146 | 0.173025 |
| KEGG PURINE METABOLISM                             | 152 | 0.342204 | 1.479581 | 0.049383 | 0.174054 |
| MULLIGHAN NPM1 SIGNATURE 3 UP                      | 311 | 0.302873 | 1.479113 | 0.023715 | 0.174293 |
| REACTOME SIGNALING BY NOTCH                        | 95  | 0.343089 | 1.475223 | 0.020325 | 0.177146 |
| GRYDER PAX3FOXO1 ENHANCERS KO DOWN                 | 426 | 0.324932 | 1.471148 | 0.046    | 0.180045 |
| PASINI SUZ12 TARGETS UP                            | 102 | 0.33258  | 1.47112  | 0.027505 | 0.179851 |
| BROWNE HCMV INFECTION 12HR UP                      | 104 | 0.347793 | 1.467365 | 0.034343 | 0.182405 |
| BROWNE HCMV INFECTION 24HR UP                      | 139 | 0.322127 | 1.457753 | 0.031373 | 0.190306 |
| LINSLEY MIR16 TARGETS                              | 190 | 0.334743 | 1.454722 | 0.049213 | 0.192201 |
| LIN NPAS4 TARGETS UP                               | 146 | 0.325163 | 1.448942 | 0.026423 | 0.196818 |
| DEURIG T CELL PROLYMPHOCYTIC LEUKEMIA UP           | 340 | 0.30133  | 1.447941 | 0.028226 | 0.197356 |
| HOFFMANN SMALL PRE BII TO IMMATURE B LYMPHOCYTE DN | 45  | 0.368485 | 1.445439 | 0.041754 | 0.198977 |
| KEGG PROSTATE CANCER                               | 89  | 0.352522 | 1.444957 | 0.042636 | 0.199044 |
| OKUMURA INFLAMMATORY RESPONSE LPS                  | 171 | 0.315914 | 1.443961 | 0.025845 | 0.199091 |
| WALLACE PROSTATE CANCER RACE DN                    | 74  | 0.347913 | 1.443845 | 0.04321  | 0.198982 |
| ST PHOSPHOINOSITIDE 3 KINASE PATHWAY               | 37  | 0.400296 | 1.442385 | 0.03854  | 0.200005 |
| FORTSCHEGGER PHF8 TARGETS UP                       | 248 | 0.312259 | 1.436562 | 0.046559 | 0.204157 |
| YOSHIMURA MAPK8 TARGETS DN                         | 350 | 0.308065 | 1.432228 | 0.028112 | 0.206833 |
| CADWELL ATG16L1 TARGETS DN                         | 63  | 0.358065 | 1.430796 | 0.045833 | 0.207804 |
| SHEPARD BMYB MORPHOLINO UP                         | 201 | 0.312314 | 1.429427 | 0.018036 | 0.20901  |
| RAO BOUND BY SALL4                                 | 218 | 0.312793 | 1.415285 | 0.043912 | 0.218891 |
| IWANAGA CARCINOGENESIS BY KRAS PTEN UP             | 163 | 0.311604 | 1.413827 | 0.029586 | 0.219995 |
| DARWICHE PAPILOMA RISK LOW UP                      | 149 | 0.333083 | 1.408046 | 0.049808 | 0.223985 |
| BROWNE HCMV INFECTION 1HR DN                       | 208 | 0.28726  | 1.407956 | 0.019531 | 0.223845 |
| BROWNE HCMV INFECTION 8HR UP                       | 100 | 0.322791 | 1.390408 | 0.043299 | 0.235521 |
| FIRESTEIN PROLIFERATION                            | 166 | 0.30195  | 1.388269 | 0.04918  | 0.236965 |
| LEE AGING NEOCORTEX DN                             | 75  | 0.342268 | 1.386387 | 0.043299 | 0.237327 |
| GAUSSMANN MLL AF4 FUSION TARGETS A UP              | 176 | 0.311393 | 1.381745 | 0.047525 | 0.240275 |

ES, enrichment score; NES, normalized enrichment score; FDR, false discovery rate; GSEA, gene set enrichment analysis; KIF, kinesin.

**Table SIV. GSEA results of c5 reference gene set of high *KIF18B* expression group.**

| Name                                                               | Size | ES       | NES      | NOM<br>P-value | FDR<br>q-value |
|--------------------------------------------------------------------|------|----------|----------|----------------|----------------|
| GO MITOTIC NUCLEAR DIVISION                                        | 337  | 0.695214 | 2.533665 | <0.0001        | <0.0001        |
| GO MITOTIC SISTER CHROMATID SEGREGATION                            | 88   | 0.824457 | 2.504    | <0.0001        | <0.0001        |
| GO ORGANELLE FISSION                                               | 449  | 0.65348  | 2.487347 | <0.0001        | <0.0001        |
| GO REGULATION OF MICROTUBULE<br>POLYMERIZATION OR DEPOLYMERIZATION | 164  | 0.630036 | 2.466409 | <0.0001        | <0.0001        |
| GO REGULATION OF MICROTUBULE BASED<br>PROCESS                      | 226  | 0.613028 | 2.45458  | <0.0001        | <0.0001        |
| GO CHROMOSOME SEGREGATION                                          | 247  | 0.733279 | 2.453065 | <0.0001        | <0.0001        |
| GO CELL DIVISION                                                   | 423  | 0.622785 | 2.432042 | <0.0001        | <0.0001        |
| GO CELL CYCLE CHECKPOINT                                           | 179  | 0.639043 | 2.423801 | <0.0001        | <0.0001        |
| GO SPINDLE POLE                                                    | 113  | 0.665984 | 2.41154  | <0.0001        | <0.0001        |
| GO CONDENSED CHROMOSOME                                            | 169  | 0.745587 | 2.399401 | <0.0001        | 7.85E-05       |
| GO SISTER CHROMATID SEGREGATION                                    | 163  | 0.786773 | 2.398867 | <0.0001        | 7.14E-05       |
| GO NUCLEAR CHROMOSOME SEGREGATION                                  | 204  | 0.744149 | 2.390345 | <0.0001        | 6.55E-05       |
| GO DNA RECOMBINATION                                               | 189  | 0.692473 | 2.387913 | <0.0001        | 6.04E-05       |
| GO SPINDLE                                                         | 267  | 0.605558 | 2.381053 | <0.0001        | 5.61E-05       |
| GO DNA REPLICATION                                                 | 192  | 0.719517 | 2.377038 | <0.0001        | 5.24E-05       |
| GO REGULATION OF NUCLEAR DIVISION                                  | 153  | 0.613795 | 2.372078 | <0.0001        | 4.91E-05       |
| GO MITOTIC CELL CYCLE CHECKPOINT                                   | 129  | 0.615084 | 2.365139 | <0.0001        | 4.62E-05       |
| GO DNA INTEGRITY CHECKPOINT                                        | 136  | 0.604388 | 2.364059 | <0.0001        | 4.36E-05       |
| GO CELL CYCLE PHASE TRANSITION                                     | 248  | 0.658892 | 2.362131 | <0.0001        | 4.13E-05       |
| GO MITOTIC SPINDLE                                                 | 50   | 0.708673 | 2.353799 | <0.0001        | 3.93E-05       |
| GO REGULATION OF CHROMOSOME<br>SEGREGATION                         | 77   | 0.732982 | 2.335761 | <0.0001        | 3.74E-05       |
| GO MITOTIC RECOMBINATION                                           | 41   | 0.892067 | 2.330344 | <0.0001        | 7.05E-05       |
| GO REGULATION OF SISTER CHROMATID<br>SEGREGATION                   | 61   | 0.71342  | 2.329753 | <0.0001        | 6.74E-05       |
| GO POSITIVE REGULATION OF CELL CYCLE<br>PHASE TRANSITION           | 66   | 0.652319 | 2.324191 | <0.0001        | 6.46E-05       |
| GO MITOTIC SPINDLE ORGANIZATION                                    | 64   | 0.734191 | 2.323057 | <0.0001        | 6.21E-05       |
| GO NEGATIVE REGULATION OF PROTEIN<br>COMPLEX DISASSEMBLY           | 156  | 0.580054 | 2.318141 | <0.0001        | 5.97E-05       |
| GO NEGATIVE REGULATION OF MITOTIC CELL<br>CYCLE                    | 184  | 0.545554 | 2.317627 | <0.0001        | 5.75E-05       |
| GO DNA DEPENDENT DNA REPLICATION                                   | 90   | 0.776615 | 2.315754 | <0.0001        | 5.54E-05       |
| GO CELL CYCLE G1 S PHASE TRANSITION                                | 108  | 0.731461 | 2.309636 | <0.0001        | 5.35E-05       |
| GO CONDENSED NUCLEAR CHROMOSOME                                    | 74   | 0.72556  | 2.30792  | <0.0001        | 5.17E-05       |
| GO CHROMOSOME CENTROMERIC REGION                                   | 153  | 0.743936 | 2.306779 | <0.0001        | 5.00E-05       |
| GO CHROMOSOMAL REGION                                              | 297  | 0.679537 | 2.300972 | <0.0001        | 4.85E-05       |
| GO DNA BIOSYNTHETIC PROCESS                                        | 108  | 0.652386 | 2.294378 | <0.0001        | 4.70E-05       |
| GO KINETOCHORE                                                     | 103  | 0.75897  | 2.292932 | <0.0001        | 4.56E-05       |
| GO NEGATIVE REGULATION OF CELL CYCLE<br>PROCESS                    | 199  | 0.540729 | 2.292379 | <0.0001        | 4.43E-05       |
| GO DNA REPAIR                                                      | 433  | 0.590051 | 2.282094 | <0.0001        | 7.41E-05       |
| GO MEIOTIC CELL CYCLE                                              | 162  | 0.620952 | 2.28104  | <0.0001        | 7.21E-05       |



|                                                                                  |     |          |          |         |          |
|----------------------------------------------------------------------------------|-----|----------|----------|---------|----------|
| GO CENTROSOME CYCLE                                                              | 44  | 0.725436 | 2.279923 | <0.0001 | 7.02E-05 |
| GO REGULATION OF CELL DIVISION                                                   | 250 | 0.543265 | 2.279514 | <0.0001 | 6.84E-05 |
| GO MEIOTIC CELL CYCLE PROCESS                                                    | 130 | 0.639148 | 2.272672 | <0.0001 | 6.66E-05 |
| GO CELL CYCLE G2 M PHASE TRANSITION                                              | 134 | 0.613278 | 2.266491 | <0.0001 | 6.50E-05 |
| GO PROTEIN SUMOYLATION                                                           | 112 | 0.650545 | 2.258938 | <0.0001 | 6.35E-05 |
| GO SPINDLE MICROTUBULE                                                           | 56  | 0.699954 | 2.251328 | <0.0001 | 6.20E-05 |
| GO CONDENSED CHROMOSOME CENTROMERIC REGION                                       | 83  | 0.802744 | 2.250374 | <0.0001 | 6.06E-05 |
| GO CHROMOSOME LOCALIZATION                                                       | 56  | 0.713117 | 2.248999 | <0.0001 | 5.92E-05 |
| GO SISTER CHROMATID COHESION                                                     | 100 | 0.788677 | 2.242098 | <0.0001 | 9.45E-05 |
| GO MICROTUBULE CYTOSKELETON ORGANIZATION                                         | 314 | 0.549524 | 2.23961  | <0.0001 | 1.45E-04 |
| GO MITOTIC DNA INTEGRITY CHECKPOINT                                              | 93  | 0.576269 | 2.23897  | <0.0001 | 1.42E-04 |
| GO DOUBLE STRAND BREAK REPAIR                                                    | 151 | 0.656316 | 2.237831 | <0.0001 | 1.40E-04 |
| GO TELOMERE MAINTENANCE VIA RECOMBINATION                                        | 32  | 0.883217 | 2.236518 | <0.0001 | 1.81E-04 |
| GO POSITIVE REGULATION OF MITOTIC CELL CYCLE                                     | 118 | 0.588028 | 2.235824 | <0.0001 | 1.78E-04 |
| GO MIDBODY                                                                       | 121 | 0.567507 | 2.222937 | <0.0001 | 2.70E-04 |
| GO POSITIVE REGULATION OF CELL CYCLE PROCESS                                     | 227 | 0.534526 | 2.221087 | <0.0001 | 2.65E-04 |
| GO METAPHASE PLATE CONGRESSION                                                   | 41  | 0.760706 | 2.218585 | <0.0001 | 2.60E-04 |
| GO NEGATIVE REGULATION OF CYTOSKELETON ORGANIZATION                              | 205 | 0.517592 | 2.212474 | <0.0001 | 2.90E-04 |
| GO REGULATION OF TRANSCRIPTION INVOLVED IN G1 S TRANSITION OF MITOTIC CELL CYCLE | 25  | 0.860641 | 2.212003 | <0.0001 | 2.84E-04 |
| GO POSITIVE REGULATION OF MITOTIC NUCLEAR DIVISION                               | 46  | 0.652065 | 2.203988 | <0.0001 | 3.43E-04 |
| GO REGULATION OF MITOTIC CELL CYCLE                                              | 444 | 0.516949 | 2.198882 | <0.0001 | 4.59E-04 |
| GO SPINDLE MIDZONE                                                               | 25  | 0.798669 | 2.198844 | <0.0001 | 4.51E-04 |
| GO REGULATION OF DNA DEPENDENT DNA REPLICATION                                   | 39  | 0.766749 | 2.198039 | <0.0001 | 4.80E-04 |
| GO RECOMBINATIONAL REPAIR                                                        | 70  | 0.696163 | 2.197403 | <0.0001 | 4.72E-04 |
| GO RNA LOCALIZATION                                                              | 173 | 0.594813 | 2.196538 | <0.0001 | 5.06E-04 |
| GO REGULATION OF SIGNAL TRANSDUCTION BY P53 CLASS MEDIATOR                       | 156 | 0.557775 | 2.196347 | <0.0001 | 4.98E-04 |
| GO REGULATION OF PROTEIN COMPLEX DISASSEMBLY                                     | 198 | 0.53506  | 2.193278 | <0.0001 | 5.78E-04 |
| GO MITOTIC SPINDLE ASSEMBLY                                                      | 39  | 0.696308 | 2.192221 | <0.0001 | 5.87E-04 |
| GO REPLICATION FORK                                                              | 62  | 0.753177 | 2.191554 | <0.0001 | 5.95E-04 |
| GO REGULATION OF CENTROSOME CYCLE                                                | 38  | 0.727174 | 2.187337 | <0.0001 | 6.82E-04 |
| GO MICROTUBULE ORGANIZING CENTER ORGANIZATION                                    | 79  | 0.620049 | 2.18608  | <0.0001 | 6.93E-04 |
| GO REGULATION OF DNA REPLICATION                                                 | 152 | 0.567544 | 2.186019 | <0.0001 | 6.83E-04 |
| GO DEOXYRIBONUCLEASE ACTIVITY                                                    | 63  | 0.618961 | 2.183639 | <0.0001 | 7.00E-04 |
| GO RESPONSE TO IONIZING RADIATION                                                | 137 | 0.545946 | 2.183277 | <0.0001 | 7.11E-04 |
| GO NUCLEAR CHROMOSOME                                                            | 488 | 0.569787 | 2.180921 | <0.0001 | 7.21E-04 |
| GO DNA STRAND ELONGATION                                                         | 29  | 0.861615 | 2.175984 | <0.0001 | 7.62E-04 |
| GO DNA SYNTHESIS INVOLVED IN DNA REPAIR                                          | 67  | 0.690984 | 2.173705 | <0.0001 | 8.09E-04 |

|                                                       |     |          |          |         |          |
|-------------------------------------------------------|-----|----------|----------|---------|----------|
| GO NEGATIVE REGULATION OF CELL DIVISION               | 56  | 0.651914 | 2.167547 | <0.0001 | 8.76E-04 |
| GO SPINDLE ASSEMBLY                                   | 67  | 0.632129 | 2.164428 | <0.0001 | 8.99E-04 |
| GO POSITIVE REGULATION OF CELL CYCLE                  | 308 | 0.48716  | 2.161335 | <0.0001 | 9.58E-04 |
| GO REGULATION OF DNA METABOLIC PROCESS                | 318 | 0.506619 | 2.158969 | <0.0001 | 9.64E-04 |
| GO ENDODEOXYRIBONUCLEASE ACTIVITY                     | 48  | 0.636288 | 2.158758 | <0.0001 | 9.62E-04 |
| GO HELICASE ACTIVITY                                  | 148 | 0.632376 | 2.153421 | <0.0001 | 0.001014 |
| GO NEGATIVE REGULATION OF CELL CYCLE                  | 404 | 0.444209 | 2.153408 | <0.0001 | 0.00101  |
| GO NUCLEAR PERIPHERY                                  | 118 | 0.576716 | 2.153239 | <0.0001 | 9.98E-04 |
| GO REGULATION OF CELL CYCLE PHASE TRANSITION          | 308 | 0.519991 | 2.146266 | <0.0001 | 0.001149 |
| GO G2 DNA DAMAGE CHECKPOINT                           | 31  | 0.676847 | 2.144829 | <0.0001 | 0.001145 |
| GO HETEROCHROMATIN                                    | 65  | 0.622782 | 2.144475 | <0.0001 | 0.001132 |
| GO PURINE NTP DEPENDENT HELICASE ACTIVITY             | 95  | 0.639972 | 2.143051 | <0.0001 | 0.001161 |
| GO DNA STRAND ELONGATION INVOLVED IN DNA REPLICATION  | 25  | 0.892482 | 2.139555 | <0.0001 | 0.001264 |
| GO RIBONUCLEOPROTEIN COMPLEX LOCALIZATION             | 112 | 0.624821 | 2.136743 | <0.0001 | 0.001319 |
| GO NUCLEAR ENVELOPE ORGANIZATION                      | 75  | 0.594105 | 2.132639 | <0.0001 | 0.001367 |
| GO MEIOSIS I                                          | 73  | 0.633108 | 2.130637 | <0.0001 | 0.001419 |
| GO MEMBRANE DISASSEMBLY                               | 44  | 0.70757  | 2.130143 | <0.0001 | 0.001421 |
| GO REGULATION OF CELL CYCLE G2 M PHASE TRANSITION     | 57  | 0.602969 | 2.129376 | <0.0001 | 0.001413 |
| GO POSITIVE REGULATION OF DNA METABOLIC PROCESS       | 174 | 0.497878 | 2.129143 | <0.0001 | 0.001406 |
| GO DNA GEOMETRIC CHANGE                               | 77  | 0.668556 | 2.128682 | <0.0001 | 0.001391 |
| GO MULTI ORGANISM LOCALIZATION                        | 65  | 0.644368 | 2.128169 | <0.0001 | 0.001396 |
| GO DNA HELICASE ACTIVITY                              | 50  | 0.754319 | 2.12734  | <0.0001 | 0.001406 |
| GO NEGATIVE REGULATION OF CELL CYCLE PHASE TRANSITION | 137 | 0.526797 | 2.12709  | <0.0001 | 0.001413 |
| GO NEGATIVE REGULATION OF ORGANELLE ORGANIZATION      | 361 | 0.472241 | 2.124627 | <0.0001 | 0.001452 |
| GO ATPASE ACTIVITY                                    | 412 | 0.481783 | 2.119326 | <0.0001 | 0.001585 |
| GO G1 DNA DAMAGE CHECKPOINT                           | 68  | 0.554537 | 2.118361 | <0.0001 | 0.001656 |
| GO PROTEIN DEPOLYMERIZATION                           | 23  | 0.710478 | 2.116016 | <0.0001 | 0.001669 |
| GO DNA DEPENDENT ATPASE ACTIVITY                      | 76  | 0.699925 | 2.112583 | <0.0001 | 0.00179  |
| GO POSITIVE REGULATION OF CHROMOSOME SEGREGATION      | 23  | 0.758324 | 2.111786 | <0.0001 | 0.001787 |
| GO CELL DIVISION SITE                                 | 47  | 0.616768 | 2.111476 | <0.0001 | 0.001769 |
| GO DNA SECONDARY STRUCTURE BINDING                    | 24  | 0.764532 | 2.110131 | <0.0001 | 0.001819 |
| GO DNA REPLICATION INITIATION                         | 29  | 0.881483 | 2.109485 | <0.0001 | 0.001817 |
| GO MICROTUBULE ORGANIZING CENTER PART                 | 133 | 0.549249 | 2.107216 | <0.0001 | 0.001903 |
| GO CYTOKINESIS                                        | 80  | 0.578635 | 2.106981 | <0.0001 | 0.001903 |
| GO CENTROSOME                                         | 457 | 0.475096 | 2.102207 | <0.0001 | 0.001984 |
| GO REGULATION OF CHROMOSOME ORGANIZATION              | 263 | 0.501659 | 2.096891 | <0.0001 | 0.00218  |
| GO FOUR WAY JUNCTION DNA BINDING                      | 15  | 0.881299 | 2.095665 | <0.0001 | 0.002192 |
| GO NUCLEAR EXPORT                                     | 139 | 0.578038 | 2.094703 | <0.0001 | 0.00224  |
| GO PROTEIN LOCALIZATION TO CHROMOSOME                 | 37  | 0.697169 | 2.094514 | <0.0001 | 0.00223  |

|                                                            |     |          |          |          |          |
|------------------------------------------------------------|-----|----------|----------|----------|----------|
| GO DNA CONFORMATION CHANGE                                 | 243 | 0.63699  | 2.09248  | <0.0001  | 0.002281 |
| GO MRNA CIS SPLICING VIA SPLICEOSOME                       | 18  | 0.756928 | 2.091661 | 0.001976 | 0.002277 |
| GO NUCLEAR PORE                                            | 73  | 0.629965 | 2.089824 | <0.0001  | 0.002333 |
| GO NUCLEOBASE CONTAINING COMPOUND TRANSPORT                | 187 | 0.520372 | 2.087582 | <0.0001  | 0.002383 |
| GO HISTONE PHOSPHORYLATION                                 | 24  | 0.708495 | 2.085798 | <0.0001  | 0.002402 |
| GO NEGATIVE REGULATION OF NUCLEAR DIVISION                 | 42  | 0.655814 | 2.084938 | <0.0001  | 0.002403 |
| GO HISTONE METHYLTRANSFERASE COMPLEX                       | 64  | 0.618044 | 2.084155 | <0.0001  | 0.002415 |
| GO CHROMOSOME CONDENSATION                                 | 26  | 0.785578 | 2.082687 | <0.0001  | 0.00243  |
| GO EUCHROMATIN                                             | 30  | 0.655879 | 2.081471 | <0.0001  | 0.002416 |
| GO ATP DEPENDENT DNA HELICASE ACTIVITY                     | 32  | 0.75186  | 2.074272 | <0.0001  | 0.002738 |
| GO NUCLEAR MATRIX                                          | 95  | 0.553035 | 2.073893 | <0.0001  | 0.002725 |
| GO FEMALE MEIOTIC DIVISION                                 | 22  | 0.711161 | 2.071821 | 0.002041 | 0.002769 |
| GO MICROTUBULE POLYMERIZATION OR DEPOLYMERIZATION          | 38  | 0.60511  | 2.071089 | <0.0001  | 0.002777 |
| GO SOMATIC DIVERSIFICATION OF IMMUNE RECEPTORS             | 37  | 0.643358 | 2.068766 | <0.0001  | 0.002814 |
| GO POSITIVE REGULATION OF DNA BIOSYNTHETIC PROCESS         | 57  | 0.579024 | 2.067949 | <0.0001  | 0.002864 |
| GO KINESIN COMPLEX                                         | 53  | 0.641915 | 2.067668 | <0.0001  | 0.002842 |
| GO STRAND DISPLACEMENT                                     | 25  | 0.826647 | 2.067544 | <0.0001  | 0.002832 |
| GO SIGNAL TRANSDUCTION IN RESPONSE TO DNA DAMAGE           | 91  | 0.537019 | 2.066748 | <0.0001  | 0.002846 |
| GO CENTRIOLE ASSEMBLY                                      | 18  | 0.786683 | 2.066114 | <0.0001  | 0.002838 |
| GO NUCLEUS ORGANIZATION                                    | 124 | 0.517449 | 2.064895 | <0.0001  | 0.002885 |
| GO NUCLEAR REPLICATION FORK                                | 39  | 0.705708 | 2.06335  | <0.0001  | 0.002919 |
| GO REGULATION OF CELLULAR RESPONSE TO HEAT                 | 72  | 0.608696 | 2.063044 | <0.0001  | 0.002898 |
| GO SINGLE STRANDED DNA BINDING                             | 78  | 0.621227 | 2.062861 | <0.0001  | 0.002884 |
| GO REGULATION OF CYTOKINESIS                               | 56  | 0.587097 | 2.06231  | <0.0001  | 0.002863 |
| GO POSITIVE REGULATION OF NUCLEAR DIVISION                 | 57  | 0.581425 | 2.062231 | <0.0001  | 0.002842 |
| GO PEPTIDYL LYSINE MODIFICATION                            | 278 | 0.503187 | 2.057316 | <0.0001  | 0.003018 |
| GO RAN GTPASE BINDING                                      | 31  | 0.710154 | 2.047662 | <0.0001  | 0.003542 |
| GO POSITIVE REGULATION OF CELL CYCLE G2 M PHASE TRANSITION | 18  | 0.686553 | 2.046552 | <0.0001  | 0.003571 |
| GO NUCLEAR HETEROCHROMATIN                                 | 31  | 0.678994 | 2.045704 | <0.0001  | 0.003597 |
| GO REGULATION OF DNA REPAIR                                | 68  | 0.57582  | 2.043149 | <0.0001  | 0.003704 |
| GO MICROTUBULE BASED PROCESS                               | 478 | 0.472544 | 2.04242  | <0.0001  | 0.00371  |
| GO STRUCTURE SPECIFIC DNA BINDING                          | 114 | 0.544633 | 2.040823 | <0.0001  | 0.003742 |
| GO RECIPROCAL DNA RECOMBINATION                            | 34  | 0.666303 | 2.039668 | 0.001916 | 0.003813 |
| GO HISTONE KINASE ACTIVITY                                 | 18  | 0.789801 | 2.038862 | <0.0001  | 0.003814 |
| GO REGULATION OF CELL CYCLE G1 S PHASE TRANSITION          | 140 | 0.471591 | 2.038328 | <0.0001  | 0.003823 |
| GO DNA REPLICATION INDEPENDENT NUCLEOSOME ORGANIZATION     | 47  | 0.751357 | 2.038056 | <0.0001  | 0.003806 |
| GO GAMMA TUBULIN COMPLEX                                   | 19  | 0.68484  | 2.037439 | <0.0001  | 0.003822 |
| GO INTERSTRAND CROSS LINK REPAIR                           | 38  | 0.663361 | 2.035212 | <0.0001  | 0.003915 |

|                                                                         |     |          |          |          |          |
|-------------------------------------------------------------------------|-----|----------|----------|----------|----------|
| GO NEGATIVE REGULATION OF CHROMOSOME ORGANIZATION                       | 93  | 0.577197 | 2.033347 | <0.0001  | 0.003961 |
| GO METHYLTRANSFERASE COMPLEX                                            | 83  | 0.603993 | 2.028147 | <0.0001  | 0.004307 |
| GO CENTROSOME DUPLICATION                                               | 31  | 0.68743  | 2.027841 | <0.0001  | 0.004302 |
| GO HEAT SHOCK PROTEIN BINDING                                           | 86  | 0.518859 | 2.023387 | <0.0001  | 0.004636 |
| GO BASE EXCISION REPAIR                                                 | 39  | 0.632842 | 2.022947 | <0.0001  | 0.004638 |
| GO MICROTUBULE                                                          | 382 | 0.449923 | 2.021772 | <0.0001  | 0.004703 |
| GO CENTRIOLE                                                            | 91  | 0.560001 | 2.020459 | <0.0001  | 0.004781 |
| GO CENTROMERE COMPLEX ASSEMBLY                                          | 42  | 0.801922 | 2.016399 | <0.0001  | 0.005102 |
| GO MICROTUBULE END                                                      | 21  | 0.710149 | 2.012335 | <0.0001  | 0.005349 |
| GO REGULATION OF DNA BIOSYNTHETIC PROCESS                               | 90  | 0.510264 | 2.010707 | <0.0001  | 0.00546  |
| GO MICROTUBULE BINDING                                                  | 189 | 0.478265 | 2.010579 | <0.0001  | 0.005433 |
| GO POSITIVE REGULATION OF CELL CYCLE ARREST                             | 79  | 0.507431 | 2.008409 | 0.001988 | 0.005541 |
| GO REGULATION OF UBIQUITIN PROTEIN LIGASE ACTIVITY                      | 17  | 0.70127  | 2.006411 | 0.004065 | 0.005654 |
| GO NEGATIVE REGULATION OF MITOTIC NUCLEAR DIVISION                      | 32  | 0.680643 | 2.005052 | <0.0001  | 0.005713 |
| GO MEIOTIC CHROMOSOME SEGREGATION                                       | 49  | 0.622079 | 2.00423  | 0.00207  | 0.005758 |
| GO SOMATIC DIVERSIFICATION OF IMMUNOGLOBULINS                           | 26  | 0.653444 | 2.004062 | <0.0001  | 0.005732 |
| GO DNA PACKAGING                                                        | 168 | 0.650433 | 2.001988 | <0.0001  | 0.005845 |
| GO NEGATIVE REGULATION OF CHROMOSOME SEGREGATION                        | 25  | 0.737592 | 2.001595 | <0.0001  | 0.005838 |
| GO NUCLEOTIDE EXCISION REPAIR DNA GAP FILLING                           | 24  | 0.733661 | 1.999863 | <0.0001  | 0.005906 |
| GO REGULATION OF CELL CYCLE ARREST                                      | 100 | 0.488065 | 1.999712 | <0.0001  | 0.005887 |
| GO RNA SPLICING VIA TRANSESTERIFICATION REACTIONS                       | 259 | 0.55264  | 1.999272 | <0.0001  | 0.005869 |
| GO REGULATION OF TELOMERE MAINTENANCE VIA TELOMERE LENGTHENING          | 49  | 0.601568 | 1.998778 | <0.0001  | 0.005883 |
| GO CAJAL BODY                                                           | 49  | 0.602197 | 1.993868 | <0.0001  | 0.00623  |
| GO DNA DIRECTED DNA POLYMERASE ACTIVITY                                 | 26  | 0.650977 | 1.9928   | <0.0001  | 0.006292 |
| GO NUCLEAR UBIQUITIN LIGASE COMPLEX                                     | 39  | 0.621619 | 1.99272  | <0.0001  | 0.006281 |
| GO POSITIVE REGULATION OF TELOMERE MAINTENANCE                          | 44  | 0.588677 | 1.99174  | 0.00207  | 0.006335 |
| GO REGULATION OF CENTROSOME DUPLICATION                                 | 31  | 0.647044 | 1.987476 | <0.0001  | 0.006635 |
| GO POSITIVE REGULATION OF CELL DIVISION                                 | 117 | 0.497792 | 1.983063 | <0.0001  | 0.007006 |
| GO POSITIVE REGULATION OF TELOMERE MAINTENANCE VIA TELOMERE LENGTHENING | 32  | 0.637505 | 1.982239 | 0.002053 | 0.007019 |
| GO MICROTUBULE ASSOCIATED COMPLEX                                       | 141 | 0.492313 | 1.976872 | <0.0001  | 0.007461 |
| GO POSITIVE REGULATION OF CHROMOSOME ORGANIZATION                       | 141 | 0.478981 | 1.976612 | 0.001953 | 0.007444 |
| GO CHROMATIN                                                            | 407 | 0.504658 | 1.974624 | <0.0001  | 0.007563 |
| GO CHROMOSOME TELOMERIC REGION                                          | 150 | 0.586916 | 1.973622 | <0.0001  | 0.007647 |
| GO SOMATIC CELL DNA RECOMBINATION                                       | 31  | 0.639973 | 1.972911 | <0.0001  | 0.007722 |

|                                                                                                              |     |          |          |          |          |
|--------------------------------------------------------------------------------------------------------------|-----|----------|----------|----------|----------|
| GO REGULATION OF RESPONSE TO DNA DAMAGE STIMULUS                                                             | 134 | 0.479004 | 1.97029  | <0.0001  | 0.007913 |
| GO SEX CHROMOSOME                                                                                            | 27  | 0.692076 | 1.969114 | 0.002033 | 0.007953 |
| GO NEGATIVE REGULATION OF CELL CYCLE G1 S PHASE TRANSITION                                                   | 92  | 0.472068 | 1.965732 | <0.0001  | 0.008167 |
| GO CHROMATIN REMODELING                                                                                      | 139 | 0.551518 | 1.963479 | <0.0001  | 0.00831  |
| GO TRNA TRANSPORT                                                                                            | 32  | 0.726221 | 1.961654 | <0.0001  | 0.008424 |
| GO PROTEIN LOCALIZATION TO CYTOSKELETON                                                                      | 28  | 0.613842 | 1.960205 | <0.0001  | 0.008483 |
| GO DNA POLYMERASE ACTIVITY                                                                                   | 33  | 0.601722 | 1.95998  | 0.001992 | 0.008451 |
| GO ATP DEPENDENT CHROMATIN REMODELING                                                                        | 67  | 0.682513 | 1.959655 | <0.0001  | 0.00844  |
| GO CYTOSKELETON DEPENDENT CYTOKINESIS                                                                        | 38  | 0.629121 | 1.95923  | <0.0001  | 0.008453 |
| GO POSITIVE REGULATION OF CYTOKINESIS                                                                        | 28  | 0.632393 | 1.958116 | <0.0001  | 0.008529 |
| GO HISTONE EXCHANGE                                                                                          | 46  | 0.751313 | 1.958035 | <0.0001  | 0.008514 |
| GO ANAPHASE PROMOTING COMPLEX                                                                                | 20  | 0.718019 | 1.956704 | <0.0001  | 0.008636 |
| GO MLL1 2 COMPLEX                                                                                            | 26  | 0.672906 | 1.955337 | <0.0001  | 0.008785 |
| GO DNA DEPENDENT DNA REPLICATION MAINTENANCE OF FIDELITY                                                     | 19  | 0.74737  | 1.955322 | 0.002004 | 0.008745 |
| GO POSITIVE REGULATION OF DNA REPLICATION                                                                    | 84  | 0.50823  | 1.95523  | <0.0001  | 0.008707 |
| GO CYTOPLASMIC MICROTUBULE                                                                                   | 51  | 0.513117 | 1.953852 | <0.0001  | 0.008795 |
| GO ATPASE ACTIVITY COUPLED                                                                                   | 307 | 0.440032 | 1.953424 | <0.0001  | 0.008788 |
| GO RNA SPLICING                                                                                              | 347 | 0.515388 | 1.951778 | <0.0001  | 0.008943 |
| GO TUBULIN BINDING                                                                                           | 255 | 0.444353 | 1.950899 | <0.0001  | 0.008987 |
| GO CHROMOSOME SEPARATION                                                                                     | 16  | 0.763343 | 1.95014  | <0.0001  | 0.009032 |
| GO EXONUCLEASE ACTIVITY                                                                                      | 70  | 0.531533 | 1.947153 | <0.0001  | 0.009343 |
| GO SPLICEOSOMAL COMPLEX                                                                                      | 162 | 0.550271 | 1.947023 | 0.001976 | 0.009303 |
| GO NEGATIVE REGULATION OF DNA REPLICATION                                                                    | 50  | 0.563802 | 1.945711 | <0.0001  | 0.009319 |
| GO REGULATION OF MRNA SPLICING VIA SPLICEOSOME                                                               | 60  | 0.577026 | 1.945565 | <0.0001  | 0.009287 |
| GO MITOTIC CYTOKINESIS                                                                                       | 31  | 0.647185 | 1.944002 | 0.001934 | 0.009416 |
| GO MRNA PROCESSING                                                                                           | 405 | 0.495268 | 1.943403 | <0.0001  | 0.00943  |
| GO PRONUCLEUS                                                                                                | 15  | 0.850921 | 1.943232 | <0.0001  | 0.009398 |
| GO REGULATION OF TELOMERASE ACTIVITY                                                                         | 41  | 0.544635 | 1.942316 | 0.001946 | 0.009473 |
| GO BLASTOCYST GROWTH                                                                                         | 15  | 0.746431 | 1.942142 | 0.002016 | 0.009445 |
| GO ENDONUCLEASE ACTIVITY ACTIVE WITH EITHER RIBO OR DEOXYRIBONUCLEIC ACIDS AND PRODUCING 5 PHOSPHOMONOESTERS | 34  | 0.648212 | 1.94201  | <0.0001  | 0.009417 |
| GO MRNA 3 END PROCESSING                                                                                     | 71  | 0.593629 | 1.941784 | <0.0001  | 0.009402 |
| GO REGULATION OF CHROMATIN SILENCING                                                                         | 21  | 0.691355 | 1.940697 | <0.0001  | 0.009483 |
| GO REGULATION OF TELOMERE MAINTENANCE                                                                        | 64  | 0.554244 | 1.937471 | 0.002092 | 0.0098   |
| GO TELOMERE ORGANIZATION                                                                                     | 101 | 0.621529 | 1.935654 | <0.0001  | 0.009958 |
| GO RNA HELICASE ACTIVITY                                                                                     | 67  | 0.578993 | 1.935323 | <0.0001  | 0.009964 |
| GO TERMINATION OF RNA POLYMERASE II TRANSCRIPTION                                                            | 61  | 0.604972 | 1.930117 | 0.001984 | 0.010582 |
| GO EXONUCLEASE ACTIVITY ACTIVE WITH EITHER RIBO OR DEOXYRIBONUCLEIC ACIDS AND PRODUCING 5 PHOSPHOMONOESTERS  | 40  | 0.580679 | 1.927201 | <0.0001  | 0.01085  |
| GO ATP DEPENDENT MICROTUBULE MOTOR                                                                           | 18  | 0.753385 | 1.927108 | 0.002    | 0.01081  |

| ACTIVITY                                                                               |     |          |          |          |          |
|----------------------------------------------------------------------------------------|-----|----------|----------|----------|----------|
| GO REGULATION OF MRNA METABOLIC PROCESS                                                | 113 | 0.514245 | 1.925224 | <0.0001  | 0.011049 |
| GO SPINDLE LOCALIZATION                                                                | 36  | 0.626319 | 1.923467 | 0.003891 | 0.011236 |
| GO CHROMOSOME ORGANIZATION INVOLVED IN MEIOTIC CELL CYCLE                              | 40  | 0.59764  | 1.918758 | 0.002028 | 0.011895 |
| GO REGULATION OF CYCLIN DEPENDENT PROTEIN KINASE ACTIVITY                              | 93  | 0.458955 | 1.917206 | <0.0001  | 0.012102 |
| GO SPINDLE CHECKPOINT                                                                  | 23  | 0.744945 | 1.916597 | <0.0001  | 0.012131 |
| GO HSP70 PROTEIN BINDING                                                               | 28  | 0.577432 | 1.916277 | <0.0001  | 0.012115 |
| GO CHROMATIN BINDING                                                                   | 408 | 0.457331 | 1.913063 | 0.001988 | 0.012468 |
| GO RESPONSE TO GAMMA RADIATION                                                         | 49  | 0.521189 | 1.913042 | <0.0001  | 0.012417 |
| GO REGULATION OF DOUBLE STRAND BREAK REPAIR                                            | 33  | 0.614142 | 1.910851 | 0.002045 | 0.012712 |
| GO POSTREPLICATION REPAIR                                                              | 48  | 0.593163 | 1.910466 | 0.002008 | 0.012734 |
| GO PROTEIN DNA COMPLEX SUBUNIT ORGANIZATION                                            | 208 | 0.565468 | 1.909632 | <0.0001  | 0.012812 |
| GO REGULATION OF CELL CYCLE CHECKPOINT                                                 | 27  | 0.640725 | 1.909536 | <0.0001  | 0.012764 |
| GO MICROTUBULE PLUS END                                                                | 16  | 0.733785 | 1.909207 | 0.003854 | 0.012746 |
| GO NEGATIVE REGULATION OF CHROMATIN MODIFICATION                                       | 44  | 0.559616 | 1.907574 | 0.003992 | 0.012953 |
| GO REPLISOME                                                                           | 29  | 0.679307 | 1.904793 | 0.00396  | 0.01335  |
| GO SYNAPTONEMAL COMPLEX                                                                | 31  | 0.618171 | 1.904786 | 0.002041 | 0.013294 |
| GO SITE OF DOUBLE STRAND BREAK                                                         | 28  | 0.621918 | 1.904251 | <0.0001  | 0.01331  |
| GO RNA 3 END PROCESSING                                                                | 96  | 0.568402 | 1.902459 | <0.0001  | 0.013534 |
| GO CHROMATIN ASSEMBLY OR DISASSEMBLY                                                   | 155 | 0.610262 | 1.900685 | <0.0001  | 0.013791 |
| GO NUCLEOSOME BINDING                                                                  | 44  | 0.601008 | 1.90063  | 0.003945 | 0.013738 |
| GO NUCLEOBASE BIOSYNTHETIC PROCESS                                                     | 17  | 0.725841 | 1.89965  | 0.001938 | 0.013867 |
| GO NEGATIVE REGULATION OF PROTEIN MODIFICATION BY SMALL PROTEIN CONJUGATION OR REMOVAL | 134 | 0.548366 | 1.898058 | 0.002123 | 0.014065 |
| GO NUCLEASE ACTIVITY                                                                   | 185 | 0.453742 | 1.896295 | 0.001961 | 0.014332 |
| GO MRNA CLEAVAGE FACTOR COMPLEX                                                        | 17  | 0.722851 | 1.895265 | <0.0001  | 0.014472 |
| GO REGULATION OF TELOMERASE RNA LOCALIZATION TO CAJAL BODY                             | 15  | 0.828849 | 1.894692 | <0.0001  | 0.014499 |
| GO NUCLEAR CHROMOSOME TELOMERIC REGION                                                 | 122 | 0.583828 | 1.893977 | 0.003953 | 0.014535 |
| GO INTERCELLULAR BRIDGE                                                                | 40  | 0.539819 | 1.89222  | <0.0001  | 0.014754 |
| GO HOMOLOGOUS CHROMOSOME SEGREGATION                                                   | 37  | 0.597179 | 1.887803 | 0.006173 | 0.015401 |
| GO REGULATION OF DNA RECOMBINATION                                                     | 53  | 0.529242 | 1.884841 | 0.001934 | 0.015843 |
| GO NUCLEIC ACID PHOSPHODIESTER BOND HYDROLYSIS                                         | 230 | 0.464022 | 1.880139 | <0.0001  | 0.016614 |
| GO ESTABLISHMENT OF MITOTIC SPINDLE LOCALIZATION                                       | 23  | 0.659775 | 1.877274 | 0.003937 | 0.017077 |
| GO PCG PROTEIN COMPLEX                                                                 | 43  | 0.562044 | 1.877104 | 0.003984 | 0.017046 |
| GO MICROTUBULE MOTOR ACTIVITY                                                          | 75  | 0.549739 | 1.876132 | 0.00198  | 0.017193 |
| GO NUCLEAR TRANSPORT                                                                   | 341 | 0.417966 | 1.86901  | <0.0001  | 0.018761 |
| GO NUCLEAR CHROMATIN                                                                   | 275 | 0.478557 | 1.868697 | 0.002045 | 0.018771 |

|                                                                          |     |          |          |          |          |
|--------------------------------------------------------------------------|-----|----------|----------|----------|----------|
| GO REGULATION OF DOUBLE STRAND BREAK REPAIR VIA HOMOLOGOUS RECOMBINATION | 17  | 0.700887 | 1.866341 | 0.00404  | 0.019254 |
| GO REGULATION OF DNA METHYLATION                                         | 15  | 0.706243 | 1.865896 | 0.003861 | 0.019278 |
| GO CELL DIFFERENTIATION INVOLVED IN EMBRYONIC PLACENTA DEVELOPMENT       | 25  | 0.602164 | 1.862792 | 0.003802 | 0.019925 |
| GO POSITIVE REGULATION OF RESPONSE TO DNA DAMAGE STIMULUS                | 58  | 0.485864 | 1.86093  | 0.004237 | 0.020303 |
| GO REGULATION OF MITOPHAGY                                               | 40  | 0.507571 | 1.860367 | 0.006135 | 0.020349 |
| GO CELLULAR RESPONSE TO IONIZING RADIATION                               | 50  | 0.514886 | 1.859509 | <0.0001  | 0.020459 |
| GO NEGATIVE REGULATION OF DNA DEPENDENT DNA REPLICATION                  | 15  | 0.735466 | 1.858615 | 0.001976 | 0.020605 |
| GO CHROMATIN MODIFICATION                                                | 490 | 0.442852 | 1.857248 | 0.006    | 0.020875 |
| GO TETRAHYDROFOLATE METABOLIC PROCESS                                    | 19  | 0.666423 | 1.856837 | 0.002053 | 0.020891 |
| GO DNA DAMAGE RESPONSE DETECTION OF DNA DAMAGE                           | 36  | 0.650046 | 1.85424  | 0.004024 | 0.021418 |
| GO NUCLEAR TRANSCRIPTION FACTOR COMPLEX                                  | 125 | 0.449126 | 1.852158 | <0.0001  | 0.021842 |
| GO INO80 TYPE COMPLEX                                                    | 21  | 0.632164 | 1.850495 | 0.003922 | 0.022152 |
| GO XY BODY                                                               | 15  | 0.691813 | 1.847089 | 0.002049 | 0.023058 |
| GO DNA TEMPLATED TRANSCRIPTION TERMINATION                               | 97  | 0.557233 | 1.844482 | 0.006036 | 0.023614 |
| GO BLASTOCYST DEVELOPMENT                                                | 58  | 0.525007 | 1.843357 | 0.002028 | 0.023869 |
| GO NUCLEOTIDYLTRANSFERASE ACTIVITY                                       | 123 | 0.463679 | 1.843153 | 0.001988 | 0.023854 |
| GO SIGNAL TRANSDUCTION BY P53 CLASS MEDIATOR                             | 120 | 0.42971  | 1.841111 | <0.0001  | 0.024265 |
| GO MISMATCH REPAIR                                                       | 26  | 0.643013 | 1.837668 | 0.003922 | 0.025029 |
| GO NUCLEAR ENVELOPE                                                      | 381 | 0.390322 | 1.837366 | 0.001908 | 0.025031 |
| GO ENDONUCLEASE ACTIVITY                                                 | 115 | 0.459825 | 1.834794 | 0.001996 | 0.025611 |
| GO DOUBLE STRANDED RNA BINDING                                           | 59  | 0.527021 | 1.831624 | 0.006024 | 0.026383 |
| GO ANAPHASE PROMOTING COMPLEX DEPENDENT CATABOLIC PROCESS                | 75  | 0.677952 | 1.8279   | 0.002058 | 0.027331 |
| GO NUCLEAR BODY                                                          | 334 | 0.419035 | 1.827334 | 0.003922 | 0.027384 |
| GO REGULATION OF CYTOSKELETON ORGANIZATION                               | 470 | 0.387108 | 1.82515  | <0.0001  | 0.027874 |
| GO LIGAND DEPENDENT NUCLEAR RECEPTOR TRANSCRIPTION COACTIVATOR ACTIVITY  | 51  | 0.49242  | 1.824727 | 0.003922 | 0.027915 |
| GO TRANSLESION SYNTHESIS                                                 | 36  | 0.564277 | 1.82425  | 0.003922 | 0.027961 |
| GO GLUCOSE CATABOLIC PROCESS                                             | 27  | 0.622431 | 1.823228 | 0.012766 | 0.028168 |
| GO NUCLEAR IMPORT                                                        | 126 | 0.44884  | 1.822489 | 0.009901 | 0.028294 |
| GO DAMAGED DNA BINDING                                                   | 62  | 0.536131 | 1.820461 | 0.005964 | 0.028775 |
| GO MITOTIC G2 M TRANSITION CHECKPOINT                                    | 17  | 0.648439 | 1.820438 | 0.010163 | 0.028687 |
| GO HISTONE MRNA METABOLIC PROCESS                                        | 28  | 0.621966 | 1.820354 | 0.007984 | 0.028612 |
| GO CATALYTIC STEP 2 SPLICEOSOME                                          | 84  | 0.565815 | 1.819656 | 0.006073 | 0.028663 |
| GO 3 5 EXONUCLEASE ACTIVITY                                              | 44  | 0.517897 | 1.81815  | 0.005837 | 0.029021 |
| GO NEGATIVE REGULATION OF HISTONE METHYLATION                            | 16  | 0.708159 | 1.817382 | 0.007859 | 0.029173 |
| GO UBIQUITIN LIKE PROTEIN CONJUGATING ENZYME ACTIVITY                    | 29  | 0.618951 | 1.816876 | <0.0001  | 0.02923  |

|                                                                                     |     |          |          |          |          |
|-------------------------------------------------------------------------------------|-----|----------|----------|----------|----------|
| GO PROTEIN ACETYLATION                                                              | 112 | 0.453408 | 1.814955 | 0.005964 | 0.029668 |
| GO CELL AGING                                                                       | 66  | 0.453044 | 1.813908 | 0.004115 | 0.029874 |
| GO RESPONSE TO HEAT                                                                 | 85  | 0.448278 | 1.813829 | 0.004219 | 0.029793 |
| GO CELLULAR RESPONSE TO GAMMA RADIATION                                             | 19  | 0.599839 | 1.813789 | 0.003953 | 0.029702 |
| GO COVALENT CHROMATIN MODIFICATION                                                  | 309 | 0.42754  | 1.810516 | 0.005929 | 0.030734 |
| GO NEGATIVE REGULATION OF CELL AGING                                                | 16  | 0.626328 | 1.799643 | 0.007648 | 0.034204 |
| GO SOMATIC RECOMBINATION OF IMMUNOGLOBULIN GENE SEGMENTS                            | 21  | 0.626999 | 1.797247 | 0.012712 | 0.034942 |
| GO PROTEIN PHOSPHATASE 2A BINDING                                                   | 27  | 0.563725 | 1.79607  | 0.009416 | 0.035216 |
| GO PROTEIN UBIQUITINATION INVOLVED IN UBIQUITIN DEPENDENT PROTEIN CATABOLIC PROCESS | 127 | 0.442055 | 1.793316 | 0.008    | 0.036109 |
| GO REGULATION OF PROTEASOMAL UBIQUITIN DEPENDENT PROTEIN CATABOLIC PROCESS          | 141 | 0.429992 | 1.792834 | 0.003984 | 0.036151 |
| GO POSITIVE REGULATION OF TELOMERASE ACTIVITY                                       | 27  | 0.547519 | 1.787689 | 0.010081 | 0.038053 |
| GO REGULATION OF PROTEIN MODIFICATION BY SMALL PROTEIN CONJUGATION OR REMOVAL       | 266 | 0.427133 | 1.785777 | 0.004115 | 0.038672 |
| GO RESPONSE TO X RAY                                                                | 30  | 0.575432 | 1.785515 | 0.006073 | 0.038639 |
| GO REGULATION OF LIGASE ACTIVITY                                                    | 126 | 0.538859 | 1.782006 | 0.004211 | 0.039873 |
| GO NON RECOMBINATIONAL REPAIR                                                       | 65  | 0.564155 | 1.781894 | 0.01217  | 0.039767 |
| GO PROTEIN K11 LINKED UBIQUITINATION                                                | 26  | 0.617413 | 1.780033 | 0.004008 | 0.040382 |
| GO REGULATION OF CELL AGING                                                         | 32  | 0.519255 | 1.779968 | 0.012195 | 0.040272 |
| GO NUCLEAR MEMBRANE                                                                 | 254 | 0.381785 | 1.779763 | 0.001949 | 0.040224 |
| GO NEGATIVE REGULATION OF HISTONE MODIFICATION                                      | 35  | 0.530651 | 1.779571 | 0.015656 | 0.04016  |
| GO REGULATION OF SPINDLE ORGANIZATION                                               | 19  | 0.627794 | 1.777349 | 0.004175 | 0.040962 |
| GO CYCLIN DEPENDENT PROTEIN KINASE HOLOENZYME COMPLEX                               | 30  | 0.529523 | 1.777017 | <0.0001  | 0.040947 |
| GO U2 TYPE SPLICEOSOMAL COMPLEX                                                     | 29  | 0.581785 | 1.77459  | 0.012024 | 0.041711 |
| GO MALE MEIOSIS I                                                                   | 15  | 0.623856 | 1.774553 | 0.010101 | 0.041594 |
| GO NUCLEOSOMAL DNA BINDING                                                          | 29  | 0.621686 | 1.774498 | 0.005906 | 0.041483 |
| GO DNA LIGATION                                                                     | 16  | 0.662429 | 1.771212 | 0.002049 | 0.04263  |
| GO NUCLEAR LOCALIZATION SEQUENCE BINDING                                            | 20  | 0.662614 | 1.769362 | 0.008114 | 0.043353 |
| GO RETROGRADE VESICLE MEDIATED TRANSPORT GOLGI TO ER                                | 75  | 0.49923  | 1.76719  | 0.009709 | 0.044127 |
| GO REGULATION OF RETINOIC ACID RECEPTOR SIGNALING PATHWAY                           | 16  | 0.605541 | 1.766643 | <0.0001  | 0.044231 |
| GO PML BODY                                                                         | 93  | 0.428366 | 1.766308 | 0.004049 | 0.044281 |
| GO KINESIN BINDING                                                                  | 30  | 0.560245 | 1.765165 | 0.008097 | 0.044591 |
| GO REGULATION OF HISTONE H3 K9 METHYLATION                                          | 17  | 0.665372 | 1.764913 | 0.003976 | 0.044574 |
| GO NEGATIVE REGULATION OF CELLULAR PROTEIN CATABOLIC PROCESS                        | 60  | 0.483221 | 1.764034 | <0.0001  | 0.044835 |
| GO ENDORIBONUCLEASE ACTIVITY PRODUCING 5 PHOSPHOMONOESTERS                          | 26  | 0.637989 | 1.762623 | 0.003984 | 0.045242 |



|                                                                                        |     |          |          |          |          |
|----------------------------------------------------------------------------------------|-----|----------|----------|----------|----------|
| GO POSITIVE REGULATION OF NEURON APOPTOTIC PROCESS                                     | 46  | 0.466252 | 1.762235 | 0.001976 | 0.045254 |
| GO POSITIVE REGULATION OF NEURON DEATH                                                 | 66  | 0.441425 | 1.762017 | <0.0001  | 0.045199 |
| GO DNA DOUBLE STRAND BREAK PROCESSING                                                  | 19  | 0.624737 | 1.759188 | 0.011834 | 0.046298 |
| GO DSRNA FRAGMENTATION                                                                 | 18  | 0.649702 | 1.759006 | 0.012346 | 0.046239 |
| GO POLY PYRIMIDINE TRACT BINDING                                                       | 17  | 0.645035 | 1.757854 | 0.002024 | 0.046646 |
| GO RESPONSE TO RADIATION                                                               | 387 | 0.351811 | 1.756062 | <0.0001  | 0.047224 |
| GO GAMMA TUBULIN BINDING                                                               | 23  | 0.508971 | 1.755962 | 0.007874 | 0.047126 |
| GO SAGA TYPE COMPLEX                                                                   | 30  | 0.556508 | 1.752979 | 0.017928 | 0.048234 |
| GO ATP GENERATION FROM ADP                                                             | 35  | 0.550378 | 1.752127 | 0.016529 | 0.048507 |
| GO SPLICEOSOMAL COMPLEX ASSEMBLY                                                       | 52  | 0.548662 | 1.751859 | 0.019531 | 0.048495 |
| GO REGULATION OF GLUCOSE TRANSPORT                                                     | 93  | 0.434143 | 1.751708 | 0.003824 | 0.048433 |
| GO NEGATIVE REGULATION OF CELL CYCLE G2 M PHASE TRANSITION                             | 23  | 0.558485 | 1.751675 | 0.012146 | 0.0483   |
| GO REGULATION OF PROTEIN EXPORT FROM NUCLEUS                                           | 33  | 0.487741 | 1.751663 | 0.004124 | 0.04816  |
| GO VIRAL GENOME REPLICATION                                                            | 19  | 0.542231 | 1.751095 | 0.006024 | 0.048287 |
| GO HISTONE BINDING                                                                     | 164 | 0.487502 | 1.750468 | 0.00998  | 0.048417 |
| GO HISTONE DEACETYLASE BINDING                                                         | 102 | 0.430481 | 1.749458 | 0.004024 | 0.048764 |
| GO PROTEIN EXPORT FROM NUCLEUS                                                         | 29  | 0.52686  | 1.746546 | 0.013487 | 0.049858 |
| GO MOTOR ACTIVITY                                                                      | 128 | 0.438766 | 1.745523 | 0.004    | 0.050223 |
| GO MALE MEIOSIS                                                                        | 34  | 0.540361 | 1.744635 | 0.006186 | 0.050478 |
| GO NEGATIVE REGULATION OF HISTONE ACETYLATION                                          | 15  | 0.577075 | 1.74397  | 0.003824 | 0.050661 |
| GO ACID AMINO ACID LIGASE ACTIVITY                                                     | 19  | 0.56995  | 1.743816 | 0.011858 | 0.050589 |
| GO POSITIVE REGULATION OF PROTEIN MODIFICATION BY SMALL PROTEIN CONJUGATION OR REMOVAL | 185 | 0.453404 | 1.742916 | 0.008351 | 0.050836 |
| GO 90S PRERIBOSOME                                                                     | 23  | 0.661889 | 1.742273 | 0.015686 | 0.050977 |
| GO BINDING OF SPERM TO ZONA PELLUCIDA                                                  | 30  | 0.546771 | 1.740965 | 0.008316 | 0.051402 |
| GO MITOCHONDRIAL RNA METABOLIC PROCESS                                                 | 23  | 0.635786 | 1.74073  | 0.026585 | 0.051365 |
| GO CELLULAR RESPONSE TO HEAT                                                           | 33  | 0.519102 | 1.740493 | 0.010288 | 0.051335 |
| GO REGULATION OF RNA SPLICING                                                          | 92  | 0.465362 | 1.739125 | 0.016    | 0.051838 |
| GO PROTEIN LOCALIZATION TO CENTROSOME                                                  | 15  | 0.621837 | 1.738324 | 0.01165  | 0.05206  |
| GO SNRNA METABOLIC PROCESS                                                             | 74  | 0.502474 | 1.737493 | 0.020534 | 0.052335 |
| GO REGULATION OF TRANSCRIPTION FROM RNA POLYMERASE I PROMOTER                          | 23  | 0.594121 | 1.737345 | 0.00998  | 0.052253 |
| GO NEGATIVE REGULATION OF DNA METABOLIC PROCESS                                        | 104 | 0.444817 | 1.734873 | 0.008016 | 0.053355 |
| GO PROTEASOME BINDING                                                                  | 16  | 0.629629 | 1.73458  | 0.017822 | 0.05336  |
| GO CORE PROMOTER BINDING                                                               | 146 | 0.420888 | 1.734178 | 0.00404  | 0.053403 |
| GO NCRNA TRANSCRIPTION                                                                 | 80  | 0.491256 | 1.732749 | 0.018405 | 0.053912 |
| GO MRNA CLEAVAGE                                                                       | 17  | 0.623046 | 1.730657 | 0.012397 | 0.054744 |
| GO NUCLEOLAR PART                                                                      | 59  | 0.580881 | 1.728135 | 0.032454 | 0.055856 |
| GO HISTONE H4 ACETYLATION                                                              | 42  | 0.498431 | 1.727242 | 0.007952 | 0.056113 |
| GO PROTEASOME ACCESSORY COMPLEX                                                        | 23  | 0.741598 | 1.719856 | 0.004132 | 0.059716 |
| GO MODULATION BY VIRUS OF HOST MORPHOLOGY OR PHYSIOLOGY                                | 36  | 0.495764 | 1.719356 | 0.005882 | 0.059828 |
| GO NUCLEOBASE METABOLIC PROCESS                                                        | 37  | 0.525913 | 1.719299 | 0.017787 | 0.059692 |

|                                                                                                   |     |          |          |          |          |
|---------------------------------------------------------------------------------------------------|-----|----------|----------|----------|----------|
| GO NUCLEOCYTOPLASMIC TRANSPORTER ACTIVITY                                                         | 23  | 0.628483 | 1.716766 | 0.021359 | 0.060953 |
| GO REGULATION OF PROTEIN UBIQUITINATION INVOLVED IN UBIQUITIN DEPENDENT PROTEIN CATABOLIC PROCESS | 101 | 0.536708 | 1.716236 | 0.021053 | 0.06113  |
| GO CELLULAR RESPONSE TO RADIATION                                                                 | 130 | 0.397308 | 1.714092 | 0.002058 | 0.062161 |
| GO CYCLIN DEPENDENT PROTEIN KINASE ACTIVITY                                                       | 34  | 0.486063 | 1.713921 | 0.004098 | 0.062091 |
| GO POSITIVE REGULATION OF TELOMERE CAPPING                                                        | 15  | 0.590285 | 1.71286  | 0.013725 | 0.06253  |
| GO LRR DOMAIN BINDING                                                                             | 16  | 0.595509 | 1.712166 | 0.022177 | 0.062757 |
| GO SIGNAL SEQUENCE BINDING                                                                        | 36  | 0.534595 | 1.711012 | 0.008    | 0.063206 |
| GO NEGATIVE REGULATION OF MRNA SPLICING VIA SPLICEOSOME                                           | 19  | 0.646439 | 1.709862 | 0.011765 | 0.063629 |
| GO POSITIVE REGULATION OF LIGASE ACTIVITY                                                         | 106 | 0.543527 | 1.708865 | 0.023061 | 0.063993 |
| GO RNA SECONDARY STRUCTURE UNWINDING                                                              | 40  | 0.526357 | 1.707131 | 0.01992  | 0.064714 |
| GO RNA POLYMERASE II CARBOXY TERMINAL DOMAIN KINASE ACTIVITY                                      | 16  | 0.646089 | 1.70641  | 0.014463 | 0.0649   |
| GO PERICENTRIOLAR MATERIAL                                                                        | 18  | 0.608053 | 1.70621  | 0.013592 | 0.064837 |
| GO REGULATION OF DNA BINDING                                                                      | 92  | 0.408634 | 1.704836 | <0.0001  | 0.065382 |
| GO REGULATION OF GENE EXPRESSION EPIGENETIC                                                       | 202 | 0.464621 | 1.702896 | 0.010081 | 0.066267 |
| GO POSITIVE REGULATION OF DNA REPAIR                                                              | 33  | 0.523541 | 1.702372 | 0.014315 | 0.06639  |
| GO CHD TYPE COMPLEX                                                                               | 17  | 0.62802  | 1.697399 | 0.026769 | 0.068915 |
| GO TRANSCRIPTION FACTOR COMPLEX                                                                   | 288 | 0.368924 | 1.697225 | 0.006342 | 0.068839 |
| GO CELLULAR RESPONSE TO ESTROGEN STIMULUS                                                         | 38  | 0.476226 | 1.696599 | 0.00404  | 0.069018 |
| GO NEGATIVE REGULATION OF MRNA METABOLIC PROCESS                                                  | 34  | 0.554485 | 1.694569 | 0.018072 | 0.069973 |
| GO ESC E Z COMPLEX                                                                                | 16  | 0.653419 | 1.693952 | 0.003976 | 0.070185 |
| GO GENE SILENCING                                                                                 | 183 | 0.475892 | 1.693475 | 0.013889 | 0.070288 |
| GO SINGLE STRANDED RNA BINDING                                                                    | 63  | 0.453645 | 1.692115 | 0.01004  | 0.070959 |
| GO DNA BINDING BENDING                                                                            | 19  | 0.578908 | 1.691428 | 0.014706 | 0.071225 |
| GO UBIQUITIN LIKE PROTEIN LIGASE BINDING                                                          | 255 | 0.367148 | 1.689241 | 0.001996 | 0.072313 |
| GO POSITIVE REGULATION OF HISTONE METHYLATION                                                     | 29  | 0.538829 | 1.686885 | 0.013972 | 0.07353  |
| GO SMALL NUCLEAR RIBONUCLEOPROTEIN COMPLEX                                                        | 59  | 0.527515 | 1.686872 | 0.039095 | 0.073349 |
| GO REGULATION OF CHROMATIN ORGANIZATION                                                           | 146 | 0.394492 | 1.686553 | 0.011905 | 0.073345 |
| GO SMALL NUCLEOLAR RIBONUCLEOPROTEIN COMPLEX                                                      | 18  | 0.698641 | 1.686346 | 0.014553 | 0.073266 |
| GO PROTEASOME COMPLEX                                                                             | 73  | 0.570885 | 1.683987 | 0.034274 | 0.074499 |
| GO RIBONUCLEOPROTEIN COMPLEX BINDING                                                              | 89  | 0.45535  | 1.683845 | 0.031809 | 0.074397 |
| GO N ACYLTRANSFERASE ACTIVITY                                                                     | 92  | 0.427953 | 1.683592 | 0.012048 | 0.074379 |
| GO NUCLEOTIDE EXCISION REPAIR DNA INCISION                                                        | 39  | 0.531228 | 1.680682 | 0.016194 | 0.075933 |
| GO PROTEIN ACYLATION                                                                              | 142 | 0.394167 | 1.679421 | 0.010101 | 0.07659  |
| GO REGULATION OF RNA STABILITY                                                                    | 135 | 0.452856 | 1.678117 | 0.016632 | 0.077264 |

|                                                                                                                 |     |          |          |          |          |
|-----------------------------------------------------------------------------------------------------------------|-----|----------|----------|----------|----------|
| GO LIGASE ACTIVITY FORMING CARBON NITROGEN BONDS                                                                | 52  | 0.476419 | 1.677874 | 0.025896 | 0.077228 |
| GO PROTEIN C TERMINUS BINDING                                                                                   | 182 | 0.36281  | 1.67757  | 0.001992 | 0.077201 |
| GO GENE SILENCING BY RNA                                                                                        | 128 | 0.48847  | 1.676417 | 0.015686 | 0.077763 |
| GO PROTEIN POLYUBIQUITINATION                                                                                   | 234 | 0.39708  | 1.67604  | 0.020661 | 0.077817 |
| GO REGULATION OF PROTEASOMAL PROTEIN CATABOLIC PROCESS                                                          | 173 | 0.388696 | 1.674597 | 0.008197 | 0.078269 |
| GO RNA POLYMERASE II TRANSCRIPTION FACTOR COMPLEX                                                               | 100 | 0.421008 | 1.674518 | 0.002096 | 0.078125 |
| GO PROTEASOMAL PROTEIN CATABOLIC PROCESS                                                                        | 263 | 0.409115 | 1.67423  | 0.012371 | 0.07808  |
| GO NUCLEAR EUCHROMATIN                                                                                          | 23  | 0.539271 | 1.673783 | 0.016194 | 0.078167 |
| GO SMALL SUBUNIT PROCESSOME                                                                                     | 32  | 0.601021 | 1.673631 | 0.020921 | 0.078085 |
| GO REGULATION OF HISTONE METHYLATION                                                                            | 51  | 0.49906  | 1.673335 | 0.025591 | 0.078079 |
| GO TOR SIGNALING                                                                                                | 16  | 0.57272  | 1.672169 | 0.017341 | 0.078604 |
| GO INTRACELLULAR ESTROGEN RECEPTOR SIGNALING PATHWAY                                                            | 17  | 0.563483 | 1.670995 | 0.023622 | 0.079106 |
| GO RNA POLYMERASE II CORE PROMOTER SEQUENCE SPECIFIC DNA BINDING                                                | 53  | 0.43583  | 1.666751 | 0.010101 | 0.081707 |
| GO DNA REPAIR COMPLEX                                                                                           | 37  | 0.506046 | 1.664791 | 0.028169 | 0.082809 |
| GO APOPTOTIC NUCLEAR CHANGES                                                                                    | 24  | 0.523923 | 1.663991 | 0.019493 | 0.083065 |
| GO IMMUNOGLOBULIN PRODUCTION                                                                                    | 40  | 0.478885 | 1.663936 | 0.020921 | 0.082903 |
| GO AXON CYTOPLASM                                                                                               | 29  | 0.50491  | 1.663033 | 0.015842 | 0.083269 |
| GO POSITIVE REGULATION OF MRNA PROCESSING                                                                       | 30  | 0.522612 | 1.660284 | 0.018595 | 0.084918 |
| GO MRNA SPLICE SITE SELECTION                                                                                   | 26  | 0.568173 | 1.660076 | 0.049808 | 0.084872 |
| GO METHYL CPG BINDING                                                                                           | 15  | 0.590235 | 1.659652 | 0.025692 | 0.084915 |
| GO RESPONSE TO UV                                                                                               | 119 | 0.390948 | 1.658081 | 0.00818  | 0.085673 |
| GO SIN3 TYPE COMPLEX                                                                                            | 16  | 0.621161 | 1.656476 | 0.03876  | 0.086588 |
| GO TRNA METABOLIC PROCESS                                                                                       | 166 | 0.482884 | 1.654583 | 0.043912 | 0.087727 |
| GO OOCYTE MATURATION                                                                                            | 17  | 0.560351 | 1.652414 | 0.021318 | 0.089013 |
| GO N ACETYLTRANSFERASE ACTIVITY                                                                                 | 76  | 0.440102 | 1.651893 | 0.01833  | 0.089132 |
| GO POSITIVE REGULATION OF CELL CYCLE G1 S PHASE TRANSITION                                                      | 28  | 0.501337 | 1.651322 | 0.012526 | 0.08936  |
| GO SWI SNF SUPERFAMILY TYPE COMPLEX                                                                             | 71  | 0.476373 | 1.649547 | 0.026515 | 0.090511 |
| GO POSITIVE REGULATION OF MITOCHONDRIAL OUTER MEMBRANE PERMEABILIZATION INVOLVED IN APOPTOTIC SIGNALING PATHWAY | 36  | 0.500576 | 1.649258 | 0.027368 | 0.090508 |
| GO P53 BINDING                                                                                                  | 66  | 0.420242 | 1.648637 | 0.01354  | 0.090686 |
| GO NUCLEAR INNER MEMBRANE                                                                                       | 45  | 0.438317 | 1.647532 | 0.009862 | 0.091279 |
| GO REGULATION OF CELLULAR SENESCENCE                                                                            | 26  | 0.499545 | 1.645707 | 0.02994  | 0.092223 |
| GO UBIQUITIN LIKE PROTEIN BINDING                                                                               | 113 | 0.403673 | 1.642633 | 0.021739 | 0.094145 |
| GO UNFOLDED PROTEIN BINDING                                                                                     | 89  | 0.487867 | 1.64228  | 0.028017 | 0.094202 |
| GO CHROMATIN DNA BINDING                                                                                        | 76  | 0.448922 | 1.64214  | 0.021318 | 0.094095 |
| GO 4 IRON 4 SULFUR CLUSTER BINDING                                                                              | 40  | 0.490891 | 1.641797 | 0.028169 | 0.094173 |
| GO HEXOSE CATABOLIC PROCESS                                                                                     | 45  | 0.473236 | 1.641481 | 0.023952 | 0.094188 |
| GO PROTEIN KINASE C BINDING                                                                                     | 47  | 0.440678 | 1.641091 | 0.015873 | 0.094256 |
| GO ANATOMICAL STRUCTURE HOMEOSTASIS                                                                             | 263 | 0.345165 | 1.640907 | 0.003992 | 0.094173 |
| GO NUCLEOTIDE EXCISION REPAIR                                                                                   | 111 | 0.455461 | 1.640795 | 0.022449 | 0.094025 |

|                                                                                                          |     |          |          |          |          |
|----------------------------------------------------------------------------------------------------------|-----|----------|----------|----------|----------|
| GO ACETYLTRANSFERASE COMPLEX                                                                             | 84  | 0.452731 | 1.640681 | 0.03055  | 0.093884 |
| GO CELLULAR RESPONSE TO ESTRADIOL STIMULUS                                                               | 28  | 0.501723 | 1.640649 | 0.016194 | 0.093701 |
| GO REGULATION OF GENE SILENCING                                                                          | 50  | 0.537253 | 1.640078 | 0.030801 | 0.093933 |
| GO PROTEIN K63 LINKED UBIQUITINATION                                                                     | 34  | 0.478582 | 1.639388 | 0.026694 | 0.094231 |
| GO NEGATIVE REGULATION OF RNA SPLICING                                                                   | 24  | 0.595878 | 1.638791 | 0.021912 | 0.094418 |
| GO CYCLIN DEPENDENT PROTEIN SERINE THREONINE KINASE REGULATOR ACTIVITY                                   | 27  | 0.518314 | 1.635404 | 0.025751 | 0.096602 |
| GO ESTABLISHMENT OF SPINDLE ORIENTATION                                                                  | 24  | 0.555838 | 1.63523  | 0.013699 | 0.096512 |
| GO PYRUVATE METABOLIC PROCESS                                                                            | 59  | 0.464302 | 1.631605 | 0.02079  | 0.098911 |
| GO SPERM EGG RECOGNITION                                                                                 | 40  | 0.473869 | 1.629339 | 0.010638 | 0.100405 |
| GO TRANSFERASE COMPLEX TRANSFERRING PHOSPHORUS CONTAINING GROUPS                                         | 230 | 0.374601 | 1.628394 | 0.022133 | 0.100874 |
| GO METHYLATED HISTONE BINDING                                                                            | 46  | 0.475691 | 1.627601 | 0.025243 | 0.101255 |
| GO NEGATIVE REGULATION OF RESPONSE TO DNA DAMAGE STIMULUS                                                | 49  | 0.418    | 1.626376 | 0.012448 | 0.101951 |
| GO CELLULAR SENESCENCE                                                                                   | 32  | 0.466332 | 1.626337 | 0.02459  | 0.101743 |
| GO MODULATION BY SYMBIONT OF HOST CELLULAR PROCESS                                                       | 27  | 0.494681 | 1.62456  | 0.023529 | 0.102857 |
| GO TRNA MODIFICATION                                                                                     | 53  | 0.516353 | 1.623186 | 0.048    | 0.103669 |
| GO EXON EXON JUNCTION COMPLEX                                                                            | 20  | 0.556405 | 1.62315  | 0.035849 | 0.103477 |
| GO NADH METABOLIC PROCESS                                                                                | 33  | 0.52091  | 1.623064 | 0.043659 | 0.103305 |
| GO NEGATIVE REGULATION OF TELOMERE MAINTENANCE VIA TELOMERE LENGTHENING                                  | 17  | 0.598399 | 1.62294  | 0.030426 | 0.103171 |
| GO NUCLEAR SPECK                                                                                         | 188 | 0.396927 | 1.62166  | 0.023715 | 0.103989 |
| GO CYTOPLASMIC EXOSOME RNASE COMPLEX                                                                     | 15  | 0.625546 | 1.62165  | 0.035789 | 0.103776 |
| GO PEPTIDYL SERINE MODIFICATION                                                                          | 146 | 0.380568 | 1.621519 | 0.009901 | 0.103634 |
| GO CELLULAR COMPONENT DISASSEMBLY INVOLVED IN EXECUTION PHASE OF APOPTOSIS                               | 41  | 0.452817 | 1.621243 | 0.017787 | 0.103611 |
| GO REGULATION OF HISTONE H3 K4 METHYLATION                                                               | 24  | 0.545077 | 1.620947 | 0.037475 | 0.103596 |
| GO NAD METABOLIC PROCESS                                                                                 | 49  | 0.46621  | 1.61793  | 0.047423 | 0.105169 |
| GO DNA DAMAGE RESPONSE SIGNAL TRANSDUCTION RESULTING IN TRANSCRIPTION                                    | 15  | 0.559931 | 1.615229 | 0.026263 | 0.107021 |
| GO REGULATION OF MITOCHONDRIAL OUTER MEMBRANE PERMEABILIZATION INVOLVED IN APOPTOTIC SIGNALING PATHWAY   | 42  | 0.470382 | 1.61498  | 0.03527  | 0.107026 |
| GO POSITIVE REGULATION OF MRNA METABOLIC PROCESS                                                         | 42  | 0.466938 | 1.614796 | 0.024742 | 0.106946 |
| GO FOLIC ACID CONTAINING COMPOUND METABOLIC PROCESS                                                      | 27  | 0.52306  | 1.614168 | 0.032653 | 0.107211 |
| GO MATURATION OF 5 8S RRNA FROM TRICISTRONIC RRNA TRANSCRIPT SSU RRNA 5 8S RRNA LSU RRNA                 | 19  | 0.63202  | 1.61405  | 0.04908  | 0.107072 |
| GO RNA POLYADENYLATION                                                                                   | 29  | 0.544795 | 1.611653 | 0.02459  | 0.108714 |
| GO MRNA BINDING                                                                                          | 143 | 0.406967 | 1.611327 | 0.029528 | 0.108702 |
| GO OXIDOREDUCTASE ACTIVITY ACTING ON PAIRED DONORS WITH INCORPORATION OR REDUCTION OF MOLECULAR OXYGEN 2 | 38  | 0.462565 | 1.609781 | 0.018109 | 0.109682 |

|                                                                                                        |     |          |          |          |          |
|--------------------------------------------------------------------------------------------------------|-----|----------|----------|----------|----------|
| OXOGLUTARATE AS ONE DONOR AND INCORPORATION OF ONE ATOM EACH OF OXYGEN INTO BOTH DONORS                |     |          |          |          |          |
| GO SYNAPTONEMAL COMPLEX ORGANIZATION                                                                   | 18  | 0.570751 | 1.609353 | 0.027888 | 0.1098   |
| GO REGULATION OF MEMBRANE PERMEABILITY                                                                 | 69  | 0.425854 | 1.609268 | 0.024793 | 0.109636 |
| GO DNA MODIFICATION                                                                                    | 76  | 0.40915  | 1.608402 | 0.01833  | 0.110119 |
| GO HSP90 PROTEIN BINDING                                                                               | 27  | 0.467777 | 1.60792  | 0.018519 | 0.110318 |
| GO PROTEIN REFOLDING                                                                                   | 19  | 0.585005 | 1.607608 | 0.034043 | 0.110326 |
| GO IN UTERO EMBRYONIC DEVELOPMENT                                                                      | 301 | 0.346253 | 1.607321 | 0.004    | 0.110347 |
| GO REGULATION OF PROTEIN INSERTION INTO MITOCHONDRIAL MEMBRANE INVOLVED IN APOPTOTIC SIGNALING PATHWAY | 29  | 0.496517 | 1.606397 | 0.02449  | 0.110821 |
| GO SYNAPSIS                                                                                            | 28  | 0.52518  | 1.606385 | 0.036364 | 0.110599 |
| GO EXECUTION PHASE OF APOPTOSIS                                                                        | 53  | 0.415665 | 1.605737 | 0.013384 | 0.110898 |
| GO ERROR FREE TRANSLATION SYNTHESIS                                                                    | 17  | 0.632181 | 1.604453 | 0.033797 | 0.111786 |
| GO MICROTUBULE BASED MOVEMENT                                                                          | 192 | 0.398073 | 1.599462 | 0.034765 | 0.115714 |
| GO DNA CATABOLIC PROCESS                                                                               | 26  | 0.481089 | 1.598767 | 0.027559 | 0.116071 |
| GO ISOTYPE SWITCHING                                                                                   | 16  | 0.570794 | 1.59787  | 0.033264 | 0.116348 |
| GO PYRIMIDINE NUCLEOSIDE TRIPHOSPHATE BIOSYNTHETIC PROCESS                                             | 17  | 0.587847 | 1.595108 | 0.04661  | 0.118261 |
| GO NEGATIVE REGULATION OF DNA RECOMBINATION                                                            | 15  | 0.558827 | 1.594683 | 0.037475 | 0.118403 |
| GO ORGANELLE LOCALIZATION                                                                              | 393 | 0.330308 | 1.592694 | 0.01518  | 0.119757 |
| GO RNA POLYMERASE II DISTAL ENHANCER SEQUENCE SPECIFIC DNA BINDING                                     | 61  | 0.431502 | 1.592058 | 0.023211 | 0.12008  |
| GO POSTTRANSCRIPTIONAL REGULATION OF GENE EXPRESSION                                                   | 417 | 0.36652  | 1.591161 | 0.028747 | 0.120595 |
| GO REGULATION OF CELLULAR PROTEIN CATABOLIC PROCESS                                                    | 262 | 0.379188 | 1.590152 | 0.029046 | 0.121173 |
| GO CELLULAR PROTEIN COMPLEX LOCALIZATION                                                               | 21  | 0.501586 | 1.590129 | 0.035156 | 0.120941 |
| GO TELOMERE MAINTENANCE VIA TELOMERE LENGTHENING                                                       | 24  | 0.509431 | 1.589813 | 0.03681  | 0.120963 |
| GO PROTEIN LOCALIZATION TO NUCLEUS                                                                     | 151 | 0.364499 | 1.587519 | 0.022774 | 0.12244  |
| GO PORE COMPLEX ASSEMBLY                                                                               | 15  | 0.62296  | 1.58742  | 0.045833 | 0.122263 |
| GO HYDROLASE ACTIVITY ACTING ON CARBON NITROGEN BUT NOT PEPTIDE BONDS IN CYCLIC AMIDINES               | 32  | 0.49158  | 1.586432 | 0.031381 | 0.122847 |
| GO NUCLEAR TRANSCRIPTIONAL REPRESSOR COMPLEX                                                           | 22  | 0.551278 | 1.586268 | 0.038314 | 0.122751 |
| GO PROTEIN IMPORT                                                                                      | 150 | 0.370048 | 1.583494 | 0.020704 | 0.124709 |
| GO RESPONSE TO TESTOSTERONE                                                                            | 37  | 0.425941 | 1.583486 | 0.015905 | 0.124473 |
| GO ENDORIBONUCLEASE COMPLEX                                                                            | 17  | 0.59136  | 1.58022  | 0.033797 | 0.127159 |
| GO NEGATIVE REGULATION OF DNA BINDING                                                                  | 46  | 0.428822 | 1.579294 | 0.030426 | 0.127728 |
| GO RESPONSE TO CAFFEINE                                                                                | 17  | 0.518458 | 1.576671 | 0.020661 | 0.129504 |
| GO RRNA TRANSCRIPTION                                                                                  | 17  | 0.580251 | 1.574638 | 0.044625 | 0.130292 |
| GO NUCLEAR ENVELOPE REASSEMBLY                                                                         | 17  | 0.568899 | 1.574309 | 0.04817  | 0.130318 |
| GO POSITIVE REGULATION OF VIRAL GENOME REPLICATION                                                     | 29  | 0.465615 | 1.574018 | 0.044266 | 0.130066 |

|                                                                 |     |          |          |          |          |
|-----------------------------------------------------------------|-----|----------|----------|----------|----------|
| GO REGULATION OF CELL MATURATION                                | 18  | 0.520363 | 1.573624 | 0.031434 | 0.130155 |
| GO REGULATION OF PROTEIN PHOSPHATASE TYPE 2A ACTIVITY           | 23  | 0.514276 | 1.573291 | 0.038153 | 0.130209 |
| GO POSITIVE REGULATION OF CELLULAR PROTEIN CATABOLIC PROCESS    | 185 | 0.398118 | 1.572266 | 0.046218 | 0.130818 |
| GO MULTICELLULAR ORGANISM AGING                                 | 30  | 0.426614 | 1.571733 | 0.016097 | 0.131081 |
| GO MODIFICATION BY SYMBIONT OF HOST MORPHOLOGY OR PHYSIOLOGY    | 44  | 0.450837 | 1.568534 | 0.021739 | 0.133624 |
| GO POSITIVE REGULATION OF RNA SPLICING                          | 22  | 0.529438 | 1.568522 | 0.046939 | 0.133375 |
| GO ACETYLTRANSFERASE ACTIVITY                                   | 92  | 0.402573 | 1.567502 | 0.024691 | 0.133991 |
| GO GLUCOSE 6 PHOSPHATE METABOLIC PROCESS                        | 21  | 0.563066 | 1.563586 | 0.043137 | 0.137066 |
| GO PROTEIN SERINE THREONINE KINASE ACTIVITY                     | 425 | 0.323065 | 1.561703 | 0.009434 | 0.138224 |
| GO NEGATIVE REGULATION OF PROTEIN ACETYLATION                   | 20  | 0.481625 | 1.561565 | 0.025743 | 0.138106 |
| GO DNA CATABOLIC PROCESS ENDONUCLEOLYTIC                        | 18  | 0.513371 | 1.560898 | 0.038911 | 0.138474 |
| GO CELLULAR COMPONENT DISASSEMBLY                               | 488 | 0.344172 | 1.560675 | 0.03055  | 0.138419 |
| GO HISTONE METHYLTRANSFERASE ACTIVITY                           | 47  | 0.440995 | 1.559927 | 0.038384 | 0.138872 |
| GO ALDITOL METABOLIC PROCESS                                    | 18  | 0.559822 | 1.559636 | 0.03937  | 0.13891  |
| GO RNA STABILIZATION                                            | 29  | 0.500046 | 1.558303 | 0.045545 | 0.139872 |
| GO CRANIAL NERVE MORPHOGENESIS                                  | 23  | 0.536053 | 1.557115 | 0.034137 | 0.140685 |
| GO PRE MRNA BINDING                                             | 24  | 0.526258 | 1.555345 | 0.046693 | 0.142144 |
| GO REGULATION OF MAMMARY GLAND EPITHELIAL CELL PROLIFERATION    | 16  | 0.5383   | 1.55502  | 0.041833 | 0.142175 |
| GO DEVELOPMENTAL PROGRAMMED CELL DEATH                          | 26  | 0.481542 | 1.554506 | 0.037698 | 0.142355 |
| GO MITOCHONDRIAL MEMBRANE ORGANIZATION                          | 90  | 0.416129 | 1.551527 | 0.037344 | 0.144631 |
| GO NEURAL PRECURSOR CELL PROLIFERATION                          | 70  | 0.414361 | 1.551003 | 0.025845 | 0.144819 |
| GO INTRINSIC APOPTOTIC SIGNALING PATHWAY                        | 147 | 0.326404 | 1.548475 | 0.010081 | 0.147032 |
| GO REGULATION OF TRANSCRIPTION FROM RNA POLYMERASE III PROMOTER | 20  | 0.489466 | 1.546822 | 0.045361 | 0.148128 |
| GO NEGATIVE REGULATION OF GENE SILENCING                        | 18  | 0.509661 | 1.546218 | 0.045455 | 0.148435 |
| GO OOCYTE DIFFERENTIATION                                       | 34  | 0.452072 | 1.545829 | 0.022358 | 0.148554 |
| GO CRANIAL NERVE DEVELOPMENT                                    | 42  | 0.450946 | 1.54538  | 0.034816 | 0.148742 |
| GO L ALPHA AMINO ACID TRANSMEMBRANE TRANSPORT                   | 30  | 0.482206 | 1.542854 | 0.049281 | 0.150081 |
| GO PROTEIN IMPORT INTO NUCLEUS TRANSLOCATION                    | 28  | 0.457084 | 1.541084 | 0.043933 | 0.151209 |
| GO ADP BINDING                                                  | 31  | 0.444737 | 1.536849 | 0.034286 | 0.154483 |
| GO ENDORIBONUCLEASE ACTIVITY                                    | 45  | 0.45567  | 1.536706 | 0.049689 | 0.154376 |
| GO POSITIVE REGULATION OF PROTEIN LOCALIZATION TO NUCLEUS       | 126 | 0.344116 | 1.536172 | 0.018405 | 0.154396 |
| GO HORMONE RECEPTOR BINDING                                     | 146 | 0.347855 | 1.529838 | 0.020121 | 0.159147 |
| GO PROTEIN MONOUBIQUITINATION                                   | 49  | 0.453037 | 1.529269 | 0.04277  | 0.159102 |
| GO OXIDOREDUCTASE ACTIVITY ACTING ON                            | 16  | 0.510637 | 1.524861 | 0.046939 | 0.162887 |

|                                                                         |     |          |          |          |          |
|-------------------------------------------------------------------------|-----|----------|----------|----------|----------|
| THE CH NH GROUP OF DONORS NAD OR NADP AS ACCEPTOR                       |     |          |          |          |          |
| GO REGULATION OF TYPE I INTERFERON MEDIATED SIGNALING PATHWAY           | 25  | 0.491582 | 1.523489 | 0.045635 | 0.163927 |
| GO POSITIVE REGULATION OF CELLULAR PROTEIN LOCALIZATION                 | 335 | 0.298118 | 1.522932 | 0.001961 | 0.1642   |
| GO ESTABLISHMENT OF MITOTIC SPINDLE ORIENTATION                         | 19  | 0.525008 | 1.517628 | 0.041016 | 0.169439 |
| GO NEGATIVE REGULATION OF BINDING                                       | 129 | 0.337844 | 1.516241 | 0.014028 | 0.170576 |
| GO REGULATION OF ESTABLISHMENT OF PROTEIN LOCALIZATION TO MITOCHONDRION | 120 | 0.34131  | 1.515087 | 0.022449 | 0.171471 |
| GO POSITIVE REGULATION OF CHROMATIN MODIFICATION                        | 81  | 0.384956 | 1.513425 | 0.04902  | 0.172789 |
| GO PALLIUM DEVELOPMENT                                                  | 148 | 0.360975 | 1.512546 | 0.016    | 0.172868 |
| GO MACROMOLECULE DEACYLATION                                            | 66  | 0.38652  | 1.508687 | 0.036364 | 0.175108 |
| GO CEREBRAL CORTEX DEVELOPMENT                                          | 103 | 0.378168 | 1.507116 | 0.025896 | 0.176162 |
| GO ANATOMICAL STRUCTURE ARRANGEMENT                                     | 17  | 0.534651 | 1.506784 | 0.04277  | 0.176244 |
| GO CELLULAR RESPONSE TO UV                                              | 65  | 0.37759  | 1.506528 | 0.046939 | 0.176244 |
| GO CELLULAR RESPONSE TO HYDROGEN PEROXIDE                               | 60  | 0.378247 | 1.506035 | 0.034836 | 0.176426 |
| GO REGULATION OF PROTEIN CATABOLIC PROCESS                              | 376 | 0.330624 | 1.505527 | 0.030738 | 0.176352 |
| GO NEGATIVE REGULATION OF PROTEIN CATABOLIC PROCESS                     | 103 | 0.349017 | 1.502487 | 0.032922 | 0.178804 |
| GO NITROGEN COMPOUND TRANSPORT                                          | 476 | 0.300897 | 1.500996 | 0.005736 | 0.180131 |
| GO RESPONSE TO GONADOTROPIN                                             | 26  | 0.472858 | 1.500551 | 0.034068 | 0.180316 |
| GO PROTEIN PHOSPHATASE BINDING                                          | 117 | 0.346367 | 1.494817 | 0.015504 | 0.18528  |
| GO INTRINSIC APOPTOTIC SIGNALING PATHWAY IN RESPONSE TO DNA DAMAGE      | 70  | 0.352472 | 1.492845 | 0.031373 | 0.187213 |
| GO ORGAN REGENERATION                                                   | 82  | 0.363604 | 1.492764 | 0.025263 | 0.186695 |
| GO ORGANELLE ASSEMBLY                                                   | 450 | 0.329846 | 1.492388 | 0.032854 | 0.186508 |
| GO NEGATIVE REGULATION OF PROTEIN BINDING                               | 78  | 0.357497 | 1.49208  | 0.030612 | 0.186571 |
| GO POSITIVE REGULATION OF PROTEASOMAL PROTEIN CATABOLIC PROCESS         | 95  | 0.3494   | 1.491917 | 0.038306 | 0.186432 |
| GO POSITIVE REGULATION OF PROTEOLYSIS                                   | 349 | 0.332446 | 1.487456 | 0.041068 | 0.18991  |
| GO MAGNESIUM ION BINDING                                                | 188 | 0.315254 | 1.484554 | 0.014056 | 0.19196  |
| GO OVARIAN FOLLICLE DEVELOPMENT                                         | 55  | 0.370953 | 1.483198 | 0.024845 | 0.19319  |
| GO MALE GAMETE GENERATION                                               | 392 | 0.30732  | 1.482003 | 0.008147 | 0.194205 |
| GO POSITIVE REGULATION OF G1 S TRANSITION OF MITOTIC CELL CYCLE         | 24  | 0.456614 | 1.481508 | 0.045064 | 0.194459 |
| GO REGULATION OF PROTEIN IMPORT INTO NUCLEUS TRANSLOCATION              | 21  | 0.452743 | 1.480863 | 0.04277  | 0.194852 |
| GO SINGLE FERTILIZATION                                                 | 92  | 0.348239 | 1.479414 | 0.024793 | 0.19581  |
| GO REGULATION OF MEIOTIC CELL CYCLE                                     | 38  | 0.418345 | 1.476862 | 0.048096 | 0.19836  |
| GO AGING                                                                | 256 | 0.30723  | 1.4759   | 0.014675 | 0.19926  |
| GO PROTEIN N TERMINUS BINDING                                           | 101 | 0.345558 | 1.473382 | 0.045635 | 0.201295 |
| GO STRUCTURAL CONSTITUENT OF CYTOSKELETON                               | 94  | 0.379992 | 1.470907 | 0.04829  | 0.203131 |

|                                                        |     |          |          |          |          |
|--------------------------------------------------------|-----|----------|----------|----------|----------|
| GO CELLULAR RESPONSE TO LIGHT STIMULUS                 | 86  | 0.347879 | 1.470624 | 0.031646 | 0.203118 |
| GO POSITIVE REGULATION OF MITOCHONDRION ORGANIZATION   | 151 | 0.329367 | 1.46222  | 0.041068 | 0.209599 |
| GO HYDROLASE ACTIVITY HYDROLYZING N GLYCOSYL COMPOUNDS | 22  | 0.479561 | 1.460692 | 0.040568 | 0.211156 |
| GO RESPONSE TO DSRNA                                   | 54  | 0.380661 | 1.459333 | 0.040404 | 0.212181 |
| GO GAMETE GENERATION                                   | 488 | 0.293725 | 1.459058 | 0.004107 | 0.212169 |
| GO TRANSFERASE ACTIVITY TRANSFERRING PENTOSYL GROUPS   | 51  | 0.365533 | 1.457853 | 0.042017 | 0.213306 |
| GO RIBONUCLEOPROTEIN GRANULE                           | 139 | 0.351907 | 1.452017 | 0.047325 | 0.218014 |
| GO CELLULAR RESPONSE TO OXIDATIVE STRESS               | 177 | 0.309304 | 1.44906  | 0.027426 | 0.220634 |
| GO CELLULAR RESPONSE TO ALKALOID                       | 32  | 0.411007 | 1.447818 | 0.049896 | 0.22116  |
| GO METENCEPHALON DEVELOPMENT                           | 99  | 0.382518 | 1.447195 | 0.048356 | 0.221221 |
| GO CELLULAR RESPONSE TO REACTIVE OXYGEN SPECIES        | 102 | 0.333436 | 1.442002 | 0.023061 | 0.226021 |
| GO CELL CYCLE ARREST                                   | 142 | 0.307337 | 1.438642 | 0.020161 | 0.22848  |
| GO REGULATION OF CELLULAR AMIDE METABOLIC PROCESS      | 321 | 0.31972  | 1.437991 | 0.041068 | 0.228961 |
| GO OOGENESIS                                           | 57  | 0.370357 | 1.431047 | 0.039916 | 0.233608 |
| GO FEMALE GAMETE GENERATION                            | 84  | 0.333072 | 1.430269 | 0.031558 | 0.23426  |
| GO CELLULAR RESPONSE TO ALCOHOL                        | 110 | 0.346435 | 1.427815 | 0.025743 | 0.236065 |
| GO RESPONSE TO VITAMIN                                 | 95  | 0.335466 | 1.425134 | 0.04898  | 0.238041 |
| GO RESPONSE TO ESTRADIOL                               | 143 | 0.310524 | 1.421045 | 0.022634 | 0.241204 |
| GO LIMBIC SYSTEM DEVELOPMENT                           | 94  | 0.348151 | 1.419289 | 0.046693 | 0.242089 |
| GO LIGASE ACTIVITY                                     | 375 | 0.308517 | 1.411824 | 0.043121 | 0.24861  |

ES, enrichment score; NES, normalized enrichment score; FDR, false discovery rate; GSEA, gene set enrichment analysis; KIF, kinesin.



**Table SV. GSEA results of c2 reference gene set of high *KIF18B* expression group.**

| Name                                             | Size | ES       | NES      | NOM<br>P-val | FDR<br>q-value |
|--------------------------------------------------|------|----------|----------|--------------|----------------|
| LINDGREN BLADDER CANCER CLUSTER 1 DN             | 356  | 0.608203 | 2.651989 | <0.0001      | <0.0001        |
| SHEPARD BMYB TARGETS                             | 70   | 0.789135 | 2.556192 | <0.0001      | <0.0001        |
| SHEPARD BMYB MORPHOLINO DN                       | 193  | 0.642768 | 2.548583 | <0.0001      | <0.0001        |
| DUTERTRE ESTRADIOL RESPONSE 24HR UP              | 309  | 0.843362 | 2.51653  | <0.0001      | <0.0001        |
| TOYOTA TARGETS OF MIR34B AND MIR34C              | 409  | 0.654658 | 2.505821 | <0.0001      | <0.0001        |
| GAVIN FOXP3 TARGETS CLUSTER P6                   | 88   | 0.819558 | 2.504447 | <0.0001      | <0.0001        |
| WHITFIELD CELL CYCLE G2                          | 169  | 0.690554 | 2.501407 | <0.0001      | <0.0001        |
| ZHENG GLIOBLASTOMA PLASTICITY UP                 | 240  | 0.62588  | 2.494126 | <0.0001      | <0.0001        |
| RUIZ TNC TARGETS DN                              | 136  | 0.795786 | 2.484866 | <0.0001      | <0.0001        |
| KAUFFMANN DNA REPLICATION GENES                  | 141  | 0.689284 | 2.483981 | <0.0001      | <0.0001        |
| BASAKI YBX1 TARGETS UP                           | 268  | 0.754848 | 2.483411 | <0.0001      | <0.0001        |
| BLUM RESPONSE TO SALIRASIB DN                    | 336  | 0.725009 | 2.482629 | <0.0001      | <0.0001        |
| VECCHI GASTRIC CANCER EARLY UP                   | 384  | 0.714576 | 2.482614 | <0.0001      | <0.0001        |
| AFFAR YY1 TARGETS DN                             | 226  | 0.620023 | 2.476123 | <0.0001      | <0.0001        |
| CHEMNITZ RESPONSE TO PROSTAGLANDIN E2<br>UP      | 129  | 0.767644 | 2.475762 | <0.0001      | <0.0001        |
| CROONQUIST NRAS VS STROMAL STIMULATION<br>DN     | 98   | 0.694698 | 2.474264 | <0.0001      | <0.0001        |
| ODONNELL TFRC TARGETS DN                         | 123  | 0.813105 | 2.472898 | <0.0001      | <0.0001        |
| SARRIO EPITHELIAL MESENCHYMAL<br>TRANSITION UP   | 171  | 0.786611 | 2.472442 | <0.0001      | <0.0001        |
| CHIANG LIVER CANCER SUBCLASS<br>PROLIFERATION UP | 164  | 0.804616 | 2.470043 | <0.0001      | <0.0001        |
| WANG RESPONSE TO GSK3 INHIBITOR SB216763<br>DN   | 332  | 0.656208 | 2.464246 | <0.0001      | <0.0001        |
| LIAO METASTASIS                                  | 495  | 0.532635 | 2.437502 | <0.0001      | <0.0001        |
| FLORIO NEOCORTEX BASAL RADIAL GLIA DN            | 187  | 0.84075  | 2.435493 | <0.0001      | <0.0001        |
| FURUKAWA DUSP6 TARGETS PCI35 DN                  | 67   | 0.822387 | 2.433345 | <0.0001      | <0.0001        |
| PUJANA BRCA2 PCC NETWORK                         | 401  | 0.721308 | 2.424555 | <0.0001      | 3.31E-05       |
| LE EGR2 TARGETS UP                               | 104  | 0.803958 | 2.42148  | <0.0001      | 3.18E-05       |
| GRAHAM CML DIVIDING VS NORMAL<br>QUIESCENT UP    | 176  | 0.799011 | 2.421    | <0.0001      | 3.06E-05       |
| ALCALAY AML BY NPM1 LOCALIZATION DN              | 180  | 0.558588 | 2.409388 | <0.0001      | 2.94E-05       |
| KEGG CELL CYCLE                                  | 124  | 0.721007 | 2.408469 | <0.0001      | 2.84E-05       |
| WHITFIELD CELL CYCLE G2 M                        | 196  | 0.653129 | 2.407541 | <0.0001      | 2.74E-05       |
| ZHANG TLX TARGETS 60HR DN                        | 263  | 0.815048 | 2.40398  | <0.0001      | 2.65E-05       |
| LINDGREN BLADDER CANCER CLUSTER 3 UP             | 305  | 0.717653 | 2.400535 | <0.0001      | 2.56E-05       |
| SHEPARD CRUSH AND BURN MUTANT DN                 | 174  | 0.635677 | 2.399899 | <0.0001      | 2.48E-05       |
| RIZ ERYTHROID DIFFERENTIATION                    | 72   | 0.699786 | 2.395906 | <0.0001      | 2.41E-05       |
| HOFFMANN LARGE TO SMALL PRE BII<br>LYMPHOCYTE UP | 158  | 0.790739 | 2.394133 | <0.0001      | 2.34E-05       |
| FUJII YBX1 TARGETS DN                            | 193  | 0.774218 | 2.394083 | <0.0001      | 2.27E-05       |
| FOURNIER ACINAR DEVELOPMENT LATE 2               | 265  | 0.738993 | 2.392198 | <0.0001      | 2.21E-05       |
| MARKEY RB1 ACUTE LOF UP                          | 223  | 0.728226 | 2.386909 | <0.0001      | 4.68E-05       |
| MORI PRE BI LYMPHOCYTE UP                        | 78   | 0.769408 | 2.38381  | <0.0001      | 4.56E-05       |

|                                                |     |          |          |         |          |
|------------------------------------------------|-----|----------|----------|---------|----------|
| FISCHER G2 M CELL CYCLE                        | 220 | 0.763198 | 2.383128 | <0.0001 | 4.44E-05 |
| LI WILMS TUMOR VS FETAL KIDNEY 1 DN            | 159 | 0.79942  | 2.379187 | <0.0001 | 4.33E-05 |
| LEE EARLY T LYMPHOCYTE UP                      | 97  | 0.834666 | 2.378463 | <0.0001 | 4.23E-05 |
| BURTON ADIPOGENESIS PEAK AT 24HR               | 42  | 0.895226 | 2.376109 | <0.0001 | 4.13E-05 |
| KOBAYASHI EGFR SIGNALING 24HR DN               | 242 | 0.85161  | 2.374535 | <0.0001 | 4.03E-05 |
| BURTON ADIPOGENESIS 3                          | 100 | 0.858249 | 2.369379 | <0.0001 | 5.43E-05 |
| CHANG CYCLING GENES                            | 138 | 0.873537 | 2.366816 | <0.0001 | 5.31E-05 |
| FERREIRA EWINGS SARCOMA UNSTABLE VS STABLE UP  | 148 | 0.756718 | 2.363326 | <0.0001 | 5.19E-05 |
| STEIN ESRRRA TARGETS RESPONSIVE TO ESTROGEN DN | 39  | 0.831171 | 2.363122 | <0.0001 | 5.08E-05 |
| DUTERTRE ESTRADIOL RESPONSE 6HR UP             | 218 | 0.588938 | 2.353324 | <0.0001 | 9.94E-05 |
| REACTOME CELL CYCLE MITOTIC                    | 299 | 0.721819 | 2.350134 | <0.0001 | 9.74E-05 |
| SHEDDEN LUNG CANCER POOR SURVIVAL A6           | 427 | 0.798459 | 2.348762 | <0.0001 | 9.54E-05 |
| MORI MATURE B LYMPHOCYTE DN                    | 72  | 0.674875 | 2.345805 | <0.0001 | 9.36E-05 |
| PUJANA BREAST CANCER LIT INT NETWORK           | 97  | 0.708693 | 2.344361 | <0.0001 | 9.18E-05 |
| PID E2F PATHWAY                                | 73  | 0.696553 | 2.343881 | <0.0001 | 9.00E-05 |
| REACTOME CELL CYCLE                            | 386 | 0.69674  | 2.336957 | <0.0001 | 8.84E-05 |
| VILLANUEVA LIVER CANCER KRT19 UP               | 162 | 0.737877 | 2.336815 | <0.0001 | 8.68E-05 |
| NADERI BREAST CANCER PROGNOSIS UP              | 46  | 0.802431 | 2.336593 | <0.0001 | 8.52E-05 |
| CROONQUIST NRAS SIGNALING DN                   | 71  | 0.945903 | 2.330528 | <0.0001 | 9.66E-05 |
| BENPORATH ES CORE NINE CORRELATED              | 98  | 0.643199 | 2.329801 | <0.0001 | 9.49E-05 |
| FISCHER G1 S CELL CYCLE                        | 192 | 0.639166 | 2.324182 | <0.0001 | 1.07E-04 |
| HU GENOTOXIC DAMAGE 4HR                        | 35  | 0.797247 | 2.317543 | <0.0001 | 1.18E-04 |
| CROONQUIST IL6 DEPRIVATION DN                  | 96  | 0.907253 | 2.314846 | <0.0001 | 1.16E-04 |
| MANALO HYPOXIA DN                              | 271 | 0.755888 | 2.313522 | <0.0001 | 1.14E-04 |
| OXFORD RALA OR RALB TARGETS UP                 | 45  | 0.865834 | 2.313378 | <0.0001 | 1.13E-04 |
| MORI IMMATURE B LYMPHOCYTE DN                  | 90  | 0.84193  | 2.311813 | <0.0001 | 1.11E-04 |
| PEART HDAC PROLIFERATION CLUSTER DN            | 73  | 0.661291 | 2.311469 | <0.0001 | 1.09E-04 |
| MORI EMU MYC LYMPHOMA BY ONSET TIME UP         | 99  | 0.683707 | 2.305759 | <0.0001 | 1.23E-04 |
| WHITFIELD CELL CYCLE G1 S                      | 128 | 0.632909 | 2.305621 | <0.0001 | 1.21E-04 |
| PID ATR PATHWAY                                | 39  | 0.835218 | 2.305482 | <0.0001 | 1.19E-04 |
| KAUFFMANN DNA REPAIR GENES                     | 219 | 0.635751 | 2.303722 | <0.0001 | 1.17E-04 |
| PID AURORA A PATHWAY                           | 30  | 0.755255 | 2.302697 | <0.0001 | 1.16E-04 |
| PENG LEUCINE DEPRIVATION DN                    | 182 | 0.669002 | 2.297153 | <0.0001 | 1.45E-04 |
| MUELLER PLURINET                               | 296 | 0.674754 | 2.296901 | <0.0001 | 1.43E-04 |
| MISSIAGLIA REGULATED BY METHYLATION DN         | 115 | 0.821504 | 2.29341  | <0.0001 | 1.65E-04 |
| NAKAYAMA SOFT TISSUE TUMORS PCA2 UP            | 86  | 0.783035 | 2.293213 | <0.0001 | 1.62E-04 |
| GRAHAM CML QUIESCENT VS NORMAL QUIESCENT UP    | 80  | 0.659527 | 2.291676 | <0.0001 | 1.84E-04 |
| PUJANA BRCA CENTERED NETWORK                   | 114 | 0.82377  | 2.289912 | <0.0001 | 1.81E-04 |
| PETROVA PROX1 TARGETS UP                       | 27  | 0.830786 | 2.286639 | <0.0001 | 1.79E-04 |
| PAL PRMT5 TARGETS UP                           | 195 | 0.628681 | 2.285923 | <0.0001 | 1.77E-04 |
| WU APOPTOSIS BY CDKN1A VIA TP53                | 54  | 0.898918 | 2.28489  | <0.0001 | 1.74E-04 |
| HORIUCHI WTAP TARGETS DN                       | 293 | 0.69568  | 2.284683 | <0.0001 | 1.72E-04 |
| ZHOU CELL CYCLE GENES IN IR RESPONSE 24HR      | 119 | 0.848455 | 2.284447 | <0.0001 | 1.70E-04 |
| BENPORATH ES 2                                 | 39  | 0.743048 | 2.283872 | <0.0001 | 1.68E-04 |
| PUJANA XPRSS INT NETWORK                       | 161 | 0.794019 | 2.283369 | <0.0001 | 1.66E-04 |
| KONG E2F3 TARGETS                              | 94  | 0.886932 | 2.280455 | <0.0001 | 1.94E-04 |

|                                                            |     |          |          |          |          |
|------------------------------------------------------------|-----|----------|----------|----------|----------|
| BENPORATH ES 1                                             | 356 | 0.622392 | 2.278398 | <0.0001  | 1.91E-04 |
| WHITEFORD PEDIATRIC CANCER MARKERS                         | 111 | 0.871876 | 2.275522 | <0.0001  | 2.09E-04 |
| WINNEPENNINCKX MELANOMA METASTASIS UP                      | 151 | 0.817942 | 2.274679 | <0.0001  | 2.06E-04 |
| PID FOXM1 PATHWAY                                          | 40  | 0.759672 | 2.27461  | <0.0001  | 2.04E-04 |
| MORI LARGE PRE BII LYMPHOCYTE UP                           | 84  | 0.831443 | 2.274032 | <0.0001  | 2.02E-04 |
| TANG SENESENCE TP53 TARGETS DN                             | 54  | 0.88528  | 2.27163  | <0.0001  | 2.08E-04 |
| GOLDRATH ANTIGEN RESPONSE                                  | 331 | 0.603479 | 2.271496 | <0.0001  | 2.05E-04 |
| LABBE WNT3A TARGETS UP                                     | 108 | 0.544691 | 2.271423 | <0.0001  | 2.03E-04 |
| GARCIA TARGETS OF FLI1 AND DAX1 DN                         | 163 | 0.651642 | 2.26735  | <0.0001  | 2.01E-04 |
| MOLENAAR TARGETS OF CCND1 AND CDK4 DN                      | 51  | 0.866696 | 2.260139 | <0.0001  | 2.26E-04 |
| VERNELL RETINOBLASTOMA PATHWAY UP                          | 68  | 0.801729 | 2.259285 | <0.0001  | 2.40E-04 |
| PENG GLUTAMINE DEPRIVATION DN                              | 324 | 0.616227 | 2.255061 | <0.0001  | 2.77E-04 |
| GRAHAM NORMAL QUIESCENT VS NORMAL DIVIDING DN              | 85  | 0.886554 | 2.250934 | <0.0001  | 2.74E-04 |
| ZHANG TLX TARGETS DN                                       | 87  | 0.892133 | 2.250629 | <0.0001  | 2.79E-04 |
| FERRANDO T ALL WITH MLL ENL FUSION DN                      | 83  | 0.633776 | 2.249271 | 0.002004 | 2.76E-04 |
| TARTE PLASMA CELL VS PLASMABLAST DN                        | 300 | 0.665856 | 2.247513 | 0.002033 | 2.81E-04 |
| REACTOME DNA REPLICATION                                   | 180 | 0.770362 | 2.246521 | <0.0001  | 2.94E-04 |
| MITSIADES RESPONSE TO APLIDIN DN                           | 239 | 0.699376 | 2.245892 | <0.0001  | 2.99E-04 |
| GARGALOVIC RESPONSE TO OXIDIZED PHOSPHOLIPIDS TURQUOISE DN | 50  | 0.749052 | 2.244419 | <0.0001  | 2.96E-04 |
| MARKEY RB1 CHRONIC LOF UP                                  | 111 | 0.582982 | 2.244265 | <0.0001  | 2.93E-04 |
| WANG CISPLATIN RESPONSE AND XPC UP                         | 190 | 0.548017 | 2.244199 | <0.0001  | 2.91E-04 |
| XU HGF SIGNALING NOT VIA AKT1 48HR DN                      | 20  | 0.805235 | 2.243348 | <0.0001  | 2.88E-04 |
| OLSSON E2F3 TARGETS DN                                     | 45  | 0.706133 | 2.240486 | <0.0001  | 2.85E-04 |
| ZHOU CELL CYCLE GENES IN IR RESPONSE 6HR                   | 80  | 0.886257 | 2.233605 | <0.0001  | 3.43E-04 |
| FAELT B CLL WITH VH3 21 UP                                 | 42  | 0.702863 | 2.231728 | <0.0001  | 3.46E-04 |
| PYEON HPV POSITIVE TUMORS UP                               | 84  | 0.715883 | 2.229796 | <0.0001  | 3.59E-04 |
| YU BAP1 TARGETS                                            | 29  | 0.753985 | 2.229632 | <0.0001  | 3.56E-04 |
| LY AGING PREMATURE DN                                      | 29  | 0.836252 | 2.229195 | <0.0001  | 3.52E-04 |
| GAL LEUKEMIC STEM CELL DN                                  | 233 | 0.552276 | 2.223748 | <0.0001  | 3.65E-04 |
| PID AURORA B PATHWAY                                       | 37  | 0.800533 | 2.223034 | <0.0001  | 3.61E-04 |
| SCIBETTA KDM5B TARGETS DN                                  | 77  | 0.624447 | 2.222436 | <0.0001  | 3.58E-04 |
| REACTOME MITOTIC G2 G2 M PHASES                            | 77  | 0.664858 | 2.222397 | <0.0001  | 3.55E-04 |
| PUJANA BREAST CANCER WITH BRCA1 MUTATED UP                 | 54  | 0.869048 | 2.221128 | <0.0001  | 3.65E-04 |
| PID PLK1 PATHWAY                                           | 43  | 0.799871 | 2.218306 | <0.0001  | 3.78E-04 |
| REACTOME GLUCOSE TRANSPORT                                 | 37  | 0.7291   | 2.215784 | <0.0001  | 3.98E-04 |
| BURTON ADIPOGENESIS PEAK AT 16HR                           | 40  | 0.791977 | 2.21548  | <0.0001  | 4.08E-04 |
| BENPORATH PROLIFERATION                                    | 136 | 0.786101 | 2.21383  | <0.0001  | 4.04E-04 |
| STEIN ESR1 TARGETS                                         | 82  | 0.588458 | 2.213415 | <0.0001  | 4.01E-04 |
| REN BOUND BY E2F                                           | 60  | 0.88408  | 2.210404 | <0.0001  | 4.05E-04 |
| CHIARADONNA NEOPLASTIC TRANSFORMATION KRAS UP              | 121 | 0.622287 | 2.20852  | <0.0001  | 4.21E-04 |
| ODONNELL TARGETS OF MYC AND TFRC DN                        | 43  | 0.869258 | 2.206679 | <0.0001  | 4.40E-04 |
| CHANG CORE SERUM RESPONSE UP                               | 198 | 0.666035 | 2.198774 | <0.0001  | 5.36E-04 |
| BIDUS METASTASIS UP                                        | 204 | 0.702124 | 2.196377 | <0.0001  | 5.52E-04 |
| ZHANG TLX TARGETS 36HR DN                                  | 182 | 0.782349 | 2.195435 | <0.0001  | 5.55E-04 |

|                                                                         |     |          |          |         |          |
|-------------------------------------------------------------------------|-----|----------|----------|---------|----------|
| VANTVEER BREAST CANCER METASTASIS DN                                    | 111 | 0.723795 | 2.19513  | <0.0001 | 5.51E-04 |
| REACTOME G2 M CHECKPOINTS                                               | 41  | 0.878442 | 2.193896 | <0.0001 | 5.63E-04 |
| REACTOME MITOTIC M M G1 PHASES                                          | 160 | 0.754996 | 2.193351 | <0.0001 | 5.59E-04 |
| REACTOME TRANSPORT OF MATURE TRANSCRIPT TO CYTOPLASM                    | 51  | 0.723601 | 2.19295  | <0.0001 | 5.60E-04 |
| ABRAMSON INTERACT WITH AIRE                                             | 44  | 0.781407 | 2.191665 | <0.0001 | 5.61E-04 |
| CHICAS RB1 TARGETS GROWING                                              | 225 | 0.621861 | 2.191629 | <0.0001 | 5.57E-04 |
| BHATTACHARYA EMBRYONIC STEM CELL                                        | 86  | 0.692871 | 2.191613 | <0.0001 | 5.53E-04 |
| WEST ADRENOCORTICAL TUMOR UP                                            | 282 | 0.62801  | 2.190665 | <0.0001 | 5.60E-04 |
| GEORGES CELL CYCLE MIR192 TARGETS                                       | 61  | 0.727622 | 2.189875 | <0.0001 | 5.64E-04 |
| KEGG DNA REPLICATION                                                    | 36  | 0.881792 | 2.188927 | <0.0001 | 5.79E-04 |
| BOYALT LIVER CANCER SUBCLASS G3 UP                                      | 181 | 0.719776 | 2.186208 | <0.0001 | 5.99E-04 |
| VANTVEER BREAST CANCER ESR1 DN                                          | 226 | 0.574753 | 2.183449 | <0.0001 | 6.48E-04 |
| LY AGING OLD DN                                                         | 55  | 0.793099 | 2.182936 | <0.0001 | 6.44E-04 |
| DANG REGULATED BY MYC UP                                                | 71  | 0.656173 | 2.181595 | <0.0001 | 6.51E-04 |
| SENGUPTA NASOPHARYNGEAL CARCINOMA UP                                    | 275 | 0.64308  | 2.178788 | <0.0001 | 6.58E-04 |
| REACTOME MITOTIC PROMETAPHASE                                           | 78  | 0.768087 | 2.176139 | <0.0001 | 6.86E-04 |
| RHODES CANCER META SIGNATURE                                            | 63  | 0.75136  | 2.175686 | <0.0001 | 6.87E-04 |
| SONG TARGETS OF IE86 CMV PROTEIN                                        | 58  | 0.839873 | 2.171904 | <0.0001 | 7.27E-04 |
| REACTOME MRNA PROCESSING                                                | 151 | 0.637036 | 2.17165  | <0.0001 | 7.22E-04 |
| ROSTY CERVICAL CANCER PROLIFERATION CLUSTER                             | 133 | 0.904753 | 2.170918 | <0.0001 | 7.29E-04 |
| FRASOR RESPONSE TO SERM OR FULVESTRANT DN                               | 50  | 0.848255 | 2.168967 | <0.0001 | 7.45E-04 |
| GREENBAUM E2A TARGETS UP                                                | 32  | 0.884223 | 2.168952 | <0.0001 | 7.40E-04 |
| KEGG HOMOLOGOUS RECOMBINATION                                           | 26  | 0.811003 | 2.166975 | <0.0001 | 7.54E-04 |
| GROSS HYPOXIA VIA ELK3 UP                                               | 198 | 0.497359 | 2.165637 | <0.0001 | 7.67E-04 |
| GRADE COLON AND RECTAL CANCER UP                                        | 272 | 0.628431 | 2.163404 | <0.0001 | 8.11E-04 |
| THILLAINADESAN ZNF217 TARGETS UP                                        | 42  | 0.663378 | 2.160018 | <0.0001 | 8.46E-04 |
| JAEGER METASTASIS UP                                                    | 43  | 0.719422 | 2.159601 | <0.0001 | 8.40E-04 |
| KAUFFMANN MELANOMA RELAPSE UP                                           | 59  | 0.858715 | 2.15951  | <0.0001 | 8.35E-04 |
| CHEN ETV5 TARGETS TESTIS                                                | 21  | 0.848038 | 2.158898 | <0.0001 | 8.35E-04 |
| RHODES UNDIFFERENTIATED CANCER                                          | 67  | 0.846356 | 2.15832  | <0.0001 | 8.41E-04 |
| REACTOME HIV LIFE CYCLE                                                 | 105 | 0.625698 | 2.156117 | <0.0001 | 8.79E-04 |
| PID ATM PATHWAY                                                         | 33  | 0.723995 | 2.152404 | <0.0001 | 9.45E-04 |
| WEST ADRENOCORTICAL TUMOR MARKERS UP                                    | 21  | 0.827331 | 2.151475 | <0.0001 | 9.58E-04 |
| SOTIRIOU BREAST CANCER GRADE 1 VS 3 UP                                  | 141 | 0.911728 | 2.150769 | <0.0001 | 9.58E-04 |
| REACTOME TRANSPORT OF MATURE MRNA DERIVED FROM AN INTRONLESS TRANSCRIPT | 31  | 0.78993  | 2.150719 | <0.0001 | 9.52E-04 |
| REACTOME ACTIVATION OF ATR IN RESPONSE TO REPLICATION STRESS            | 35  | 0.876601 | 2.150423 | <0.0001 | 9.46E-04 |
| REACTOME PROCESSING OF CAPPED INTRON CONTAINING PRE MRNA                | 132 | 0.65681  | 2.149792 | <0.0001 | 9.80E-04 |
| SANSOM APC TARGETS REQUIRE MYC                                          | 192 | 0.54353  | 2.149358 | <0.0001 | 9.74E-04 |
| REACTOME RECRUITMENT OF MITOTIC CENTROSOME PROTEINS AND COMPLEXES       | 62  | 0.633393 | 2.147291 | <0.0001 | 1.00E-03 |
| BOYALT LIVER CANCER SUBCLASS G23 UP                                     | 49  | 0.78964  | 2.14394  | <0.0001 | 0.001058 |
| PUIFFE INVASION INHIBITED BY ASCITES UP                                 | 81  | 0.571522 | 2.142774 | <0.0001 | 0.001063 |
| WHITFIELD CELL CYCLE LITERATURE                                         | 44  | 0.913939 | 2.141911 | <0.0001 | 0.001057 |

|                                                                      |     |          |          |          |          |
|----------------------------------------------------------------------|-----|----------|----------|----------|----------|
| WELCSH BRCA1 TARGETS DN                                              | 139 | 0.609454 | 2.140259 | <0.0001  | 0.001085 |
| REACTOME DNA REPAIR                                                  | 101 | 0.629986 | 2.139719 | <0.0001  | 0.001095 |
| DELPUECH FOXO3 TARGETS DN                                            | 39  | 0.756195 | 2.137588 | <0.0001  | 0.001135 |
| REACTOME EXTENSION OF TELOMERES                                      | 27  | 0.881087 | 2.13467  | <0.0001  | 0.001191 |
| REACTOME DNA STRAND ELONGATION                                       | 30  | 0.929324 | 2.133741 | <0.0001  | 0.001214 |
| WHITFIELD CELL CYCLE S                                               | 147 | 0.591354 | 2.130671 | <0.0001  | 0.001287 |
| ISHIDA E2F TARGETS                                                   | 50  | 0.921924 | 2.128528 | <0.0001  | 0.00132  |
| REACTOME E2F MEDIATED REGULATION OF DNA REPLICATION                  | 33  | 0.805744 | 2.127428 | <0.0001  | 0.00133  |
| XU HGF TARGETS INDUCED BY AKT1 48HR DN                               | 24  | 0.76192  | 2.126319 | <0.0001  | 0.001362 |
| FOURNIER ACINAR DEVELOPMENT LATE DN                                  | 21  | 0.836678 | 2.126291 | <0.0001  | 0.001355 |
| KANG DOXORUBICIN RESISTANCE UP                                       | 50  | 0.959832 | 2.12497  | <0.0001  | 0.001378 |
| BIOCARTA MCM PATHWAY                                                 | 18  | 0.894425 | 2.124591 | <0.0001  | 0.001375 |
| PID MYC ACTIV PATHWAY                                                | 78  | 0.630986 | 2.123963 | <0.0001  | 0.001385 |
| ZAMORA NOS2 TARGETS UP                                               | 64  | 0.658205 | 2.122983 | <0.0001  | 0.001412 |
| WONG EMBRYONIC STEM CELL CORE                                        | 330 | 0.685597 | 2.112932 | 0.001931 | 0.001619 |
| AMUNDSON GAMMA RADIATION RESPONSE                                    | 40  | 0.866518 | 2.112331 | <0.0001  | 0.001637 |
| SUNG METASTASIS STROMA DN                                            | 49  | 0.669221 | 2.11179  | <0.0001  | 0.001656 |
| KOKKINAKIS METHIONINE DEPRIVATION 96HR DN                            | 75  | 0.571024 | 2.111435 | <0.0001  | 0.001657 |
| WILLIAMS ESR1 TARGETS UP                                             | 26  | 0.673158 | 2.111164 | <0.0001  | 0.001658 |
| BIOCARTA G2 PATHWAY                                                  | 24  | 0.74592  | 2.110856 | <0.0001  | 0.001654 |
| GINESTIER BREAST CANCER 20Q13 AMPLIFICATION DN                       | 151 | 0.588402 | 2.108311 | <0.0001  | 0.001702 |
| YU MYC TARGETS UP                                                    | 39  | 0.866203 | 2.10712  | <0.0001  | 0.001709 |
| REACTOME ACTIVATION OF THE PRE REPLICATIVE COMPLEX                   | 30  | 0.895076 | 2.106946 | <0.0001  | 0.0017   |
| KAMMINGA EZH2 TARGETS                                                | 41  | 0.881167 | 2.106422 | <0.0001  | 0.001695 |
| HESS TARGETS OF HOXA9 AND MEIS1 UP                                   | 63  | 0.602291 | 2.105219 | <0.0001  | 0.001705 |
| REACTOME MITOTIC G1 G1 S PHASES                                      | 130 | 0.689553 | 2.103447 | 0.00198  | 0.001735 |
| REACTOME SYNTHESIS OF DNA                                            | 90  | 0.75547  | 2.103255 | 0.001946 | 0.001726 |
| WANG METASTASIS OF BREAST CANCER ESR1 UP                             | 19  | 0.85497  | 2.103049 | <0.0001  | 0.001722 |
| REACTOME REGULATION OF GLUCOKINASE BY GLUCOKINASE REGULATORY PROTEIN | 26  | 0.771778 | 2.099896 | <0.0001  | 0.001785 |
| KEGG MISMATCH REPAIR                                                 | 23  | 0.800884 | 2.099178 | <0.0001  | 0.00179  |
| NUNODA RESPONSE TO DASATINIB IMATINIB UP                             | 29  | 0.652181 | 2.09755  | <0.0001  | 0.001821 |
| STANELLE E2F1 TARGETS                                                | 27  | 0.594432 | 2.095453 | <0.0001  | 0.001877 |
| CUI TCF21 TARGETS 2 UP                                               | 404 | 0.486541 | 2.093327 | <0.0001  | 0.001933 |
| MATTIOLI MGUS VS PCL                                                 | 93  | 0.578283 | 2.09257  | 0.002008 | 0.00194  |
| ZHAN MULTIPLE MYELOMA SUBGROUPS                                      | 30  | 0.806344 | 2.09204  | <0.0001  | 0.001931 |
| REACTOME S PHASE                                                     | 106 | 0.719442 | 2.090513 | 0.001931 | 0.001971 |
| REACTOME LOSS OF NLP FROM MITOTIC CENTROSOMES                        | 55  | 0.634169 | 2.090493 | <0.0001  | 0.001962 |
| REACTOME LATE PHASE OF HIV LIFE CYCLE                                | 92  | 0.616493 | 2.089722 | <0.0001  | 0.001971 |
| PID FANCONI PATHWAY                                                  | 43  | 0.762282 | 2.089032 | <0.0001  | 0.001968 |
| REACTOME ANTIVIRAL MECHANISM BY IFN STIMULATED GENES                 | 64  | 0.624437 | 2.087877 | <0.0001  | 0.002011 |

|                                                                 |     |          |          |          |          |
|-----------------------------------------------------------------|-----|----------|----------|----------|----------|
| REICHERT MITOSIS LIN9 TARGETS                                   | 27  | 0.921414 | 2.085688 | <0.0001  | 0.002063 |
| SLEBOS HEAD AND NECK CANCER WITH HPV UP                         | 78  | 0.678077 | 2.084783 | <0.0001  | 0.002062 |
| WINTER HYPOXIA UP                                               | 88  | 0.636414 | 2.08418  | <0.0001  | 0.002065 |
| REACTOME INTERACTIONS OF VPR WITH HOST CELLULAR PROTEINS        | 31  | 0.743304 | 2.08228  | <0.0001  | 0.002134 |
| REACTOME NEP NS2 INTERACTS WITH THE CELLULAR EXPORT MACHINERY   | 26  | 0.798508 | 2.081939 | <0.0001  | 0.002146 |
| REACTOME TRANSPORT OF RIBONUCLEOPROTEINS INTO THE HOST NUCLEUS  | 26  | 0.79971  | 2.08071  | <0.0001  | 0.002186 |
| BOYAULT LIVER CANCER SUBCLASS G123 UP                           | 44  | 0.741986 | 2.080435 | <0.0001  | 0.002185 |
| SU TESTIS                                                       | 67  | 0.640624 | 2.079646 | <0.0001  | 0.002191 |
| MOHANKUMAR HOXA1 TARGETS UP                                     | 384 | 0.497657 | 2.079488 | <0.0001  | 0.002185 |
| REACTOME CELL CYCLE CHECKPOINTS                                 | 111 | 0.724142 | 2.077745 | <0.0001  | 0.00222  |
| PID BARD1 PATHWAY                                               | 28  | 0.776418 | 2.07737  | <0.0001  | 0.002214 |
| SERVITJA LIVER HNF1A TARGETS UP                                 | 132 | 0.480138 | 2.076758 | <0.0001  | 0.002218 |
| SASAKI ADULT T CELL LEUKEMIA                                    | 168 | 0.541987 | 2.07645  | <0.0001  | 0.002216 |
| REACTOME FORMATION OF TUBULIN FOLDING INTERMEDIATES BY CCT TRIC | 21  | 0.790064 | 2.074503 | <0.0001  | 0.002284 |
| VANTVEER BREAST CANCER POOR PROGNOSIS                           | 50  | 0.615508 | 2.072005 | <0.0001  | 0.002374 |
| NAKAMURA CANCER MICROENVIRONMENT DN                             | 43  | 0.77325  | 2.071477 | <0.0001  | 0.002387 |
| PYEON CANCER HEAD AND NECK VS CERVICAL UP                       | 169 | 0.622744 | 2.067814 | 0.001901 | 0.002527 |
| SIMBULAN PARP1 TARGETS DN                                       | 17  | 0.891198 | 2.066801 | <0.0001  | 0.002564 |
| GENTILE RESPONSE CLUSTER D3                                     | 61  | 0.597491 | 2.066162 | <0.0001  | 0.002581 |
| HONRADO BREAST CANCER BRCA1 VS BRCA2                            | 18  | 0.751023 | 2.064675 | <0.0001  | 0.002622 |
| REACTOME LAGGING STRAND SYNTHESIS                               | 19  | 0.906143 | 2.060474 | <0.0001  | 0.002824 |
| NAKAMURA TUMOR ZONE PERIPHERAL VS CENTRAL UP                    | 267 | 0.556121 | 2.057963 | <0.0001  | 0.00293  |
| REACTOME HOST INTERACTIONS OF HIV FACTORS                       | 117 | 0.611248 | 2.054864 | 0.001984 | 0.00304  |
| PETROVA ENDOTHELIUM LYMPHATIC VS BLOOD UP                       | 126 | 0.527579 | 2.054503 | <0.0001  | 0.003051 |
| SMID BREAST CANCER LUMINAL A DN                                 | 18  | 0.906986 | 2.046908 | <0.0001  | 0.003367 |
| MATZUK MEIOTIC AND DNA REPAIR                                   | 35  | 0.625582 | 2.044516 | 0.002016 | 0.003486 |
| KEGG BASE EXCISION REPAIR                                       | 33  | 0.66736  | 2.041335 | <0.0001  | 0.003611 |
| SMIRNOV RESPONSE TO IR 6HR DN                                   | 108 | 0.576037 | 2.036821 | <0.0001  | 0.00381  |
| WILCOX RESPONSE TO PROGESTERONE UP                              | 140 | 0.558499 | 2.036707 | <0.0001  | 0.003807 |
| REACTOME HIV INFECTION                                          | 184 | 0.574529 | 2.033981 | 0.002024 | 0.003928 |
| LE NEURONAL DIFFERENTIATION DN                                  | 19  | 0.785866 | 2.033888 | <0.0001  | 0.003926 |
| WAKASUGI HAVE ZNF143 BINDING SITES                              | 56  | 0.640048 | 2.033449 | <0.0001  | 0.003931 |
| REACTOME G1 S TRANSITION                                        | 106 | 0.705011 | 2.033273 | 0.001961 | 0.003926 |
| SHIPP DLBCL VS FOLLICULAR LYMPHOMA UP                           | 44  | 0.715433 | 2.0317   | <0.0001  | 0.004019 |
| REACTOME G1 S SPECIFIC TRANSCRIPTION                            | 17  | 0.887317 | 2.031275 | <0.0001  | 0.004022 |
| YAMAZAKI TCEB3 TARGETS DN                                       | 204 | 0.51882  | 2.028697 | <0.0001  | 0.004127 |
| JEON SMAD6 TARGETS DN                                           | 19  | 0.753473 | 2.027249 | <0.0001  | 0.004151 |
| ZHAN MULTIPLE MYELOMA PR UP                                     | 43  | 0.9348   | 2.026491 | <0.0001  | 0.00416  |
| REACTOME KINESINS                                               | 23  | 0.787591 | 2.024085 | 0.002012 | 0.004296 |
| MATZUK SPERMATOCYTE                                             | 68  | 0.526375 | 2.022173 | <0.0001  | 0.004388 |

|                                                                                                                |     |          |          |          |          |
|----------------------------------------------------------------------------------------------------------------|-----|----------|----------|----------|----------|
| LI WILMS TUMOR ANAPLASTIC UP                                                                                   | 19  | 0.928738 | 2.020802 | <0.0001  | 0.004485 |
| SA G1 AND S PHASES                                                                                             | 15  | 0.723232 | 2.018772 | 0.00202  | 0.004604 |
| BOYLAN MULTIPLE MYELOMA C CLUSTER UP                                                                           | 37  | 0.582256 | 2.017723 | <0.0001  | 0.004658 |
| GROSS HYPOXIA VIA ELK3 ONLY DN                                                                                 | 41  | 0.550316 | 2.014632 | <0.0001  | 0.004829 |
| CAFFAREL RESPONSE TO THC DN                                                                                    | 29  | 0.713056 | 2.014072 | <0.0001  | 0.004829 |
| CHAUHAN RESPONSE TO METHOXYESTRADIOL UP                                                                        | 50  | 0.598643 | 2.012912 | <0.0001  | 0.004873 |
| REACTOME G0 AND EARLY G1                                                                                       | 23  | 0.782151 | 2.010308 | <0.0001  | 0.005011 |
| BIOCARTA G1 PATHWAY                                                                                            | 28  | 0.658731 | 2.010183 | <0.0001  | 0.005002 |
| KEGG SPLICEOSOME                                                                                               | 123 | 0.593228 | 2.007755 | <0.0001  | 0.005142 |
| REACTOME PROGRESSIVE SYNTHESIS ON THE LAGGING STRAND                                                           | 15  | 0.887818 | 2.005355 | <0.0001  | 0.005267 |
| SCIAN CELL CYCLE TARGETS OF TP53 AND TP73 DN                                                                   | 22  | 0.879797 | 2.005096 | <0.0001  | 0.005257 |
| KEGG OOCYTE MEIOSIS                                                                                            | 107 | 0.513166 | 2.002527 | 0.002045 | 0.005389 |
| PENG RAPAMYCIN RESPONSE DN                                                                                     | 230 | 0.5871   | 2.002149 | <0.0001  | 0.005425 |
| REACTOME APC CDC20 MEDIATED DEGRADATION OF NEK2A                                                               | 21  | 0.783271 | 1.999412 | <0.0001  | 0.005595 |
| PID P73PATHWAY                                                                                                 | 76  | 0.511208 | 1.99822  | <0.0001  | 0.00567  |
| SANSOM APC MYC TARGETS                                                                                         | 198 | 0.441858 | 1.997603 | <0.0001  | 0.005701 |
| LY AGING MIDDLE DN                                                                                             | 16  | 0.9695   | 1.99711  | <0.0001  | 0.005707 |
| BASSO B LYMPHOCYTE NETWORK                                                                                     | 135 | 0.521596 | 1.996411 | 0.001972 | 0.005742 |
| LAU APOPTOSIS CDKN2A UP                                                                                        | 55  | 0.535261 | 1.995455 | <0.0001  | 0.005797 |
| REACTOME CHROMOSOME MAINTENANCE                                                                                | 112 | 0.704528 | 1.992625 | <0.0001  | 0.005991 |
| REACTOME MRNA SPLICING                                                                                         | 104 | 0.620392 | 1.992351 | <0.0001  | 0.005991 |
| GROSS HYPOXIA VIA ELK3 AND HIF1A DN                                                                            | 100 | 0.468281 | 1.992147 | <0.0001  | 0.005984 |
| KEGG PROGESTERONE MEDIATED OOCYTE MATURATION                                                                   | 83  | 0.494061 | 1.991438 | <0.0001  | 0.006005 |
| REACTOME METABOLISM OF NON CODING RNA                                                                          | 47  | 0.702641 | 1.989715 | <0.0001  | 0.006114 |
| REACTOME HOMOLOGOUS RECOMBINATION REPAIR OF REPLICATION INDEPENDENT DOUBLE STRAND BREAKS                       | 15  | 0.795836 | 1.988127 | 0.001901 | 0.006189 |
| REACTOME M G1 TRANSITION                                                                                       | 78  | 0.740495 | 1.985265 | 0.00198  | 0.006396 |
| BIOCARTA ATRBRCA PATHWAY                                                                                       | 19  | 0.762603 | 1.979125 | <0.0001  | 0.006858 |
| BILD MYC ONCOGENIC SIGNATURE                                                                                   | 187 | 0.476209 | 1.977043 | 0.002079 | 0.007043 |
| ELVIDGE HYPOXIA DN                                                                                             | 136 | 0.520392 | 1.976719 | <0.0001  | 0.007049 |
| YAO TEMPORAL RESPONSE TO PROGESTERONE CLUSTER 11                                                               | 95  | 0.566186 | 1.976506 | 0.002062 | 0.007043 |
| RAMASWAMY METASTASIS UP                                                                                        | 64  | 0.546034 | 1.976347 | <0.0001  | 0.007042 |
| JOHANSSON GLIOMAGENESIS BY PDGFB UP                                                                            | 57  | 0.576944 | 1.975038 | 0.002083 | 0.007111 |
| ENK UV RESPONSE EPIDERMIS UP                                                                                   | 277 | 0.457464 | 1.973899 | <0.0001  | 0.007174 |
| PID RB 1PATHWAY                                                                                                | 65  | 0.496958 | 1.97231  | 0.002062 | 0.007291 |
| MEINHOLD OVARIAN CANCER LOW GRADE DN                                                                           | 20  | 0.776498 | 1.970919 | <0.0001  | 0.007416 |
| SCHLOSSER SERUM RESPONSE AUGMENTED BY MYC                                                                      | 101 | 0.486546 | 1.96799  | <0.0001  | 0.007669 |
| CHANDRAN METASTASIS UP                                                                                         | 191 | 0.466812 | 1.967911 | <0.0001  | 0.007652 |
| REACTOME INHIBITION OF THE PROTEOLYTIC ACTIVITY OF APC C REQUIRED FOR THE ONSET OF ANAPHASE BY MITOTIC SPINDLE | 18  | 0.79346  | 1.966908 | <0.0001  | 0.007763 |

|                                                                                      |     |          |          |          |          |
|--------------------------------------------------------------------------------------|-----|----------|----------|----------|----------|
| CHECKPOINT COMPONENTS                                                                |     |          |          |          |          |
| REACTOME BASE EXCISION REPAIR                                                        | 19  | 0.736942 | 1.965773 | <0.0001  | 0.007849 |
| BHAT ESR1 TARGETS VIA AKT1 UP                                                        | 267 | 0.440362 | 1.963363 | <0.0001  | 0.008057 |
| YANG BCL3 TARGETS UP                                                                 | 344 | 0.419185 | 1.961807 | <0.0001  | 0.008198 |
| EPPERT PROGENITOR                                                                    | 125 | 0.589314 | 1.960984 | 0.006012 | 0.008234 |
| REACTOME CLEAVAGE OF GROWING<br>TRANSCRIPT IN THE TERMINATION REGION                 | 42  | 0.644429 | 1.957844 | <0.0001  | 0.008602 |
| REACTOME DOUBLE STRAND BREAK REPAIR                                                  | 21  | 0.741136 | 1.952599 | 0.001931 | 0.009115 |
| EGUCHI CELL CYCLE RB1 TARGETS                                                        | 23  | 0.969321 | 1.949859 | <0.0001  | 0.009362 |
| BIOCARTA CELLCYCLE PATHWAY                                                           | 23  | 0.685744 | 1.949435 | <0.0001  | 0.009383 |
| REACTOME CYCLIN A B1 ASSOCIATED EVENTS<br>DURING G2 M TRANSITION                     | 15  | 0.849242 | 1.949138 | 0.002012 | 0.0094   |
| RICKMAN TUMOR DIFFERENTIATED<br>MODERATELY VS POORLY DN                              | 15  | 0.758615 | 1.947434 | <0.0001  | 0.009551 |
| SCHUHMACHER MYC TARGETS UP                                                           | 77  | 0.634432 | 1.946798 | 0.003914 | 0.009609 |
| LASTOWSKA NEUROBLASTOMA COPY NUMBER<br>UP                                            | 163 | 0.532851 | 1.943121 | 0.003992 | 0.010075 |
| JUBAN TARGETS OF SPI1 AND FLI1 DN                                                    | 84  | 0.52183  | 1.942098 | 0.001972 | 0.010154 |
| IWANAGA E2F1 TARGETS INDUCED BY SERUM                                                | 29  | 0.711711 | 1.940305 | 0.001927 | 0.010309 |
| REACTOME PHOSPHORYLATION OF THE APC C                                                | 17  | 0.782124 | 1.939369 | <0.0001  | 0.010389 |
| BURTON ADIPOGENESIS 4                                                                | 44  | 0.575164 | 1.938206 | 0.004167 | 0.010525 |
| HERNANDEZ MITOTIC ARREST BY DOCETAXEL<br>1 DN                                        | 36  | 0.60557  | 1.937816 | <0.0001  | 0.010512 |
| BHATI G2M ARREST BY 2METHOXYESTRADIOL<br>UP                                          | 108 | 0.497994 | 1.936528 | <0.0001  | 0.010634 |
| REACTOME PROCESSING OF CAPPED<br>INTRONLESS PRE MRNA                                 | 23  | 0.712659 | 1.934703 | <0.0001  | 0.010773 |
| JIANG HYPOXIA VIA VHL                                                                | 33  | 0.610943 | 1.934451 | 0.00198  | 0.010758 |
| GINESTIER BREAST CANCER ZNF217 AMPLIFIED<br>DN                                       | 303 | 0.55689  | 1.932361 | 0.008403 | 0.011003 |
| KIM WT1 TARGETS DN                                                                   | 427 | 0.471465 | 1.932234 | <0.0001  | 0.01099  |
| NIKOLSKY BREAST CANCER 12Q24 AMPLICON                                                | 15  | 0.847804 | 1.929698 | 0.002088 | 0.011272 |
| RIZ ERYTHROID DIFFERENTIATION CCNE1                                                  | 39  | 0.53327  | 1.928633 | <0.0001  | 0.011413 |
| REACTOME MRNA 3 END PROCESSING                                                       | 33  | 0.656334 | 1.924507 | 0.001916 | 0.011951 |
| SANSOM APC TARGETS UP                                                                | 113 | 0.453162 | 1.924256 | <0.0001  | 0.011964 |
| REACTOME FACTORS INVOLVED IN<br>MEGAKARYOCYTE DEVELOPMENT AND<br>PLATELET PRODUCTION | 111 | 0.487684 | 1.923137 | <0.0001  | 0.012068 |
| REACTOME ASSEMBLY OF THE PRE<br>REPLICATIVE COMPLEX                                  | 63  | 0.724831 | 1.921464 | 0.001976 | 0.012279 |
| FARMER BREAST CANCER CLUSTER 2                                                       | 32  | 0.916967 | 1.919269 | <0.0001  | 0.01256  |
| NAGY TFTC COMPONENTS HUMAN                                                           | 18  | 0.658953 | 1.918653 | <0.0001  | 0.012624 |
| BILD E2F3 ONCOGENIC SIGNATURE                                                        | 222 | 0.431774 | 1.917682 | <0.0001  | 0.012713 |
| LEE LIVER CANCER SURVIVAL DN                                                         | 165 | 0.613091 | 1.917151 | 0.002024 | 0.012742 |
| WONG PROTEASOME GENE MODULE                                                          | 49  | 0.650704 | 1.915606 | <0.0001  | 0.01295  |
| REACTOME GLOBAL GENOMIC NER GG NER                                                   | 32  | 0.646461 | 1.91298  | <0.0001  | 0.013271 |
| KEGG GLYOXYLATE AND DICARBOXYLATE<br>METABOLISM                                      | 16  | 0.72315  | 1.912502 | 0.001957 | 0.01332  |
| OUELLET OVARIAN CANCER INVASIVE VS LMP                                               | 117 | 0.584398 | 1.912028 | 0.00404  | 0.013357 |



|                                                                                       |     |          |          |          |          |
|---------------------------------------------------------------------------------------|-----|----------|----------|----------|----------|
| UP                                                                                    |     |          |          |          |          |
| BOHN PRIMARY IMMUNODEFICIENCY SYNDROM UP                                              | 45  | 0.58582  | 1.909768 | 0.001988 | 0.013632 |
| GENTLES LEUKEMIC STEM CELL DN                                                         | 18  | 0.709169 | 1.908006 | 0.002037 | 0.01388  |
| PEART HDAC PROLIFERATION CLUSTER UP                                                   | 55  | 0.531517 | 1.90765  | <0.0001  | 0.013901 |
| REACTOME FANCONI ANEMIA PATHWAY                                                       | 19  | 0.786802 | 1.907609 | 0.001976 | 0.013864 |
| PID TELOMERASE PATHWAY                                                                | 67  | 0.514617 | 1.905231 | 0.004032 | 0.014149 |
| LI WILMS TUMOR VS FETAL KIDNEY 2 UP                                                   | 29  | 0.652867 | 1.903723 | 0.005803 | 0.014376 |
| MONNIER POSTRADIATION TUMOR ESCAPE UP                                                 | 374 | 0.431026 | 1.898734 | 0.002053 | 0.01516  |
| PIONTEK PKD1 TARGETS DN                                                               | 16  | 0.710243 | 1.89749  | <0.0001  | 0.015304 |
| KRASNOSELSKAYA ILF3 TARGETS DN                                                        | 44  | 0.546053 | 1.896969 | <0.0001  | 0.015331 |
| REACTOME APC C CDC20 MEDIATED DEGRADATION OF CYCLIN B                                 | 19  | 0.750141 | 1.896512 | 0.001965 | 0.015375 |
| SMID BREAST CANCER RELAPSE IN LUNG UP                                                 | 20  | 0.666454 | 1.89343  | 0.002024 | 0.015846 |
| SHIN B CELL LYMPHOMA CLUSTER 8                                                        | 36  | 0.599433 | 1.892346 | 0.002058 | 0.015948 |
| REACTOME GLYCOLYSIS                                                                   | 25  | 0.640644 | 1.890798 | 0.002088 | 0.01626  |
| MORI SMALL PRE BII LYMPHOCYTE DN                                                      | 74  | 0.474081 | 1.890609 | 0.00198  | 0.016243 |
| LOPEZ TRANSLATION VIA FN1 SIGNALING                                                   | 34  | 0.553193 | 1.889538 | 0.00404  | 0.016358 |
| CAIRO PML TARGETS BOUND BY MYC UP                                                     | 23  | 0.654825 | 1.888087 | 0.01227  | 0.016569 |
| MODY HIPPOCAMPUS NEONATAL                                                             | 35  | 0.607488 | 1.887457 | 0.007843 | 0.016632 |
| REACTOME RESOLUTION OF AP SITES VIA THE MULTIPLE NUCLEOTIDE PATCH REPLACEMENT PATHWAY | 17  | 0.7289   | 1.887273 | 0.004024 | 0.01663  |
| FINETTI BREAST CANCER KINOME RED                                                      | 16  | 0.956155 | 1.887021 | <0.0001  | 0.016627 |
| REACTOME RNA POL II TRANSCRIPTION                                                     | 93  | 0.553349 | 1.886383 | 0.001931 | 0.016667 |
| DOANE BREAST CANCER CLASSES DN                                                        | 32  | 0.601599 | 1.886329 | 0.002058 | 0.01662  |
| REACTOME ORC1 REMOVAL FROM CHROMATIN                                                  | 65  | 0.702322 | 1.884071 | 0.002012 | 0.017005 |
| REACTOME REGULATION OF MITOTIC CELL CYCLE                                             | 77  | 0.685013 | 1.883218 | 0.002016 | 0.017095 |
| MENSSEN MYC TARGETS                                                                   | 51  | 0.655932 | 1.882209 | 0.006122 | 0.017221 |
| TONKS TARGETS OF RUNX1 RUNX1T1 FUSION MONOCYTE UP                                     | 195 | 0.466716 | 1.881605 | 0.004158 | 0.017313 |
| SESTO RESPONSE TO UV C4                                                               | 20  | 0.63672  | 1.880775 | 0.004219 | 0.017425 |
| HEDENFALK BREAST CANCER BRCA1 VS BRCA2                                                | 156 | 0.470417 | 1.880102 | 0.003976 | 0.017501 |
| WALLACE JAK2 TARGETS UP                                                               | 25  | 0.632531 | 1.875817 | 0.002066 | 0.018272 |
| REACTOME PREFOLDIN MEDIATED TRANSFER OF SUBSTRATE TO CCT TRIC                         | 27  | 0.686418 | 1.871294 | 0.004073 | 0.019122 |
| LEE METASTASIS AND RNA PROCESSING UP                                                  | 17  | 0.7356   | 1.870598 | 0.001965 | 0.019207 |
| REACTOME POST CHAPERONIN TUBULIN FOLDING PATHWAY                                      | 18  | 0.672857 | 1.870263 | 0.006012 | 0.019237 |
| FARMER BREAST CANCER CLUSTER 5                                                        | 18  | 0.786578 | 1.866916 | 0.001953 | 0.019888 |
| REACTOME TRANSCRIPTION COUPLED NER TC NER                                             | 43  | 0.607443 | 1.866313 | 0.00198  | 0.019951 |
| CHOW RASSF1 TARGETS UP                                                                | 26  | 0.59771  | 1.864912 | 0.004024 | 0.020155 |
| KARAKAS TGFB1 SIGNALING                                                               | 18  | 0.696527 | 1.864268 | 0.004149 | 0.020217 |
| SMITH TERT TARGETS UP                                                                 | 141 | 0.464406 | 1.863065 | 0.001972 | 0.020474 |
| TOMIDA METASTASIS UP                                                                  | 26  | 0.631341 | 1.862824 | 0.004175 | 0.020459 |
| COLINA TARGETS OF 4EBP1 AND 4EBP2                                                     | 346 | 0.40879  | 1.861381 | 0.001934 | 0.020702 |
| GRAESSMANN RESPONSE TO MC AND SERUM                                                   | 78  | 0.438816 | 1.861151 | <0.0001  | 0.020692 |

|                                                                     |     |          |          |          |          |
|---------------------------------------------------------------------|-----|----------|----------|----------|----------|
| DEPRIVATION DN                                                      |     |          |          |          |          |
| SCHLOSSER MYC TARGETS AND SERUM RESPONSE DN                         | 45  | 0.643542 | 1.860431 | 0.014085 | 0.020765 |
| REACTOME CONVERSION FROM APC C CDC20 TO APC C CDH1 IN LATE ANAPHASE | 16  | 0.709278 | 1.858078 | 0.001976 | 0.021259 |
| UDAYAKUMAR MED1 TARGETS UP                                          | 129 | 0.491122 | 1.857105 | <0.0001  | 0.021387 |
| BROWNE HCMV INFECTION 2HR DN                                        | 48  | 0.565526 | 1.854565 | 0.003992 | 0.021878 |
| YUAN ZNF143 PARTNERS                                                | 21  | 0.690491 | 1.854281 | 0.002016 | 0.02191  |
| CHIARETTI T ALL RELAPSE PROGNOSIS                                   | 19  | 0.691591 | 1.854114 | 0.001942 | 0.021893 |
| KARLSSON TGFB1 TARGETS UP                                           | 118 | 0.554544 | 1.852094 | 0.006048 | 0.022247 |
| WEIGEL OXIDATIVE STRESS BY HNE AND H2O2                             | 39  | 0.50648  | 1.844822 | 0.001949 | 0.023823 |
| ZHANG BREAST CANCER PROGENITORS UP                                  | 399 | 0.526447 | 1.844558 | 0.009506 | 0.023816 |
| ZHAN VARIABLE EARLY DIFFERENTIATION GENES DN                        | 30  | 0.576495 | 1.843922 | 0.01222  | 0.023926 |
| MARIADASON RESPONSE TO BUTYRATE SULINDAC 4                          | 21  | 0.638055 | 1.840878 | <0.0001  | 0.024633 |
| BROWNE HCMV INFECTION 14HR UP                                       | 151 | 0.429471 | 1.8378   | <0.0001  | 0.025324 |
| CHIN BREAST CANCER COPY NUMBER UP                                   | 24  | 0.642377 | 1.837327 | 0.006036 | 0.02537  |
| CHANDRAN METASTASIS TOP50 UP                                        | 34  | 0.599966 | 1.835718 | 0.008529 | 0.025764 |
| AMIT EGF RESPONSE 480 MCF10A                                        | 40  | 0.549684 | 1.834165 | 0.004032 | 0.026162 |
| PID MYC PATHWAY                                                     | 25  | 0.58743  | 1.832561 | 0.002041 | 0.02647  |
| KOKKINAKIS METHIONINE DEPRIVATION 48HR DN                           | 64  | 0.468072 | 1.831878 | <0.0001  | 0.026574 |
| OUYANG PROSTATE CANCER MARKERS                                      | 19  | 0.598903 | 1.82692  | 0.003984 | 0.027808 |
| RHEIN ALL GLUCOCORTICOID THERAPY DN                                 | 349 | 0.52694  | 1.826612 | 0.013917 | 0.027803 |
| COLLER MYC TARGETS UP                                               | 25  | 0.688274 | 1.824542 | 0.00994  | 0.028272 |
| FERRANDO HOX11 NEIGHBORS                                            | 23  | 0.665388 | 1.824189 | 0.008097 | 0.028276 |
| MOREAUX B LYMPHOCYTE MATURATION BY TACI DN                          | 66  | 0.610888 | 1.823406 | 0.015444 | 0.028441 |
| REACTOME APC C CDC20 MEDIATED DEGRADATION OF MITOTIC PROTEINS       | 65  | 0.68184  | 1.822773 | 0.013944 | 0.028526 |
| YAO TEMPORAL RESPONSE TO PROGESTERONE CLUSTER 14                    | 134 | 0.533481 | 1.82163  | 0.014315 | 0.02878  |
| SHAFFER IRF4 TARGETS IN ACTIVATED B LYMPHOCYTE                      | 76  | 0.534984 | 1.817887 | 0.00996  | 0.029723 |
| QI HYPOXIA TARGETS OF HIF1A AND FOXA2                               | 36  | 0.562575 | 1.815728 | 0.012959 | 0.030264 |
| GRADE METASTASIS DN                                                 | 42  | 0.632338 | 1.81546  | 0.010101 | 0.030267 |
| ZHANG RESPONSE TO CANTHARIDIN DN                                    | 67  | 0.595862 | 1.811645 | 0.016194 | 0.031294 |
| BONOME OVARIAN CANCER POOR SURVIVAL DN                              | 20  | 0.607782 | 1.810324 | 0.008316 | 0.03162  |
| TURASHVILI BREAST DUCTAL CARCINOMA VS LOBULAR NORMAL UP             | 71  | 0.574818 | 1.808855 | 0.006012 | 0.031939 |
| LOCKWOOD AMPLIFIED IN LUNG CANCER                                   | 205 | 0.466003 | 1.807801 | 0.00998  | 0.032154 |
| GROSS HYPOXIA VIA HIF1A UP                                          | 75  | 0.488037 | 1.807693 | 0.009862 | 0.032112 |
| ZHANG RESPONSE TO IKK INHIBITOR AND TNF DN                          | 100 | 0.463692 | 1.807535 | <0.0001  | 0.032067 |
| ZHAN EARLY DIFFERENTIATION GENES DN                                 | 42  | 0.528242 | 1.806294 | 0.006036 | 0.032346 |
| GARY CD5 TARGETS DN                                                 | 414 | 0.503119 | 1.806287 | 0.009843 | 0.032267 |
| WANG RECURRENT LIVER CANCER UP                                      | 20  | 0.617381 | 1.805788 | 0.009671 | 0.032317 |

|                                                                                                                   |     |          |          |          |          |
|-------------------------------------------------------------------------------------------------------------------|-----|----------|----------|----------|----------|
| CONCANNON APOPTOSIS BY EPOXOMICIN DN                                                                              | 159 | 0.443199 | 1.805061 | 0.004008 | 0.032457 |
| REACTOME APC C CDH1 MEDIATED DEGRADATION OF CDC20 AND OTHER APC C CDH1 TARGETED PROTEINS IN LATE MITOSIS EARLY G1 | 64  | 0.678872 | 1.801255 | 0.006198 | 0.033611 |
| KENNY CTNNB1 TARGETS UP                                                                                           | 46  | 0.47911  | 1.798506 | 0.002083 | 0.034422 |
| HUANG GATA2 TARGETS DN                                                                                            | 67  | 0.456913 | 1.798502 | 0.005988 | 0.034336 |
| KATSANOUE ELAVL1 TARGETS DN                                                                                       | 141 | 0.411378 | 1.798093 | 0.002037 | 0.034376 |
| KORKOLA TERATOMA                                                                                                  | 39  | 0.522011 | 1.796968 | 0.005682 | 0.034607 |
| CAFFAREL RESPONSE TO THC 24HR 5 DN                                                                                | 55  | 0.564307 | 1.796131 | 0.011858 | 0.034799 |
| PRAMOONJAGO SOX4 TARGETS DN                                                                                       | 50  | 0.542804 | 1.795203 | 0.014286 | 0.035024 |
| BIOCARTA ATM PATHWAY                                                                                              | 19  | 0.607166 | 1.793747 | 0.00994  | 0.035413 |
| ACOSTA PROLIFERATION INDEPENDENT MYC TARGETS UP                                                                   | 75  | 0.484334 | 1.791232 | <0.0001  | 0.036201 |
| YANG BREAST CANCER ESR1 BULK DN                                                                                   | 22  | 0.589339 | 1.787586 | 0.004008 | 0.037347 |
| KAMMINGA SENESCENCE                                                                                               | 39  | 0.510462 | 1.785717 | 0.006073 | 0.037869 |
| HEIDENBLAD AMPLICON 8Q24 UP                                                                                       | 34  | 0.513789 | 1.784153 | 0.002033 | 0.038296 |
| DOANE RESPONSE TO ANDROGEN DN                                                                                     | 225 | 0.377645 | 1.782836 | <0.0001  | 0.038629 |
| XU RESPONSE TO TRETINOIN AND NSC682994 DN                                                                         | 15  | 0.749218 | 1.782828 | 0.007952 | 0.038536 |
| DAIRKEE CANCER PRONE RESPONSE BPA                                                                                 | 49  | 0.5149   | 1.78255  | 0.008163 | 0.038531 |
| YANG BREAST CANCER ESR1 LASER DN                                                                                  | 49  | 0.51411  | 1.782425 | 0.009766 | 0.038496 |
| GENTILE UV RESPONSE CLUSTER D5                                                                                    | 37  | 0.538302 | 1.781632 | 0.004049 | 0.038691 |
| DAIRKEE CANCER PRONE RESPONSE BPA E2                                                                              | 113 | 0.454566 | 1.780891 | 0.007937 | 0.038834 |
| AGUIRRE PANCREATIC CANCER COPY NUMBER UP                                                                          | 271 | 0.422701 | 1.780223 | 0.006036 | 0.03895  |
| REACTOME TELOMERE MAINTENANCE                                                                                     | 72  | 0.717516 | 1.779141 | 0.009862 | 0.039168 |
| KOINUMA COLON CANCER MSI UP                                                                                       | 16  | 0.680834 | 1.777525 | 0.008    | 0.039635 |
| MULLIGAN NTF3 SIGNALING VIA INSR AND IGF1R UP                                                                     | 23  | 0.613226 | 1.775819 | 0.013889 | 0.040098 |
| BORCZUK MALIGNANT MESOTHELIOMA UP                                                                                 | 291 | 0.534062 | 1.77549  | 0.018293 | 0.040138 |
| REACTOME NUCLEOTIDE EXCISION REPAIR                                                                               | 48  | 0.551427 | 1.775326 | 0.011858 | 0.040091 |
| CREIGHTON ENDOCRINE THERAPY RESISTANCE 1                                                                          | 483 | 0.388255 | 1.774407 | 0.001969 | 0.040293 |
| BIOCARTA P53 PATHWAY                                                                                              | 16  | 0.6195   | 1.772056 | 0.014085 | 0.041034 |
| BOYLAN MULTIPLE MYELOMA C UP                                                                                      | 44  | 0.489699 | 1.771714 | 0.002028 | 0.041066 |
| PEDERSEN METASTASIS BY ERBB2 ISOFORM 7                                                                            | 362 | 0.374922 | 1.769196 | 0.002016 | 0.041819 |
| SHIPP DLBCL CURED VS FATAL DN                                                                                     | 42  | 0.454515 | 1.768747 | 0.004211 | 0.041875 |
| BIOCARTA MTA3 PATHWAY                                                                                             | 19  | 0.601146 | 1.768595 | 0.006316 | 0.041814 |
| MARKS HDAC TARGETS DN                                                                                             | 15  | 0.650421 | 1.761765 | 0.005882 | 0.044272 |
| AUNG GASTRIC CANCER                                                                                               | 53  | 0.483991 | 1.761633 | 0.002004 | 0.044214 |
| JAIN NFkB SIGNALING                                                                                               | 71  | 0.450145 | 1.760884 | 0.005988 | 0.044359 |
| MARTINEZ RESPONSE TO TRABECTEDIN DN                                                                               | 265 | 0.470591 | 1.757903 | 0.009804 | 0.04541  |
| GARGALOVIC RESPONSE TO OXIDIZED PHOSPHOLIPIDS RED UP                                                              | 16  | 0.674322 | 1.757627 | 0.00969  | 0.045389 |
| BOYLAN MULTIPLE MYELOMA C D UP                                                                                    | 129 | 0.412027 | 1.750828 | 0.001949 | 0.04793  |
| MCBRYAN PUBERTAL BREAST 6 7WK DN                                                                                  | 76  | 0.432564 | 1.750524 | 0.003914 | 0.047915 |
| FIRESTEIN CTNNB1 PATHWAY                                                                                          | 32  | 0.522313 | 1.750299 | 0.010482 | 0.047874 |
| RASHI RESPONSE TO IONIZING RADIATION 4                                                                            | 57  | 0.428119 | 1.749433 | 0.006048 | 0.048117 |

|                                                            |     |          |          |          |          |
|------------------------------------------------------------|-----|----------|----------|----------|----------|
| COLLIS PRKDC SUBSTRATES                                    | 19  | 0.629469 | 1.748729 | 0.012048 | 0.048256 |
| SCHLOSSER MYC TARGETS AND SERUM RESPONSE UP                | 46  | 0.582833 | 1.748623 | 0.008282 | 0.048189 |
| ALFANO MYC TARGETS                                         | 230 | 0.387894 | 1.744518 | <0.0001  | 0.049764 |
| VANDESLUIS COMMD1 TARGETS GROUP 2 UP                       | 15  | 0.632077 | 1.743413 | 0.010482 | 0.050116 |
| DANG MYC TARGETS UP                                        | 138 | 0.558517 | 1.743166 | 0.022133 | 0.050106 |
| IIZUKA LIVER CANCER PROGRESSION G1 G2 DN                   | 24  | 0.606108 | 1.741579 | 0.014113 | 0.050655 |
| KRIGE AMINO ACID DEPRIVATION                               | 28  | 0.579764 | 1.741358 | 0.014028 | 0.050614 |
| HASLINGER B CLL WITH CHROMOSOME 12 TRISOMY                 | 22  | 0.625503 | 1.739008 | 0.010101 | 0.051462 |
| HEDENFALK BREAST CANCER HEREDITARY VS SPORADIC             | 46  | 0.510327 | 1.738706 | 0.016064 | 0.051486 |
| NEMETH INFLAMMATORY RESPONSE LPS DN                        | 32  | 0.514624 | 1.738703 | 0.009785 | 0.051375 |
| KEGG NUCLEOTIDE EXCISION REPAIR                            | 44  | 0.564056 | 1.738524 | 0.014315 | 0.05133  |
| REACTOME SHC1 EVENTS IN EGFR SIGNALING                     | 15  | 0.637525 | 1.736871 | 0.010267 | 0.051851 |
| REACTOME REGULATION OF KIT SIGNALING                       | 16  | 0.625786 | 1.73376  | 0.01581  | 0.052997 |
| KORKOLA YOLK SAC TUMOR UP                                  | 19  | 0.688392 | 1.730922 | 0.0125   | 0.054076 |
| CHICAS RB1 TARGETS LOW SERUM                               | 84  | 0.52153  | 1.729963 | 0.025341 | 0.054305 |
| REACTOME CDT1 ASSOCIATION WITH THE CDC6 ORC ORIGIN COMPLEX | 54  | 0.671975 | 1.728596 | 0.029821 | 0.054781 |
| SYED ESTRADIOL RESPONSE                                    | 19  | 0.552392 | 1.727593 | 0.001953 | 0.055147 |
| DORMOY ELAVL1 TARGETS                                      | 16  | 0.600263 | 1.726545 | 0.014    | 0.055477 |
| KIM TIAL1 TARGETS                                          | 31  | 0.529722 | 1.72588  | 0.016162 | 0.055626 |
| SCHLOSSER MYC TARGETS REPRESSED BY SERUM                   | 153 | 0.558718 | 1.724649 | 0.023669 | 0.056053 |
| BHAT ESR1 TARGETS NOT VIA AKT1 UP                          | 204 | 0.391497 | 1.722863 | 0.004292 | 0.056667 |
| WANG SMARCE1 TARGETS DN                                    | 348 | 0.413368 | 1.722439 | 0.009747 | 0.056741 |
| SCHLOSSER MYC AND SERUM RESPONSE SYNERGY                   | 31  | 0.621273 | 1.715185 | 0.016701 | 0.060069 |
| BIOCARTA VEGF PATHWAY                                      | 29  | 0.502447 | 1.710731 | 0.01     | 0.062121 |
| ELVIDGE HIF1A AND HIF2A TARGETS UP                         | 38  | 0.513299 | 1.710603 | 0.013672 | 0.062049 |
| GAZIN EPIGENETIC SILENCING BY KRAS                         | 24  | 0.536963 | 1.707667 | 0.02004  | 0.063299 |
| PID PRL SIGNALING EVENTS PATHWAY                           | 23  | 0.541884 | 1.707621 | 0.011696 | 0.063191 |
| DACOSTA UV RESPONSE VIA ERCC3 UP                           | 296 | 0.423989 | 1.706927 | 0.013333 | 0.063388 |
| MATSUDA NATURAL KILLER DIFFERENTIATION                     | 455 | 0.348894 | 1.704425 | <0.0001  | 0.064484 |
| TSENG IRS1 TARGETS UP                                      | 106 | 0.424004 | 1.701628 | 0.004141 | 0.065767 |
| SPIELMAN LYMPHOBLAST EUROPEAN VS ASIAN UP                  | 467 | 0.421584 | 1.701536 | 0.029046 | 0.065666 |
| CHEN HOXA5 TARGETS 9HR DN                                  | 36  | 0.502367 | 1.701035 | 0.023158 | 0.065765 |
| BENPORATH MYC TARGETS WITH EBOX                            | 219 | 0.391862 | 1.700512 | 0.008264 | 0.06587  |
| REACTOME MRNA SPLICING MINOR PATHWAY                       | 40  | 0.585225 | 1.698687 | 0.044922 | 0.066606 |
| WOOD EBV EBNA1 TARGETS UP                                  | 109 | 0.415678 | 1.696567 | 0.017621 | 0.067623 |
| WU HBX TARGETS 2 UP                                        | 22  | 0.534293 | 1.695216 | 0.017241 | 0.0682   |
| KEGG ONE CARBON POOL BY FOLATE                             | 17  | 0.616594 | 1.694383 | 0.014199 | 0.068486 |
| LIAO HAVE SOX4 BINDING SITES                               | 40  | 0.479374 | 1.691486 | 0.008065 | 0.069656 |
| SHETH LIVER CANCER VS TXNIP LOSS PAM1                      | 221 | 0.359227 | 1.688762 | 0.008097 | 0.07092  |
| VANHARANTA UTERINE FIBROID WITH 7Q DELETION UP             | 65  | 0.469301 | 1.688505 | 0.009311 | 0.070937 |
| WHITFIELD CELL CYCLE M G1                                  | 140 | 0.430909 | 1.685723 | 0.009881 | 0.07228  |

|                                                                   |     |          |          |          |          |
|-------------------------------------------------------------------|-----|----------|----------|----------|----------|
| ROESSLER LIVER CANCER METASTASIS UP                               | 102 | 0.380249 | 1.68114  | 0.006466 | 0.074694 |
| WEST ADRENOCORTICAL CARCINOMA VS ADENOMA UP                       | 18  | 0.563082 | 1.680375 | 0.015842 | 0.074945 |
| CUI GLUCOSE DEPRIVATION                                           | 58  | 0.474211 | 1.679451 | 0.021739 | 0.075299 |
| SANSOM APC TARGETS                                                | 192 | 0.361143 | 1.679052 | <0.0001  | 0.075357 |
| REACTOME APOPTOSIS                                                | 141 | 0.434313 | 1.679024 | 0.022    | 0.075222 |
| REACTOME G1 PHASE                                                 | 35  | 0.509178 | 1.67761  | 0.018293 | 0.075877 |
| VANTVEER BREAST CANCER BRCA1 UP                                   | 31  | 0.522712 | 1.676921 | 0.014644 | 0.076069 |
| LIU SOX4 TARGETS DN                                               | 293 | 0.368142 | 1.674423 | 0.008147 | 0.077422 |
| JACKSON DNMT1 TARGETS DN                                          | 24  | 0.580639 | 1.671261 | 0.030675 | 0.078966 |
| BROWNE HCMV INFECTION 48HR UP                                     | 174 | 0.366618 | 1.670898 | 0.007707 | 0.07903  |
| MMS MOUSE LYMPH HIGH 4HRS UP                                      | 31  | 0.577448 | 1.669948 | 0.026369 | 0.079362 |
| XU CREBBP TARGETS UP                                              | 24  | 0.522459 | 1.669384 | 0.021569 | 0.079532 |
| AMUNDSON GENOTOXIC SIGNATURE                                      | 99  | 0.378593 | 1.668514 | 0.006122 | 0.079889 |
| DEN INTERACT WITH LCA5                                            | 25  | 0.606244 | 1.667957 | 0.036437 | 0.080035 |
| HOFMANN MYELOYDYSPLASTIC SYNDROM RISK UP                          | 24  | 0.552774 | 1.667232 | 0.026971 | 0.080299 |
| KAPOSI LIVER CANCER MET UP                                        | 17  | 0.617205 | 1.66397  | 0.030864 | 0.081786 |
| PARK HSC VS MULTIPOTENT PROGENITORS DN                            | 18  | 0.578936 | 1.663548 | 0.024048 | 0.081896 |
| PODAR RESPONSE TO ADAPHOSTIN DN                                   | 18  | 0.588823 | 1.663177 | 0.034979 | 0.081988 |
| REACTOME ANTIGEN PROCESSING UBIQUITINATION PROTEASOME DEGRADATION | 192 | 0.431399 | 1.660313 | 0.021739 | 0.083498 |
| BURTON ADIPOGENESIS 2                                             | 72  | 0.434288 | 1.658349 | 0.02714  | 0.084485 |
| SIG REGULATION OF THE ACTIN CYTOSKELETON BY RHO GTPASES           | 34  | 0.51478  | 1.657486 | 0.026052 | 0.084828 |
| VERHAAK GLIOBLASTOMA PRONEURAL                                    | 167 | 0.454466 | 1.655961 | 0.016791 | 0.085439 |
| SHAFFER IRF4 TARGETS IN ACTIVATED DENDRITIC CELL                  | 61  | 0.468219 | 1.65402  | 0.030769 | 0.08641  |
| MACLACHLAN BRCA1 TARGETS UP                                       | 21  | 0.587358 | 1.653751 | 0.031579 | 0.086405 |
| STAMBOLSKY BOUND BY MUTATED TP53                                  | 17  | 0.559684 | 1.65369  | 0.019685 | 0.086266 |
| ZUCCHI METASTASIS UP                                              | 38  | 0.506389 | 1.651958 | 0.028056 | 0.087209 |
| REACTOME GLUCONEOGENESIS                                          | 29  | 0.553363 | 1.650653 | 0.030738 | 0.087935 |
| KEGG PYRIMIDINE METABOLISM                                        | 96  | 0.454016 | 1.646759 | 0.022044 | 0.090304 |
| REACTOME GLUCOSE METABOLISM                                       | 61  | 0.457947 | 1.645502 | 0.02454  | 0.090967 |
| STEIN ESRRA TARGETS RESPONSIVE TO ESTROGEN UP                     | 29  | 0.498494 | 1.645105 | 0.019763 | 0.09107  |
| GENTILE UV HIGH DOSE DN                                           | 300 | 0.393233 | 1.644563 | 0.01341  | 0.091225 |
| PURBEY TARGETS OF CTBP1 AND SATB1 UP                              | 76  | 0.411234 | 1.638322 | 0.014085 | 0.094873 |
| GAJATE RESPONSE TO TRABECTEDIN DN                                 | 18  | 0.567216 | 1.638186 | 0.02907  | 0.094792 |
| MOREAUX MULTIPLE MYELOMA BY TACI DN                               | 154 | 0.489631 | 1.637983 | 0.044747 | 0.094753 |
| CAFFAREL RESPONSE TO THC 24HR 5 UP                                | 30  | 0.563796 | 1.636167 | 0.035088 | 0.095771 |
| REACTOME P53 INDEPENDENT G1 S DNA DAMAGE CHECKPOINT               | 48  | 0.645389 | 1.635859 | 0.047228 | 0.095775 |
| LEE TARGETS OF PTCH1 AND SUFU UP                                  | 48  | 0.471272 | 1.63417  | 0.028807 | 0.096733 |
| LI LUNG CANCER                                                    | 41  | 0.489513 | 1.634072 | 0.034765 | 0.096644 |
| YIH RESPONSE TO ARSENITE C3                                       | 35  | 0.487537 | 1.633819 | 0.021442 | 0.096605 |
| HOFMANN MYELOYDYSPLASTIC SYNDROM LOW RISK DN                      | 30  | 0.534486 | 1.633768 | 0.036247 | 0.09646  |
| BACOLOD RESISTANCE TO ALKYLATING                                  | 57  | 0.436501 | 1.631495 | 0.017717 | 0.097409 |

|                                                    |     |          |          |          |          |
|----------------------------------------------------|-----|----------|----------|----------|----------|
| AGENTS DN                                          |     |          |          |          |          |
| REACTOME INTRINSIC PATHWAY FOR APOPTOSIS           | 29  | 0.506254 | 1.630883 | 0.02947  | 0.097658 |
| HOLLEMAN PREDNISOLONE RESISTANCE ALL UP            | 19  | 0.56937  | 1.629767 | 0.041916 | 0.09817  |
| OUELLET CULTURED OVARIAN CANCER INVASIVE VS LMP UP | 65  | 0.466339 | 1.623623 | 0.02863  | 0.102045 |
| FLOTHO PEDIATRIC ALL THERAPY RESPONSE DN           | 27  | 0.492507 | 1.623287 | 0.028902 | 0.102086 |
| HONMA DOCETAXEL RESISTANCE                         | 30  | 0.610885 | 1.622961 | 0.042596 | 0.102105 |
| KIM MYCL1 AMPLIFICATION TARGETS DN                 | 19  | 0.549036 | 1.621311 | 0.020484 | 0.102997 |
| KEGG BLADDER CANCER                                | 40  | 0.432286 | 1.620543 | 0.010661 | 0.103338 |
| FLECHNER BIOPSY KIDNEY TRANSPLANT OK VS DONOR DN   | 25  | 0.480215 | 1.620483 | 0.013861 | 0.103179 |
| DITTMER PTHLH TARGETS UP                           | 110 | 0.42746  | 1.619487 | 0.036885 | 0.103498 |
| KEGG BASAL TRANSCRIPTION FACTORS                   | 35  | 0.506228 | 1.618743 | 0.021318 | 0.103758 |
| REACTOME SHC MEDIATED SIGNALLING                   | 15  | 0.561212 | 1.614165 | 0.039683 | 0.106735 |
| SAKAI TUMOR INFILTRATING MONOCYTES DN              | 79  | 0.486758 | 1.613951 | 0.046512 | 0.106713 |
| JIANG VHL TARGETS                                  | 130 | 0.396838 | 1.613075 | 0.020704 | 0.107153 |
| YAGI AML RELAPSE PROGNOSIS                         | 34  | 0.481919 | 1.613002 | 0.026915 | 0.107021 |
| RIZ ERYTHROID DIFFERENTIATION HBZ                  | 40  | 0.468207 | 1.61249  | 0.02381  | 0.107183 |
| PID DNA PK PATHWAY                                 | 16  | 0.561255 | 1.611381 | 0.022133 | 0.107569 |
| KAN RESPONSE TO ARSENIC TRIOXIDE                   | 118 | 0.414642 | 1.611206 | 0.01581  | 0.107473 |
| DORN ADENOVIRUS INFECTION 12HR DN                  | 33  | 0.48512  | 1.610997 | 0.032129 | 0.107407 |
| ZEMBUTSU SENSITIVITY TO METHOTREXATE               | 16  | 0.542896 | 1.609612 | 0.030948 | 0.108235 |
| DORSAM HOXA9 TARGETS UP                            | 35  | 0.469132 | 1.608232 | 0.019157 | 0.108805 |
| KEGG UBIQUITIN MEDIATED PROTEOLYSIS                | 130 | 0.398562 | 1.608094 | 0.023669 | 0.108724 |
| DIRMEIER LMP1 RESPONSE LATE UP                     | 55  | 0.464157 | 1.607486 | 0.045064 | 0.10875  |
| PENG GLUCOSE DEPRIVATION DN                        | 163 | 0.382865 | 1.604813 | 0.016427 | 0.110463 |
| LIN APC TARGETS                                    | 75  | 0.45452  | 1.603297 | 0.049438 | 0.111148 |
| REACTOME METABOLISM OF CARBOHYDRATES               | 228 | 0.35001  | 1.602403 | 0.004141 | 0.111562 |
| BANDRES RESPONSE TO CARMUSTIN WITHOUT MGMT 48HR DN | 29  | 0.477178 | 1.598209 | 0.038618 | 0.11433  |
| KANNAN TP53 TARGETS DN                             | 21  | 0.518945 | 1.597191 | 0.031558 | 0.114901 |
| JACKSON DNMT1 TARGETS UP                           | 74  | 0.411704 | 1.596822 | 0.027944 | 0.114973 |
| PID ILK PATHWAY                                    | 45  | 0.46215  | 1.595919 | 0.044266 | 0.115256 |
| AMIT SERUM RESPONSE 480 MCF10A                     | 34  | 0.518867 | 1.594374 | 0.024691 | 0.115837 |
| DACOSTA UV RESPONSE VIA ERCC3 TTD UP               | 62  | 0.429759 | 1.593814 | 0.027311 | 0.116049 |
| KEGG P53 SIGNALING PATHWAY                         | 66  | 0.412606 | 1.586298 | 0.034483 | 0.121101 |
| GHO ATF5 TARGETS DN                                | 16  | 0.582184 | 1.585551 | 0.040773 | 0.121263 |
| REACTOME SHC RELATED EVENTS                        | 17  | 0.540824 | 1.585015 | 0.028112 | 0.121426 |
| REACTOME RNA POL II PRE TRANSCRIPTION EVENTS       | 51  | 0.488548 | 1.5836   | 0.043222 | 0.122093 |
| YAGI AML SURVIVAL                                  | 119 | 0.351863 | 1.582957 | 0.008264 | 0.122396 |
| YIH RESPONSE TO ARSENITE C1                        | 23  | 0.511724 | 1.582521 | 0.031936 | 0.12248  |
| YAO TEMPORAL RESPONSE TO PROGESTERONE CLUSTER 15   | 31  | 0.456327 | 1.579098 | 0.040161 | 0.124971 |
| RAY TUMORIGENESIS BY ERBB2 CDC25A UP               | 99  | 0.364849 | 1.576795 | 0.004184 | 0.126606 |
| CHEN LUNG CANCER SURVIVAL                          | 26  | 0.5199   | 1.576677 | 0.039501 | 0.126487 |

|                                                               |     |          |          |          |          |
|---------------------------------------------------------------|-----|----------|----------|----------|----------|
| ONDER CDH1 TARGETS 1 DN                                       | 163 | 0.419621 | 1.571548 | 0.030769 | 0.130425 |
| SMID BREAST CANCER RELAPSE IN BONE DN                         | 293 | 0.368597 | 1.569138 | 0.010288 | 0.132103 |
| SMID BREAST CANCER RELAPSE IN BRAIN UP                        | 39  | 0.475131 | 1.567573 | 0.035433 | 0.133129 |
| REACTOME CLASS I MHC MEDIATED ANTIGEN PROCESSING PRESENTATION | 229 | 0.393769 | 1.567127 | 0.043478 | 0.133252 |
| FARMER BREAST CANCER BASAL VS LULMINAL                        | 317 | 0.343699 | 1.56651  | 0.009785 | 0.133526 |
| LU TUMOR ANGIOGENESIS UP                                      | 25  | 0.510078 | 1.566007 | 0.032653 | 0.133714 |
| PID P53 REGULATION PATHWAY                                    | 57  | 0.423841 | 1.562963 | 0.048733 | 0.135978 |
| JI RESPONSE TO FSH DN                                         | 57  | 0.488766 | 1.560851 | 0.041502 | 0.137101 |
| LIN MELANOMA COPY NUMBER UP                                   | 67  | 0.437154 | 1.560371 | 0.044    | 0.137279 |
| REACTOME DESTABILIZATION OF MRNA BY KSRP                      | 17  | 0.543378 | 1.56019  | 0.036072 | 0.137214 |
| PID PI3KCI AKT PATHWAY                                        | 35  | 0.46228  | 1.559266 | 0.034836 | 0.137528 |
| JAZAG TGFB1 SIGNALING UP                                      | 104 | 0.358152 | 1.558575 | 0.01341  | 0.137582 |
| FOSTER KDM1A TARGETS DN                                       | 195 | 0.343706 | 1.55472  | 0.018109 | 0.140648 |
| OZEN MIR125B1 TARGETS                                         | 25  | 0.47698  | 1.554058 | 0.048733 | 0.141021 |
| NGUYEN NOTCH1 TARGETS DN                                      | 84  | 0.38837  | 1.552365 | 0.038462 | 0.142055 |
| WATANABE COLON CANCER MSI VS MSS UP                           | 27  | 0.478435 | 1.551096 | 0.041257 | 0.142611 |
| PID DELTA NP63 PATHWAY                                        | 45  | 0.439802 | 1.550394 | 0.039139 | 0.143011 |
| PID LKB1 PATHWAY                                              | 46  | 0.417719 | 1.549038 | 0.017167 | 0.143946 |
| BYSTRYKH HEMATOPOIESIS STEM CELL AND BRAIN QTL TRANS          | 175 | 0.324096 | 1.546719 | 0.008065 | 0.145441 |
| HATADA METHYLATED IN LUNG CANCER DN                           | 28  | 0.476138 | 1.544298 | 0.036511 | 0.147344 |
| HOFMANN CELL LYMPHOMA UP                                      | 46  | 0.428368 | 1.542343 | 0.049618 | 0.148056 |
| BIOCARTA CARM ER PATHWAY                                      | 35  | 0.447378 | 1.53739  | 0.042596 | 0.151881 |
| BIOCARTA TNFR1 PATHWAY                                        | 29  | 0.460219 | 1.535701 | 0.048096 | 0.153243 |
| AIYAR COBRA1 TARGETS DN                                       | 28  | 0.451191 | 1.534458 | 0.042857 | 0.154202 |
| SENESE HDAC3 TARGETS DN                                       | 481 | 0.317207 | 1.531563 | 0.008368 | 0.156398 |
| CEBALLOS TARGETS OF TP53 AND MYC DN                           | 37  | 0.426576 | 1.530657 | 0.045064 | 0.156978 |
| ZHU CMV 24 HR UP                                              | 93  | 0.418076 | 1.530502 | 0.032129 | 0.156857 |
| PID HDAC CLASSI PATHWAY                                       | 65  | 0.386848 | 1.526282 | 0.030426 | 0.160336 |
| HIRSCH CELLULAR TRANSFORMATION SIGNATURE DN                   | 95  | 0.366637 | 1.520931 | 0.019646 | 0.164539 |
| MUELLER COMMON TARGETS OF AML FUSIONS DN                      | 29  | 0.460486 | 1.520771 | 0.04829  | 0.164145 |
| SATO SILENCED BY METHYLATION IN PANCREATIC CANCER 2           | 44  | 0.414175 | 1.51848  | 0.043478 | 0.16584  |
| BROWNE HCMV INFECTION 8HR DN                                  | 44  | 0.428655 | 1.512252 | 0.031809 | 0.170622 |
| SUZUKI RESPONSE TO TSA AND DECITABINE 1B                      | 21  | 0.464547 | 1.508993 | 0.046875 | 0.173202 |
| ST FAS SIGNALING PATHWAY                                      | 63  | 0.373409 | 1.505988 | 0.034553 | 0.175949 |
| AMUNDSON RESPONSE TO ARSENITE                                 | 211 | 0.319293 | 1.505967 | 0.013619 | 0.175698 |
| IVANOVA HEMATOPOIESIS EARLY PROGENITOR                        | 489 | 0.325484 | 1.505455 | 0.031936 | 0.175643 |
| DEURIG T CELL PROLYMPHOCYTIC LEUKEMIA UP                      | 340 | 0.306213 | 1.502455 | 0.015748 | 0.177463 |
| REACTOME SIGNALLING TO RAS                                    | 27  | 0.462607 | 1.495756 | 0.047917 | 0.182348 |
| GRADE COLON VS RECTAL CANCER DN                               | 49  | 0.376338 | 1.495199 | 0.031847 | 0.182338 |
| KYNG WERNER SYNDROM AND NORMAL AGING UP                       | 87  | 0.357155 | 1.489897 | 0.016097 | 0.186848 |
| SIG PIP3 SIGNALING IN CARDIAC MYOCTES                         | 66  | 0.368876 | 1.489332 | 0.031189 | 0.186843 |

|                                                 |     |          |          |          |          |
|-------------------------------------------------|-----|----------|----------|----------|----------|
| HAHTOLA SEZARY SYNDROM UP                       | 92  | 0.38984  | 1.487074 | 0.032    | 0.188279 |
| DACOSTA UV RESPONSE VIA ERCC3 COMMON UP         | 70  | 0.380407 | 1.486032 | 0.04     | 0.188455 |
| BROWNE HCMV INFECTION 24HR UP                   | 139 | 0.324547 | 1.478919 | 0.019685 | 0.19425  |
| KEGG PANCREATIC CANCER                          | 69  | 0.374507 | 1.470288 | 0.048485 | 0.200665 |
| FIGUEROA AML METHYLATION CLUSTER 4 UP           | 97  | 0.324782 | 1.453892 | 0.031128 | 0.212344 |
| BAKKER FOXO3 TARGETS DN                         | 168 | 0.314701 | 1.44876  | 0.02907  | 0.216734 |
| HELLER HDAC TARGETS DN                          | 275 | 0.316792 | 1.445236 | 0.038388 | 0.219097 |
| FERNANDEZ BOUND BY MYC                          | 179 | 0.321616 | 1.431034 | 0.041237 | 0.232664 |
| PANGAS TUMOR SUPPRESSION BY SMAD1 AND SMAD5 DN  | 142 | 0.318249 | 1.427508 | 0.038536 | 0.233941 |
| CHENG IMPRINTED BY ESTRADIOL                    | 100 | 0.33281  | 1.427413 | 0.038306 | 0.23342  |
| BROWNE HCMV INFECTION 20HR UP                   | 230 | 0.30354  | 1.426112 | 0.036822 | 0.234641 |
| PENG LEUCINE DEPRIVATION UP                     | 134 | 0.315465 | 1.424267 | 0.046278 | 0.236144 |
| LEE AGING NEOCORTEX DN                          | 75  | 0.349563 | 1.424074 | 0.031311 | 0.235706 |
| AMUNDSON POOR SURVIVAL AFTER GAMMA RADIATION 2G | 161 | 0.307236 | 1.416233 | 0.046843 | 0.241085 |
| BROWNE HCMV INFECTION 10HR UP                   | 95  | 0.333986 | 1.407838 | 0.038835 | 0.246995 |
| BRUINS UVC RESPONSE EARLY LATE                  | 292 | 0.295554 | 1.405713 | 0.037549 | 0.248156 |

ES, enrichment score; NES, normalized enrichment score; FDR, false discovery rate; GSEA, gene set enrichment analysis; KIF, kinesin.



**Table SVI. GSEA results of c5 reference gene set of high *KIF20A* expression group.**

| Name                                                               | Size | ES       | NES      | NOM<br>P-value | FDR<br>q-value |
|--------------------------------------------------------------------|------|----------|----------|----------------|----------------|
| GO CELL DIVISION                                                   | 423  | 0.660811 | 2.630137 | <0.0001        | <0.0001        |
| GO ORGANELLE FISSION                                               | 449  | 0.680021 | 2.60867  | <0.0001        | <0.0001        |
| GO MITOTIC SISTER CHROMATID SEGREGATION                            | 88   | 0.827501 | 2.605532 | <0.0001        | <0.0001        |
| GO CELL CYCLE PHASE TRANSITION                                     | 248  | 0.704605 | 2.593259 | <0.0001        | <0.0001        |
| GO CHROMOSOME SEGREGATION                                          | 247  | 0.755327 | 2.592687 | <0.0001        | <0.0001        |
| GO MITOTIC NUCLEAR DIVISION                                        | 337  | 0.709956 | 2.585621 | <0.0001        | <0.0001        |
| GO NUCLEAR CHROMOSOME SEGREGATION                                  | 204  | 0.777326 | 2.581268 | <0.0001        | <0.0001        |
| GO DNA RECOMBINATION                                               | 189  | 0.723569 | 2.576992 | <0.0001        | <0.0001        |
| GO SPINDLE                                                         | 267  | 0.639977 | 2.567176 | <0.0001        | <0.0001        |
| GO CONDENSED CHROMOSOME                                            | 169  | 0.775263 | 2.553432 | <0.0001        | <0.0001        |
| GO SISTER CHROMATID SEGREGATION                                    | 163  | 0.801726 | 2.524628 | <0.0001        | <0.0001        |
| GO CELL CYCLE CHECKPOINT                                           | 179  | 0.658174 | 2.518347 | <0.0001        | <0.0001        |
| GO DNA REPLICATION                                                 | 192  | 0.733677 | 2.518005 | <0.0001        | <0.0001        |
| GO SPINDLE POLE                                                    | 113  | 0.689469 | 2.504815 | <0.0001        | <0.0001        |
| GO REGULATION OF MICROTUBULE<br>POLYMERIZATION OR DEPOLYMERIZATION | 164  | 0.636036 | 2.504704 | <0.0001        | <0.0001        |
| GO MITOTIC SPINDLE                                                 | 50   | 0.74303  | 2.503505 | <0.0001        | <0.0001        |
| GO CHROMOSOME CENTROMERIC REGION                                   | 153  | 0.776734 | 2.501119 | <0.0001        | <0.0001        |
| GO SPINDLE MICROTUBULE                                             | 56   | 0.761647 | 2.500701 | <0.0001        | <0.0001        |
| GO REGULATION OF MITOTIC CELL CYCLE                                | 444  | 0.56376  | 2.499029 | <0.0001        | <0.0001        |
| GO MITOTIC CELL CYCLE CHECKPOINT                                   | 129  | 0.643888 | 2.496368 | <0.0001        | <0.0001        |
| GO CHROMOSOMAL REGION                                              | 297  | 0.705116 | 2.484785 | <0.0001        | <0.0001        |
| GO DNA REPAIR                                                      | 433  | 0.629087 | 2.482185 | <0.0001        | <0.0001        |
| GO CELL CYCLE G1 S PHASE TRANSITION                                | 108  | 0.753415 | 2.476977 | <0.0001        | <0.0001        |
| GO REGULATION OF MICROTUBULE BASED<br>PROCESS                      | 226  | 0.606974 | 2.474004 | <0.0001        | <0.0001        |
| GO SPINDLE MIDZONE                                                 | 25   | 0.852275 | 2.468379 | <0.0001        | <0.0001        |
| GO MITOTIC SPINDLE ORGANIZATION                                    | 64   | 0.748675 | 2.465732 | <0.0001        | <0.0001        |
| GO MIDBODY                                                         | 121  | 0.617822 | 2.465511 | <0.0001        | <0.0001        |
| GO CHROMOSOME LOCALIZATION                                         | 56   | 0.750433 | 2.454397 | <0.0001        | <0.0001        |
| GO REGULATION OF CELL CYCLE PHASE<br>TRANSITION                    | 308  | 0.581206 | 2.45415  | <0.0001        | <0.0001        |
| GO CYTOKINESIS                                                     | 80   | 0.640975 | 2.453465 | <0.0001        | <0.0001        |
| GO REGULATION OF NUCLEAR DIVISION                                  | 153  | 0.61796  | 2.449809 | <0.0001        | <0.0001        |
| GO REGULATION OF DNA REPLICATION                                   | 152  | 0.615301 | 2.448988 | <0.0001        | <0.0001        |
| GO REGULATION OF DNA DEPENDENT DNA<br>REPLICATION                  | 39   | 0.821107 | 2.443355 | <0.0001        | <0.0001        |
| GO CONDENSED CHROMOSOME CENTROMERIC<br>REGION                      | 83   | 0.846639 | 2.441495 | <0.0001        | <0.0001        |
| GO CELL CYCLE G2 M PHASE TRANSITION                                | 134  | 0.652451 | 2.438719 | <0.0001        | <0.0001        |
| GO CONDENSED NUCLEAR CHROMOSOME                                    | 74   | 0.736769 | 2.437688 | <0.0001        | <0.0001        |
| GO MEIOTIC CELL CYCLE                                              | 162  | 0.652896 | 2.434834 | <0.0001        | <0.0001        |
| GO NEGATIVE REGULATION OF PROTEIN<br>COMPLEX DISASSEMBLY           | 156  | 0.601239 | 2.434196 | <0.0001        | <0.0001        |
| GO DNA INTEGRITY CHECKPOINT                                        | 136  | 0.620797 | 2.429499 | <0.0001        | <0.0001        |

|                                                            |     |          |          |         |          |
|------------------------------------------------------------|-----|----------|----------|---------|----------|
| GO POSITIVE REGULATION OF DNA METABOLIC PROCESS            | 174 | 0.551989 | 2.428966 | <0.0001 | <0.0001  |
| GO DNA BIOSYNTHETIC PROCESS                                | 108 | 0.686832 | 2.428841 | <0.0001 | <0.0001  |
| GO REGULATION OF DNA METABOLIC PROCESS                     | 318 | 0.553886 | 2.428423 | <0.0001 | <0.0001  |
| GO RECOMBINATIONAL REPAIR                                  | 70  | 0.743982 | 2.416813 | <0.0001 | <0.0001  |
| GO KINETOCHORE                                             | 103 | 0.788082 | 2.407898 | <0.0001 | <0.0001  |
| GO REGULATION OF CHROMOSOME SEGREGATION                    | 77  | 0.734029 | 2.406588 | <0.0001 | <0.0001  |
| GO MEIOTIC CELL CYCLE PROCESS                              | 130 | 0.660201 | 2.405313 | <0.0001 | <0.0001  |
| GO NEGATIVE REGULATION OF CHROMOSOME ORGANIZATION          | 93  | 0.659019 | 2.404744 | <0.0001 | <0.0001  |
| GO SISTER CHROMATID COHESION                               | 100 | 0.806746 | 2.396744 | <0.0001 | <0.0001  |
| GO DNA DEPENDENT DNA REPLICATION                           | 90  | 0.791862 | 2.385005 | <0.0001 | <0.0001  |
| GO POSITIVE REGULATION OF DNA BIOSYNTHETIC PROCESS         | 57  | 0.638467 | 2.380365 | <0.0001 | <0.0001  |
| GO NEGATIVE REGULATION OF CELL CYCLE PROCESS               | 199 | 0.55008  | 2.37442  | <0.0001 | <0.0001  |
| GO NEGATIVE REGULATION OF MITOTIC CELL CYCLE               | 184 | 0.548421 | 2.370377 | <0.0001 | <0.0001  |
| GO NEGATIVE REGULATION OF ORGANELLE ORGANIZATION           | 361 | 0.519748 | 2.362648 | <0.0001 | <0.0001  |
| GO REGULATION OF CELL CYCLE G2 M PHASE TRANSITION          | 57  | 0.649513 | 2.362177 | <0.0001 | <0.0001  |
| GO DNA SYNTHESIS INVOLVED IN DNA REPAIR                    | 67  | 0.73598  | 2.356527 | <0.0001 | 1.34E-05 |
| GO SPINDLE ASSEMBLY                                        | 67  | 0.673932 | 2.350369 | <0.0001 | 1.31E-05 |
| GO DOUBLE STRAND BREAK REPAIR                              | 151 | 0.662951 | 2.344767 | <0.0001 | 2.58E-05 |
| GO RNA LOCALIZATION                                        | 173 | 0.611908 | 2.34285  | <0.0001 | 2.53E-05 |
| GO REGULATION OF CELL DIVISION                             | 250 | 0.542589 | 2.337131 | <0.0001 | 6.05E-05 |
| GO REGULATION OF SISTER CHROMATID SEGREGATION              | 61  | 0.696144 | 2.336224 | <0.0001 | 7.83E-05 |
| GO REGULATION OF SIGNAL TRANSDUCTION BY P53 CLASS MEDIATOR | 156 | 0.585316 | 2.332175 | <0.0001 | 7.70E-05 |
| GO MITOTIC DNA INTEGRITY CHECKPOINT                        | 93  | 0.588111 | 2.330566 | <0.0001 | 7.58E-05 |
| GO PROTEIN SUMOYLATION                                     | 112 | 0.658692 | 2.330413 | <0.0001 | 7.46E-05 |
| GO METAPHASE PLATE CONGRESSION                             | 41  | 0.771644 | 2.328486 | <0.0001 | 7.34E-05 |
| GO REPLICATION FORK                                        | 62  | 0.778807 | 2.32353  | <0.0001 | 7.23E-05 |
| GO POSITIVE REGULATION OF DNA REPLICATION                  | 84  | 0.576722 | 2.314016 | <0.0001 | 7.12E-05 |
| GO DNA STRAND ELONGATION                                   | 29  | 0.905697 | 2.312734 | <0.0001 | 7.01E-05 |
| GO NUCLEAR PERIPHERY                                       | 118 | 0.60151  | 2.312341 | <0.0001 | 6.91E-05 |
| GO NEGATIVE REGULATION OF CELL CYCLE PHASE TRANSITION      | 137 | 0.547533 | 2.308296 | <0.0001 | 8.65E-05 |
| GO MEIOTIC CHROMOSOME SEGREGATION                          | 49  | 0.695876 | 2.307551 | <0.0001 | 8.52E-05 |
| GO DNA GEOMETRIC CHANGE                                    | 77  | 0.702514 | 2.305371 | <0.0001 | 8.40E-05 |
| GO SINGLE STRANDED DNA BINDING                             | 78  | 0.674893 | 2.30118  | <0.0001 | 8.29E-05 |
| GO NUCLEAR EXPORT                                          | 139 | 0.618033 | 2.29859  | <0.0001 | 8.17E-05 |
| GO MEIOSIS I                                               | 73  | 0.666714 | 2.298146 | <0.0001 | 8.06E-05 |
| GO NUCLEAR TRANSPORT                                       | 341 | 0.500081 | 2.294754 | <0.0001 | 9.53E-05 |
| GO REGULATION OF PROTEIN COMPLEX                           | 198 | 0.551694 | 2.293829 | <0.0001 | 9.40E-05 |

|                                                                |     |          |          |         |          |
|----------------------------------------------------------------|-----|----------|----------|---------|----------|
| DISASSEMBLY                                                    |     |          |          |         |          |
| GO NEGATIVE REGULATION OF CYTOSKELETON ORGANIZATION            | 205 | 0.525655 | 2.293532 | <0.0001 | 1.03E-04 |
| GO NUCLEAR CHROMOSOME                                          | 488 | 0.582026 | 2.289451 | <0.0001 | 1.12E-04 |
| GO CYTOSKELETON DEPENDENT CYTOKINESIS                          | 38  | 0.697478 | 2.288011 | <0.0001 | 1.11E-04 |
| GO DNA STRAND ELONGATION INVOLVED IN DNA REPLICATION           | 25  | 0.923112 | 2.286211 | <0.0001 | 1.09E-04 |
| GO RIBONUCLEOPROTEIN COMPLEX LOCALIZATION                      | 112 | 0.644312 | 2.278178 | <0.0001 | 1.28E-04 |
| GO MULTI ORGANISM LOCALIZATION                                 | 65  | 0.662595 | 2.276624 | <0.0001 | 1.26E-04 |
| GO NUCLEAR IMPORT                                              | 126 | 0.553295 | 2.272512 | <0.0001 | 1.24E-04 |
| GO POSITIVE REGULATION OF MITOTIC CELL CYCLE                   | 118 | 0.586146 | 2.271782 | <0.0001 | 1.32E-04 |
| GO NUCLEAR ENVELOPE ORGANIZATION                               | 75  | 0.613021 | 2.27102  | <0.0001 | 1.30E-04 |
| GO MITOTIC RECOMBINATION                                       | 41  | 0.84238  | 2.270988 | <0.0001 | 1.29E-04 |
| GO POSITIVE REGULATION OF TELOMERE MAINTENANCE                 | 44  | 0.650351 | 2.270476 | <0.0001 | 1.27E-04 |
| GO MITOTIC SPINDLE ASSEMBLY                                    | 39  | 0.700745 | 2.270003 | <0.0001 | 1.26E-04 |
| GO SOMATIC DIVERSIFICATION OF IMMUNE RECEPTORS                 | 37  | 0.679425 | 2.268409 | <0.0001 | 1.37E-04 |
| GO CHROMOSOME SEPARATION                                       | 16  | 0.869264 | 2.268388 | <0.0001 | 1.35E-04 |
| GO POSITIVE REGULATION OF CELL CYCLE PROCESS                   | 227 | 0.536314 | 2.266594 | <0.0001 | 1.34E-04 |
| GO BLASTOCYST GROWTH                                           | 15  | 0.841951 | 2.266136 | <0.0001 | 1.32E-04 |
| GO REGULATION OF CHROMOSOME ORGANIZATION                       | 263 | 0.538688 | 2.265021 | <0.0001 | 1.31E-04 |
| GO DNA DEPENDENT ATPASE ACTIVITY                               | 76  | 0.717595 | 2.263071 | <0.0001 | 1.39E-04 |
| GO REGULATION OF TELOMERE MAINTENANCE                          | 64  | 0.628213 | 2.262557 | <0.0001 | 1.38E-04 |
| GO SOMATIC DIVERSIFICATION OF IMMUNOGLOBULINS                  | 26  | 0.709056 | 2.260429 | <0.0001 | 1.36E-04 |
| GO POSITIVE REGULATION OF CELL CYCLE PHASE TRANSITION          | 66  | 0.620311 | 2.260365 | <0.0001 | 1.35E-04 |
| GO REGULATION OF TELOMERE MAINTENANCE VIA TELOMERE LENGTHENING | 49  | 0.654718 | 2.256848 | <0.0001 | 1.47E-04 |
| GO REGULATION OF RESPONSE TO DNA DAMAGE STIMULUS               | 134 | 0.532934 | 2.254433 | <0.0001 | 1.77E-04 |
| GO REGULATION OF DNA BIOSYNTHETIC PROCESS                      | 90  | 0.553583 | 2.252117 | <0.0001 | 1.97E-04 |
| GO HETEROCHROMATIN                                             | 65  | 0.625897 | 2.249072 | <0.0001 | 2.18E-04 |
| GO DNA DAMAGE RESPONSE DETECTION OF DNA DAMAGE                 | 36  | 0.782489 | 2.245896 | <0.0001 | 2.30E-04 |
| GO ATPASE ACTIVITY                                             | 412 | 0.502777 | 2.245846 | <0.0001 | 2.28E-04 |
| GO REGULATION OF DNA REPAIR                                    | 68  | 0.623786 | 2.245409 | <0.0001 | 2.26E-04 |
| GO METHYLTRANSFERASE COMPLEX                                   | 83  | 0.655215 | 2.245314 | <0.0001 | 2.24E-04 |
| GO SIGNAL TRANSDUCTION IN RESPONSE TO DNA DAMAGE               | 91  | 0.576429 | 2.245174 | <0.0001 | 2.29E-04 |
| GO POSITIVE REGULATION OF CELL CYCLE                           | 308 | 0.494018 | 2.240261 | <0.0001 | 2.35E-04 |
| GO REGULATION OF RNA STABILITY                                 | 135 | 0.585796 | 2.239057 | <0.0001 | 2.40E-04 |
| GO SNRNA METABOLIC PROCESS                                     | 74  | 0.65691  | 2.238053 | <0.0001 | 2.38E-04 |

|                                                                                                   |     |          |          |         |          |
|---------------------------------------------------------------------------------------------------|-----|----------|----------|---------|----------|
| GO POSTREPLICATION REPAIR                                                                         | 48  | 0.680209 | 2.235532 | <0.0001 | 2.36E-04 |
| GO NUCLEUS ORGANIZATION                                                                           | 124 | 0.549594 | 2.234064 | <0.0001 | 2.34E-04 |
| GO SOMATIC CELL DNA RECOMBINATION                                                                 | 31  | 0.70252  | 2.228734 | <0.0001 | 2.44E-04 |
| GO POSITIVE REGULATION OF CHROMOSOME SEGREGATION                                                  | 23  | 0.775953 | 2.228108 | <0.0001 | 2.41E-04 |
| GO REGULATION OF DOUBLE STRAND BREAK REPAIR                                                       | 33  | 0.684693 | 2.224732 | <0.0001 | 2.39E-04 |
| GO CHROMOSOME CONDENSATION                                                                        | 26  | 0.808006 | 2.223898 | <0.0001 | 2.37E-04 |
| GO DNA CONFORMATION CHANGE                                                                        | 243 | 0.655499 | 2.222279 | <0.0001 | 2.35E-04 |
| GO POSITIVE REGULATION OF PROTEIN MODIFICATION BY SMALL PROTEIN CONJUGATION OR REMOVAL            | 185 | 0.555419 | 2.220613 | <0.0001 | 2.46E-04 |
| GO CHROMATIN REMODELING                                                                           | 139 | 0.601242 | 2.217792 | <0.0001 | 2.63E-04 |
| GO NEGATIVE REGULATION OF PROTEIN MODIFICATION BY SMALL PROTEIN CONJUGATION OR REMOVAL            | 134 | 0.619873 | 2.214668 | <0.0001 | 2.68E-04 |
| GO REGULATION OF CELLULAR RESPONSE TO HEAT                                                        | 72  | 0.645582 | 2.214477 | <0.0001 | 2.66E-04 |
| GO NEGATIVE REGULATION OF CELL CYCLE                                                              | 404 | 0.449473 | 2.211326 | <0.0001 | 2.89E-04 |
| GO HEAT SHOCK PROTEIN BINDING                                                                     | 86  | 0.551754 | 2.211092 | <0.0001 | 2.93E-04 |
| GO SOMATIC RECOMBINATION OF IMMUNOGLOBULIN GENE SEGMENTS                                          | 21  | 0.738018 | 2.210279 | <0.0001 | 2.98E-04 |
| GO MICROTUBULE CYTOSKELETON ORGANIZATION                                                          | 314 | 0.536841 | 2.209822 | <0.0001 | 2.95E-04 |
| GO REGULATION OF TRANSCRIPTION INVOLVED IN G1 S TRANSITION OF MITOTIC CELL CYCLE                  | 25  | 0.843398 | 2.209002 | <0.0001 | 2.93E-04 |
| GO CATALYTIC STEP 2 SPLICEOSOME                                                                   | 84  | 0.670652 | 2.206736 | <0.0001 | 2.96E-04 |
| GO REGULATION OF CELLULAR PROTEIN CATABOLIC PROCESS                                               | 262 | 0.501767 | 2.204877 | <0.0001 | 2.94E-04 |
| GO G2 DNA DAMAGE CHECKPOINT                                                                       | 31  | 0.691886 | 2.201896 | <0.0001 | 3.11E-04 |
| GO REGULATION OF PROTEIN UBIQUITINATION INVOLVED IN UBIQUITIN DEPENDENT PROTEIN CATABOLIC PROCESS | 101 | 0.652653 | 2.200525 | <0.0001 | 3.33E-04 |
| GO RECIPROCAL DNA RECOMBINATION                                                                   | 34  | 0.715683 | 2.199213 | <0.0001 | 3.30E-04 |
| GO NEGATIVE REGULATION OF DNA REPLICATION                                                         | 50  | 0.61944  | 2.197801 | <0.0001 | 3.28E-04 |
| GO NUCLEAR PORE                                                                                   | 73  | 0.651928 | 2.197411 | <0.0001 | 3.30E-04 |
| GO RNA SPLICING VIA TRANSESTERIFICATION REACTIONS                                                 | 259 | 0.601223 | 2.196343 | <0.0001 | 3.28E-04 |
| GO NEGATIVE REGULATION OF CELL DIVISION                                                           | 56  | 0.644598 | 2.194553 | <0.0001 | 3.41E-04 |
| GO RNA SPLICING                                                                                   | 347 | 0.576644 | 2.194118 | <0.0001 | 3.39E-04 |
| GO REGULATION OF PROTEASOMAL UBIQUITIN DEPENDENT PROTEIN CATABOLIC PROCESS                        | 141 | 0.51394  | 2.193323 | <0.0001 | 3.42E-04 |
| GO PROTEIN LOCALIZATION TO CHROMOSOME                                                             | 37  | 0.712133 | 2.192314 | <0.0001 | 3.44E-04 |
| GO POSITIVE REGULATION OF TELOMERE MAINTENANCE VIA TELOMERE LENGTHENING                           | 32  | 0.677586 | 2.191353 | <0.0001 | 3.56E-04 |
| GO MITOTIC CYTOKINESIS                                                                            | 31  | 0.699218 | 2.189471 | <0.0001 | 3.61E-04 |
| GO DNA REPLICATION INDEPENDENT NUCLEOSOME ORGANIZATION                                            | 47  | 0.793965 | 2.189197 | <0.0001 | 3.58E-04 |

|                                                                               |     |          |          |         |          |
|-------------------------------------------------------------------------------|-----|----------|----------|---------|----------|
| GO MEMBRANE DISASSEMBLY                                                       | 44  | 0.704564 | 2.188619 | <0.0001 | 3.56E-04 |
| GO REGULATION OF PROTEIN MODIFICATION BY SMALL PROTEIN CONJUGATION OR REMOVAL | 266 | 0.5109   | 2.183276 | <0.0001 | 3.66E-04 |
| GO DNA HELICASE ACTIVITY                                                      | 50  | 0.754049 | 2.180905 | <0.0001 | 3.76E-04 |
| GO POSITIVE REGULATION OF CHROMOSOME ORGANIZATION                             | 141 | 0.524285 | 2.17459  | <0.0001 | 3.99E-04 |
| GO MISMATCH REPAIR                                                            | 26  | 0.742196 | 2.174211 | <0.0001 | 3.96E-04 |
| GO HISTONE METHYLTRANSFERASE COMPLEX                                          | 64  | 0.628203 | 2.173017 | <0.0001 | 3.93E-04 |
| GO RESPONSE TO IONIZING RADIATION                                             | 137 | 0.529132 | 2.170958 | <0.0001 | 4.20E-04 |
| GO DNA DIRECTED DNA POLYMERASE ACTIVITY                                       | 26  | 0.684234 | 2.170379 | <0.0001 | 4.17E-04 |
| GO RAN GTPASE BINDING                                                         | 31  | 0.725659 | 2.168248 | <0.0001 | 4.50E-04 |
| GO NUCLEAR REPLICATION FORK                                                   | 39  | 0.730183 | 2.168062 | <0.0001 | 4.47E-04 |
| GO INTERSTRAND CROSS LINK REPAIR                                              | 38  | 0.684814 | 2.165138 | <0.0001 | 4.79E-04 |
| GO DNA POLYMERASE ACTIVITY                                                    | 33  | 0.65677  | 2.164661 | <0.0001 | 4.81E-04 |
| GO EXONUCLEASE ACTIVITY                                                       | 70  | 0.581509 | 2.163279 | <0.0001 | 4.91E-04 |
| GO NCRNA TRANSCRIPTION                                                        | 80  | 0.624406 | 2.162111 | <0.0001 | 4.98E-04 |
| GO CENTROSOME                                                                 | 457 | 0.490232 | 2.161983 | <0.0001 | 4.95E-04 |
| GO REGULATION OF LIGASE ACTIVITY                                              | 126 | 0.623796 | 2.160618 | <0.0001 | 5.06E-04 |
| GO SPLICEOSOMAL COMPLEX                                                       | 162 | 0.605047 | 2.159803 | <0.0001 | 5.07E-04 |
| GO STRAND DISPLACEMENT                                                        | 25  | 0.829354 | 2.15841  | <0.0001 | 5.14E-04 |
| GO NUCLEOBASE CONTAINING COMPOUND TRANSPORT                                   | 187 | 0.5325   | 2.156588 | <0.0001 | 5.11E-04 |
| GO NUCLEAR HETEROCHROMATIN                                                    | 31  | 0.69716  | 2.155668 | <0.0001 | 5.15E-04 |
| GO HISTONE PHOSPHORYLATION                                                    | 24  | 0.725683 | 2.15392  | <0.0001 | 5.20E-04 |
| GO NEGATIVE REGULATION OF NUCLEAR DIVISION                                    | 42  | 0.67103  | 2.150547 | <0.0001 | 5.72E-04 |
| GO CHROMOSOME TELOMERIC REGION                                                | 150 | 0.619044 | 2.15001  | <0.0001 | 5.73E-04 |
| GO HELICASE ACTIVITY                                                          | 148 | 0.631913 | 2.149751 | <0.0001 | 5.85E-04 |
| GO SNRNA PROCESSING                                                           | 20  | 0.772736 | 2.149612 | <0.0001 | 5.82E-04 |
| GO HISTONE KINASE ACTIVITY                                                    | 18  | 0.805996 | 2.149449 | <0.0001 | 5.78E-04 |
| GO EUCHROMATIN                                                                | 30  | 0.679637 | 2.147882 | <0.0001 | 6.01E-04 |
| GO NUCLEAR MATRIX                                                             | 95  | 0.554528 | 2.14748  | <0.0001 | 6.03E-04 |
| GO CENTROSOME CYCLE                                                           | 44  | 0.67298  | 2.146653 | <0.0001 | 6.10E-04 |
| GO NEGATIVE REGULATION OF MITOTIC NUCLEAR DIVISION                            | 32  | 0.705531 | 2.145708 | <0.0001 | 6.16E-04 |
| GO MRNA PROCESSING                                                            | 405 | 0.541885 | 2.145683 | <0.0001 | 6.13E-04 |
| GO POSITIVE REGULATION OF LIGASE ACTIVITY                                     | 106 | 0.653795 | 2.143097 | <0.0001 | 6.47E-04 |
| GO TERMINATION OF RNA POLYMERASE II TRANSCRIPTION                             | 61  | 0.650438 | 2.1428   | <0.0001 | 6.44E-04 |
| GO TELOMERE MAINTENANCE VIA RECOMBINATION                                     | 32  | 0.840974 | 2.14104  | <0.0001 | 6.57E-04 |
| GO RNA 3 END PROCESSING                                                       | 96  | 0.62139  | 2.139404 | <0.0001 | 6.72E-04 |
| GO CELLULAR RESPONSE TO IONIZING RADIATION                                    | 50  | 0.575638 | 2.138971 | <0.0001 | 6.69E-04 |
| GO FEMALE MEIOTIC DIVISION                                                    | 22  | 0.716946 | 2.137508 | <0.0001 | 6.94E-04 |
| GO DNA REPLICATION INITIATION                                                 | 29  | 0.875282 | 2.137183 | <0.0001 | 6.90E-04 |
| GO ANAPHASE PROMOTING COMPLEX                                                 | 75  | 0.769971 | 2.137161 | <0.0001 | 6.86E-04 |

|                                                                                     |     |          |          |         |          |
|-------------------------------------------------------------------------------------|-----|----------|----------|---------|----------|
| DEPENDENT CATABOLIC PROCESS                                                         |     |          |          |         |          |
| GO BASE EXCISION REPAIR                                                             | 39  | 0.657567 | 2.137023 | <0.0001 | 6.82E-04 |
| GO NEGATIVE REGULATION OF CHROMOSOME SEGREGATION                                    | 25  | 0.774654 | 2.136937 | <0.0001 | 6.85E-04 |
| GO REGULATION OF CENTROSOME CYCLE                                                   | 38  | 0.696025 | 2.136375 | <0.0001 | 6.91E-04 |
| GO POSITIVE REGULATION OF MITOTIC NUCLEAR DIVISION                                  | 46  | 0.611603 | 2.135852 | <0.0001 | 6.93E-04 |
| GO DNA DEPENDENT DNA REPLICATION MAINTENANCE OF FIDELITY                            | 19  | 0.792324 | 2.134392 | <0.0001 | 7.33E-04 |
| GO REGULATION OF PROTEASOMAL PROTEIN CATABOLIC PROCESS                              | 173 | 0.482434 | 2.133965 | <0.0001 | 7.29E-04 |
| GO PROTEIN POLYUBIQUITINATION                                                       | 234 | 0.498647 | 2.133929 | <0.0001 | 7.25E-04 |
| GO POSITIVE REGULATION OF CELLULAR PROTEIN CATABOLIC PROCESS                        | 185 | 0.513657 | 2.125878 | <0.0001 | 8.35E-04 |
| GO MICROTUBULE BINDING                                                              | 189 | 0.504059 | 2.12562  | <0.0001 | 8.31E-04 |
| GO DNA TEMPLATED TRANSCRIPTION TERMINATION                                          | 97  | 0.619712 | 2.124853 | <0.0001 | 8.51E-04 |
| GO PRONUCLEUS                                                                       | 15  | 0.876588 | 2.124475 | <0.0001 | 8.47E-04 |
| GO NEGATIVE REGULATION OF CELLULAR PROTEIN CATABOLIC PROCESS                        | 60  | 0.555375 | 2.123024 | <0.0001 | 8.64E-04 |
| GO NEGATIVE REGULATION OF TELOMERE MAINTENANCE VIA TELOMERE LENGTHENING             | 17  | 0.764254 | 2.12233  | <0.0001 | 8.64E-04 |
| GO REGULATION OF DNA RECOMBINATION                                                  | 53  | 0.600588 | 2.121909 | <0.0001 | 8.69E-04 |
| GO CHROMOSOME ORGANIZATION INVOLVED IN MEIOTIC CELL CYCLE                           | 40  | 0.648128 | 2.120865 | <0.0001 | 8.77E-04 |
| GO PROTEIN UBIQUITINATION INVOLVED IN UBIQUITIN DEPENDENT PROTEIN CATABOLIC PROCESS | 127 | 0.519567 | 2.11974  | <0.0001 | 8.84E-04 |
| GO SITE OF DOUBLE STRAND BREAK                                                      | 28  | 0.665192 | 2.119519 | <0.0001 | 8.79E-04 |
| GO HOMOLOGOUS CHROMOSOME SEGREGATION                                                | 37  | 0.656093 | 2.118767 | <0.0001 | 8.79E-04 |
| GO DNA PACKAGING                                                                    | 168 | 0.663263 | 2.117413 | <0.0001 | 8.85E-04 |
| GO PROTEASOME COMPLEX                                                               | 73  | 0.694556 | 2.112586 | <0.0001 | 9.17E-04 |
| GO KINESIN COMPLEX                                                                  | 53  | 0.646585 | 2.109551 | <0.0001 | 9.87E-04 |
| GO HISTONE MRNA METABOLIC PROCESS                                                   | 28  | 0.716639 | 2.109461 | <0.0001 | 9.82E-04 |
| GO ATP DEPENDENT CHROMATIN REMODELING                                               | 67  | 0.701622 | 2.10939  | <0.0001 | 9.77E-04 |
| GO G1 DNA DAMAGE CHECKPOINT                                                         | 68  | 0.546826 | 2.107086 | <0.0001 | 0.001005 |
| GO MITOTIC G2 M TRANSITION CHECKPOINT                                               | 17  | 0.750913 | 2.106567 | <0.0001 | 0.001016 |
| GO CYTOPLASMIC MICROTUBULE                                                          | 51  | 0.535228 | 2.105276 | <0.0001 | 0.001039 |
| GO PROTEASOMAL PROTEIN CATABOLIC PROCESS                                            | 263 | 0.504103 | 2.103537 | <0.0001 | 0.001064 |
| GO MICROTUBULE POLYMERIZATION OR DEPOLYMERIZATION                                   | 38  | 0.604628 | 2.102253 | <0.0001 | 0.001076 |
| GO NUCLEOTIDYLTRANSFERASE ACTIVITY                                                  | 123 | 0.522834 | 2.101443 | <0.0001 | 0.001081 |
| GO MRNA CIS SPLICING VIA SPLICEOSOME                                                | 18  | 0.769609 | 2.101046 | <0.0001 | 0.001075 |
| GO SEX CHROMOSOME                                                                   | 27  | 0.721345 | 2.100896 | <0.0001 | 0.001075 |
| GO PROTEIN K63 LINKED UBIQUITINATION                                                | 34  | 0.60511  | 2.100563 | <0.0001 | 0.001078 |
| GO REGULATION OF DOUBLE STRAND BREAK REPAIR VIA HOMOLOGOUS RECOMBINATION            | 17  | 0.749607 | 2.099855 | <0.0001 | 0.001077 |

|                                                                                                              |     |          |          |          |          |
|--------------------------------------------------------------------------------------------------------------|-----|----------|----------|----------|----------|
| GO NUCLEAR ENVELOPE                                                                                          | 381 | 0.444484 | 2.097347 | <0.0001  | 0.001134 |
| GO MICROTUBULE ORGANIZING CENTER ORGANIZATION                                                                | 79  | 0.587396 | 2.094939 | <0.0001  | 0.001161 |
| GO POSITIVE REGULATION OF CYTOKINESIS                                                                        | 28  | 0.677782 | 2.092981 | <0.0001  | 0.001183 |
| GO DAMAGED DNA BINDING                                                                                       | 62  | 0.600791 | 2.092563 | <0.0001  | 0.001181 |
| GO ENDONUCLEASE ACTIVITY ACTIVE WITH EITHER RIBO OR DEOXYRIBONUCLEIC ACIDS AND PRODUCING 5 PHOSPHOMONOESTERS | 34  | 0.687019 | 2.092477 | <0.0001  | 0.001176 |
| GO PROTEIN K11 LINKED UBIQUITINATION                                                                         | 26  | 0.720149 | 2.092397 | <0.0001  | 0.001175 |
| GO CENTROMERE COMPLEX ASSEMBLY                                                                               | 42  | 0.83007  | 2.091972 | <0.0001  | 0.00117  |
| GO NUCLEAR MEMBRANE                                                                                          | 254 | 0.442553 | 2.090459 | <0.0001  | 0.0012   |
| GO NEGATIVE REGULATION OF CELL CYCLE G2 M PHASE TRANSITION                                                   | 23  | 0.650065 | 2.09025  | <0.0001  | 0.001205 |
| GO NUCLEAR TRANSCRIPTION FACTOR COMPLEX                                                                      | 125 | 0.497975 | 2.08997  | <0.0001  | 0.001215 |
| GO MICROTUBULE                                                                                               | 382 | 0.466857 | 2.089097 | <0.0001  | 0.001226 |
| GO REGULATION OF PROTEIN CATABOLIC PROCESS                                                                   | 376 | 0.440554 | 2.087006 | <0.0001  | 0.001255 |
| GO REGULATION OF CYTOKINESIS                                                                                 | 56  | 0.594412 | 2.08659  | 0.002033 | 0.001257 |
| GO NUCLEIC ACID PHOSPHODIESTER BOND HYDROLYSIS                                                               | 230 | 0.505722 | 2.085398 | <0.0001  | 0.00128  |
| GO REGULATION OF CELL CYCLE ARREST                                                                           | 100 | 0.50346  | 2.084802 | <0.0001  | 0.001278 |
| GO ATPASE ACTIVITY COUPLED                                                                                   | 307 | 0.462702 | 2.083445 | <0.0001  | 0.001295 |
| GO SPINDLE LOCALIZATION                                                                                      | 36  | 0.658816 | 2.082772 | <0.0001  | 0.001311 |
| GO SPINDLE CHECKPOINT                                                                                        | 23  | 0.789185 | 2.081658 | <0.0001  | 0.001342 |
| GO STRUCTURE SPECIFIC DNA BINDING                                                                            | 114 | 0.547135 | 2.080812 | <0.0001  | 0.001343 |
| GO REPLISOME                                                                                                 | 29  | 0.729958 | 2.079841 | <0.0001  | 0.001351 |
| GO TETRAHYDROFOLATE METABOLIC PROCESS                                                                        | 19  | 0.752778 | 2.079126 | <0.0001  | 0.00138  |
| GO ANAPHASE PROMOTING COMPLEX                                                                                | 20  | 0.759091 | 2.07903  | <0.0001  | 0.001379 |
| GO NUCLEOBASE METABOLIC PROCESS                                                                              | 37  | 0.617506 | 2.078126 | <0.0001  | 0.001392 |
| GO SMALL NUCLEAR RIBONUCLEOPROTEIN COMPLEX                                                                   | 59  | 0.652356 | 2.077093 | <0.0001  | 0.001401 |
| GO NEGATIVE REGULATION OF DNA METABOLIC PROCESS                                                              | 104 | 0.518733 | 2.074403 | <0.0001  | 0.001466 |
| GO HISTONE EXCHANGE                                                                                          | 46  | 0.782576 | 2.074084 | <0.0001  | 0.00146  |
| GO RIBONUCLEOPROTEIN COMPLEX BINDING                                                                         | 89  | 0.561971 | 2.072373 | <0.0001  | 0.001482 |
| GO PURINE NTP DEPENDENT HELICASE ACTIVITY                                                                    | 95  | 0.620812 | 2.070938 | <0.0001  | 0.001525 |
| GO TRNA TRANSPORT                                                                                            | 32  | 0.73912  | 2.069882 | <0.0001  | 0.001541 |
| GO NUCLEAR UBIQUITIN LIGASE COMPLEX                                                                          | 39  | 0.643382 | 2.067242 | <0.0001  | 0.001578 |
| GO MRNA 3 END PROCESSING                                                                                     | 71  | 0.614101 | 2.064766 | <0.0001  | 0.00161  |
| GO NEGATIVE REGULATION OF CHROMATIN MODIFICATION                                                             | 44  | 0.588164 | 2.062891 | 0.002033 | 0.001667 |
| GO POSITIVE REGULATION OF CELL CYCLE ARREST                                                                  | 79  | 0.514629 | 2.061679 | <0.0001  | 0.001699 |
| GO CAJAL BODY                                                                                                | 49  | 0.599402 | 2.061581 | <0.0001  | 0.001692 |
| GO MICROTUBULE BASED PROCESS                                                                                 | 478 | 0.478984 | 2.059913 | <0.0001  | 0.001736 |
| GO NUCLEAR CHROMOSOME TELOMERIC REGION                                                                       | 122 | 0.623248 | 2.058962 | <0.0001  | 0.001766 |

|                                                                              |     |          |          |          |          |
|------------------------------------------------------------------------------|-----|----------|----------|----------|----------|
| GO REGULATION OF CYCLIN DEPENDENT PROTEIN KINASE ACTIVITY                    | 93  | 0.489607 | 2.058285 | <0.0001  | 0.00178  |
| GO INNATE IMMUNE RESPONSE ACTIVATING CELL SURFACE RECEPTOR SIGNALING PATHWAY | 104 | 0.574565 | 2.055366 | <0.0001  | 0.001868 |
| GO NUCLEAR BODY                                                              | 334 | 0.466245 | 2.053154 | <0.0001  | 0.001906 |
| GO REGULATION OF CELL CYCLE G1 S PHASE TRANSITION                            | 140 | 0.467089 | 2.05264  | <0.0001  | 0.001898 |
| GO NUCLEASE ACTIVITY                                                         | 185 | 0.487587 | 2.0515   | <0.0001  | 0.001906 |
| GO PEPTIDYL LYSINE MODIFICATION                                              | 278 | 0.491665 | 2.050568 | <0.0001  | 0.001926 |
| GO PROTEIN IMPORT                                                            | 150 | 0.466603 | 2.050474 | <0.0001  | 0.001925 |
| GO NUCLEOTIDE EXCISION REPAIR DNA GAP FILLING                                | 24  | 0.749686 | 2.049907 | <0.0001  | 0.001931 |
| GO ENDODEOXYRIBONUCLEASE ACTIVITY                                            | 48  | 0.59768  | 2.047833 | <0.0001  | 0.002002 |
| GO POSTTRANSCRIPTIONAL REGULATION OF GENE EXPRESSION                         | 417 | 0.470535 | 2.046749 | <0.0001  | 0.002034 |
| GO SIN3 TYPE COMPLEX                                                         | 16  | 0.755286 | 2.045962 | <0.0001  | 0.002059 |
| GO GLUCOSE CATABOLIC PROCESS                                                 | 27  | 0.68746  | 2.045804 | <0.0001  | 0.00206  |
| GO NUCLEOBASE BIOSYNTHETIC PROCESS                                           | 17  | 0.79253  | 2.04479  | <0.0001  | 0.002076 |
| GO BLASTOCYST DEVELOPMENT                                                    | 58  | 0.573738 | 2.044439 | <0.0001  | 0.002074 |
| GO REGULATION OF ESTABLISHMENT OF PLANAR POLARITY                            | 109 | 0.539472 | 2.042935 | <0.0001  | 0.002145 |
| GO POSITIVE REGULATION OF NUCLEAR DIVISION                                   | 57  | 0.566496 | 2.04152  | <0.0001  | 0.002171 |
| GO TRANSLESION SYNTHESIS                                                     | 36  | 0.630423 | 2.041181 | <0.0001  | 0.002174 |
| GO DEOXYRIBONUCLEASE ACTIVITY                                                | 63  | 0.578395 | 2.040374 | 0.001976 | 0.002207 |
| GO REGULATION OF TRANSCRIPTION FROM RNA POLYMERASE I PROMOTER                | 23  | 0.68993  | 2.035615 | 0.002088 | 0.00235  |
| GO RESPONSE TO GAMMA RADIATION                                               | 49  | 0.558019 | 2.033648 | <0.0001  | 0.002393 |
| GO PURINE NUCLEOBASE METABOLIC PROCESS                                       | 19  | 0.722068 | 2.033642 | <0.0001  | 0.002384 |
| GO POSITIVE REGULATION OF CELL DIVISION                                      | 117 | 0.502408 | 2.030531 | <0.0001  | 0.002512 |
| GO SIGNAL TRANSDUCTION BY P53 CLASS MEDIATOR                                 | 120 | 0.463386 | 2.028517 | <0.0001  | 0.00258  |
| GO TELOMERE ORGANIZATION                                                     | 101 | 0.62577  | 2.027951 | <0.0001  | 0.002608 |
| GO TUBULIN BINDING                                                           | 255 | 0.459135 | 2.027368 | <0.0001  | 0.002612 |
| GO CHROMATIN                                                                 | 407 | 0.508486 | 2.026913 | <0.0001  | 0.002613 |
| GO TRNA METABOLIC PROCESS                                                    | 166 | 0.601979 | 2.026295 | <0.0001  | 0.002647 |
| GO DOUBLE STRANDED RNA BINDING                                               | 59  | 0.563095 | 2.022902 | 0.004049 | 0.00276  |
| GO AMINO ACID ACTIVATION                                                     | 51  | 0.675329 | 2.022626 | <0.0001  | 0.002766 |
| GO RETROGRADE VESICLE MEDIATED TRANSPORT GOLGI TO ER                         | 75  | 0.564983 | 2.022472 | <0.0001  | 0.002756 |
| GO DNA SECONDARY STRUCTURE BINDING                                           | 24  | 0.709612 | 2.021259 | <0.0001  | 0.002805 |
| GO MICROTUBULE END                                                           | 21  | 0.722394 | 2.0212   | <0.0001  | 0.0028   |
| GO DNA TEMPLATED TRANSCRIPTION ELONGATION                                    | 86  | 0.583727 | 2.020248 | <0.0001  | 0.002837 |
| GO RNA POLYMERASE II TRANSCRIPTION FACTOR COMPLEX                            | 100 | 0.497652 | 2.018995 | <0.0001  | 0.002893 |
| GO REGULATION OF CHROMATIN SILENCING                                         | 21  | 0.693397 | 2.018679 | 0.002037 | 0.002887 |
| GO LIGASE ACTIVITY FORMING CARBON                                            | 44  | 0.669263 | 2.013368 | <0.0001  | 0.003115 |



|                                                                  |     |          |          |          |          |
|------------------------------------------------------------------|-----|----------|----------|----------|----------|
| OXYGEN BONDS                                                     |     |          |          |          |          |
| GO MICROTUBULE ORGANIZING CENTER PART                            | 133 | 0.530512 | 2.012034 | <0.0001  | 0.003147 |
| GO SIGNAL SEQUENCE BINDING                                       | 36  | 0.617951 | 2.009804 | 0.001961 | 0.003217 |
| GO CENTRIOLE                                                     | 91  | 0.559179 | 2.007612 | <0.0001  | 0.003313 |
| GO NUCLEOSOME BINDING                                            | 44  | 0.628761 | 2.007399 | <0.0001  | 0.003316 |
| GO EXOSOME RNASE COMPLEX                                         | 21  | 0.72222  | 2.007186 | <0.0001  | 0.003308 |
| GO RNA POLYMERASE COMPLEX                                        | 118 | 0.548817 | 2.005213 | <0.0001  | 0.003412 |
| GO NON CANONICAL WNT SIGNALING PATHWAY                           | 134 | 0.494763 | 2.004289 | <0.0001  | 0.003439 |
| GO REGULATION OF TELOMERASE RNA LOCALIZATION TO CAJAL BODY       | 15  | 0.849887 | 2.002976 | <0.0001  | 0.003474 |
| GO ENDORIBONUCLEASE ACTIVITY PRODUCING 5 PHOSPHOMONOESTERS       | 26  | 0.725648 | 2.000846 | <0.0001  | 0.003587 |
| GO CELLULAR COMPONENT DISASSEMBLY                                | 488 | 0.444763 | 1.997593 | <0.0001  | 0.003757 |
| GO NEGATIVE REGULATION OF HISTONE MODIFICATION                   | 35  | 0.579851 | 1.997108 | 0.001992 | 0.003774 |
| GO NUCLEAR LOCALIZATION SEQUENCE BINDING                         | 20  | 0.728355 | 1.996613 | <0.0001  | 0.003795 |
| GO NEGATIVE REGULATION OF MRNA METABOLIC PROCESS                 | 34  | 0.645281 | 1.995869 | <0.0001  | 0.003841 |
| GO ESTABLISHMENT OF MITOTIC SPINDLE LOCALIZATION                 | 23  | 0.667858 | 1.995189 | <0.0001  | 0.003846 |
| GO UNFOLDED PROTEIN BINDING                                      | 89  | 0.587009 | 1.991007 | <0.0001  | 0.004014 |
| GO PROTEIN IMPORT INTO NUCLEUS TRANSLOCATION                     | 28  | 0.596557 | 1.990693 | <0.0001  | 0.004029 |
| GO CELLULAR RESPONSE TO HEAT                                     | 33  | 0.591322 | 1.990574 | <0.0001  | 0.004025 |
| GO TRANSFERASE COMPLEX TRANSFERRING PHOSPHORUS CONTAINING GROUPS | 230 | 0.457449 | 1.989615 | <0.0001  | 0.004049 |
| GO ISOTYPE SWITCHING                                             | 16  | 0.693633 | 1.989613 | <0.0001  | 0.004036 |
| GO PRERIBOSOME                                                   | 58  | 0.706518 | 1.9866   | <0.0001  | 0.004197 |
| GO NIK NF KAPPAB SIGNALING                                       | 82  | 0.610002 | 1.985987 | <0.0001  | 0.004222 |
| GO POSITIVE REGULATION OF PROTEIN CATABOLIC PROCESS              | 253 | 0.439146 | 1.981675 | <0.0001  | 0.004453 |
| GO REGULATION OF MRNA SPLICING VIA SPLICEOSOME                   | 60  | 0.597332 | 1.978694 | 0.001972 | 0.004591 |
| GO CELL DIVISION SITE                                            | 47  | 0.570848 | 1.978354 | <0.0001  | 0.004606 |
| GO PROTEIN MONOUBIQUITINATION                                    | 49  | 0.581073 | 1.976087 | 0.002024 | 0.004734 |
| GO POLY PYRIMIDINE TRACT BINDING                                 | 17  | 0.712145 | 1.975975 | <0.0001  | 0.004726 |
| GO HSP70 PROTEIN BINDING                                         | 28  | 0.586135 | 1.975079 | <0.0001  | 0.004793 |
| GO MLL1 2 COMPLEX                                                | 26  | 0.667424 | 1.972742 | <0.0001  | 0.004955 |
| GO INO80 TYPE COMPLEX                                            | 21  | 0.671806 | 1.972387 | <0.0001  | 0.004969 |
| GO NUCLEOTIDE EXCISION REPAIR DNA INCISION                       | 39  | 0.619028 | 1.97208  | <0.0001  | 0.004974 |
| GO NEGATIVE REGULATION OF MRNA SPLICING VIA SPLICEOSOME          | 19  | 0.736555 | 1.971953 | 0.001905 | 0.004974 |
| GO DNA DOUBLE STRAND BREAK PROCESSING                            | 19  | 0.690377 | 1.970552 | 0.003839 | 0.005045 |
| GO POSITIVE REGULATION OF CELL CYCLE G2 M PHASE TRANSITION       | 18  | 0.666374 | 1.969115 | <0.0001  | 0.005129 |
| GO PCG PROTEIN COMPLEX                                           | 43  | 0.576323 | 1.969029 | <0.0001  | 0.00513  |

|                                                           |     |          |          |          |          |
|-----------------------------------------------------------|-----|----------|----------|----------|----------|
| GO SNRNA BINDING                                          | 33  | 0.61198  | 1.967201 | 0.001898 | 0.005235 |
| GO NUCLEOSOMAL DNA BINDING                                | 29  | 0.675457 | 1.962143 | 0.005917 | 0.00559  |
| GO ATP DEPENDENT MICROTUBULE MOTOR ACTIVITY               | 18  | 0.757944 | 1.958766 | 0.002079 | 0.005794 |
| GO CYCLIN DEPENDENT PROTEIN KINASE HOLOENZYME COMPLEX     | 30  | 0.578602 | 1.958431 | <0.0001  | 0.005797 |
| GO REGULATION OF CELLULAR AMINO ACID METABOLIC PROCESS    | 65  | 0.645287 | 1.957956 | 0.001908 | 0.005819 |
| GO POSITIVE REGULATION OF DNA REPAIR                      | 33  | 0.609803 | 1.957251 | 0.004057 | 0.005844 |
| GO BINDING OF SPERM TO ZONA PELLUCIDA                     | 30  | 0.603644 | 1.956881 | <0.0001  | 0.005842 |
| GO REGULATION OF TELOMERASE ACTIVITY                      | 41  | 0.538606 | 1.956742 | 0.001957 | 0.005826 |
| GO PROTEIN EXPORT FROM NUCLEUS                            | 29  | 0.597052 | 1.95665  | 0.00211  | 0.005816 |
| GO RNA HELICASE ACTIVITY                                  | 67  | 0.581054 | 1.953531 | 0.008081 | 0.006006 |
| GO NEGATIVE REGULATION OF TELOMERE MAINTENANCE            | 26  | 0.626078 | 1.951759 | 0.001934 | 0.006148 |
| GO PROTEIN LOCALIZATION TO CYTOSKELETON                   | 28  | 0.611033 | 1.95158  | 0.002101 | 0.006143 |
| GO RIBONUCLEOPROTEIN GRANULE                              | 139 | 0.47102  | 1.951298 | 0.006061 | 0.006147 |
| GO REGULATION OF CYTOSKELETON ORGANIZATION                | 470 | 0.408174 | 1.950907 | <0.0001  | 0.006142 |
| GO ATP DEPENDENT DNA HELICASE ACTIVITY                    | 32  | 0.690019 | 1.950762 | <0.0001  | 0.006132 |
| GO REGULATION OF CELL AGING                               | 32  | 0.566408 | 1.950722 | 0.002075 | 0.006119 |
| GO CHROMATIN BINDING                                      | 408 | 0.455481 | 1.950214 | <0.0001  | 0.00613  |
| GO MICROTUBULE PLUS END                                   | 16  | 0.749567 | 1.950093 | <0.0001  | 0.006117 |
| GO CHROMATIN MODIFICATION                                 | 490 | 0.460759 | 1.945957 | 0.002096 | 0.006419 |
| GO PROTEIN DEPOLYMERIZATION                               | 23  | 0.637516 | 1.945866 | 0.009785 | 0.006402 |
| GO FOUR WAY JUNCTION DNA BINDING                          | 15  | 0.789724 | 1.943281 | <0.0001  | 0.006566 |
| GO NUCLEOLAR PART                                         | 59  | 0.67099  | 1.942796 | <0.0001  | 0.00659  |
| GO POSITIVE REGULATION OF NEURON DEATH                    | 66  | 0.483996 | 1.942553 | 0.00211  | 0.006588 |
| GO MICROTUBULE ASSOCIATED COMPLEX                         | 141 | 0.48594  | 1.941958 | <0.0001  | 0.006616 |
| GO PROTEASOME BINDING                                     | 16  | 0.710134 | 1.93915  | <0.0001  | 0.006838 |
| GO TRNA BINDING                                           | 43  | 0.601568 | 1.939055 | <0.0001  | 0.006823 |
| GO POSITIVE REGULATION OF VIRAL GENOME REPLICATION        | 29  | 0.565314 | 1.937777 | 0.002066 | 0.006905 |
| GO ENDONUCLEASE ACTIVITY                                  | 115 | 0.477319 | 1.936932 | <0.0001  | 0.006936 |
| GO POSITIVE REGULATION OF RESPONSE TO DNA DAMAGE STIMULUS | 58  | 0.50394  | 1.936397 | <0.0001  | 0.00695  |
| GO NCRNA METABOLIC PROCESS                                | 499 | 0.566412 | 1.932687 | <0.0001  | 0.007279 |
| GO REGULATION OF CELL CYCLE CHECKPOINT                    | 27  | 0.631019 | 1.932066 | <0.0001  | 0.007328 |
| GO NEGATIVE REGULATION OF PROTEIN CATABOLIC PROCESS       | 103 | 0.441005 | 1.931086 | <0.0001  | 0.007397 |
| GO RESPONSE TO UV                                         | 119 | 0.446063 | 1.930994 | <0.0001  | 0.007387 |
| GO REGULATION OF MRNA METABOLIC PROCESS                   | 113 | 0.524709 | 1.930349 | 0.004032 | 0.007423 |
| GO POSITIVE REGULATION OF CANONICAL WNT SIGNALING PATHWAY | 115 | 0.483245 | 1.929143 | <0.0001  | 0.007517 |
| GO MITOCHONDRIAL RNA METABOLIC PROCESS                    | 23  | 0.70645  | 1.928335 | 0.001957 | 0.007557 |
| GO PROTEIN DNA COMPLEX SUBUNIT ORGANIZATION               | 208 | 0.567237 | 1.927983 | <0.0001  | 0.00757  |
| GO SMALL SUBUNIT PROCESSOME                               | 32  | 0.701533 | 1.926433 | <0.0001  | 0.007716 |

|                                                                                                             |     |          |          |          |          |
|-------------------------------------------------------------------------------------------------------------|-----|----------|----------|----------|----------|
| GO CELLULAR RESPONSE TO UV                                                                                  | 65  | 0.479396 | 1.926373 | <0.0001  | 0.007697 |
| GO NUCLEOTIDE EXCISION REPAIR                                                                               | 111 | 0.529919 | 1.92591  | <0.0001  | 0.007711 |
| GO SINGLE STRANDED RNA BINDING                                                                              | 63  | 0.507797 | 1.92423  | <0.0001  | 0.007818 |
| GO EXONUCLEASE ACTIVITY ACTIVE WITH EITHER RIBO OR DEOXYRIBONUCLEIC ACIDS AND PRODUCING 5 PHOSPHOMONOESTERS | 40  | 0.573445 | 1.922355 | <0.0001  | 0.00797  |
| GO IMMUNOGLOBULIN PRODUCTION                                                                                | 40  | 0.54922  | 1.920782 | 0.004115 | 0.008064 |
| GO CELLULAR RESPONSE TO RADIATION                                                                           | 130 | 0.438634 | 1.920774 | <0.0001  | 0.008041 |
| GO CELL AGING                                                                                               | 66  | 0.4715   | 1.920244 | <0.0001  | 0.008086 |
| GO TRANSCRIPTION ELONGATION FROM RNA POLYMERASE II PROMOTER                                                 | 71  | 0.570245 | 1.91935  | 0.001942 | 0.008145 |
| GO XY BODY                                                                                                  | 15  | 0.70743  | 1.919339 | <0.0001  | 0.008123 |
| GO CELLULAR RESPONSE TO GAMMA RADIATION                                                                     | 19  | 0.630048 | 1.916696 | 0.003891 | 0.008373 |
| GO DNA DIRECTED RNA POLYMERASE II HOLOENZYME                                                                | 93  | 0.531042 | 1.916409 | <0.0001  | 0.00838  |
| GO REGULATION OF UBIQUITIN PROTEIN LIGASE ACTIVITY                                                          | 17  | 0.654628 | 1.915393 | 0.007921 | 0.008458 |
| GO REGULATION OF HISTONE H3 K9 METHYLATION                                                                  | 17  | 0.706456 | 1.915267 | 0.00409  | 0.008448 |
| GO PROTEASOME ACCESSORY COMPLEX                                                                             | 23  | 0.784498 | 1.91342  | 0.001934 | 0.008625 |
| GO TRANSCRIPTION COUPLED NUCLEOTIDE EXCISION REPAIR                                                         | 72  | 0.576611 | 1.911912 | <0.0001  | 0.008723 |
| GO SPLICEOSOMAL SNRNP ASSEMBLY                                                                              | 37  | 0.671244 | 1.910732 | 0.001916 | 0.008837 |
| GO REGULATION OF MITOPHAGY                                                                                  | 40  | 0.522894 | 1.909798 | <0.0001  | 0.008894 |
| GO NEGATIVE REGULATION OF DNA DEPENDENT DNA REPLICATION                                                     | 15  | 0.742569 | 1.908885 | <0.0001  | 0.008973 |
| GO CHROMATIN ASSEMBLY OR DISASSEMBLY                                                                        | 155 | 0.600986 | 1.906897 | 0.001898 | 0.009157 |
| GO NLS BEARING PROTEIN IMPORT INTO NUCLEUS                                                                  | 22  | 0.677237 | 1.9055   | 0.002114 | 0.009281 |
| GO RNA POLYADENYLATION                                                                                      | 29  | 0.632729 | 1.905279 | 0.002049 | 0.009284 |
| GO CYCLIN DEPENDENT PROTEIN SERINE THREONINE KINASE REGULATOR ACTIVITY                                      | 27  | 0.590407 | 1.904319 | 0.001972 | 0.009365 |
| GO MRNA CLEAVAGE FACTOR COMPLEX                                                                             | 17  | 0.704436 | 1.904285 | 0.004175 | 0.009344 |
| GO PROTEIN LOCALIZATION TO NUCLEUS                                                                          | 151 | 0.427168 | 1.903204 | 0.006211 | 0.009409 |
| GO NF KAPPAB BINDING                                                                                        | 30  | 0.566962 | 1.898048 | <0.0001  | 0.010026 |
| GO ACETYLTRANSFERASE COMPLEX                                                                                | 84  | 0.51639  | 1.897359 | 0.002045 | 0.010086 |
| GO REGULATION OF CELLULAR AMINE METABOLIC PROCESS                                                           | 85  | 0.561863 | 1.896218 | 0.001946 | 0.010178 |
| GO POSITIVE REGULATION OF PROTEOLYSIS                                                                       | 349 | 0.41401  | 1.894209 | <0.0001  | 0.010357 |
| GO PROTEIN FOLDING                                                                                          | 201 | 0.482604 | 1.891141 | <0.0001  | 0.010722 |
| GO UBIQUITIN LIKE PROTEIN BINDING                                                                           | 113 | 0.457638 | 1.890835 | 0.004032 | 0.010742 |
| GO DNA REPAIR COMPLEX                                                                                       | 37  | 0.559843 | 1.889806 | 0.001961 | 0.01085  |
| GO CYTOPLASMIC EXOSOME RNASE COMPLEX                                                                        | 15  | 0.721734 | 1.888195 | 0.001946 | 0.011025 |
| GO H4 HISTONE ACETYLTRANSFERASE COMPLEX                                                                     | 17  | 0.634118 | 1.886145 | 0.001869 | 0.011285 |
| GO MATURATION OF 5 8S RRNA                                                                                  | 28  | 0.701784 | 1.884435 | <0.0001  | 0.011493 |
| GO ATP GENERATION FROM ADP                                                                                  | 35  | 0.60292  | 1.884237 | 0.004016 | 0.011495 |
| GO FOLIC ACID CONTAINING COMPOUND                                                                           | 27  | 0.624835 | 1.883254 | 0.003984 | 0.011588 |

|                                                                                     |     |          |          |          |          |
|-------------------------------------------------------------------------------------|-----|----------|----------|----------|----------|
| METABOLIC PROCESS                                                                   |     |          |          |          |          |
| GO TRNA PROCESSING                                                                  | 106 | 0.576374 | 1.882467 | 0.001996 | 0.011681 |
| GO FC EPSILON RECEPTOR SIGNALING PATHWAY                                            | 123 | 0.483135 | 1.879075 | 0.001988 | 0.012117 |
| GO NADH METABOLIC PROCESS                                                           | 33  | 0.607637 | 1.877635 | 0.001992 | 0.012257 |
| GO NEGATIVE REGULATION OF CELL CYCLE G1 S PHASE TRANSITION                          | 92  | 0.436219 | 1.876152 | <0.0001  | 0.012412 |
| GO REGULATION OF CENTROSOME DUPLICATION                                             | 31  | 0.604743 | 1.873241 | <0.0001  | 0.012852 |
| GO NUCLEAR TRANSCRIBED MRNA CATABOLIC PROCESS EXONUCLEOLYTIC                        | 30  | 0.640966 | 1.872181 | 0.003945 | 0.012993 |
| GO RESPONSE TO X RAY                                                                | 30  | 0.582953 | 1.871829 | 0.003968 | 0.013016 |
| GO SYNAPTONEMAL COMPLEX                                                             | 31  | 0.602429 | 1.87148  | 0.006122 | 0.013031 |
| GO NEGATIVE REGULATION OF RNA SPLICING                                              | 24  | 0.666734 | 1.869855 | 0.001898 | 0.013206 |
| GO ANTIGEN PROCESSING AND PRESENTATION OF PEPTIDE ANTIGEN VIA MHC CLASS I           | 89  | 0.577135 | 1.869513 | 0.004016 | 0.013226 |
| GO RIBONUCLEOPROTEIN COMPLEX SUBUNIT ORGANIZATION                                   | 185 | 0.529503 | 1.866915 | 0.001901 | 0.013557 |
| GO REGULATION OF GLUCOSE TRANSPORT                                                  | 93  | 0.463482 | 1.866481 | 0.002075 | 0.013585 |
| GO UBIQUITIN LIKE PROTEIN CONJUGATING ENZYME ACTIVITY                               | 29  | 0.625652 | 1.865029 | 0.003953 | 0.013773 |
| GO SPERM EGG RECOGNITION                                                            | 40  | 0.525301 | 1.864832 | <0.0001  | 0.01377  |
| GO POSITIVE REGULATION OF PROTEIN LOCALIZATION TO NUCLEUS                           | 126 | 0.412816 | 1.864817 | 0.00202  | 0.013736 |
| GO MACROMOLECULAR COMPLEX DISASSEMBLY                                               | 175 | 0.544758 | 1.861033 | <0.0001  | 0.014306 |
| GO ANTIGEN PROCESSING AND PRESENTATION OF EXOGENOUS PEPTIDE ANTIGEN VIA MHC CLASS I | 64  | 0.652445 | 1.855162 | 0.008264 | 0.015237 |
| GO TELOMERASE HOLOENZYME COMPLEX                                                    | 19  | 0.657177 | 1.853749 | 0.006061 | 0.015419 |
| GO ERROR FREE TRANSLESION SYNTHESIS                                                 | 17  | 0.714489 | 1.853585 | 0.003929 | 0.015395 |
| GO GAMMA TUBULIN COMPLEX                                                            | 19  | 0.620028 | 1.85051  | 0.004132 | 0.015806 |
| GO PRERIBOSOME LARGE SUBUNIT PRECURSOR                                              | 20  | 0.773507 | 1.850055 | <0.0001  | 0.015843 |
| GO PROTEIN LOCALIZATION TO CENTROSOME                                               | 15  | 0.653704 | 1.849332 | 0.002045 | 0.015926 |
| GO SWI SNF SUPERFAMILY TYPE COMPLEX                                                 | 71  | 0.530242 | 1.849134 | 0.008214 | 0.015922 |
| GO RNA SECONDARY STRUCTURE UNWINDING                                                | 40  | 0.563401 | 1.847795 | 0.007937 | 0.016138 |
| GO POSITIVE REGULATION OF CELL CYCLE G1 S PHASE TRANSITION                          | 28  | 0.563727 | 1.84717  | 0.002066 | 0.016193 |
| GO NEGATIVE REGULATION OF CANONICAL WNT SIGNALING PATHWAY                           | 156 | 0.442693 | 1.846983 | <0.0001  | 0.016195 |
| GO RIBONUCLEOPROTEIN COMPLEX BIOGENESIS                                             | 413 | 0.567017 | 1.844167 | 0.011858 | 0.016681 |
| GO HISTONE DEACETYLASE BINDING                                                      | 102 | 0.445026 | 1.844106 | <0.0001  | 0.016657 |
| GO PORE COMPLEX ASSEMBLY                                                            | 15  | 0.688542 | 1.843834 | 0.002041 | 0.016683 |
| GO DNA LIGATION                                                                     | 16  | 0.676013 | 1.843667 | <0.0001  | 0.016673 |
| GO RNA PHOSPHODIESTER BOND HYDROLYSIS                                               | 107 | 0.487643 | 1.843652 | 0.001883 | 0.016633 |
| GO ESC E Z COMPLEX                                                                  | 16  | 0.700788 | 1.842375 | 0.002137 | 0.016833 |
| GO NUCLEOCYTOPLASMIC TRANSPORTER ACTIVITY                                           | 23  | 0.669362 | 1.84215  | 0.002123 | 0.016843 |

|                                                                                                        |     |          |          |          |          |
|--------------------------------------------------------------------------------------------------------|-----|----------|----------|----------|----------|
| GO PROTEIN PHOSPHATASE 2A BINDING                                                                      | 27  | 0.563034 | 1.841461 | 0.006024 | 0.01693  |
| GO POLY PURINE TRACT BINDING                                                                           | 18  | 0.682015 | 1.841196 | 0.008299 | 0.016925 |
| GO RNA POLYMERASE ACTIVITY                                                                             | 43  | 0.576239 | 1.838756 | 0.003883 | 0.017338 |
| GO NUCLEAR CHROMATIN                                                                                   | 275 | 0.465706 | 1.838138 | 0.002012 | 0.01741  |
| GO CENTROSOME DUPLICATION                                                                              | 31  | 0.610027 | 1.836809 | 0.010549 | 0.017624 |
| GO RESPONSE TO HEAT                                                                                    | 85  | 0.447932 | 1.83321  | 0.00198  | 0.018264 |
| GO POSITIVE REGULATION OF NEURON APOPTOTIC PROCESS                                                     | 46  | 0.477779 | 1.831928 | 0.002088 | 0.018428 |
| GO POSITIVE REGULATION OF CELLULAR PROTEIN LOCALIZATION                                                | 335 | 0.359166 | 1.831898 | <0.0001  | 0.018392 |
| GO NUCLEAR EXOSOME RNASE COMPLEX                                                                       | 15  | 0.731712 | 1.830979 | <0.0001  | 0.018548 |
| GO REGULATION OF TRANSLATIONAL INITIATION                                                              | 79  | 0.506589 | 1.827255 | 0.00969  | 0.019266 |
| GO NUCLEAR INNER MEMBRANE                                                                              | 45  | 0.480088 | 1.827133 | 0.005988 | 0.019236 |
| GO COVALENT CHROMATIN MODIFICATION                                                                     | 309 | 0.426947 | 1.827133 | 0.002045 | 0.019192 |
| GO POSITIVE REGULATION OF TELOMERASE ACTIVITY                                                          | 27  | 0.544685 | 1.824107 | 0.005964 | 0.019788 |
| GO REGULATION OF PROTEIN EXPORT FROM NUCLEUS                                                           | 33  | 0.50935  | 1.822803 | 0.009843 | 0.020058 |
| GO NUCLEAR EUCHROMATIN                                                                                 | 23  | 0.604237 | 1.822203 | 0.00202  | 0.020121 |
| GO REGULATION OF PROTEIN INSERTION INTO MITOCHONDRIAL MEMBRANE INVOLVED IN APOPTOTIC SIGNALING PATHWAY | 29  | 0.563618 | 1.82211  | 0.006012 | 0.020081 |
| GO MRNA BINDING                                                                                        | 143 | 0.466241 | 1.82181  | 0.009728 | 0.020108 |
| GO NAD METABOLIC PROCESS                                                                               | 49  | 0.535022 | 1.820286 | 0.001988 | 0.020383 |
| GO N ACYLTRANSFERASE ACTIVITY                                                                          | 92  | 0.45886  | 1.817552 | 0.001965 | 0.020937 |
| GO APOPTOTIC NUCLEAR CHANGES                                                                           | 24  | 0.572214 | 1.817411 | 0.003876 | 0.02092  |
| GO ACETYLTRANSFERASE ACTIVITY                                                                          | 92  | 0.455853 | 1.816179 | 0.005825 | 0.021126 |
| GO LRR DOMAIN BINDING                                                                                  | 16  | 0.622011 | 1.815153 | 0.003945 | 0.021319 |
| GO SMALL NUCLEOLAR RIBONUCLEOPROTEIN COMPLEX                                                           | 18  | 0.757528 | 1.814174 | <0.0001  | 0.021468 |
| GO NEGATIVE REGULATION OF HISTONE METHYLATION                                                          | 16  | 0.685921 | 1.813033 | 0.002114 | 0.021679 |
| GO MITOCHONDRIAL MEMBRANE ORGANIZATION                                                                 | 90  | 0.507315 | 1.811962 | 0.00396  | 0.021895 |
| GO RNA STABILIZATION                                                                                   | 29  | 0.56932  | 1.811077 | 0.005894 | 0.022049 |
| GO REGULATION OF PROTEIN IMPORT INTO NUCLEUS TRANSLOCATION                                             | 21  | 0.557225 | 1.81063  | 0.008147 | 0.022114 |
| GO GLUCOSYLTRANSFERASE ACTIVITY                                                                        | 16  | 0.663743 | 1.810227 | 0.005825 | 0.022185 |
| GO INTRACELLULAR STEROID HORMONE RECEPTOR SIGNALING PATHWAY                                            | 66  | 0.464702 | 1.80846  | 0.005882 | 0.022582 |
| GO PROTEIN N TERMINUS BINDING                                                                          | 101 | 0.423357 | 1.807743 | <0.0001  | 0.022707 |
| GO PTERIDINE CONTAINING COMPOUND BIOSYNTHETIC PROCESS                                                  | 16  | 0.712559 | 1.807742 | 0.003766 | 0.022657 |
| GO TRNA MODIFICATION                                                                                   | 53  | 0.568414 | 1.807369 | 0.005758 | 0.022687 |
| GO UBIQUITIN LIKE PROTEIN LIGASE BINDING                                                               | 255 | 0.389845 | 1.80564  | 0.001931 | 0.023066 |
| GO PRECATALYTIC SPLICEOSOME                                                                            | 21  | 0.717281 | 1.804753 | 0.003922 | 0.023224 |
| GO MITOCHONDRIAL FUSION                                                                                | 15  | 0.669528 | 1.803888 | 0.001905 | 0.023411 |
| GO POSITIVE REGULATION OF PROTEASOMAL                                                                  | 95  | 0.416575 | 1.80237  | 0.001957 | 0.023715 |

|                                                                                                                 |     |          |          |          |          |
|-----------------------------------------------------------------------------------------------------------------|-----|----------|----------|----------|----------|
| PROTEIN CATABOLIC PROCESS                                                                                       |     |          |          |          |          |
| GO POSITIVE REGULATION OF WNT SIGNALING PATHWAY                                                                 | 148 | 0.419547 | 1.801055 | <0.0001  | 0.023941 |
| GO NEGATIVE REGULATION OF RESPONSE TO DNA DAMAGE STIMULUS                                                       | 49  | 0.454304 | 1.800879 | <0.0001  | 0.023928 |
| GO NCRNA PROCESSING                                                                                             | 361 | 0.559782 | 1.800783 | 0.011673 | 0.023907 |
| GO MATURATION OF 5 8S RRNA FROM TRICISTRONIC RRNA TRANSCRIPT SSU RRNA 5 8S RRNA LSU RRNA                        | 19  | 0.701754 | 1.800636 | 0.005871 | 0.023886 |
| GO REGULATION OF ANOIKIS                                                                                        | 24  | 0.551068 | 1.800409 | 0.007648 | 0.023883 |
| GO NCRNA 3 END PROCESSING                                                                                       | 20  | 0.701657 | 1.800391 | 0.003914 | 0.023838 |
| GO MALE MEIOSIS                                                                                                 | 34  | 0.56026  | 1.799221 | 0.004107 | 0.024052 |
| GO RRNA TRANSCRIPTION                                                                                           | 17  | 0.650274 | 1.799148 | 0.004098 | 0.024034 |
| GO MALE MEIOSIS I                                                                                               | 15  | 0.637796 | 1.798255 | 0.00818  | 0.02421  |
| GO POSITIVE REGULATION OF MITOCHONDRIAL OUTER MEMBRANE PERMEABILIZATION INVOLVED IN APOPTOTIC SIGNALING PATHWAY | 36  | 0.54146  | 1.79801  | 0.009728 | 0.024206 |
| GO POSITIVE REGULATION OF PEPTIDYL THREONINE PHOSPHORYLATION                                                    | 24  | 0.571265 | 1.796078 | 0.010081 | 0.024567 |
| GO PROTEIN ACETYLATION                                                                                          | 112 | 0.441564 | 1.795415 | 0.004073 | 0.024683 |
| GO SUBSTANTIA NIGRA DEVELOPMENT                                                                                 | 44  | 0.519998 | 1.794092 | 0.003839 | 0.024956 |
| GO HISTONE UBIQUITINATION                                                                                       | 34  | 0.555488 | 1.792955 | 0.008264 | 0.025181 |
| GO THREONINE TYPE PEPTIDASE ACTIVITY                                                                            | 20  | 0.766481 | 1.79194  | 0.001965 | 0.02545  |
| GO NUCLEAR TRANSCRIBED MRNA CATABOLIC PROCESS DEADENYLATION DEPENDENT DECAY                                     | 53  | 0.49926  | 1.79028  | 0.005825 | 0.025816 |
| GO OOCYTE MATURATION                                                                                            | 17  | 0.600612 | 1.789635 | 0.003891 | 0.025908 |
| GO SPLICEOSOMAL TRI SNRNP COMPLEX                                                                               | 26  | 0.6921   | 1.785719 | 0.011152 | 0.026813 |
| GO PML BODY                                                                                                     | 93  | 0.43213  | 1.785645 | 0.002045 | 0.026767 |
| GO NEGATIVE REGULATION OF TRANSFERASE ACTIVITY                                                                  | 338 | 0.369541 | 1.785518 | <0.0001  | 0.026743 |
| GO RIBOSOME BINDING                                                                                             | 43  | 0.517325 | 1.785451 | 0.007767 | 0.026704 |
| GO NUCLEOID                                                                                                     | 39  | 0.64205  | 1.785446 | 0.009862 | 0.026651 |
| GO ANTIGEN PROCESSING AND PRESENTATION OF PEPTIDE ANTIGEN                                                       | 168 | 0.463126 | 1.784093 | 0.011696 | 0.027001 |
| GO NON RECOMBINATIONAL REPAIR                                                                                   | 65  | 0.560959 | 1.782272 | 0.001972 | 0.027433 |
| GO 90S PRERIBOSOME                                                                                              | 23  | 0.699412 | 1.782138 | 0.004024 | 0.027407 |
| GO MODULATION BY VIRUS OF HOST MORPHOLOGY OR PHYSIOLOGY                                                         | 36  | 0.498314 | 1.781727 | 0.009901 | 0.027443 |
| GO N ACETYLTRANSFERASE ACTIVITY                                                                                 | 76  | 0.469711 | 1.781422 | 0.014113 | 0.027461 |
| GO COP9 SIGNALOSOME                                                                                             | 31  | 0.516426 | 1.781354 | 0.001976 | 0.027417 |
| GO CELL DIFFERENTIATION INVOLVED IN EMBRYONIC PLACENTA DEVELOPMENT                                              | 25  | 0.574574 | 1.779166 | 0.006012 | 0.027972 |
| GO REGULATION OF CELLULAR SENESCENCE                                                                            | 26  | 0.536263 | 1.778809 | 0.01     | 0.028033 |
| GO POSITIVE REGULATION OF RNA SPLICING                                                                          | 22  | 0.60193  | 1.777157 | 0.005758 | 0.028425 |
| GO RESPONSE TO RADIATION                                                                                        | 387 | 0.355978 | 1.776967 | <0.0001  | 0.028423 |
| GO ADP METABOLIC PROCESS                                                                                        | 43  | 0.527682 | 1.776176 | 0.007767 | 0.028583 |
| GO U4 U6 X U5 TRI SNRNP COMPLEX                                                                                 | 21  | 0.680872 | 1.776172 | 0.007463 | 0.028527 |
| GO ANDROGEN RECEPTOR SIGNALING PATHWAY                                                                          | 40  | 0.510841 | 1.775865 | 0.007952 | 0.02857  |

|                                                                                                                                                                                                  |     |          |          |          |          |
|--------------------------------------------------------------------------------------------------------------------------------------------------------------------------------------------------|-----|----------|----------|----------|----------|
| GO SNORNA BINDING                                                                                                                                                                                | 25  | 0.634217 | 1.775397 | 0.011385 | 0.028657 |
| GO LAMIN BINDING                                                                                                                                                                                 | 17  | 0.563097 | 1.775094 | 0.002037 | 0.028671 |
| GO ANATOMICAL STRUCTURE HOMEOSTASIS                                                                                                                                                              | 263 | 0.370103 | 1.774474 | <0.0001  | 0.028786 |
| GO NEGATIVE REGULATION OF DNA RECOMBINATION                                                                                                                                                      | 15  | 0.620471 | 1.77135  | 0.017682 | 0.029598 |
| GO HISTONE MONOUBIQUITINATION                                                                                                                                                                    | 23  | 0.599946 | 1.770855 | 0.01232  | 0.029688 |
| GO REGULATION OF CELLULAR AMIDE METABOLIC PROCESS                                                                                                                                                | 321 | 0.391898 | 1.770379 | 0.003883 | 0.029744 |
| GO HISTONE H4 ACETYLATION                                                                                                                                                                        | 42  | 0.510152 | 1.769717 | 0.00998  | 0.029875 |
| GO TRANSCRIPTIONALLY ACTIVE CHROMATIN                                                                                                                                                            | 16  | 0.586567 | 1.769639 | 0.008065 | 0.029831 |
| GO NUCLEAR TRANSCRIPTIONAL REPRESSOR COMPLEX                                                                                                                                                     | 22  | 0.6081   | 1.768906 | 0.014228 | 0.030008 |
| GO NEGATIVE REGULATION OF WNT SIGNALING PATHWAY                                                                                                                                                  | 188 | 0.404768 | 1.768722 | <0.0001  | 0.030006 |
| GO SMN SM PROTEIN COMPLEX                                                                                                                                                                        | 17  | 0.760889 | 1.768103 | 0.007576 | 0.030106 |
| GO SPLICEOSOMAL COMPLEX ASSEMBLY                                                                                                                                                                 | 52  | 0.568863 | 1.767511 | 0.019881 | 0.030203 |
| GO TRANSLATION INITIATION FACTOR ACTIVITY                                                                                                                                                        | 49  | 0.592538 | 1.766117 | 0.013699 | 0.030498 |
| GO PROTEIN TRANSPORTER ACTIVITY                                                                                                                                                                  | 96  | 0.44282  | 1.766077 | 0.001869 | 0.030451 |
| GO ALPHA AMINO ACID BIOSYNTHETIC PROCESS                                                                                                                                                         | 73  | 0.507317 | 1.765848 | 0.005917 | 0.030457 |
| GO DNA BINDING BENDING                                                                                                                                                                           | 19  | 0.593276 | 1.765707 | 0.009921 | 0.030432 |
| GO PRE MRNA BINDING                                                                                                                                                                              | 24  | 0.589549 | 1.763815 | 0.011583 | 0.030949 |
| GO REGULATION OF HISTONE H3 K4 METHYLATION                                                                                                                                                       | 24  | 0.587954 | 1.762308 | 0.006061 | 0.031317 |
| GO INTERCELLULAR BRIDGE                                                                                                                                                                          | 40  | 0.484845 | 1.761994 | 0.003876 | 0.03133  |
| GO ENDORIBONUCLEASE ACTIVITY                                                                                                                                                                     | 45  | 0.508261 | 1.761933 | 0.011429 | 0.031288 |
| GO PROTEIN STABILIZATION                                                                                                                                                                         | 125 | 0.388647 | 1.761525 | <0.0001  | 0.031345 |
| GO MRNA CLEAVAGE                                                                                                                                                                                 | 17  | 0.610367 | 1.760144 | 0.00994  | 0.031674 |
| GO REGULATION OF DNA BINDING                                                                                                                                                                     | 92  | 0.421076 | 1.760069 | 0.003831 | 0.031635 |
| GO POSITIVE REGULATION OF VIRAL PROCESS                                                                                                                                                          | 84  | 0.443727 | 1.758816 | 0.005825 | 0.031967 |
| GO PYRUVATE METABOLIC PROCESS                                                                                                                                                                    | 59  | 0.507873 | 1.758614 | 0.003992 | 0.031977 |
| GO REGULATION OF ESTABLISHMENT OF PROTEIN LOCALIZATION TO MITOCHONDRION                                                                                                                          | 120 | 0.396043 | 1.758491 | 0.001942 | 0.031949 |
| GO DNA DAMAGE RESPONSE SIGNAL TRANSDUCTION RESULTING IN TRANSCRIPTION                                                                                                                            | 15  | 0.611815 | 1.757968 | 0.009881 | 0.032038 |
| GO INNER MITOCHONDRIAL MEMBRANE ORGANIZATION                                                                                                                                                     | 16  | 0.709256 | 1.756585 | 0.005769 | 0.032363 |
| GO OXIDOREDUCTASE ACTIVITY ACTING ON PAIRED DONORS WITH INCORPORATION OR REDUCTION OF MOLECULAR OXYGEN 2 OXOGLUTARATE AS ONE DONOR AND INCORPORATION OF ONE ATOM EACH OF OXYGEN INTO BOTH DONORS | 38  | 0.504523 | 1.755409 | 0.00759  | 0.032635 |
| GO MATURATION OF SSU RRNA                                                                                                                                                                        | 40  | 0.637143 | 1.754643 | 0.011952 | 0.032814 |
| GO ERROR PRONE TRANSLESION SYNTHESIS                                                                                                                                                             | 19  | 0.663224 | 1.754094 | 0.01     | 0.03295  |
| GO RIBOSOME BIOGENESIS                                                                                                                                                                           | 291 | 0.57683  | 1.753271 | 0.027397 | 0.033169 |
| GO CELLULAR PROTEIN COMPLEX DISASSEMBLY                                                                                                                                                          | 119 | 0.581849 | 1.752879 | 0.016854 | 0.033229 |

|                                                                                                        |     |          |          |          |          |
|--------------------------------------------------------------------------------------------------------|-----|----------|----------|----------|----------|
| GO CELLULAR PROTEIN COMPLEX LOCALIZATION                                                               | 21  | 0.556525 | 1.752391 | 0.002024 | 0.033288 |
| GO REGULATION OF MITOCHONDRIAL OUTER MEMBRANE PERMEABILIZATION INVOLVED IN APOPTOTIC SIGNALING PATHWAY | 42  | 0.516347 | 1.752106 | 0.011742 | 0.033303 |
| GO REGULATION OF CHROMATIN ORGANIZATION                                                                | 146 | 0.410053 | 1.749097 | 0.004149 | 0.034128 |
| GO REGULATION OF SPINDLE ORGANIZATION                                                                  | 19  | 0.604458 | 1.748916 | 0.005859 | 0.03412  |
| GO CELLULAR COMPONENT DISASSEMBLY INVOLVED IN EXECUTION PHASE OF APOPTOSIS                             | 41  | 0.47874  | 1.748094 | 0.007843 | 0.034321 |
| GO CYCLIN DEPENDENT PROTEIN KINASE ACTIVITY                                                            | 34  | 0.48956  | 1.747861 | 0.008147 | 0.034328 |
| GO TRANSLATION FACTOR ACTIVITY RNA BINDING                                                             | 83  | 0.515768 | 1.747599 | 0.013699 | 0.034332 |
| GO POSITIVE REGULATION OF HISTONE METHYLATION                                                          | 29  | 0.563912 | 1.747438 | 0.010438 | 0.034325 |
| GO SAGA TYPE COMPLEX                                                                                   | 30  | 0.548733 | 1.746721 | 0.020619 | 0.03452  |
| GO U12 TYPE SPLICEOSOMAL COMPLEX                                                                       | 25  | 0.638336 | 1.743014 | 0.011257 | 0.035607 |
| GO MICROTUBULE MOTOR ACTIVITY                                                                          | 75  | 0.515    | 1.742868 | 0.01     | 0.035583 |
| GO RNA CAPPING                                                                                         | 34  | 0.593204 | 1.742614 | 0.011765 | 0.035599 |
| GO REGULATION OF CELL MATURATION                                                                       | 18  | 0.579568 | 1.74233  | 0.003992 | 0.035619 |
| GO TELOMERE MAINTENANCE VIA TELOMERE LENGTHENING                                                       | 24  | 0.541373 | 1.741705 | 0.00956  | 0.035781 |
| GO NUCLEAR CYCLIN DEPENDENT PROTEIN KINASE HOLOENZYME COMPLEX                                          | 15  | 0.632289 | 1.74064  | 0.017176 | 0.036057 |
| GO RNA MODIFICATION                                                                                    | 106 | 0.478273 | 1.738686 | 0.009653 | 0.036591 |
| GO SYNAPSIS                                                                                            | 28  | 0.566083 | 1.738236 | 0.018293 | 0.036635 |
| GO CENTRIOLE ASSEMBLY                                                                                  | 18  | 0.641218 | 1.736683 | 0.026531 | 0.037114 |
| GO MITOCHONDRIAL TRANSLATION                                                                           | 104 | 0.643529 | 1.736309 | 0.018727 | 0.037163 |
| GO SERINE FAMILY AMINO ACID METABOLIC PROCESS                                                          | 38  | 0.55112  | 1.735618 | 0.00996  | 0.037323 |
| GO CHD TYPE COMPLEX                                                                                    | 17  | 0.634161 | 1.735196 | 0.016563 | 0.0374   |
| GO LEUKOCYTE APOPTOTIC PROCESS                                                                         | 22  | 0.562818 | 1.73479  | 0.013972 | 0.037485 |
| GO POSITIVE REGULATION OF VIRAL TRANSCRIPTION                                                          | 35  | 0.52485  | 1.733455 | 0.005964 | 0.037787 |
| GO NEGATIVE REGULATION OF HISTONE ACETYLATION                                                          | 15  | 0.571299 | 1.733101 | 0.001946 | 0.037849 |
| GO U5 SNRNP                                                                                            | 16  | 0.698427 | 1.729112 | 0.013258 | 0.039131 |
| GO 3 5 EXONUCLEASE ACTIVITY                                                                            | 44  | 0.495525 | 1.729045 | 0.009921 | 0.039076 |
| GO ORGANELLE LOCALIZATION                                                                              | 393 | 0.358321 | 1.72892  | 0.001972 | 0.03905  |
| GO CELLULAR SENESCENCE                                                                                 | 32  | 0.496093 | 1.728465 | 0.007648 | 0.039148 |
| GO CORE PROMOTER BINDING                                                                               | 146 | 0.415237 | 1.727529 | <0.0001  | 0.039366 |
| GO CLEAVAGE INVOLVED IN RRNA PROCESSING                                                                | 19  | 0.667942 | 1.726465 | 0.020913 | 0.039667 |
| GO NUCLEAR SPECK                                                                                       | 188 | 0.425684 | 1.726369 | 0.010204 | 0.039648 |
| GO PURINE CONTAINING COMPOUND SALVAGE                                                                  | 15  | 0.629299 | 1.723825 | 0.007921 | 0.04049  |
| GO NEGATIVE REGULATION OF DNA BIOSYNTHETIC PROCESS                                                     | 30  | 0.507658 | 1.723285 | 0.003802 | 0.040628 |
| GO ESTABLISHMENT OF SPINDLE ORIENTATION                                                                | 24  | 0.561364 | 1.723172 | 0.01006  | 0.040582 |
| GO MATURATION OF SSU RRNA FROM                                                                         | 33  | 0.647246 | 1.722893 | 0.011811 | 0.040592 |



|                                                                                          |     |          |          |          |          |
|------------------------------------------------------------------------------------------|-----|----------|----------|----------|----------|
| TRICISTRONIC RNA TRANSCRIPT SSU RRNA 5<br>8S RRNA LSU RRNA                               |     |          |          |          |          |
| GO GENE SILENCING BY RNA                                                                 | 128 | 0.506453 | 1.722662 | 0.005848 | 0.040615 |
| GO POSITIVE REGULATION OF MRNA<br>METABOLIC PROCESS                                      | 42  | 0.496455 | 1.722021 | 0.015595 | 0.040786 |
| GO NEGATIVE REGULATION OF CELL AGING                                                     | 16  | 0.589029 | 1.72193  | 0.016327 | 0.040733 |
| GO RNA CATABOLIC PROCESS                                                                 | 17  | 0.592204 | 1.721746 | 0.005703 | 0.040723 |
| GO POSITIVE REGULATION OF G1 S TRANSITION<br>OF MITOTIC CELL CYCLE                       | 24  | 0.532542 | 1.720903 | 0.004107 | 0.040983 |
| GO TELOMERIC DNA BINDING                                                                 | 28  | 0.552674 | 1.720847 | 0.016194 | 0.040934 |
| GO CHROMATIN DNA BINDING                                                                 | 76  | 0.465146 | 1.720238 | 0.005952 | 0.041077 |
| GO SYNAPTONEMAL COMPLEX ORGANIZATION                                                     | 18  | 0.605239 | 1.718469 | 0.008163 | 0.041648 |
| GO KINESIN BINDING                                                                       | 30  | 0.533011 | 1.716106 | 0.010638 | 0.042486 |
| GO REGULATION OF TRANSCRIPTION FROM RNA<br>POLYMERASE III PROMOTER                       | 20  | 0.532314 | 1.715872 | 0.01417  | 0.042494 |
| GO HISTONE DEACETYLASE COMPLEX                                                           | 60  | 0.462378 | 1.714075 | 0.012146 | 0.043039 |
| GO NUCLEOSIDE MONOPHOSPHATE<br>BIOSYNTHETIC PROCESS                                      | 77  | 0.527563 | 1.713836 | 0.025    | 0.043073 |
| GO HEXOSE CATABOLIC PROCESS                                                              | 45  | 0.499639 | 1.713806 | 0.00996  | 0.043004 |
| GO PHOSPHATASE COMPLEX                                                                   | 43  | 0.494423 | 1.712841 | 0.016032 | 0.04327  |
| GO NUCLEAR ENVELOPE REASSEMBLY                                                           | 17  | 0.635974 | 1.711194 | 0.018622 | 0.043803 |
| GO REGULATION OF DNA METHYLATION                                                         | 15  | 0.630775 | 1.71077  | 0.024845 | 0.043885 |
| GO REGULATION OF RNA SPLICING                                                            | 92  | 0.468227 | 1.710524 | 0.014056 | 0.04389  |
| GO POLYSOME                                                                              | 38  | 0.537478 | 1.710226 | 0.019685 | 0.043913 |
| GO POSITIVE REGULATION OF TRANSCRIPTION<br>INITIATION FROM RNA POLYMERASE II<br>PROMOTER | 17  | 0.56806  | 1.709138 | 0.023483 | 0.04422  |
| GO PYRIMIDINE NUCLEOBASE METABOLIC<br>PROCESS                                            | 19  | 0.540008 | 1.708514 | 0.021526 | 0.044372 |
| GO LIGAND DEPENDENT NUCLEAR RECEPTOR<br>TRANSCRIPTION COACTIVATOR ACTIVITY               | 51  | 0.456405 | 1.708426 | 0.008282 | 0.044323 |
| GO POSITIVE REGULATION OF DNA TEMPLATED<br>TRANSCRIPTION INITIATION                      | 24  | 0.522703 | 1.702956 | 0.004065 | 0.046361 |
| GO FOLIC ACID METABOLIC PROCESS                                                          | 17  | 0.60177  | 1.702791 | 0.017682 | 0.046352 |
| GO HISTONE BINDING                                                                       | 164 | 0.466658 | 1.701842 | 0.019763 | 0.046642 |
| GO DNA CATABOLIC PROCESS                                                                 | 26  | 0.518235 | 1.700556 | 0.013592 | 0.047046 |
| GO GENE SILENCING                                                                        | 183 | 0.477833 | 1.699997 | 0.009634 | 0.047162 |
| GO CIS TRANS ISOMERASE ACTIVITY                                                          | 40  | 0.503891 | 1.699777 | 0.015504 | 0.047158 |
| GO PROTEIN ACYLATION                                                                     | 142 | 0.391229 | 1.699103 | 0.006098 | 0.047382 |
| GO METHYL CPG BINDING                                                                    | 15  | 0.597263 | 1.698379 | 0.02008  | 0.047593 |
| GO CELLULAR RESPONSE TO ESTROGEN<br>STIMULUS                                             | 38  | 0.470614 | 1.697993 | 0.010246 | 0.047639 |
| GO ORGANELLAR RIBOSOME                                                                   | 67  | 0.681921 | 1.695575 | 0.015066 | 0.048515 |
| GO U2 SNRNP                                                                              | 18  | 0.683132 | 1.694866 | 0.005693 | 0.048688 |
| GO HSP90 PROTEIN BINDING                                                                 | 27  | 0.474152 | 1.694405 | 0.006198 | 0.048791 |
| GO TRANSCRIPTION FROM RNA POLYMERASE I<br>PROMOTER                                       | 34  | 0.542907 | 1.694311 | 0.025743 | 0.04874  |
| GO RNA PHOSPHODIESTER BOND HYDROLYSIS<br>ENDONUCLEOLYTIC                                 | 54  | 0.497476 | 1.693867 | 0.021236 | 0.048824 |

|                                                                                          |     |          |          |          |          |
|------------------------------------------------------------------------------------------|-----|----------|----------|----------|----------|
| GO TBP CLASS PROTEIN BINDING                                                             | 20  | 0.586022 | 1.693753 | 0.034156 | 0.048781 |
| GO TRANSCRIPTION FACTOR TFIID COMPLEX                                                    | 23  | 0.561859 | 1.69373  | 0.021696 | 0.04871  |
| GO PEPTIDYL PROLINE MODIFICATION                                                         | 48  | 0.485264 | 1.692788 | 0.02277  | 0.049016 |
| GO OXIDOREDUCTION COENZYME METABOLIC PROCESS                                             | 96  | 0.466445 | 1.692131 | 0.011583 | 0.049205 |
| GO WIDE PORE CHANNEL ACTIVITY                                                            | 22  | 0.545168 | 1.691139 | 0.014141 | 0.049528 |
| GO REGULATION OF PROTEIN PHOSPHATASE TYPE 2A ACTIVITY                                    | 23  | 0.546205 | 1.689474 | 0.011976 | 0.050173 |
| GO TRANSCRIPTION FROM RNA POLYMERASE III PROMOTER                                        | 38  | 0.513218 | 1.688685 | 0.011742 | 0.050413 |
| GO NUCLEOSIDE PHOSPHATE BIOSYNTHETIC PROCESS                                             | 173 | 0.409357 | 1.688497 | 0.011342 | 0.050411 |
| GO RIBONUCLEASE ACTIVITY                                                                 | 86  | 0.448288 | 1.68822  | 0.015385 | 0.050443 |
| GO POSITIVE REGULATION OF MRNA PROCESSING                                                | 30  | 0.538175 | 1.687735 | 0.013672 | 0.050552 |
| GO RESPONSE TO PLATELET DERIVED GROWTH FACTOR                                            | 18  | 0.581284 | 1.687597 | 0.018987 | 0.050532 |
| GO REGULATION OF MEMBRANE PERMEABILITY                                                   | 69  | 0.455242 | 1.686723 | 0.015414 | 0.050798 |
| GO LYMPHOCYTE APOPTOTIC PROCESS                                                          | 18  | 0.581486 | 1.684565 | 0.011858 | 0.051621 |
| GO CELLULAR RESPONSE TO LIGHT STIMULUS                                                   | 86  | 0.399763 | 1.68314  | <0.0001  | 0.052121 |
| GO REGULATION OF GENE SILENCING                                                          | 50  | 0.535209 | 1.682743 | 0.024    | 0.052213 |
| GO DNA MODIFICATION                                                                      | 76  | 0.428374 | 1.682699 | 0.006    | 0.052143 |
| GO CELLULAR RESPONSE TO ESTRADIOL STIMULUS                                               | 28  | 0.512328 | 1.681776 | 0.018789 | 0.052427 |
| GO POSITIVE REGULATION OF CHROMATIN MODIFICATION                                         | 81  | 0.425047 | 1.681599 | 0.014228 | 0.052426 |
| GO OXIDOREDUCTASE ACTIVITY ACTING ON THE CH NH GROUP OF DONORS NAD OR NADP AS ACCEPTOR   | 16  | 0.57087  | 1.680074 | 0.009416 | 0.052936 |
| GO HYDROLASE ACTIVITY ACTING ON CARBON NITROGEN BUT NOT PEPTIDE BONDS IN CYCLIC AMIDINES | 32  | 0.513639 | 1.677474 | 0.016293 | 0.054    |
| GO FC RECEPTOR SIGNALING PATHWAY                                                         | 182 | 0.411705 | 1.676753 | 0.016097 | 0.054226 |
| GO DEOXYRIBONUCLEOTIDE METABOLIC PROCESS                                                 | 33  | 0.564834 | 1.676717 | 0.021236 | 0.054148 |
| GO PTERIDINE CONTAINING COMPOUND METABOLIC PROCESS                                       | 34  | 0.530631 | 1.675928 | 0.021154 | 0.05438  |
| GO GLUCOSE 6 PHOSPHATE METABOLIC PROCESS                                                 | 21  | 0.603802 | 1.675761 | 0.019531 | 0.054379 |
| GO TRANSCRIPTION FACTOR COMPLEX                                                          | 288 | 0.360187 | 1.673812 | 0.008147 | 0.055176 |
| GO REGULATION OF INCLUSION BODY ASSEMBLY                                                 | 15  | 0.596258 | 1.672564 | 0.02947  | 0.055571 |
| GO EXECUTION PHASE OF APOPTOSIS                                                          | 53  | 0.428766 | 1.671464 | 0.013566 | 0.055977 |
| GO POSITIVE REGULATION OF TELOMERE CAPPING                                               | 15  | 0.577003 | 1.67096  | 0.014344 | 0.056108 |
| GO PRODUCTION OF MOLECULAR MEDIATOR OF IMMUNE RESPONSE                                   | 57  | 0.435461 | 1.670808 | 0.022774 | 0.056077 |
| GO REGULATION OF MAMMARY GLAND EPITHELIAL CELL PROLIFERATION                             | 16  | 0.567529 | 1.670716 | 0.022541 | 0.056018 |

|                                                              |     |          |          |          |          |
|--------------------------------------------------------------|-----|----------|----------|----------|----------|
| GO TRANSCRIPTION ELONGATION FACTOR COMPLEX                   | 36  | 0.493055 | 1.670185 | 0.015968 | 0.05619  |
| GO REGULATION OF GENE EXPRESSION EPIGENETIC                  | 202 | 0.447421 | 1.669014 | 0.015385 | 0.05658  |
| GO PEPTIDE N ACETYLTRANSFERASE ACTIVITY                      | 58  | 0.465171 | 1.668373 | 0.026694 | 0.056792 |
| GO POSITIVE REGULATION OF MULTI ORGANISM PROCESS             | 141 | 0.365866 | 1.666851 | 0.001969 | 0.057374 |
| GO ESTABLISHMENT OF MITOTIC SPINDLE ORIENTATION              | 19  | 0.559218 | 1.666112 | 0.01996  | 0.057598 |
| GO METAL CLUSTER BINDING                                     | 60  | 0.491805 | 1.665482 | 0.026465 | 0.057755 |
| GO MYELIN SHEATH                                             | 162 | 0.418921 | 1.66524  | 0.024436 | 0.057762 |
| GO DSRNA FRAGMENTATION                                       | 18  | 0.612578 | 1.665107 | 0.018367 | 0.057739 |
| GO PROTEIN DISULFIDE OXIDOREDUCTASE ACTIVITY                 | 20  | 0.606465 | 1.664539 | 0.017578 | 0.057921 |
| GO NEURAL NUCLEUS DEVELOPMENT                                | 65  | 0.446619 | 1.663791 | 0.017578 | 0.058086 |
| GO SPERMATID NUCLEUS DIFFERENTIATION                         | 15  | 0.573277 | 1.662565 | 0.019802 | 0.058532 |
| GO MITOCHONDRIAL TRANSPORT                                   | 161 | 0.463655 | 1.662056 | 0.024715 | 0.058674 |
| GO NEGATIVE REGULATION OF BINDING                            | 129 | 0.370602 | 1.661501 | 0.007952 | 0.058702 |
| GO TRANSLATION INITIATION FACTOR BINDING                     | 27  | 0.540381 | 1.661247 | 0.02729  | 0.058729 |
| GO ALDITOL METABOLIC PROCESS                                 | 18  | 0.608004 | 1.659982 | 0.012    | 0.05916  |
| GO PROTEIN KINASE C BINDING                                  | 47  | 0.438978 | 1.659957 | 0.014085 | 0.059083 |
| GO REGULATION OF RECEPTOR BIOSYNTHETIC PROCESS               | 21  | 0.524381 | 1.659122 | 0.013158 | 0.059383 |
| GO INCLUSION BODY                                            | 65  | 0.40347  | 1.657149 | 0.004149 | 0.060225 |
| GO REGULATION OF CELLULAR KETONE METABOLIC PROCESS           | 165 | 0.403671 | 1.657123 | 0.013359 | 0.060143 |
| GO LIGASE ACTIVITY FORMING CARBON NITROGEN BONDS             | 52  | 0.48172  | 1.65638  | 0.028455 | 0.060397 |
| GO REGULATION OF HISTONE METHYLATION                         | 51  | 0.491171 | 1.65499  | 0.016393 | 0.060994 |
| GO GMP METABOLIC PROCESS                                     | 20  | 0.51321  | 1.654619 | 0.035294 | 0.061082 |
| GO MONOSACCHARIDE BIOSYNTHETIC PROCESS                       | 53  | 0.517522 | 1.654188 | 0.019417 | 0.061217 |
| GO ENDORIBONUCLEASE COMPLEX                                  | 17  | 0.616894 | 1.653271 | 0.025341 | 0.06159  |
| GO TUMOR NECROSIS FACTOR MEDIATED SIGNALING PATHWAY          | 115 | 0.462006 | 1.652967 | 0.042424 | 0.061642 |
| GO RNA POLYMERASE II CARBOXY TERMINAL DOMAIN KINASE ACTIVITY | 16  | 0.59807  | 1.652402 | 0.022267 | 0.061827 |
| GO POSITIVE REGULATION OF MITOCHONDRION ORGANIZATION         | 151 | 0.380845 | 1.651029 | 0.004008 | 0.062374 |
| GO POSITIVE REGULATION OF CATABOLIC PROCESS                  | 383 | 0.336586 | 1.650862 | <0.0001  | 0.06235  |
| GO DNA DEMETHYLATION                                         | 15  | 0.590871 | 1.65064  | 0.017751 | 0.062366 |
| GO POSITIVE REGULATION OF ATPASE ACTIVITY                    | 41  | 0.43714  | 1.650074 | 0.014706 | 0.062524 |
| GO PROTEIN MODIFICATION BY SMALL PROTEIN REMOVAL             | 107 | 0.412615 | 1.649666 | 0.018405 | 0.062613 |
| GO BASAL TRANSCRIPTION MACHINERY BINDING                     | 23  | 0.548269 | 1.64924  | 0.03854  | 0.062735 |
| GO TOR SIGNALING                                             | 16  | 0.553122 | 1.648578 | 0.014199 | 0.062953 |
| GO CEREBRAL CORTEX DEVELOPMENT                               | 103 | 0.415328 | 1.64722  | 0.012146 | 0.063532 |

|                                                                       |     |          |          |          |          |
|-----------------------------------------------------------------------|-----|----------|----------|----------|----------|
| GO IN UTERO EMBRYONIC DEVELOPMENT                                     | 301 | 0.34625  | 1.646532 | <0.0001  | 0.063782 |
| GO U2 TYPE SPLICEOSOMAL COMPLEX                                       | 29  | 0.560377 | 1.644315 | 0.034091 | 0.064693 |
| GO OOCYTE DIFFERENTIATION                                             | 34  | 0.473364 | 1.643449 | 0.016293 | 0.065006 |
| GO REGULATION OF TELOMERE CAPPING                                     | 21  | 0.527403 | 1.64276  | 0.036437 | 0.065256 |
| GO RESPONSE TO GONADOTROPIN                                           | 26  | 0.508489 | 1.642164 | 0.022403 | 0.065436 |
| GO MITOCHONDRIAL GENOME MAINTENANCE                                   | 20  | 0.53105  | 1.640402 | 0.027944 | 0.066249 |
| GO NEGATIVE REGULATION OF CELLULAR CATABOLIC PROCESS                  | 148 | 0.353495 | 1.638954 | 0.004024 | 0.066894 |
| GO P53 BINDING                                                        | 66  | 0.412291 | 1.638522 | 0.028747 | 0.067    |
| GO MRNA 3 UTR BINDING                                                 | 47  | 0.469897 | 1.6383   | 0.033597 | 0.06701  |
| GO LIGASE ACTIVITY                                                    | 375 | 0.350899 | 1.636973 | 0.006148 | 0.067521 |
| GO PEPTIDYL SERINE MODIFICATION                                       | 146 | 0.372985 | 1.634924 | 0.008316 | 0.068456 |
| GO DNA CATABOLIC PROCESS<br>ENDONUCLEOLYTIC                           | 18  | 0.535096 | 1.630765 | 0.019608 | 0.070494 |
| GO WNT SIGNALING PATHWAY                                              | 333 | 0.344627 | 1.630277 | <0.0001  | 0.070664 |
| GO PYRIMIDINE DEOXYRIBONUCLEOTIDE<br>METABOLIC PROCESS                | 16  | 0.6085   | 1.62951  | 0.034221 | 0.070946 |
| GO ANATOMICAL STRUCTURE ARRANGEMENT                                   | 17  | 0.572347 | 1.628204 | 0.030181 | 0.071535 |
| GO RIBONUCLEOSIDE DIPHOSPHATE<br>METABOLIC PROCESS                    | 60  | 0.436003 | 1.628064 | 0.017928 | 0.071484 |
| GO CYTOPLASMIC TRANSLATION                                            | 40  | 0.649451 | 1.627425 | 0.034286 | 0.071754 |
| GO OOGENESIS                                                          | 57  | 0.422513 | 1.626383 | 0.010309 | 0.072198 |
| GO T CELL APOPTOTIC PROCESS                                           | 15  | 0.592985 | 1.625035 | 0.019685 | 0.072826 |
| GO MODULATION BY SYMBIONT OF HOST<br>CELLULAR PROCESS                 | 27  | 0.487881 | 1.623172 | 0.028169 | 0.073661 |
| GO MICROTUBULE BASED MOVEMENT                                         | 192 | 0.408164 | 1.622977 | 0.044177 | 0.073662 |
| GO PROTEIN C TERMINUS BINDING                                         | 182 | 0.344404 | 1.620037 | <0.0001  | 0.07512  |
| GO CHAPERONE BINDING                                                  | 77  | 0.435938 | 1.619727 | 0.016514 | 0.075193 |
| GO APOPTOTIC DNA FRAGMENTATION                                        | 15  | 0.561805 | 1.61957  | 0.02544  | 0.075158 |
| GO PROTEIN PHOSPHATASE TYPE 2A COMPLEX                                | 19  | 0.537858 | 1.619463 | 0.025591 | 0.075108 |
| GO RIBOSOMAL LARGE SUBUNIT BIOGENESIS                                 | 48  | 0.61894  | 1.619308 | 0.043651 | 0.075087 |
| GO RNA POLYMERASE II DISTAL ENHANCER<br>SEQUENCE SPECIFIC DNA BINDING | 61  | 0.436756 | 1.618387 | 0.018443 | 0.075505 |
| GO N TERMINAL PROTEIN AMINO ACID<br>MODIFICATION                      | 24  | 0.489485 | 1.617354 | 0.030242 | 0.075956 |
| GO ORGANELLE DISASSEMBLY                                              | 174 | 0.353527 | 1.616933 | 0.00578  | 0.076098 |
| GO UBIQUITIN LIKE PROTEIN LIGASE ACTIVITY                             | 188 | 0.369695 | 1.616615 | 0.016097 | 0.076139 |
| GO POSITIVE REGULATION OF TYPE I<br>INTERFERON PRODUCTION             | 69  | 0.400754 | 1.616344 | 0.01227  | 0.07619  |
| GO MAGNESIUM ION BINDING                                              | 188 | 0.344687 | 1.61516  | 0.002    | 0.076742 |
| GO ORGANELLAR SMALL RIBOSOMAL SUBUNIT                                 | 25  | 0.684953 | 1.614828 | 0.034549 | 0.076835 |
| GO COPI COATED VESICLE MEMBRANE                                       | 16  | 0.656655 | 1.613695 | 0.026616 | 0.077376 |
| GO MONOSACCHARIDE CATABOLIC PROCESS                                   | 54  | 0.45749  | 1.611815 | 0.033138 | 0.078371 |
| GO TRNA SPECIFIC RIBONUCLEASE ACTIVITY                                | 16  | 0.649643 | 1.611021 | 0.037402 | 0.078691 |
| GO AGING                                                              | 256 | 0.335305 | 1.610464 | <0.0001  | 0.07891  |
| GO CELLULAR RESPONSE TO NITRIC OXIDE                                  | 15  | 0.525877 | 1.610183 | 0.027083 | 0.078959 |
| GO RNA PHOSPHODIESTER BOND HYDROLYSIS<br>EXONUCLEOLYTIC               | 33  | 0.501388 | 1.610019 | 0.03301  | 0.078941 |
| GO PROTEIN TARGETING TO MITOCHONDRION                                 | 46  | 0.559662 | 1.60927  | 0.048544 | 0.079309 |

|                                                                                  |     |          |          |          |          |
|----------------------------------------------------------------------------------|-----|----------|----------|----------|----------|
| GO ANTIGEN PROCESSING AND PRESENTATION                                           | 204 | 0.406144 | 1.608754 | 0.033597 | 0.07949  |
| GO DNA METHYLATION OR DEMETHYLATION                                              | 56  | 0.438784 | 1.606355 | 0.028169 | 0.080671 |
| GO MODIFICATION BY SYMBIONT OF HOST MORPHOLOGY OR PHYSIOLOGY                     | 44  | 0.451641 | 1.606206 | 0.029762 | 0.08064  |
| GO RIBOSOMAL SMALL SUBUNIT BIOGENESIS                                            | 54  | 0.592499 | 1.605881 | 0.049702 | 0.080732 |
| GO CELLULAR AMINO ACID BIOSYNTHETIC PROCESS                                      | 87  | 0.430164 | 1.605567 | 0.023715 | 0.080776 |
| GO REGULATION OF ATPASE ACTIVITY                                                 | 61  | 0.399178 | 1.603606 | 0.013359 | 0.081746 |
| GO ORGANELLE ASSEMBLY                                                            | 450 | 0.356074 | 1.603347 | 0.01848  | 0.081789 |
| GO RESPONSE TO TESTOSTERONE                                                      | 37  | 0.433258 | 1.603174 | 0.011976 | 0.081781 |
| GO AXON CYTOPLASM                                                                | 29  | 0.491822 | 1.601193 | 0.043651 | 0.082844 |
| GO REGULATION OF CANONICAL WNT SIGNALING PATHWAY                                 | 226 | 0.353632 | 1.601189 | 0.003976 | 0.08273  |
| GO NEGATIVE REGULATION OF ANOIKIS                                                | 17  | 0.565864 | 1.600332 | 0.036965 | 0.083124 |
| GO CYTOPLASMIC STRESS GRANULE                                                    | 31  | 0.516826 | 1.600083 | 0.045267 | 0.083154 |
| GO VOLTAGE GATED ANION CHANNEL ACTIVITY                                          | 17  | 0.547073 | 1.59969  | 0.039448 | 0.083243 |
| GO CELLULAR METABOLIC COMPOUND SALVAGE                                           | 35  | 0.489086 | 1.599407 | 0.031955 | 0.083265 |
| GO REGULATION OF PROTEIN TARGETING TO MITOCHONDRION                              | 90  | 0.365941 | 1.598721 | 0.004    | 0.083549 |
| GO CELL SEPARATION AFTER CYTOKINESIS                                             | 17  | 0.593548 | 1.59795  | 0.025292 | 0.083862 |
| GO NEGATIVE REGULATION OF DNA BINDING                                            | 46  | 0.43984  | 1.597227 | 0.016129 | 0.084157 |
| GO DNA REPLICATION FACTOR A COMPLEX                                              | 15  | 0.570212 | 1.596791 | 0.03956  | 0.084288 |
| GO FEMALE GAMETE GENERATION                                                      | 84  | 0.378973 | 1.595978 | 0.007952 | 0.084673 |
| GO NEGATIVE REGULATION OF GENE SILENCING                                         | 18  | 0.520446 | 1.595796 | 0.038    | 0.084659 |
| GO REGULATION OF RETINOIC ACID RECEPTOR SIGNALING PATHWAY                        | 16  | 0.546336 | 1.593853 | 0.021696 | 0.085647 |
| GO REGULATION OF VIRAL TRANSCRIPTION                                             | 57  | 0.419094 | 1.593598 | 0.021611 | 0.085695 |
| GO SINGLE FERTILIZATION                                                          | 92  | 0.384302 | 1.591925 | 0.01     | 0.086594 |
| GO NUCLEOTIDE PHOSPHORYLATION                                                    | 55  | 0.453622 | 1.588405 | 0.038241 | 0.088515 |
| GO NEGATIVE REGULATION OF PROTEIN BINDING                                        | 78  | 0.377476 | 1.587577 | 0.007859 | 0.08892  |
| GO 4 IRON 4 SULFUR CLUSTER BINDING                                               | 40  | 0.476705 | 1.587483 | 0.038986 | 0.088867 |
| GO REGULATION OF ORGAN MORPHOGENESIS                                             | 239 | 0.357287 | 1.587285 | 0.009862 | 0.088866 |
| GO RNA DEPENDENT DNA BIOSYNTHETIC PROCESS                                        | 20  | 0.507475 | 1.587176 | 0.038911 | 0.088815 |
| GO NCRNA CATABOLIC PROCESS                                                       | 22  | 0.54237  | 1.586006 | 0.040733 | 0.089415 |
| GO REGULATION OF MITOCHONDRION ORGANIZATION                                      | 197 | 0.354586 | 1.585613 | 0.015717 | 0.089516 |
| GO FORMATION OF TRANSLATION PREINITIATION COMPLEX                                | 20  | 0.646662 | 1.585039 | 0.048485 | 0.089749 |
| GO CHROMATIN DISASSEMBLY                                                         | 16  | 0.616777 | 1.584598 | 0.035294 | 0.089925 |
| GO IMMUNOGLOBULIN PRODUCTION INVOLVED IN IMMUNOGLOBULIN MEDIATED IMMUNE RESPONSE | 22  | 0.513419 | 1.583679 | 0.02863  | 0.090363 |
| GO MITOCHONDRION MORPHOGENESIS                                                   | 19  | 0.528813 | 1.581946 | 0.037109 | 0.091303 |
| GO ORGAN REGENERATION                                                            | 82  | 0.385603 | 1.581233 | 0.00818  | 0.091612 |

|                                                                                      |     |          |          |          |          |
|--------------------------------------------------------------------------------------|-----|----------|----------|----------|----------|
| GO U1 SNRNP                                                                          | 17  | 0.651018 | 1.578656 | 0.045714 | 0.093047 |
| GO CELL CYCLE ARREST                                                                 | 142 | 0.335921 | 1.577482 | 0.008    | 0.093682 |
| GO PROTEIN K48 LINKED UBIQUITINATION                                                 | 45  | 0.431925 | 1.576728 | 0.043912 | 0.09393  |
| GO MULTICELLULAR ORGANISM AGING                                                      | 30  | 0.430838 | 1.57631  | 0.014894 | 0.094061 |
| GO ISOMERASE ACTIVITY                                                                | 145 | 0.399605 | 1.576192 | 0.023077 | 0.094005 |
| GO TOXIN TRANSPORT                                                                   | 36  | 0.437997 | 1.574176 | 0.026769 | 0.095017 |
| GO ORGANELLE TRANSPORT ALONG<br>MICROTUBULE                                          | 54  | 0.434525 | 1.571645 | 0.046122 | 0.096377 |
| GO ADENYLYLTRANSFERASE ACTIVITY                                                      | 24  | 0.487662 | 1.570051 | 0.03272  | 0.097272 |
| GO HORMONE RECEPTOR BINDING                                                          | 146 | 0.351538 | 1.56702  | 0.012245 | 0.099135 |
| GO ORGANELLAR LARGE RIBOSOMAL SUBUNIT                                                | 30  | 0.676304 | 1.566121 | 0.041276 | 0.099588 |
| GO INTRINSIC APOPTOTIC SIGNALING<br>PATHWAY                                          | 147 | 0.331058 | 1.564437 | 0.003817 | 0.10045  |
| GO UBIQUITIN LIGASE COMPLEX                                                          | 247 | 0.350641 | 1.560824 | 0.006186 | 0.10253  |
| GO MOTOR ACTIVITY                                                                    | 128 | 0.3998   | 1.560799 | 0.029106 | 0.102407 |
| GO OVARIAN FOLLICLE DEVELOPMENT                                                      | 55  | 0.388673 | 1.560636 | 0.022267 | 0.102387 |
| GO PROTEIN COMPLEX LOCALIZATION                                                      | 50  | 0.445916 | 1.5595   | 0.04918  | 0.102982 |
| GO TRNA METHYLATION                                                                  | 20  | 0.539546 | 1.557408 | 0.048263 | 0.104167 |
| GO CELLULAR AMINO ACID METABOLIC<br>PROCESS                                          | 313 | 0.374248 | 1.5558   | 0.034615 | 0.104976 |
| GO REGULATION OF PROTEIN STABILITY                                                   | 210 | 0.33289  | 1.55211  | 0.007519 | 0.107229 |
| GO PALLIUM DEVELOPMENT                                                               | 148 | 0.37243  | 1.55177  | 0.020325 | 0.10735  |
| GO METHYLATED HISTONE BINDING                                                        | 46  | 0.450217 | 1.551717 | 0.041667 | 0.107246 |
| GO PERICENTRIOLAR MATERIAL                                                           | 18  | 0.554791 | 1.550818 | 0.042463 | 0.10759  |
| GO NEGATIVE REGULATION OF CATABOLIC<br>PROCESS                                       | 193 | 0.317876 | 1.550531 | 0.006073 | 0.107636 |
| GO GLUTAMINE METABOLIC PROCESS                                                       | 22  | 0.510874 | 1.548629 | 0.047809 | 0.10875  |
| GO CELLULAR PROTEIN COMPLEX ASSEMBLY                                                 | 316 | 0.344701 | 1.547526 | 0.020833 | 0.109439 |
| GO INTRINSIC APOPTOTIC SIGNALING<br>PATHWAY IN RESPONSE TO DNA DAMAGE                | 70  | 0.370668 | 1.547403 | 0.013308 | 0.109238 |
| GO REGULATION OF MEIOTIC CELL CYCLE                                                  | 38  | 0.454363 | 1.546549 | 0.02459  | 0.109732 |
| GO GTPASE ACTIVITY                                                                   | 232 | 0.33265  | 1.540754 | 0.015748 | 0.113565 |
| GO DNA DEALKYLATION                                                                  | 20  | 0.509693 | 1.538393 | 0.043726 | 0.114972 |
| GO CELLULAR RESPONSE TO ALCOHOL                                                      | 110 | 0.36697  | 1.538208 | 0.010616 | 0.114967 |
| GO STRUCTURAL CONSTITUENT OF<br>CYTOSKELETON                                         | 94  | 0.391061 | 1.537746 | 0.021739 | 0.115147 |
| GO ADP BINDING                                                                       | 31  | 0.445913 | 1.537035 | 0.039095 | 0.115405 |
| GO NEGATIVE REGULATION OF PROTEIN<br>ACETYLATION                                     | 20  | 0.463792 | 1.533622 | 0.027076 | 0.117421 |
| GO CUL4 RING E3 UBIQUITIN LIGASE COMPLEX                                             | 25  | 0.503094 | 1.533315 | 0.047619 | 0.117497 |
| GO REGULATION OF WNT SIGNALING PATHWAY                                               | 295 | 0.323357 | 1.527464 | 0.007692 | 0.121369 |
| GO CELLULAR RESPONSE TO HYDROGEN<br>PEROXIDE                                         | 60  | 0.380988 | 1.522123 | 0.030242 | 0.123712 |
| GO EPHRIN RECEPTOR SIGNALING PATHWAY                                                 | 84  | 0.398783 | 1.521966 | 0.038911 | 0.123678 |
| GO SYMPATHETIC NERVOUS SYSTEM<br>DEVELOPMENT                                         | 21  | 0.530393 | 1.519317 | 0.040777 | 0.124965 |
| GO REGULATION OF DNA DAMAGE RESPONSE<br>SIGNAL TRANSDUCTION BY P53 CLASS<br>MEDIATOR | 27  | 0.460262 | 1.516521 | 0.048356 | 0.126768 |

|                                                                      |     |          |          |          |          |
|----------------------------------------------------------------------|-----|----------|----------|----------|----------|
| GO CHAPERONE MEDIATED PROTEIN FOLDING                                | 44  | 0.452848 | 1.515982 | 0.048507 | 0.127007 |
| GO REGULATION OF NUCLEOCYTOPLASMIC TRANSPORT                         | 214 | 0.316107 | 1.515561 | 0.010204 | 0.127185 |
| GO NEGATIVE REGULATION OF SIGNAL TRANSDUCTION BY P53 CLASS MEDIATOR  | 26  | 0.46519  | 1.515073 | 0.04466  | 0.127413 |
| GO PROTEIN SERINE THREONINE KINASE ACTIVITY                          | 425 | 0.313099 | 1.513725 | 0.014583 | 0.128296 |
| GO GLUCOSE METABOLIC PROCESS                                         | 113 | 0.383241 | 1.511774 | 0.021912 | 0.129662 |
| GO RESPONSE TO CAFFEINE                                              | 17  | 0.484744 | 1.506753 | 0.03854  | 0.133458 |
| GO NEURAL PRECURSOR CELL PROLIFERATION                               | 70  | 0.407592 | 1.506163 | 0.027601 | 0.133811 |
| GO NITROGEN COMPOUND TRANSPORT                                       | 476 | 0.307803 | 1.50589  | 0.00994  | 0.133853 |
| GO PYRIMIDINE CONTAINING COMPOUND METABOLIC PROCESS                  | 71  | 0.388283 | 1.505478 | 0.036822 | 0.133853 |
| GO MACROMOLECULE METHYLATION                                         | 171 | 0.360051 | 1.504799 | 0.031873 | 0.134234 |
| GO NEGATIVE REGULATION OF CELL CYCLE ARREST                          | 18  | 0.483197 | 1.503034 | 0.045714 | 0.135353 |
| GO CYTOPLASMIC MRNA PROCESSING BODY                                  | 62  | 0.396273 | 1.501981 | 0.029821 | 0.135858 |
| GO CULLIN RING UBIQUITIN LIGASE COMPLEX                              | 139 | 0.344329 | 1.50001  | 0.025948 | 0.137292 |
| GO PLACENTA DEVELOPMENT                                              | 134 | 0.338994 | 1.492943 | 0.02924  | 0.142299 |
| GO ENHANCER BINDING                                                  | 88  | 0.374882 | 1.488542 | 0.030364 | 0.144964 |
| GO REGULATION OF OXIDATIVE STRESS INDUCED CELL DEATH                 | 42  | 0.392337 | 1.487268 | 0.034483 | 0.145911 |
| GO MIDBRAIN DEVELOPMENT                                              | 86  | 0.367611 | 1.485432 | 0.025194 | 0.147109 |
| GO FERTILIZATION                                                     | 122 | 0.349028 | 1.485258 | 0.00625  | 0.147067 |
| GO PROTEIN PHOSPHATASE BINDING                                       | 117 | 0.332609 | 1.483928 | 0.022634 | 0.148021 |
| GO RESPONSE TO ESTRADIOL                                             | 143 | 0.320967 | 1.481185 | 0.016807 | 0.149502 |
| GO REGULATION OF PROTEIN LOCALIZATION TO NUCLEUS                     | 212 | 0.305467 | 1.48024  | 0.016495 | 0.150143 |
| GO TRANSCRIPTION INITIATION FROM RNA POLYMERASE II PROMOTER          | 152 | 0.317233 | 1.473564 | 0.028169 | 0.155008 |
| GO STEROID HORMONE RECEPTOR BINDING                                  | 78  | 0.358851 | 1.472436 | 0.042945 | 0.155866 |
| GO CELLULAR RESPONSE TO ABIOTIC STIMULUS                             | 248 | 0.312991 | 1.472137 | 0.014113 | 0.155944 |
| GO DNA TEMPLATED TRANSCRIPTION INITIATION                            | 199 | 0.330776 | 1.470671 | 0.02834  | 0.156874 |
| GO HISTONE METHYLTRANSFERASE ACTIVITY                                | 47  | 0.4024   | 1.469665 | 0.048682 | 0.157389 |
| GO POSITIVE REGULATION OF CELLULAR AMIDE METABOLIC PROCESS           | 100 | 0.336879 | 1.467412 | 0.02549  | 0.158626 |
| GO RESPONSE TO TEMPERATURE STIMULUS                                  | 140 | 0.32308  | 1.467324 | 0.021782 | 0.158515 |
| GO RESPONSE TO DSRNA                                                 | 54  | 0.376507 | 1.466746 | 0.046122 | 0.158828 |
| GO TRANSCRIPTION FACTOR BINDING                                      | 498 | 0.296285 | 1.466611 | 0.02     | 0.158752 |
| GO MULTICELLULAR ORGANISM GROWTH                                     | 75  | 0.372835 | 1.465618 | 0.044872 | 0.159269 |
| GO MALE GAMETE GENERATION                                            | 392 | 0.307269 | 1.461617 | 0.014141 | 0.162046 |
| GO REGULATION OF SYMBIOSIS ENCOMPASSING MUTUALISM THROUGH PARASITISM | 190 | 0.337367 | 1.460185 | 0.045455 | 0.162727 |
| GO FIBROBLAST GROWTH FACTOR RECEPTOR SIGNALING PATHWAY               | 82  | 0.36394  | 1.458055 | 0.028195 | 0.164147 |
| GO CELLULAR RESPONSE TO OXIDATIVE STRESS                             | 177 | 0.307289 | 1.452635 | 0.039841 | 0.168313 |

|                                                                 |     |          |          |          |          |
|-----------------------------------------------------------------|-----|----------|----------|----------|----------|
| GO GAMETE GENERATION                                            | 488 | 0.296253 | 1.450981 | 0.008163 | 0.169159 |
| GO REGENERATION                                                 | 154 | 0.320195 | 1.448667 | 0.014113 | 0.17051  |
| GO POSITIVE REGULATION OF APOPTOTIC SIGNALING PATHWAY           | 165 | 0.326739 | 1.44829  | 0.040153 | 0.170663 |
| GO MODIFICATION OF MORPHOLOGY OR PHYSIOLOGY OF OTHER ORGANISM   | 93  | 0.350985 | 1.445248 | 0.04466  | 0.172447 |
| GO CELL CELL RECOGNITION                                        | 55  | 0.376927 | 1.444711 | 0.035433 | 0.172575 |
| GO POSITIVE REGULATION OF PROTEIN COMPLEX ASSEMBLY              | 180 | 0.315865 | 1.443326 | 0.022403 | 0.173563 |
| GO POSITIVE REGULATION OF INTRACELLULAR PROTEIN TRANSPORT       | 234 | 0.283669 | 1.44141  | 0.006073 | 0.17518  |
| GO CELLULAR RESPONSE TO ALKALOID                                | 32  | 0.410123 | 1.437461 | 0.047009 | 0.178375 |
| GO MACROMITOPHAGY                                               | 126 | 0.316175 | 1.434153 | 0.02729  | 0.181027 |
| GO INTRACELLULAR RECEPTOR SIGNALING PATHWAY                     | 160 | 0.311802 | 1.42136  | 0.041322 | 0.19102  |
| GO TRANSFERASE ACTIVITY TRANSFERRING PENTOSYL GROUPS            | 51  | 0.365795 | 1.419206 | 0.038076 | 0.192742 |
| GO RHYTHMIC PROCESS                                             | 278 | 0.304002 | 1.40876  | 0.026749 | 0.200677 |
| GO REGULATION OF APOPTOTIC SIGNALING PATHWAY                    | 345 | 0.291963 | 1.407353 | 0.030303 | 0.201899 |
| GO TRANSCRIPTION COACTIVATOR ACTIVITY                           | 290 | 0.296081 | 1.407209 | 0.045276 | 0.201844 |
| GO CELLULAR RESPONSE TO REACTIVE OXYGEN SPECIES                 | 102 | 0.320337 | 1.407159 | 0.043738 | 0.201686 |
| GO GUANYL NUCLEOTIDE BINDING                                    | 354 | 0.283128 | 1.406677 | 0.030181 | 0.202003 |
| GO TRANSCRIPTION COREPRESSOR ACTIVITY                           | 208 | 0.304639 | 1.399538 | 0.041916 | 0.208186 |
| GO RESPONSE TO DRUG                                             | 422 | 0.274481 | 1.397801 | 0.010101 | 0.209452 |
| GO POSITIVE REGULATION OF INTRACELLULAR TRANSPORT               | 344 | 0.270309 | 1.397633 | 0.018219 | 0.209411 |
| GO REGULATION OF NEURON APOPTOTIC PROCESS                       | 184 | 0.29975  | 1.393404 | 0.031847 | 0.213397 |
| GO REGULATION OF NEURON DEATH                                   | 240 | 0.289991 | 1.392277 | 0.029412 | 0.214432 |
| GO NEGATIVE REGULATION OF APOPTOTIC SIGNALING PATHWAY           | 187 | 0.298141 | 1.370826 | 0.032946 | 0.232941 |
| GO REGULATION OF PROTEIN COMPLEX ASSEMBLY                       | 350 | 0.27938  | 1.368159 | 0.045365 | 0.234898 |
| GO RESPONSE TO LIGHT STIMULUS                                   | 263 | 0.270883 | 1.363366 | 0.029703 | 0.238373 |
| GO POSITIVE REGULATION OF ESTABLISHMENT OF PROTEIN LOCALIZATION | 480 | 0.262778 | 1.360569 | 0.018036 | 0.240691 |

ES, enrichment score; NES, normalized enrichment score; FDR, false discovery rate; GSEA, gene set enrichment analysis; KIF, kinesin.





**Table SVII. GSEA results of c2 reference gene set of high *KIF20A* expression group.**

| Name                                             | Size | ES       | NES      | NOM<br>P-value | FDR<br>q-value |
|--------------------------------------------------|------|----------|----------|----------------|----------------|
| SHEPARD BMYB TARGETS                             | 70   | 0.802631 | 2.656269 | <0.0001        | <0.0001        |
| ZHENG GLIOBLASTOMA PLASTICITY UP                 | 240  | 0.651472 | 2.615603 | <0.0001        | <0.0001        |
| LINDGREN BLADDER CANCER CLUSTER 1 DN             | 356  | 0.610233 | 2.613528 | <0.0001        | <0.0001        |
| SHEPARD BMYB MORPHOLINO DN                       | 193  | 0.659408 | 2.581854 | <0.0001        | <0.0001        |
| WHITFIELD CELL CYCLE G2                          | 169  | 0.712235 | 2.573517 | <0.0001        | <0.0001        |
| SHEPARD CRUSH AND BURN MUTANT DN                 | 174  | 0.673587 | 2.568264 | <0.0001        | <0.0001        |
| AFFAR YY1 TARGETS DN                             | 226  | 0.639852 | 2.566641 | <0.0001        | <0.0001        |
| WANG RESPONSE TO GSK3 INHIBITOR SB216763<br>DN   | 332  | 0.700047 | 2.554467 | <0.0001        | <0.0001        |
| BLUM RESPONSE TO SALIRASIB DN                    | 336  | 0.757989 | 2.554172 | <0.0001        | <0.0001        |
| GAVIN FOXP3 TARGETS CLUSTER P6                   | 88   | 0.841893 | 2.546011 | <0.0001        | 8.87E-05       |
| WHITFIELD CELL CYCLE G2 M                        | 196  | 0.678959 | 2.537096 | <0.0001        | 8.06E-05       |
| CHIANG LIVER CANCER SUBCLASS<br>PROLIFERATION UP | 164  | 0.816784 | 2.533647 | <0.0001        | 7.39E-05       |
| FURUKAWA DUSP6 TARGETS PCI35 DN                  | 67   | 0.845559 | 2.529801 | <0.0001        | 6.82E-05       |
| LINDGREN BLADDER CANCER CLUSTER 3 UP             | 305  | 0.754659 | 2.524941 | <0.0001        | 6.33E-05       |
| CROONQUIST NRAS VS STROMAL<br>STIMULATION DN     | 98   | 0.719261 | 2.516658 | <0.0001        | 1.18E-04       |
| FOURNIER ACINAR DEVELOPMENT LATE 2               | 265  | 0.778547 | 2.515954 | <0.0001        | 1.11E-04       |
| DUTERTRE ESTRADIOL RESPONSE 24HR UP              | 309  | 0.844973 | 2.511946 | <0.0001        | 1.04E-04       |
| RUIZ TNC TARGETS DN                              | 136  | 0.821116 | 2.509466 | <0.0001        | 9.85E-05       |
| VECCHI GASTRIC CANCER EARLY UP                   | 384  | 0.724539 | 2.508717 | <0.0001        | 9.33E-05       |
| FERREIRA EWINGS SARCOMA UNSTABLE VS<br>STABLE UP | 148  | 0.809669 | 2.504084 | <0.0001        | 8.87E-05       |
| KEGG CELL CYCLE                                  | 124  | 0.748246 | 2.501335 | <0.0001        | 8.44E-05       |
| ALCALAY AML BY NPM1 LOCALIZATION DN              | 180  | 0.592604 | 2.501267 | <0.0001        | 8.06E-05       |
| ODONNELL TFRC TARGETS DN                         | 123  | 0.826077 | 2.495552 | <0.0001        | 7.71E-05       |
| KAUFFMANN DNA REPLICATION GENES                  | 141  | 0.707813 | 2.494323 | <0.0001        | 7.39E-05       |
| TARTE PLASMA CELL VS PLASMABLAST DN              | 300  | 0.732544 | 2.488711 | <0.0001        | 7.09E-05       |
| HORIUCHI WTAP TARGETS DN                         | 293  | 0.754158 | 2.488448 | <0.0001        | 6.82E-05       |
| PUJANA BRCA2 PCC NETWORK                         | 401  | 0.741997 | 2.481012 | <0.0001        | 6.57E-05       |
| BENPORATH ES 1                                   | 356  | 0.675446 | 2.479131 | <0.0001        | 6.33E-05       |
| LI WILMS TUMOR VS FETAL KIDNEY 1 DN              | 159  | 0.825039 | 2.474358 | <0.0001        | 6.11E-05       |
| CHEMNITZ RESPONSE TO PROSTAGLANDIN E2<br>UP      | 129  | 0.775623 | 2.468962 | <0.0001        | 5.91E-05       |
| GOLDRATH ANTIGEN RESPONSE                        | 331  | 0.649625 | 2.461392 | <0.0001        | 5.72E-05       |
| LE EGR2 TARGETS UP                               | 104  | 0.821072 | 2.457737 | <0.0001        | 5.54E-05       |
| SARRIO EPITHELIAL MESENCHYMAL<br>TRANSITION UP   | 171  | 0.802858 | 2.455491 | <0.0001        | 5.37E-05       |
| FUJII YBX1 TARGETS DN                            | 193  | 0.784346 | 2.449808 | <0.0001        | 5.22E-05       |
| FLORIO NEOCORTEX BASAL RADIAL GLIA DN            | 187  | 0.859303 | 2.447377 | <0.0001        | 5.07E-05       |
| REACTOME CELL CYCLE MITOTIC                      | 299  | 0.768099 | 2.446904 | <0.0001        | 4.93E-05       |
| TOYOTA TARGETS OF MIR34B AND MIR34C              | 409  | 0.651404 | 2.445212 | <0.0001        | 4.79E-05       |
| KAUFFMANN DNA REPAIR GENES                       | 219  | 0.67238  | 2.443899 | <0.0001        | 4.67E-05       |
| GRAHAM CML DIVIDING VS NORMAL                    | 176  | 0.816467 | 2.442417 | <0.0001        | 4.55E-05       |

|                                                  |     |          |          |         |          |
|--------------------------------------------------|-----|----------|----------|---------|----------|
| QUIESCENT UP                                     |     |          |          |         |          |
| FERRANDO T ALL WITH MLL ENL FUSION DN            | 83  | 0.706393 | 2.441514 | <0.0001 | 4.43E-05 |
| FISCHER G2 M CELL CYCLE                          | 220 | 0.773016 | 2.440693 | <0.0001 | 4.32E-05 |
| PENG LEUCINE DEPRIVATION DN                      | 182 | 0.724565 | 2.440399 | <0.0001 | 4.22E-05 |
| VILLANUEVA LIVER CANCER KRT19 UP                 | 162 | 0.745511 | 2.438866 | <0.0001 | 4.12E-05 |
| WEST ADRENOCORTICAL TUMOR UP                     | 282 | 0.703868 | 2.437771 | <0.0001 | 4.03E-05 |
| KOBAYASHI EGFR SIGNALING 24HR DN                 | 242 | 0.883552 | 2.431332 | <0.0001 | 5.69E-05 |
| MARKEY RB1 ACUTE LOF UP                          | 223 | 0.759769 | 2.427964 | <0.0001 | 5.57E-05 |
| LEE EARLY T LYMPHOCYTE UP                        | 97  | 0.859455 | 2.425619 | <0.0001 | 5.45E-05 |
| PENG GLUTAMINE DEPRIVATION DN                    | 324 | 0.684717 | 2.42535  | <0.0001 | 5.34E-05 |
| PID FOXM1 PATHWAY                                | 40  | 0.786062 | 2.424423 | <0.0001 | 5.23E-05 |
| CHANG CORE SERUM RESPONSE UP                     | 198 | 0.754768 | 2.423473 | <0.0001 | 5.12E-05 |
| NADERI BREAST CANCER PROGNOSIS UP                | 46  | 0.835304 | 2.421939 | <0.0001 | 5.02E-05 |
| HOFFMANN LARGE TO SMALL PRE BII<br>LYMPHOCYTE UP | 158 | 0.813413 | 2.42169  | <0.0001 | 4.92E-05 |
| BASAKI YBX1 TARGETS UP                           | 268 | 0.755139 | 2.419762 | <0.0001 | 4.83E-05 |
| BURTON ADIPOGENESIS 3                            | 100 | 0.885161 | 2.419248 | <0.0001 | 4.74E-05 |
| SHEDDEN LUNG CANCER POOR SURVIVAL A6             | 427 | 0.834268 | 2.417888 | <0.0001 | 4.66E-05 |
| MORI PRE BI LYMPHOCYTE UP                        | 78  | 0.792199 | 2.414612 | <0.0001 | 4.57E-05 |
| DUTERTRE ESTRADIOL RESPONSE 6HR UP               | 218 | 0.615295 | 2.412116 | <0.0001 | 4.49E-05 |
| PAL PRMT5 TARGETS UP                             | 195 | 0.673493 | 2.412099 | <0.0001 | 4.42E-05 |
| REACTOME CELL CYCLE                              | 386 | 0.731138 | 2.406875 | <0.0001 | 4.34E-05 |
| MITSIADES RESPONSE TO APLIDIN DN                 | 239 | 0.739487 | 2.403384 | <0.0001 | 4.27E-05 |
| MORI MATURE B LYMPHOCYTE DN                      | 72  | 0.698772 | 2.400354 | <0.0001 | 4.20E-05 |
| ZHANG TLX TARGETS 60HR DN                        | 263 | 0.822418 | 2.399016 | <0.0001 | 4.13E-05 |
| PUJANA BREAST CANCER LIT INT NETWORK             | 97  | 0.727567 | 2.395764 | <0.0001 | 4.06E-05 |
| MANALO HYPOXIA DN                                | 271 | 0.789348 | 2.393338 | <0.0001 | 4.00E-05 |
| CHIARADONNA NEOPLASTIC<br>TRANSFORMATION KRAS UP | 121 | 0.646252 | 2.390038 | <0.0001 | 3.94E-05 |
| SUNG METASTASIS STROMA DN                        | 49  | 0.761507 | 2.386991 | <0.0001 | 3.88E-05 |
| CHANG CYCLING GENES                              | 138 | 0.897186 | 2.380791 | <0.0001 | 3.82E-05 |
| MUELLER PLURINET                                 | 296 | 0.727291 | 2.375289 | <0.0001 | 3.77E-05 |
| OLSSON E2F3 TARGETS DN                           | 45  | 0.75663  | 2.375119 | <0.0001 | 3.71E-05 |
| SENGUPTA NASOPHARYNGEAL CARCINOMA UP             | 275 | 0.688554 | 2.371166 | <0.0001 | 3.66E-05 |
| GRADE COLON AND RECTAL CANCER UP                 | 272 | 0.689616 | 2.369742 | <0.0001 | 3.61E-05 |
| RHODES CANCER META SIGNATURE                     | 63  | 0.824565 | 2.367783 | <0.0001 | 3.56E-05 |
| YU BAP1 TARGETS                                  | 29  | 0.816978 | 2.363458 | <0.0001 | 3.51E-05 |
| GARCIA TARGETS OF FLI1 AND DAX1 DN               | 163 | 0.685363 | 2.360428 | <0.0001 | 3.46E-05 |
| STEIN ESR1 TARGETS                               | 82  | 0.614875 | 2.356168 | <0.0001 | 3.41E-05 |
| STEIN ESRRA TARGETS RESPONSIVE TO<br>ESTROGEN DN | 39  | 0.838376 | 2.354901 | <0.0001 | 3.37E-05 |
| LABBE WNT3A TARGETS UP                           | 108 | 0.564569 | 2.354374 | <0.0001 | 3.33E-05 |
| MATTIOLI MGUS VS PCL                             | 93  | 0.670082 | 2.350928 | <0.0001 | 3.28E-05 |
| WONG EMBRYONIC STEM CELL CORE                    | 330 | 0.782686 | 2.349663 | <0.0001 | 3.24E-05 |
| FISCHER G1 S CELL CYCLE                          | 192 | 0.645141 | 2.347123 | <0.0001 | 3.20E-05 |
| YAMAZAKI TCEB3 TARGETS DN                        | 204 | 0.596625 | 2.346649 | <0.0001 | 3.16E-05 |
| CHICAS RB1 TARGETS GROWING                       | 225 | 0.660273 | 2.346521 | <0.0001 | 3.12E-05 |
| PEART HDAC PROLIFERATION CLUSTER DN              | 73  | 0.698793 | 2.345058 | <0.0001 | 3.09E-05 |
| MARTINEZ RESPONSE TO TRABECTEDIN DN              | 265 | 0.608323 | 2.337846 | <0.0001 | 3.05E-05 |

|                                              |     |          |          |         |          |
|----------------------------------------------|-----|----------|----------|---------|----------|
| DANG REGULATED BY MYC UP                     | 71  | 0.718202 | 2.337466 | <0.0001 | 3.01E-05 |
| BIDUS METASTASIS UP                          | 204 | 0.74564  | 2.336888 | <0.0001 | 2.98E-05 |
| CROONQUIST IL6 DEPRIVATION DN                | 96  | 0.926585 | 2.33466  | <0.0001 | 2.94E-05 |
| NAKAMURA TUMOR ZONE PERIPHERAL VS CENTRAL UP | 267 | 0.62323  | 2.329402 | <0.0001 | 2.91E-05 |
| WANG CISPLATIN RESPONSE AND XPC UP           | 190 | 0.582687 | 2.327121 | <0.0001 | 3.87E-05 |
| REACTOME MITOTIC PROMETAPHASE                | 78  | 0.817117 | 2.326365 | <0.0001 | 3.83E-05 |
| WU APOPTOSIS BY CDKN1A VIA TP53              | 54  | 0.897366 | 2.319022 | <0.0001 | 3.79E-05 |
| SERVITJA LIVER HNF1A TARGETS UP              | 132 | 0.548299 | 2.318418 | <0.0001 | 3.75E-05 |
| MORI EMU MYC LYMPHOMA BY ONSET TIME UP       | 99  | 0.700342 | 2.317563 | <0.0001 | 3.71E-05 |
| VANTVEER BREAST CANCER METASTASIS DN         | 111 | 0.749097 | 2.313222 | <0.0001 | 5.75E-05 |
| GARY CD5 TARGETS DN                          | 414 | 0.626669 | 2.312187 | <0.0001 | 5.69E-05 |
| WINNEPENNINGCKX MELANOMA METASTASIS UP       | 151 | 0.841519 | 2.309215 | <0.0001 | 5.63E-05 |
| PID AURORA A PATHWAY                         | 30  | 0.773165 | 2.308975 | <0.0001 | 5.58E-05 |
| ZHANG TLX TARGETS 36HR DN                    | 182 | 0.804029 | 2.307495 | <0.0001 | 5.52E-05 |
| MORI IMMATURE B LYMPHOCYTE DN                | 90  | 0.861128 | 2.307225 | <0.0001 | 5.46E-05 |
| REACTOME DNA REPLICATION                     | 180 | 0.815711 | 2.306703 | <0.0001 | 5.41E-05 |
| MORI LARGE PRE BII LYMPHOCYTE UP             | 84  | 0.855263 | 2.305141 | <0.0001 | 5.36E-05 |
| ZHOU CELL CYCLE GENES IN IR RESPONSE 24HR    | 119 | 0.877257 | 2.304622 | <0.0001 | 5.30E-05 |
| LEE LIVER CANCER SURVIVAL DN                 | 165 | 0.737533 | 2.304316 | <0.0001 | 5.25E-05 |
| GRAHAM CML QUIESCENT VS NORMAL QUIESCENT UP  | 80  | 0.675598 | 2.304025 | <0.0001 | 5.20E-05 |
| KIM WT1 TARGETS DN                           | 427 | 0.548431 | 2.30239  | <0.0001 | 6.94E-05 |
| NAKAYAMA SOFT TISSUE TUMORS PCA2 UP          | 86  | 0.785448 | 2.301036 | <0.0001 | 6.88E-05 |
| BASSO B LYMPHOCYTE NETWORK                   | 135 | 0.610607 | 2.300966 | <0.0001 | 6.81E-05 |
| TANG SENESENCE TP53 TARGETS DN               | 54  | 0.888587 | 2.296711 | <0.0001 | 7.57E-05 |
| PID E2F PATHWAY                              | 73  | 0.687721 | 2.295755 | <0.0001 | 7.50E-05 |
| WHITFIELD CELL CYCLE G1 S                    | 128 | 0.629731 | 2.294695 | <0.0001 | 7.43E-05 |
| MISSIAGLIA REGULATED BY METHYLATION DN       | 115 | 0.841381 | 2.293515 | <0.0001 | 7.37E-05 |
| BOYALT LIVER CANCER SUBCLASS G23 UP          | 49  | 0.840838 | 2.292783 | <0.0001 | 7.30E-05 |
| GAL LEUKEMIC STEM CELL DN                    | 233 | 0.575006 | 2.291644 | <0.0001 | 7.23E-05 |
| PUJANA XPRSS INT NETWORK                     | 161 | 0.79475  | 2.290809 | <0.0001 | 7.17E-05 |
| SASAKI ADULT T CELL LEUKEMIA                 | 168 | 0.598799 | 2.288616 | <0.0001 | 8.44E-05 |
| BIOCARTA G1 PATHWAY                          | 28  | 0.743284 | 2.287976 | <0.0001 | 9.51E-05 |
| KOKKINAKIS METHIONINE DEPRIVATION 96HR DN    | 75  | 0.622393 | 2.286718 | <0.0001 | 9.42E-05 |
| REACTOME HIV INFECTION                       | 184 | 0.646496 | 2.285704 | <0.0001 | 9.34E-05 |
| REACTOME MITOTIC M M G1 PHASES               | 160 | 0.806416 | 2.284625 | <0.0001 | 9.27E-05 |
| RIZ ERYTHROID DIFFERENTIATION                | 72  | 0.66401  | 2.284129 | <0.0001 | 9.19E-05 |
| BURTON ADIPOGENESIS PEAK AT 24HR             | 42  | 0.885326 | 2.281984 | <0.0001 | 9.11E-05 |
| PETROVA PROX1 TARGETS UP                     | 27  | 0.833947 | 2.281804 | <0.0001 | 9.04E-05 |
| REACTOME MITOTIC G1 G1 S PHASES              | 130 | 0.772641 | 2.281422 | <0.0001 | 8.96E-05 |
| KONG E2F3 TARGETS                            | 94  | 0.892721 | 2.279917 | <0.0001 | 8.89E-05 |
| VERNELL RETINOBLASTOMA PATHWAY UP            | 68  | 0.820238 | 2.279614 | <0.0001 | 8.82E-05 |
| WILCOX RESPONSE TO PROGESTERONE UP           | 140 | 0.633719 | 2.278736 | <0.0001 | 8.75E-05 |

|                                                            |     |          |          |         |          |
|------------------------------------------------------------|-----|----------|----------|---------|----------|
| PID PLK1 PATHWAY                                           | 43  | 0.82234  | 2.277788 | <0.0001 | 8.68E-05 |
| REACTOME DNA REPAIR                                        | 101 | 0.66429  | 2.276695 | <0.0001 | 9.28E-05 |
| LY AGING PREMATURE DN                                      | 29  | 0.857635 | 2.276457 | <0.0001 | 9.21E-05 |
| PID AURORA B PATHWAY                                       | 37  | 0.835663 | 2.276183 | <0.0001 | 9.14E-05 |
| HU GENOTOXIC DAMAGE 4HR                                    | 35  | 0.804472 | 2.27561  | <0.0001 | 9.07E-05 |
| ZHANG TLX TARGETS DN                                       | 87  | 0.903752 | 2.271087 | <0.0001 | 9.79E-05 |
| KARLSSON TGFB1 TARGETS UP                                  | 118 | 0.68182  | 2.270156 | <0.0001 | 9.72E-05 |
| BENPORATH PROLIFERATION                                    | 136 | 0.814845 | 2.267696 | <0.0001 | 9.64E-05 |
| BORCZUK MALIGNANT MESOTHELIOMA UP                          | 291 | 0.665527 | 2.267183 | <0.0001 | 9.57E-05 |
| MOLENAAR TARGETS OF CCND1 AND CDK4 DN                      | 51  | 0.884319 | 2.267117 | <0.0001 | 9.50E-05 |
| REACTOME MRNA PROCESSING                                   | 151 | 0.690596 | 2.266044 | <0.0001 | 9.43E-05 |
| VANTVEER BREAST CANCER ESR1 DN                             | 226 | 0.591236 | 2.264723 | <0.0001 | 9.36E-05 |
| CROONQUIST NRAS SIGNALING DN                               | 71  | 0.951107 | 2.262719 | <0.0001 | 9.92E-05 |
| GARGALOVIC RESPONSE TO OXIDIZED PHOSPHOLIPIDS TURQUOISE DN | 50  | 0.750593 | 2.260403 | <0.0001 | 1.05E-04 |
| HEDENFALK BREAST CANCER BRCA1 VS BRCA2                     | 156 | 0.566779 | 2.255127 | <0.0001 | 1.46E-04 |
| JIANG HYPOXIA VIA VHL                                      | 33  | 0.705898 | 2.254675 | <0.0001 | 1.45E-04 |
| REACTOME PROCESSING OF CAPPED INTRON CONTAINING PRE MRNA   | 132 | 0.713803 | 2.25439  | <0.0001 | 1.44E-04 |
| REACTOME HOST INTERACTIONS OF HIV FACTORS                  | 117 | 0.68745  | 2.252121 | <0.0001 | 1.49E-04 |
| BOYAUULT LIVER CANCER SUBCLASS G3 UP                       | 181 | 0.752808 | 2.250634 | <0.0001 | 1.56E-04 |
| DAIRKEE CANCER PRONE RESPONSE BPA E2                       | 113 | 0.579432 | 2.248863 | <0.0001 | 1.62E-04 |
| REN BOUND BY E2F                                           | 60  | 0.899512 | 2.247448 | <0.0001 | 1.61E-04 |
| PUJANA BRCA CENTERED NETWORK                               | 114 | 0.8125   | 2.24344  | <0.0001 | 1.73E-04 |
| BHATTACHARYA EMBRYONIC STEM CELL                           | 86  | 0.704537 | 2.241456 | <0.0001 | 1.72E-04 |
| PETROVA ENDOTHELIUM LYMPHATIC VS BLOOD UP                  | 126 | 0.571703 | 2.240254 | <0.0001 | 1.70E-04 |
| KEGG OOCYTE MEIOSIS                                        | 107 | 0.575793 | 2.239956 | <0.0001 | 1.69E-04 |
| REACTOME MITOTIC G2 G2 M PHASES                            | 77  | 0.682676 | 2.239458 | <0.0001 | 1.68E-04 |
| HONRADO BREAST CANCER BRCA1 VS BRCA2                       | 18  | 0.808366 | 2.237769 | <0.0001 | 1.67E-04 |
| EPPERT PROGENITOR                                          | 125 | 0.654324 | 2.237695 | <0.0001 | 1.66E-04 |
| NAKAMURA CANCER MICROENVIRONMENT DN                        | 43  | 0.82616  | 2.236787 | <0.0001 | 1.65E-04 |
| GENTILE RESPONSE CLUSTER D3                                | 61  | 0.641656 | 2.23442  | <0.0001 | 1.83E-04 |
| PID MYC ACTIV PATHWAY                                      | 78  | 0.6856   | 2.234392 | <0.0001 | 1.82E-04 |
| BHATI G2M ARREST BY 2METHOXYESTRADIOL UP                   | 108 | 0.580707 | 2.234217 | <0.0001 | 1.81E-04 |
| CUI TCF21 TARGETS 2 UP                                     | 404 | 0.517304 | 2.231956 | <0.0001 | 1.88E-04 |
| PUIFFE INVASION INHIBITED BY ASCITES UP                    | 81  | 0.605884 | 2.231597 | <0.0001 | 1.86E-04 |
| SONG TARGETS OF IE86 CMV PROTEIN                           | 58  | 0.883195 | 2.228269 | <0.0001 | 1.92E-04 |
| GRAHAM NORMAL QUIESCENT VS NORMAL DIVIDING DN              | 85  | 0.884784 | 2.227712 | <0.0001 | 1.99E-04 |
| OUELLET OVARIAN CANCER INVASIVE VS LMP UP                  | 117 | 0.683375 | 2.226244 | <0.0001 | 2.03E-04 |
| REACTOME CELL CYCLE CHECKPOINTS                            | 111 | 0.785429 | 2.226095 | <0.0001 | 2.02E-04 |
| PENG RAPAMYCIN RESPONSE DN                                 | 230 | 0.658897 | 2.224966 | <0.0001 | 2.01E-04 |
| XU HGF SIGNALING NOT VIA AKT1 48HR DN                      | 20  | 0.804219 | 2.224274 | <0.0001 | 2.07E-04 |
| YAO TEMPORAL RESPONSE TO PROGESTERONE                      | 95  | 0.638624 | 2.22407  | <0.0001 | 2.06E-04 |

|                                                                 |     |          |          |         |          |
|-----------------------------------------------------------------|-----|----------|----------|---------|----------|
| CLUSTER 11                                                      |     |          |          |         |          |
| RHEIN ALL GLUCOCORTICOID THERAPY DN                             | 349 | 0.640348 | 2.221804 | <0.0001 | 2.15E-04 |
| BIOCARTA G2 PATHWAY                                             | 24  | 0.786952 | 2.217385 | <0.0001 | 2.25E-04 |
| BOYVAULT LIVER CANCER SUBCLASS G123 UP                          | 44  | 0.786603 | 2.217216 | <0.0001 | 2.23E-04 |
| OXFORD RALA OR RALB TARGETS UP                                  | 45  | 0.859273 | 2.216625 | <0.0001 | 2.27E-04 |
| MOHANKUMAR HOXA1 TARGETS UP                                     | 384 | 0.53592  | 2.216425 | <0.0001 | 2.26E-04 |
| ZHOU CELL CYCLE GENES IN IR RESPONSE 6HR                        | 80  | 0.898959 | 2.215656 | <0.0001 | 2.25E-04 |
| BURTON ADIPOGENESIS PEAK AT 16HR                                | 40  | 0.809052 | 2.215619 | <0.0001 | 2.23E-04 |
| BENPORATH ES CORE NINE CORRELATED                               | 98  | 0.626002 | 2.21552  | <0.0001 | 2.27E-04 |
| SCIBETTA KDM5B TARGETS DN                                       | 77  | 0.634773 | 2.212216 | <0.0001 | 2.39E-04 |
| GREENBAUM E2A TARGETS UP                                        | 32  | 0.874658 | 2.211874 | <0.0001 | 2.38E-04 |
| REACTOME MRNA SPLICING                                          | 104 | 0.704787 | 2.210336 | <0.0001 | 2.42E-04 |
| PID ATR PATHWAY                                                 | 39  | 0.827848 | 2.209876 | <0.0001 | 2.40E-04 |
| LY AGING OLD DN                                                 | 55  | 0.817207 | 2.208008 | <0.0001 | 2.49E-04 |
| KAUFFMANN MELANOMA RELAPSE UP                                   | 59  | 0.89174  | 2.207599 | <0.0001 | 2.48E-04 |
| ZHANG BREAST CANCER PROGENITORS UP                              | 399 | 0.623704 | 2.20744  | <0.0001 | 2.46E-04 |
| REACTOME HIV LIFE CYCLE                                         | 105 | 0.646468 | 2.206255 | <0.0001 | 2.65E-04 |
| DAIRKEE CANCER PRONE RESPONSE BPA                               | 49  | 0.641449 | 2.205406 | <0.0001 | 2.72E-04 |
| WHITEFORD PEDIATRIC CANCER MARKERS                              | 111 | 0.865998 | 2.205113 | <0.0001 | 2.71E-04 |
| PID ATM PATHWAY                                                 | 33  | 0.747197 | 2.204631 | <0.0001 | 2.75E-04 |
| JUBAN TARGETS OF SPI1 AND FLI1 DN                               | 84  | 0.607815 | 2.204493 | <0.0001 | 2.74E-04 |
| WINTER HYPOXIA UP                                               | 88  | 0.715446 | 2.204086 | <0.0001 | 2.84E-04 |
| SU TESTIS                                                       | 67  | 0.685426 | 2.202514 | <0.0001 | 2.92E-04 |
| SCHLOSSER MYC TARGETS REPRESSED BY SERUM                        | 153 | 0.703074 | 2.201421 | <0.0001 | 2.91E-04 |
| JAEGER METASTASIS UP                                            | 43  | 0.705596 | 2.198684 | <0.0001 | 3.05E-04 |
| ZAMORA NOS2 TARGETS UP                                          | 64  | 0.688678 | 2.198016 | <0.0001 | 3.12E-04 |
| PYEON CANCER HEAD AND NECK VS CERVICAL UP                       | 169 | 0.65919  | 2.19704  | <0.0001 | 3.29E-04 |
| REACTOME LATE PHASE OF HIV LIFE CYCLE                           | 92  | 0.656757 | 2.195408 | <0.0001 | 3.45E-04 |
| MARKEY RB1 CHRONIC LOF UP                                       | 111 | 0.572069 | 2.195134 | <0.0001 | 3.49E-04 |
| LIAO METASTASIS                                                 | 495 | 0.497796 | 2.194518 | <0.0001 | 3.51E-04 |
| KEGG SPLICEOSOME                                                | 123 | 0.680175 | 2.193909 | <0.0001 | 3.50E-04 |
| WEST ADRENOCORTICAL TUMOR MARKERS UP                            | 21  | 0.836116 | 2.193707 | <0.0001 | 3.48E-04 |
| PID FANCONI PATHWAY                                             | 43  | 0.792264 | 2.193406 | <0.0001 | 3.46E-04 |
| WHITFIELD CELL CYCLE S                                          | 147 | 0.609519 | 2.19255  | <0.0001 | 3.49E-04 |
| THILLAINADESAN ZNF217 TARGETS UP                                | 42  | 0.697736 | 2.191752 | <0.0001 | 3.47E-04 |
| SHIPP DLBCL VS FOLLICULAR LYMPHOMA UP                           | 44  | 0.785107 | 2.191032 | <0.0001 | 3.45E-04 |
| FRASOR RESPONSE TO SERM OR FULVESTRANT DN                       | 50  | 0.863427 | 2.187237 | <0.0001 | 3.70E-04 |
| GEORGES CELL CYCLE MIR192 TARGETS                               | 61  | 0.718211 | 2.187092 | <0.0001 | 3.68E-04 |
| REACTOME S PHASE                                                | 106 | 0.801519 | 2.186572 | <0.0001 | 3.74E-04 |
| REACTOME FORMATION OF TUBULIN FOLDING INTERMEDIATES BY CCT TRIC | 21  | 0.826151 | 2.186182 | <0.0001 | 3.72E-04 |
| KEGG MISMATCH REPAIR                                            | 23  | 0.862493 | 2.180398 | <0.0001 | 4.24E-04 |
| TURASHVILI BREAST DUCTAL CARCINOMA VS LOBULAR NORMAL UP         | 71  | 0.669102 | 2.178645 | <0.0001 | 4.86E-04 |
| SCHUHMACHER MYC TARGETS UP                                      | 77  | 0.727441 | 2.178332 | <0.0001 | 4.84E-04 |
| BIOCARTA CELLCYCLE PATHWAY                                      | 23  | 0.783486 | 2.178084 | <0.0001 | 4.81E-04 |

|                                                                   |     |          |          |          |          |
|-------------------------------------------------------------------|-----|----------|----------|----------|----------|
| REACTOME G1 S TRANSITION                                          | 106 | 0.78687  | 2.17783  | <0.0001  | 4.79E-04 |
| LE NEURONAL DIFFERENTIATION DN                                    | 19  | 0.862406 | 2.177309 | <0.0001  | 4.77E-04 |
| REACTOME RNA POL II TRANSCRIPTION                                 | 93  | 0.643004 | 2.173343 | <0.0001  | 5.37E-04 |
| IWANAGA E2F1 TARGETS INDUCED BY SERUM                             | 29  | 0.793548 | 2.172279 | <0.0001  | 5.39E-04 |
| REACTOME DOUBLE STRAND BREAK REPAIR                               | 21  | 0.81534  | 2.169414 | <0.0001  | 5.59E-04 |
| SLEBOS HEAD AND NECK CANCER WITH HPV UP                           | 78  | 0.725707 | 2.163178 | <0.0001  | 5.92E-04 |
| ODONNELL TARGETS OF MYC AND TFRC DN                               | 43  | 0.873222 | 2.159768 | <0.0001  | 6.22E-04 |
| DELPUECH FOXO3 TARGETS DN                                         | 39  | 0.775718 | 2.15925  | <0.0001  | 6.24E-04 |
| KEGG DNA REPLICATION                                              | 36  | 0.89815  | 2.159128 | <0.0001  | 6.25E-04 |
| REACTOME CLEAVAGE OF GROWING TRANSCRIPT IN THE TERMINATION REGION | 42  | 0.71992  | 2.156895 | <0.0001  | 6.62E-04 |
| CHAUHAN RESPONSE TO METHOXYESTRADIOL UP                           | 50  | 0.652994 | 2.154467 | <0.0001  | 6.87E-04 |
| REACTOME TRANSPORT OF MATURE TRANSCRIPT TO CYTOPLASM              | 51  | 0.722444 | 2.153955 | <0.0001  | 6.88E-04 |
| MOREAUX MULTIPLE MYELOMA BY TACI DN                               | 154 | 0.625533 | 2.151289 | <0.0001  | 7.07E-04 |
| KEGG PROGESTERONE MEDIATED OOCYTE MATURATION                      | 83  | 0.531597 | 2.149597 | 0.001894 | 7.21E-04 |
| TONKS TARGETS OF RUNX1 RUNX1T1 FUSION MONOCYTE UP                 | 195 | 0.533094 | 2.14895  | <0.0001  | 7.26E-04 |
| REACTOME LOSS OF NLP FROM MITOTIC CENTROSOMES                     | 55  | 0.656564 | 2.147539 | <0.0001  | 7.49E-04 |
| PYEON HPV POSITIVE TUMORS UP                                      | 84  | 0.673511 | 2.147419 | <0.0001  | 7.46E-04 |
| SHAFFER IRF4 TARGETS IN ACTIVATED B LYMPHOCYTE                    | 76  | 0.636532 | 2.146382 | <0.0001  | 7.60E-04 |
| HERNANDEZ MITOTIC ARREST BY DOCETAXEL 1 DN                        | 36  | 0.673276 | 2.14605  | <0.0001  | 7.57E-04 |
| BENPORATH ES 2                                                    | 39  | 0.703324 | 2.14518  | <0.0001  | 7.68E-04 |
| YANG BCL3 TARGETS UP                                              | 344 | 0.458627 | 2.14427  | <0.0001  | 7.73E-04 |
| GROSS HYPOXIA VIA ELK3 UP                                         | 198 | 0.49746  | 2.142962 | <0.0001  | 7.88E-04 |
| ENK UV RESPONSE KERATINOCYTE DN                                   | 479 | 0.52216  | 2.142875 | <0.0001  | 7.85E-04 |
| ABRAMSON INTERACT WITH AIRE                                       | 44  | 0.780777 | 2.142795 | <0.0001  | 7.81E-04 |
| LI WILMS TUMOR ANAPLASTIC UP                                      | 19  | 0.964552 | 2.142263 | <0.0001  | 7.95E-04 |
| REICHERT MITOSIS LIN9 TARGETS                                     | 27  | 0.936217 | 2.141701 | <0.0001  | 8.07E-04 |
| DANG MYC TARGETS UP                                               | 138 | 0.684771 | 2.140811 | <0.0001  | 8.11E-04 |
| WILLIAMS ESR1 TARGETS UP                                          | 26  | 0.693538 | 2.14078  | <0.0001  | 8.08E-04 |
| REACTOME PREFOLDIN MEDIATED TRANSFER OF SUBSTRATE TO CCT TRIC     | 27  | 0.816855 | 2.139905 | <0.0001  | 8.17E-04 |
| REACTOME RECRUITMENT OF MITOTIC CENTROSOME PROTEINS AND COMPLEXES | 62  | 0.635064 | 2.139473 | 0.001912 | 8.13E-04 |
| KEGG HOMOLOGOUS RECOMBINATION                                     | 26  | 0.820962 | 2.137479 | <0.0001  | 8.55E-04 |
| SMIRNOV RESPONSE TO IR 6HR DN                                     | 108 | 0.600225 | 2.137246 | <0.0001  | 8.51E-04 |
| VANTVEER BREAST CANCER BRCA1 UP                                   | 31  | 0.65899  | 2.135873 | <0.0001  | 8.59E-04 |
| AMUNDSON GAMMA RADIATION RESPONSE                                 | 40  | 0.880834 | 2.134877 | <0.0001  | 8.59E-04 |
| SOTIRIOU BREAST CANCER GRADE 1 VS 3 UP                            | 141 | 0.913044 | 2.13477  | <0.0001  | 8.55E-04 |
| REACTOME SYNTHESIS OF DNA                                         | 90  | 0.814473 | 2.134385 | <0.0001  | 8.55E-04 |
| REACTOME ANTIVIRAL MECHANISM BY IFN STIMULATED GENES              | 64  | 0.63793  | 2.132462 | <0.0001  | 8.67E-04 |

|                                                                              |     |          |          |          |          |
|------------------------------------------------------------------------------|-----|----------|----------|----------|----------|
| RHODES UNDIFFERENTIATED CANCER                                               | 67  | 0.861496 | 2.132056 | <0.0001  | 8.70E-04 |
| YANG BREAST CANCER ESR1 LASER DN                                             | 49  | 0.620724 | 2.130746 | <0.0001  | 8.88E-04 |
| PRAMOONJAGO SOX4 TARGETS DN                                                  | 50  | 0.647862 | 2.129679 | <0.0001  | 9.18E-04 |
| NUNODA RESPONSE TO DASATINIB IMATINIB UP                                     | 29  | 0.674501 | 2.129547 | <0.0001  | 9.15E-04 |
| REACTOME G2 M CHECKPOINTS                                                    | 41  | 0.875112 | 2.127824 | <0.0001  | 9.34E-04 |
| SIMBULAN PARP1 TARGETS DN                                                    | 17  | 0.906684 | 2.127428 | <0.0001  | 9.31E-04 |
| FOURNIER ACINAR DEVELOPMENT LATE DN                                          | 21  | 0.848796 | 2.12627  | <0.0001  | 9.34E-04 |
| WONG PROTEASOME GENE MODULE                                                  | 49  | 0.72579  | 2.125879 | <0.0001  | 9.35E-04 |
| JOHANSSON GLIOMAGENESIS BY PDGFB UP                                          | 57  | 0.616287 | 2.124298 | <0.0001  | 9.52E-04 |
| ROSTY CERVICAL CANCER PROLIFERATION CLUSTER                                  | 133 | 0.904252 | 2.121761 | <0.0001  | 9.67E-04 |
| WAKASUGI HAVE ZNF143 BINDING SITES                                           | 56  | 0.66893  | 2.12162  | <0.0001  | 9.63E-04 |
| WANG METASTASIS OF BREAST CANCER ESR1 UP                                     | 19  | 0.868252 | 2.121269 | <0.0001  | 9.65E-04 |
| KEGG GLYOXYLATE AND DICARBOXYLATE METABOLISM                                 | 16  | 0.79552  | 2.119847 | <0.0001  | 9.66E-04 |
| REACTOME REGULATION OF MRNA STABILITY BY PROTEINS THAT BIND AU RICH ELEMENTS | 81  | 0.679395 | 2.116998 | <0.0001  | 0.001002 |
| GROSS HYPOXIA VIA HIF1A UP                                                   | 75  | 0.578038 | 2.113984 | <0.0001  | 0.001046 |
| PID P73PATHWAY                                                               | 76  | 0.546559 | 2.113903 | <0.0001  | 0.001046 |
| VANTVEER BREAST CANCER POOR PROGNOSIS                                        | 50  | 0.620932 | 2.113634 | <0.0001  | 0.001042 |
| MOREAUX B LYMPHOCYTE MATURATION BY TACI DN                                   | 66  | 0.700655 | 2.113578 | <0.0001  | 0.001038 |
| SCHLOSSER MYC TARGETS AND SERUM RESPONSE DN                                  | 45  | 0.73432  | 2.113182 | <0.0001  | 0.001034 |
| WHITFIELD CELL CYCLE LITERATURE                                              | 44  | 0.931355 | 2.112671 | <0.0001  | 0.001036 |
| PUJANA BREAST CANCER WITH BRCA1 MUTATED UP                                   | 54  | 0.854136 | 2.112227 | <0.0001  | 0.001033 |
| SAKAI TUMOR INFILTRATING MONOCYTES DN                                        | 79  | 0.618208 | 2.10654  | <0.0001  | 0.001142 |
| REACTOME M G1 TRANSITION                                                     | 78  | 0.812148 | 2.104081 | <0.0001  | 0.001177 |
| PEART HDAC PROLIFERATION CLUSTER UP                                          | 55  | 0.589599 | 2.103211 | <0.0001  | 0.001189 |
| UDAYAKUMAR MED1 TARGETS UP                                                   | 129 | 0.558246 | 2.102839 | <0.0001  | 0.001196 |
| REACTOME E2F MEDIATED REGULATION OF DNA REPLICATION                          | 33  | 0.822152 | 2.102608 | <0.0001  | 0.001191 |
| BOHN PRIMARY IMMUNODEFICIENCY SYNDROM UP                                     | 45  | 0.643281 | 2.102323 | <0.0001  | 0.001193 |
| REACTOME REGULATION OF MITOTIC CELL CYCLE                                    | 77  | 0.769912 | 2.101265 | <0.0001  | 0.001216 |
| CREIGHTON ENDOCRINE THERAPY RESISTANCE 1                                     | 483 | 0.461744 | 2.100401 | <0.0001  | 0.00124  |
| MENSSEN MYC TARGETS                                                          | 51  | 0.734766 | 2.099857 | <0.0001  | 0.001235 |
| YU MYC TARGETS UP                                                            | 39  | 0.873541 | 2.098673 | <0.0001  | 0.001261 |
| REACTOME DNA STRAND ELONGATION                                               | 30  | 0.936188 | 2.09486  | <0.0001  | 0.001293 |
| CAIRO PML TARGETS BOUND BY MYC UP                                            | 23  | 0.74116  | 2.093349 | 0.001901 | 0.001323 |
| BROWNE HCMV INFECTION 2HR DN                                                 | 48  | 0.638631 | 2.092457 | <0.0001  | 0.001333 |
| ISHIDA E2F TARGETS                                                           | 50  | 0.924752 | 2.090796 | <0.0001  | 0.001362 |
| PID TELOMERASE PATHWAY                                                       | 67  | 0.551803 | 2.090329 | <0.0001  | 0.001366 |
| TOMIDA METASTASIS UP                                                         | 26  | 0.704411 | 2.089387 | <0.0001  | 0.001391 |



|                                                                                          |     |          |          |          |          |
|------------------------------------------------------------------------------------------|-----|----------|----------|----------|----------|
| GENTILE UV HIGH DOSE DN                                                                  | 300 | 0.495146 | 2.087322 | <0.0001  | 0.001439 |
| KANG DOXORUBICIN RESISTANCE UP                                                           | 50  | 0.969963 | 2.086468 | <0.0001  | 0.001453 |
| REACTOME EXTENSION OF TELOMERES                                                          | 27  | 0.888351 | 2.086108 | <0.0001  | 0.001452 |
| REACTOME METABOLISM OF NON CODING RNA                                                    | 47  | 0.746002 | 2.085503 | <0.0001  | 0.001459 |
| HESS TARGETS OF HOXA9 AND MEIS1 UP                                                       | 63  | 0.611456 | 2.083679 | <0.0001  | 0.001482 |
| KAMMINGA EZH2 TARGETS                                                                    | 41  | 0.887804 | 2.082433 | <0.0001  | 0.00152  |
| BOYLAN MULTIPLE MYELOMA C CLUSTER UP                                                     | 37  | 0.603551 | 2.077402 | <0.0001  | 0.001679 |
| WELCSH BRCA1 TARGETS DN                                                                  | 139 | 0.60383  | 2.075231 | <0.0001  | 0.00174  |
| ZUCCHI METASTASIS UP                                                                     | 38  | 0.633629 | 2.074429 | <0.0001  | 0.001758 |
| COLLER MYC TARGETS UP                                                                    | 25  | 0.805873 | 2.074426 | <0.0001  | 0.001752 |
| MALONEY RESPONSE TO 17AAG DN                                                             | 76  | 0.703893 | 2.071679 | <0.0001  | 0.001831 |
| REACTOME ORC1 REMOVAL FROM CHROMATIN                                                     | 65  | 0.789897 | 2.070334 | <0.0001  | 0.001878 |
| CHEN ETV5 TARGETS TESTIS                                                                 | 21  | 0.813166 | 2.070266 | <0.0001  | 0.001872 |
| ELVIDGE HYPOXIA DN                                                                       | 136 | 0.551501 | 2.070224 | <0.0001  | 0.001865 |
| REACTOME ANTIGEN PROCESSING UBIQUITINATION PROTEASOME DEGRADATION                        | 192 | 0.532812 | 2.069091 | <0.0001  | 0.001873 |
| REACTOME ACTIVATION OF ATR IN RESPONSE TO REPLICATION STRESS                             | 35  | 0.863226 | 2.068907 | <0.0001  | 0.001872 |
| REACTOME GLUCOSE TRANSPORT                                                               | 37  | 0.685209 | 2.068649 | <0.0001  | 0.001873 |
| REACTOME INTERACTIONS OF VPR WITH HOST CELLULAR PROTEINS                                 | 31  | 0.726966 | 2.067803 | <0.0001  | 0.00187  |
| KEGG NUCLEOTIDE EXCISION REPAIR                                                          | 44  | 0.669161 | 2.067488 | <0.0001  | 0.001875 |
| JIANG VHL TARGETS                                                                        | 130 | 0.517253 | 2.06359  | <0.0001  | 0.001974 |
| SESTO RESPONSE TO UV C2                                                                  | 53  | 0.614701 | 2.062638 | <0.0001  | 0.001993 |
| SMITH TERT TARGETS UP                                                                    | 141 | 0.521705 | 2.062025 | <0.0001  | 0.002006 |
| ZHANG RESPONSE TO CANTHARIDIN DN                                                         | 67  | 0.692448 | 2.061692 | <0.0001  | 0.00201  |
| GROSS HYPOXIA VIA ELK3 AND HIF1A DN                                                      | 100 | 0.495645 | 2.059332 | <0.0001  | 0.002081 |
| LAU APOPTOSIS CDKN2A UP                                                                  | 55  | 0.554561 | 2.059272 | <0.0001  | 0.00208  |
| BOYLAN MULTIPLE MYELOMA C D UP                                                           | 129 | 0.487256 | 2.059213 | 0.001869 | 0.00208  |
| COLINA TARGETS OF 4EBP1 AND 4EBP2                                                        | 346 | 0.457786 | 2.058174 | <0.0001  | 0.002094 |
| SA G1 AND S PHASES                                                                       | 15  | 0.772091 | 2.057796 | <0.0001  | 0.002098 |
| REACTOME APC CDC20 MEDIATED DEGRADATION OF NEK2A                                         | 21  | 0.803027 | 2.057293 | <0.0001  | 0.002107 |
| ZHAN MULTIPLE MYELOMA SUBGROUPS                                                          | 30  | 0.812947 | 2.054572 | <0.0001  | 0.002188 |
| REACTOME ASSEMBLY OF THE PRE REPLICATIVE COMPLEX                                         | 63  | 0.797598 | 2.053254 | <0.0001  | 0.002203 |
| REACTOME DESTABILIZATION OF MRNA BY KSRP                                                 | 17  | 0.723084 | 2.052988 | <0.0001  | 0.002223 |
| REACTOME PROCESSING OF CAPPED INTRONLESS PRE MRNA                                        | 23  | 0.762658 | 2.052226 | <0.0001  | 0.002236 |
| CAFFAREL RESPONSE TO THC 24HR 5 DN                                                       | 55  | 0.646964 | 2.051117 | <0.0001  | 0.002257 |
| XU HGF TARGETS INDUCED BY AKT1 48HR DN                                                   | 24  | 0.7635   | 2.050982 | <0.0001  | 0.002253 |
| REACTOME HOMOLOGOUS RECOMBINATION REPAIR OF REPLICATION INDEPENDENT DOUBLE STRAND BREAKS | 15  | 0.849603 | 2.050763 | <0.0001  | 0.002252 |
| REACTOME G1 S SPECIFIC TRANSCRIPTION                                                     | 17  | 0.912568 | 2.048748 | <0.0001  | 0.002308 |
| REACTOME INHIBITION OF THE PROTEOLYTIC ACTIVITY OF APC C REQUIRED FOR THE ONSET          | 18  | 0.810243 | 2.046922 | <0.0001  | 0.002368 |

|                                                                         |     |          |          |          |          |
|-------------------------------------------------------------------------|-----|----------|----------|----------|----------|
| OF ANAPHASE BY MITOTIC SPINDLE CHECKPOINT COMPONENTS                    |     |          |          |          |          |
| WHITFIELD CELL CYCLE M G1                                               | 140 | 0.522131 | 2.046846 | <0.0001  | 0.002361 |
| REACTOME PROTEIN FOLDING                                                | 51  | 0.613705 | 2.046436 | <0.0001  | 0.002382 |
| WANG RECURRENT LIVER CANCER UP                                          | 20  | 0.689945 | 2.046239 | 0.002008 | 0.002388 |
| WANG SMARCE1 TARGETS DN                                                 | 348 | 0.482716 | 2.045934 | <0.0001  | 0.002388 |
| REACTOME GLOBAL GENOMIC NER GG NER                                      | 32  | 0.689242 | 2.044657 | <0.0001  | 0.002436 |
| RAMASWAMY METASTASIS UP                                                 | 64  | 0.569826 | 2.043841 | <0.0001  | 0.002466 |
| PID BARD1 PATHWAY                                                       | 28  | 0.774452 | 2.043128 | <0.0001  | 0.002475 |
| GRADE METASTASIS DN                                                     | 42  | 0.719103 | 2.042831 | <0.0001  | 0.00247  |
| REACTOME KINESINS                                                       | 23  | 0.797284 | 2.0425   | <0.0001  | 0.002469 |
| PENG GLUCOSE DEPRIVATION DN                                             | 163 | 0.478019 | 2.041977 | <0.0001  | 0.002476 |
| SCIAN CELL CYCLE TARGETS OF TP53 AND TP73 DN                            | 22  | 0.917159 | 2.041899 | <0.0001  | 0.002468 |
| REACTOME APOPTOSIS                                                      | 141 | 0.538101 | 2.039866 | <0.0001  | 0.002512 |
| LI WILMS TUMOR VS FETAL KIDNEY 2 UP                                     | 29  | 0.689273 | 2.039436 | <0.0001  | 0.002519 |
| REACTOME CLASS I MHC MEDIATED ANTIGEN PROCESSING PRESENTATION           | 229 | 0.503016 | 2.03856  | <0.0001  | 0.002556 |
| LOCKWOOD AMPLIFIED IN LUNG CANCER                                       | 205 | 0.552248 | 2.03668  | <0.0001  | 0.002621 |
| SMID BREAST CANCER LUMINAL A DN                                         | 18  | 0.908947 | 2.035796 | <0.0001  | 0.002651 |
| REACTOME TRANSPORT OF MATURE MRNA DERIVED FROM AN INTRONLESS TRANSCRIPT | 31  | 0.749502 | 2.03298  | <0.0001  | 0.002761 |
| ZHAN VARIABLE EARLY DIFFERENTIATION GENES DN                            | 30  | 0.660245 | 2.028145 | <0.0001  | 0.002932 |
| JI RESPONSE TO FSH DN                                                   | 57  | 0.623213 | 2.028099 | <0.0001  | 0.002924 |
| YAO TEMPORAL RESPONSE TO PROGESTERONE CLUSTER 14                        | 134 | 0.612467 | 2.02692  | <0.0001  | 0.002937 |
| ONDER CDH1 TARGETS 1 DN                                                 | 163 | 0.533362 | 2.026353 | <0.0001  | 0.002937 |
| OUELLET CULTURED OVARIAN CANCER INVASIVE VS LMP UP                      | 65  | 0.598103 | 2.025944 | <0.0001  | 0.002948 |
| DITTMER PTHLH TARGETS UP                                                | 110 | 0.535257 | 2.023349 | <0.0001  | 0.003051 |
| REACTOME TRANSPORT OF RIBONUCLEOPROTEINS INTO THE HOST NUCLEUS          | 26  | 0.770843 | 2.020681 | <0.0001  | 0.003144 |
| REACTOME FANCONI ANEMIA PATHWAY                                         | 19  | 0.818275 | 2.020279 | <0.0001  | 0.003147 |
| ZHAN MULTIPLE MYELOMA PR UP                                             | 43  | 0.941423 | 2.017984 | <0.0001  | 0.003246 |
| REACTOME G0 AND EARLY G1                                                | 23  | 0.785373 | 2.017868 | <0.0001  | 0.003236 |
| REACTOME PHOSPHORYLATION OF THE APC C                                   | 17  | 0.805142 | 2.017592 | <0.0001  | 0.003237 |
| MONNIER POSTRADIATION TUMOR ESCAPE UP                                   | 374 | 0.46462  | 2.015753 | <0.0001  | 0.003323 |
| BROWNE HCMV INFECTION 14HR UP                                           | 151 | 0.469168 | 2.01557  | <0.0001  | 0.003323 |
| CAFFAREL RESPONSE TO THC 24HR 5 UP                                      | 30  | 0.691348 | 2.015313 | <0.0001  | 0.003334 |
| REACTOME GLYCOLYSIS                                                     | 25  | 0.713664 | 2.015109 | <0.0001  | 0.003325 |
| MODY HIPPOCAMPUS NEONATAL                                               | 35  | 0.667014 | 2.012279 | <0.0001  | 0.003439 |
| REACTOME NEP NS2 INTERACTS WITH THE CELLULAR EXPORT MACHINERY           | 26  | 0.770374 | 2.010113 | <0.0001  | 0.003513 |
| JEON SMAD6 TARGETS DN                                                   | 19  | 0.766636 | 2.009998 | <0.0001  | 0.003511 |
| KEGG BASAL TRANSCRIPTION FACTORS                                        | 35  | 0.618564 | 2.009835 | <0.0001  | 0.003516 |
| BURTON ADIPOGENESIS 4                                                   | 44  | 0.604536 | 2.009718 | <0.0001  | 0.003512 |
| IIZUKA LIVER CANCER PROGRESSION G1 G2 DN                                | 24  | 0.707872 | 2.007686 | <0.0001  | 0.003591 |

|                                                                                                                   |     |          |          |          |          |
|-------------------------------------------------------------------------------------------------------------------|-----|----------|----------|----------|----------|
| REACTOME G1 PHASE                                                                                                 | 35  | 0.609747 | 2.007339 | <0.0001  | 0.003595 |
| REACTOME CYCLIN E ASSOCIATED EVENTS DURING G1 S TRANSITION                                                        | 62  | 0.760446 | 2.003888 | <0.0001  | 0.003722 |
| REACTOME LAGGING STRAND SYNTHESIS                                                                                 | 19  | 0.912678 | 2.001485 | <0.0001  | 0.003821 |
| LEE METASTASIS AND RNA PROCESSING UP                                                                              | 17  | 0.800433 | 2.001459 | <0.0001  | 0.00381  |
| REACTOME TRNA AMINOACYLATION                                                                                      | 42  | 0.711867 | 2.001071 | 0.001949 | 0.003811 |
| REACTOME APC C CDC20 MEDIATED DEGRADATION OF MITOTIC PROTEINS                                                     | 65  | 0.769685 | 2.000939 | <0.0001  | 0.0038   |
| PID MYC PATHWAY                                                                                                   | 25  | 0.65387  | 2.000677 | <0.0001  | 0.003803 |
| KEGG ONE CARBON POOL BY FOLATE                                                                                    | 17  | 0.728533 | 2.000255 | <0.0001  | 0.003818 |
| REACTOME APC C CDH1 MEDIATED DEGRADATION OF CDC20 AND OTHER APC C CDH1 TARGETED PROTEINS IN LATE MITOSIS EARLY G1 | 64  | 0.76339  | 2.000174 | <0.0001  | 0.003815 |
| SYED ESTRADIOL RESPONSE                                                                                           | 19  | 0.648783 | 2.000123 | <0.0001  | 0.003805 |
| PELLICCIOTTA HDAC IN ANTIGEN PRESENTATION DN                                                                      | 49  | 0.698881 | 1.999564 | <0.0001  | 0.003812 |
| SCHLOSSER MYC TARGETS AND SERUM RESPONSE UP                                                                       | 46  | 0.667446 | 1.999523 | <0.0001  | 0.003804 |
| REACTOME REGULATION OF GLUCOKINASE BY GLUCOKINASE REGULATORY PROTEIN                                              | 26  | 0.736698 | 1.99843  | <0.0001  | 0.003854 |
| REACTOME APC C CDC20 MEDIATED DEGRADATION OF CYCLIN B                                                             | 19  | 0.781983 | 1.997508 | <0.0001  | 0.003898 |
| KORKOLA TERATOMA                                                                                                  | 39  | 0.58834  | 1.997485 | <0.0001  | 0.003888 |
| KEGG BASE EXCISION REPAIR                                                                                         | 33  | 0.677559 | 1.996618 | <0.0001  | 0.003921 |
| PID P53 REGULATION PATHWAY                                                                                        | 57  | 0.542067 | 1.996203 | <0.0001  | 0.003925 |
| GENTLES LEUKEMIC STEM CELL DN                                                                                     | 18  | 0.741592 | 1.994287 | <0.0001  | 0.004038 |
| REACTOME ACTIVATION OF THE PRE REPLICATIVE COMPLEX                                                                | 30  | 0.886114 | 1.993903 | <0.0001  | 0.004046 |
| BENPORATH MYC TARGETS WITH EBOX                                                                                   | 219 | 0.464298 | 1.992622 | <0.0001  | 0.004141 |
| CONCANNON APOPTOSIS BY EPOXOMICIN DN                                                                              | 159 | 0.504678 | 1.992043 | <0.0001  | 0.004163 |
| REACTOME DEADENYLATION DEPENDENT MRNA DECAY                                                                       | 42  | 0.609905 | 1.990957 | <0.0001  | 0.004195 |
| CHANDRAN METASTASIS UP                                                                                            | 191 | 0.476314 | 1.989928 | <0.0001  | 0.004235 |
| GROSS HYPOXIA VIA ELK3 ONLY DN                                                                                    | 41  | 0.542787 | 1.989453 | <0.0001  | 0.004254 |
| PIONTEK PKD1 TARGETS DN                                                                                           | 16  | 0.734789 | 1.98645  | <0.0001  | 0.004382 |
| REACTOME RNA POL II PRE TRANSCRIPTION EVENTS                                                                      | 51  | 0.61407  | 1.985118 | <0.0001  | 0.004436 |
| BIOCARTA P53 PATHWAY                                                                                              | 16  | 0.689432 | 1.984748 | <0.0001  | 0.004457 |
| REACTOME CYCLIN A B1 ASSOCIATED EVENTS DURING G2 M TRANSITION                                                     | 15  | 0.890008 | 1.983267 | <0.0001  | 0.00454  |
| CAFFAREL RESPONSE TO THC DN                                                                                       | 29  | 0.72461  | 1.983187 | <0.0001  | 0.004528 |
| ZHU CMV 24 HR UP                                                                                                  | 93  | 0.534773 | 1.982943 | 0.003945 | 0.004527 |
| BILD MYC ONCOGENIC SIGNATURE                                                                                      | 187 | 0.489565 | 1.982282 | <0.0001  | 0.00457  |
| REACTOME P53 DEPENDENT G1 DNA DAMAGE RESPONSE                                                                     | 53  | 0.756949 | 1.982095 | <0.0001  | 0.004573 |
| WATANABE COLON CANCER MSI VS MSS UP                                                                               | 27  | 0.607195 | 1.98154  | 0.002004 | 0.004596 |
| REACTOME POST CHAPERONIN TUBULIN FOLDING PATHWAY                                                                  | 18  | 0.726923 | 1.980388 | <0.0001  | 0.004684 |

|                                                             |     |          |          |          |          |
|-------------------------------------------------------------|-----|----------|----------|----------|----------|
| REACTOME DOWNSTREAM SIGNALING EVENTS OF B CELL RECEPTOR BCR | 92  | 0.571358 | 1.976775 | <0.0001  | 0.004906 |
| MEINHOLD OVARIAN CANCER LOW GRADE DN                        | 20  | 0.783624 | 1.976286 | <0.0001  | 0.004933 |
| ACOSTA PROLIFERATION INDEPENDENT MYC TARGETS UP             | 75  | 0.542673 | 1.975191 | <0.0001  | 0.004988 |
| REACTOME CHROMOSOME MAINTENANCE                             | 112 | 0.708597 | 1.97397  | <0.0001  | 0.005049 |
| CHIARETTI T ALL RELAPSE PROGNOSIS                           | 19  | 0.731396 | 1.973693 | <0.0001  | 0.005061 |
| SANSOM APC TARGETS REQUIRE MYC                              | 192 | 0.501999 | 1.971123 | 0.001957 | 0.005223 |
| BIOCARTA MCM PATHWAY                                        | 18  | 0.872747 | 1.970971 | <0.0001  | 0.005226 |
| KOKKINAKIS METHIONINE DEPRIVATION 48HR DN                   | 64  | 0.497033 | 1.969555 | <0.0001  | 0.005352 |
| WIERENGA PML INTERACTOME                                    | 40  | 0.599121 | 1.969317 | <0.0001  | 0.005352 |
| MATZUK MEIOTIC AND DNA REPAIR                               | 35  | 0.605038 | 1.968969 | <0.0001  | 0.005362 |
| XU RESPONSE TO TRETINOIN AND NSC682994 DN                   | 15  | 0.832366 | 1.968602 | <0.0001  | 0.005369 |
| REACTOME PROGRESSIVE SYNTHESIS ON THE LAGGING STRAND        | 15  | 0.902101 | 1.968406 | <0.0001  | 0.005368 |
| REACTOME MRNA SPLICING MINOR PATHWAY                        | 40  | 0.699261 | 1.966838 | <0.0001  | 0.005464 |
| BIOCARTA ATRBRCA PATHWAY                                    | 19  | 0.77449  | 1.966438 | 0.001972 | 0.005476 |
| REACTOME TRANSCRIPTION COUPLED NER TC NER                   | 43  | 0.643506 | 1.966286 | <0.0001  | 0.005474 |
| BIOCARTA ATM PATHWAY                                        | 19  | 0.666483 | 1.963068 | 0.003891 | 0.005704 |
| WANG TUMOR INVASIVENESS UP                                  | 362 | 0.488607 | 1.962343 | <0.0001  | 0.005732 |
| REACTOME CDT1 ASSOCIATION WITH THE CDC6 ORC ORIGIN COMPLEX  | 54  | 0.776762 | 1.959886 | <0.0001  | 0.005951 |
| WATANABE RECTAL CANCER RADIOTHERAPY RESPONSIVE DN           | 89  | 0.520094 | 1.959482 | <0.0001  | 0.005965 |
| REACTOME MRNA 3 END PROCESSING                              | 33  | 0.679651 | 1.956331 | <0.0001  | 0.00621  |
| REACTOME ER PHAGOSOME PATHWAY                               | 58  | 0.741241 | 1.954467 | <0.0001  | 0.00632  |
| JAIN NFkB SIGNALING                                         | 71  | 0.522714 | 1.954157 | <0.0001  | 0.006335 |
| MATZUK SPERMATOCYTE                                         | 68  | 0.523811 | 1.953535 | 0.002045 | 0.00639  |
| REACTOME ACTIVATION OF NF KAPPAB IN B CELLS                 | 61  | 0.671809 | 1.951526 | <0.0001  | 0.006542 |
| KENNY CTNNB1 TARGETS UP                                     | 46  | 0.513427 | 1.951432 | <0.0001  | 0.006536 |
| KEGG RNA DEGRADATION                                        | 56  | 0.595992 | 1.950491 | 0.001946 | 0.006594 |
| YUAN ZNF143 PARTNERS                                        | 21  | 0.744772 | 1.949539 | <0.0001  | 0.006656 |
| REACTOME P53 INDEPENDENT G1 S DNA DAMAGE CHECKPOINT         | 48  | 0.768678 | 1.949339 | <0.0001  | 0.006649 |
| VANHARANTA UTERINE FIBROID WITH 7Q DELETION UP              | 65  | 0.541866 | 1.948349 | <0.0001  | 0.006701 |
| GENTILE UV RESPONSE CLUSTER D4                              | 54  | 0.571648 | 1.948278 | 0.003861 | 0.006693 |
| HU GENOTOXIN ACTION DIRECT VS INDIRECT 24HR                 | 51  | 0.541123 | 1.944962 | 0.001992 | 0.00694  |
| MORI SMALL PRE BII LYMPHOCYTE DN                            | 74  | 0.501234 | 1.944481 | <0.0001  | 0.006965 |
| NEMETH INFLAMMATORY RESPONSE LPS DN                         | 32  | 0.571956 | 1.944177 | <0.0001  | 0.006981 |
| REACTOME ACTIVATION OF GENES BY ATF4                        | 23  | 0.649837 | 1.944107 | 0.001942 | 0.006965 |
| FARMER BREAST CANCER CLUSTER 2                              | 32  | 0.902986 | 1.94364  | <0.0001  | 0.00698  |
| SIG REGULATION OF THE ACTIN CYTOSKELETON BY RHO GTPASES     | 34  | 0.608855 | 1.943536 | 0.001988 | 0.006971 |

|                                                                     |     |          |          |          |          |
|---------------------------------------------------------------------|-----|----------|----------|----------|----------|
| CHICAS RB1 TARGETS LOW SERUM                                        | 84  | 0.598081 | 1.942853 | 0.00396  | 0.007041 |
| EGUCHI CELL CYCLE RB1 TARGETS                                       | 23  | 0.975887 | 1.942104 | <0.0001  | 0.007079 |
| REACTOME NUCLEOTIDE EXCISION REPAIR                                 | 48  | 0.604088 | 1.940962 | <0.0001  | 0.007171 |
| DEN INTERACT WITH LCA5                                              | 25  | 0.718446 | 1.940296 | 0.002008 | 0.007208 |
| REACTOME SCFSKP2 MEDIATED DEGRADATION OF P27 P21                    | 53  | 0.76694  | 1.93972  | <0.0001  | 0.007227 |
| RASHI RESPONSE TO IONIZING RADIATION 4                              | 57  | 0.481413 | 1.938123 | <0.0001  | 0.007375 |
| KEGG PROTEASOME                                                     | 42  | 0.79173  | 1.937408 | <0.0001  | 0.007424 |
| REACTOME SIGNALING BY WNT                                           | 62  | 0.670359 | 1.937027 | <0.0001  | 0.007443 |
| FERRANDO HOX11 NEIGHBORS                                            | 23  | 0.696814 | 1.933924 | <0.0001  | 0.00775  |
| ENK UV RESPONSE EPIDERMIS UP                                        | 277 | 0.457797 | 1.933273 | <0.0001  | 0.007792 |
| YIH RESPONSE TO ARSENITE C3                                         | 35  | 0.575493 | 1.932845 | <0.0001  | 0.007816 |
| BROWN MYELOID CELL DEVELOPMENT DN                                   | 119 | 0.469508 | 1.931227 | <0.0001  | 0.007934 |
| KEGG AMINOACYL TRNA BIOSYNTHESIS                                    | 41  | 0.664378 | 1.92947  | 0.001949 | 0.008054 |
| KUROKAWA LIVER CANCER CHEMOTHERAPY DN                               | 39  | 0.533797 | 1.929205 | <0.0001  | 0.008054 |
| REACTOME CROSS PRESENTATION OF SOLUBLE EXOGENOUS ANTIGENS ENDOSOMES | 47  | 0.73592  | 1.928998 | <0.0001  | 0.008061 |
| MATSUDA NATURAL KILLER DIFFERENTIATION                              | 455 | 0.391869 | 1.927797 | <0.0001  | 0.008176 |
| REACTOME CONVERSION FROM APC C CDC20 TO APC C CDH1 IN LATE ANAPHASE | 16  | 0.733423 | 1.926299 | <0.0001  | 0.008318 |
| REACTOME ANTIGEN PROCESSING CROSS PRESENTATION                      | 72  | 0.651251 | 1.926095 | 0.006    | 0.008316 |
| REACTOME SCF BETA TRCP MEDIATED DEGRADATION OF EMI1                 | 49  | 0.759775 | 1.925905 | <0.0001  | 0.008309 |
| REACTOME CYTOSOLIC TRNA AMINOACYLATION                              | 24  | 0.785252 | 1.924682 | <0.0001  | 0.008394 |
| COLDREN GEFITINIB RESISTANCE UP                                     | 74  | 0.543114 | 1.92393  | 0.00189  | 0.008452 |
| REACTOME AUTODEGRADATION OF THE E3 UBIQUITIN LIGASE COP1            | 47  | 0.754595 | 1.923379 | <0.0001  | 0.008487 |
| CHIANG LIVER CANCER SUBCLASS UNANNOTATED DN                         | 182 | 0.637495 | 1.922617 | 0.002053 | 0.008547 |
| REACTOME REGULATION OF ORNITHINE DECARBOXYLASE ODC                  | 48  | 0.751893 | 1.92241  | <0.0001  | 0.008549 |
| SANSOM APC TARGETS UP                                               | 113 | 0.461648 | 1.919507 | <0.0001  | 0.008791 |
| REACTOME VIF MEDIATED DEGRADATION OF APOBEC3G                       | 47  | 0.762261 | 1.917384 | <0.0001  | 0.009031 |
| TSENG IRS1 TARGETS UP                                               | 106 | 0.472892 | 1.915718 | <0.0001  | 0.009167 |
| REACTOME DESTABILIZATION OF MRNA BY AUF1 HNRNP D0                   | 50  | 0.752287 | 1.915214 | <0.0001  | 0.009199 |
| REACTOME INTRINSIC PATHWAY FOR APOPTOSIS                            | 29  | 0.600553 | 1.914255 | <0.0001  | 0.009254 |
| SESTO RESPONSE TO UV C1                                             | 72  | 0.566347 | 1.910846 | <0.0001  | 0.009574 |
| DORMOY ELAVL1 TARGETS                                               | 16  | 0.682283 | 1.910761 | 0.001927 | 0.009561 |
| KOINUMA COLON CANCER MSI UP                                         | 16  | 0.715851 | 1.908732 | <0.0001  | 0.009769 |
| DOANE BREAST CANCER CLASSES DN                                      | 32  | 0.619728 | 1.908547 | <0.0001  | 0.009768 |
| REACTOME DESTABILIZATION OF MRNA BY BRP1                            | 17  | 0.654997 | 1.907987 | 0.001848 | 0.009807 |
| YAO TEMPORAL RESPONSE TO PROGESTERONE                               | 64  | 0.616165 | 1.907875 | 0.004    | 0.0098   |

|                                                                                |     |          |          |          |          |
|--------------------------------------------------------------------------------|-----|----------|----------|----------|----------|
| CLUSTER 10                                                                     |     |          |          |          |          |
| MULLIGAN NTF3 SIGNALING VIA INSR AND IGF1R UP                                  | 23  | 0.674026 | 1.907528 | 0.004073 | 0.009816 |
| WEIGEL OXIDATIVE STRESS BY HNE AND H2O2                                        | 39  | 0.528866 | 1.907318 | 0.001866 | 0.00981  |
| HEDENFALK BREAST CANCER HEREDITARY VS SPORADIC                                 | 46  | 0.558058 | 1.906911 | 0.007752 | 0.009844 |
| FINETTI BREAST CANCER KINOME RED                                               | 16  | 0.977441 | 1.905571 | <0.0001  | 0.009981 |
| REACTOME BASE EXCISION REPAIR                                                  | 19  | 0.739324 | 1.905297 | 0.002049 | 0.009984 |
| CHANDRAN METASTASIS TOP50 UP                                                   | 34  | 0.612386 | 1.903234 | 0.005725 | 0.010219 |
| REACTOME AUTODEGRADATION OF CDH1 BY CDH1 APC C                                 | 56  | 0.736882 | 1.902159 | <0.0001  | 0.010342 |
| REACTOME CDK MEDIATED PHOSPHORYLATION AND REMOVAL OF CDC6                      | 46  | 0.772232 | 1.901237 | <0.0001  | 0.010409 |
| REACTOME FACTORS INVOLVED IN MEGAKARYOCYTE DEVELOPMENT AND PLATELET PRODUCTION | 111 | 0.477751 | 1.900891 | 0.001862 | 0.010433 |
| LIU SOX4 TARGETS DN                                                            | 293 | 0.425654 | 1.899944 | <0.0001  | 0.010537 |
| LY AGING MIDDLE DN                                                             | 16  | 0.95546  | 1.89984  | <0.0001  | 0.010535 |
| VANDESLUIS COMMD1 TARGETS GROUP 2 UP                                           | 15  | 0.700928 | 1.899336 | <0.0001  | 0.010589 |
| PID RB 1PATHWAY                                                                | 65  | 0.495654 | 1.898447 | <0.0001  | 0.010653 |
| RAMALHO STEMNESS UP                                                            | 196 | 0.510455 | 1.898378 | <0.0001  | 0.010639 |
| IVANOVA HEMATOPOIESIS EARLY PROGENITOR                                         | 489 | 0.413678 | 1.898225 | <0.0001  | 0.010635 |
| REACTOME PERK REGULATED GENE EXPRESSION                                        | 26  | 0.629411 | 1.897715 | 0.003929 | 0.010675 |
| XU CREBBP TARGETS UP                                                           | 24  | 0.619434 | 1.897401 | 0.004098 | 0.010703 |
| KEGG PYRIMIDINE METABOLISM                                                     | 96  | 0.530047 | 1.897114 | 0.002004 | 0.010748 |
| ZHANG RESPONSE TO IKK INHIBITOR AND TNF DN                                     | 100 | 0.482826 | 1.894291 | <0.0001  | 0.011084 |
| REACTOME REGULATION OF APOPTOSIS                                               | 56  | 0.67096  | 1.892199 | <0.0001  | 0.011324 |
| MARIADASON RESPONSE TO BUTYRATE SULINDAC 4                                     | 21  | 0.626318 | 1.886468 | 0.007505 | 0.01197  |
| BOYLAN MULTIPLE MYELOMA C UP                                                   | 44  | 0.525693 | 1.886409 | 0.002    | 0.011955 |
| SPIELMAN LYMPHOBLAST EUROPEAN VS ASIAN UP                                      | 467 | 0.475123 | 1.886162 | 0.004008 | 0.011957 |
| APRELIKOVA BRCA1 TARGETS                                                       | 48  | 0.542382 | 1.884366 | <0.0001  | 0.012183 |
| KEGG P53 SIGNALING PATHWAY                                                     | 66  | 0.501395 | 1.884289 | 0.002024 | 0.012186 |
| LI LUNG CANCER                                                                 | 41  | 0.583701 | 1.882349 | 0.00396  | 0.012429 |
| GARGALOVIC RESPONSE TO OXIDIZED PHOSPHOLIPIDS RED UP                           | 16  | 0.720694 | 1.878118 | <0.0001  | 0.013061 |
| KEGG PATHOGENIC ESCHERICHIA COLI INFECTION                                     | 55  | 0.532179 | 1.877661 | <0.0001  | 0.01311  |
| MODY HIPPOCAMPUS PRENATAL                                                      | 42  | 0.650805 | 1.870974 | 0.007921 | 0.014078 |
| GENTILE UV RESPONSE CLUSTER D5                                                 | 37  | 0.564963 | 1.868872 | 0.003953 | 0.01439  |
| HEIDENBLAD AMPLICON 8Q24 UP                                                    | 34  | 0.551487 | 1.868355 | 0.005837 | 0.014466 |
| CUI GLUCOSE DEPRIVATION                                                        | 58  | 0.536577 | 1.86644  | 0.002008 | 0.014728 |
| REACTOME METABOLISM OF RNA                                                     | 252 | 0.595407 | 1.866064 | 0.017613 | 0.014747 |
| KRASNOSELSKAYA ILF3 TARGETS DN                                                 | 44  | 0.532651 | 1.865432 | 0.001838 | 0.014835 |
| BROWNE HCMV INFECTION 48HR UP                                                  | 174 | 0.408385 | 1.864636 | <0.0001  | 0.014952 |

|                                                                                       |     |          |          |          |          |
|---------------------------------------------------------------------------------------|-----|----------|----------|----------|----------|
| RIZ ERYTHROID DIFFERENTIATION CCNE1                                                   | 39  | 0.527737 | 1.864409 | <0.0001  | 0.014961 |
| KIM MYC AMPLIFICATION TARGETS UP                                                      | 186 | 0.480248 | 1.863497 | 0.009671 | 0.015054 |
| KAN RESPONSE TO ARSENIC TRIOXIDE                                                      | 118 | 0.483835 | 1.863214 | 0.002    | 0.015059 |
| ZHU CMV ALL UP                                                                        | 119 | 0.490735 | 1.862534 | 0.009921 | 0.015126 |
| SHAFFER IRF4 TARGETS IN ACTIVATED DENDRITIC CELL                                      | 61  | 0.532159 | 1.86247  | 0.004    | 0.015104 |
| PEDERSEN METASTASIS BY ERBB2 ISOFORM 7                                                | 362 | 0.399591 | 1.862343 | <0.0001  | 0.015087 |
| JAZAG TGFB1 SIGNALING UP                                                              | 104 | 0.435221 | 1.858454 | <0.0001  | 0.015694 |
| IRITANI MAD1 TARGETS DN                                                               | 46  | 0.674364 | 1.856611 | 0.007952 | 0.015947 |
| BACOLOD RESISTANCE TO ALKYLATING AGENTS DN                                            | 57  | 0.504122 | 1.856493 | <0.0001  | 0.015935 |
| RAY TUMORIGENESIS BY ERBB2 CDC25A UP                                                  | 99  | 0.427637 | 1.851589 | <0.0001  | 0.016772 |
| NAGY TFTC COMPONENTS HUMAN                                                            | 18  | 0.647464 | 1.851249 | 0.001876 | 0.016792 |
| SAKAI CHRONIC HEPATITIS VS LIVER CANCER UP                                            | 79  | 0.544747 | 1.84924  | 0.005792 | 0.017096 |
| KIM TIAL1 TARGETS                                                                     | 31  | 0.580682 | 1.847152 | <0.0001  | 0.017428 |
| BIOCARTA TNFR1 PATHWAY                                                                | 29  | 0.5413   | 1.846832 | 0.003922 | 0.017443 |
| BILD E2F3 ONCOGENIC SIGNATURE                                                         | 222 | 0.414029 | 1.844264 | <0.0001  | 0.017951 |
| REACTOME RESOLUTION OF AP SITES VIA THE MULTIPLE NUCLEOTIDE PATCH REPLACEMENT PATHWAY | 17  | 0.743707 | 1.842516 | 0.002062 | 0.018255 |
| CHUNG BLISTER CYTOTOXICITY UP                                                         | 123 | 0.490669 | 1.841934 | 0.006085 | 0.01834  |
| SILIGAN TARGETS OF EWS FLI1 FUSION DN                                                 | 17  | 0.63228  | 1.840749 | 0.005792 | 0.01853  |
| HUANG GATA2 TARGETS DN                                                                | 67  | 0.48036  | 1.83948  | <0.0001  | 0.018738 |
| TOOKER GEMCITABINE RESISTANCE DN                                                      | 119 | 0.481571 | 1.838992 | 0.003945 | 0.018795 |
| AMIT EGF RESPONSE 480 MCF10A                                                          | 40  | 0.531375 | 1.837167 | 0.011905 | 0.019166 |
| YIH RESPONSE TO ARSENITE C1                                                           | 23  | 0.601631 | 1.836536 | 0.009488 | 0.019292 |
| HONMA DOCETAXEL RESISTANCE                                                            | 30  | 0.690476 | 1.835535 | <0.0001  | 0.019472 |
| TIEN INTESTINE PROBIOTICS 2HR DN                                                      | 85  | 0.482602 | 1.835407 | <0.0001  | 0.019456 |
| GOLDRATH HOMEOSTATIC PROLIFERATION                                                    | 163 | 0.489531 | 1.834864 | 0.003976 | 0.019503 |
| REACTOME METABOLISM OF NUCLEOTIDES                                                    | 70  | 0.53433  | 1.834687 | 0.004073 | 0.019491 |
| PODAR RESPONSE TO ADAPHOSTIN DN                                                       | 18  | 0.667153 | 1.834566 | 0.007968 | 0.019468 |
| SHIN B CELL LYMPHOMA CLUSTER 8                                                        | 36  | 0.576272 | 1.834382 | 0.002016 | 0.01946  |
| HASLINGER B CLL WITH CHROMOSOME 12 TRISOMY                                            | 22  | 0.64397  | 1.834308 | 0.001869 | 0.019441 |
| CAIRO HEPATOBLASTOMA UP                                                               | 197 | 0.446128 | 1.833735 | 0.001866 | 0.019541 |
| WANG TARGETS OF MLL CBP FUSION DN                                                     | 42  | 0.546191 | 1.833113 | 0.00404  | 0.01962  |
| IVANOVA HEMATOPOIESIS INTERMEDIATE PROGENITOR                                         | 140 | 0.465495 | 1.832086 | 0.011788 | 0.019779 |
| MACLACHLAN BRCA1 TARGETS UP                                                           | 21  | 0.665682 | 1.831726 | 0.005871 | 0.019823 |
| SCHLOSSER MYC AND SERUM RESPONSE SYNERGY                                              | 31  | 0.673333 | 1.826529 | 0.01232  | 0.020812 |
| BANDRES RESPONSE TO CARMUSTIN MGMT 48HR UP                                            | 18  | 0.593765 | 1.826323 | 0.003774 | 0.020816 |
| FARMER BREAST CANCER BASAL VS LULMINAL                                                | 317 | 0.394212 | 1.825613 | <0.0001  | 0.020906 |
| REACTOME GLUCONEOGENESIS                                                              | 29  | 0.634468 | 1.824592 | 0.008282 | 0.021075 |
| REACTOME DESTABILIZATION OF MRNA BY TRISTETRAPROLIN TTP                               | 17  | 0.646551 | 1.823261 | 0.003636 | 0.021319 |

|                                                                           |     |          |          |          |          |
|---------------------------------------------------------------------------|-----|----------|----------|----------|----------|
| REACTOME AMINO ACID SYNTHESIS AND INTERCONVERSION TRANSAMINATION          | 15  | 0.701215 | 1.822876 | 0.006186 | 0.021362 |
| REACTOME GLUCOSE METABOLISM                                               | 61  | 0.53118  | 1.822558 | 0.004098 | 0.021381 |
| ALFANO MYC TARGETS                                                        | 230 | 0.414119 | 1.820831 | <0.0001  | 0.021726 |
| SHAFFER IRF4 TARGETS IN MYELOMA VS MATURE B LYMPHOCYTE                    | 99  | 0.491022 | 1.819372 | 0.01002  | 0.021983 |
| POMEROY MEDULLOBLASTOMA PROGNOSIS DN                                      | 43  | 0.637588 | 1.818514 | 0.015656 | 0.022116 |
| TAYLOR METHYLATED IN ACUTE LYMPHOBLASTIC LEUKEMIA                         | 73  | 0.485049 | 1.817824 | 0.001894 | 0.022246 |
| BIOCARTA PROTEASOME PATHWAY                                               | 28  | 0.790264 | 1.817397 | 0.002045 | 0.022304 |
| FAELT B CLL WITH VH3 21 UP                                                | 42  | 0.61095  | 1.815279 | 0.008197 | 0.022718 |
| STEIN ESRRA TARGETS RESPONSIVE TO ESTROGEN UP                             | 29  | 0.545759 | 1.813202 | 0.007619 | 0.023164 |
| KEGG UBIQUITIN MEDIATED PROTEOLYSIS                                       | 130 | 0.44382  | 1.81142  | 0.003868 | 0.023549 |
| REACTOME SIGNALING BY THE B CELL RECEPTOR BCR                             | 121 | 0.466131 | 1.811121 | 0.005894 | 0.023588 |
| ELVIDGE HIF1A AND HIF2A TARGETS UP                                        | 38  | 0.548682 | 1.810792 | 0.009901 | 0.023621 |
| SESTO RESPONSE TO UV C4                                                   | 20  | 0.622422 | 1.810314 | 0.001984 | 0.023691 |
| BRACHAT RESPONSE TO CAMPTOTHECIN DN                                       | 43  | 0.561006 | 1.810142 | 0.012397 | 0.023679 |
| HAHTOLA SEZARY SYNDROM UP                                                 | 92  | 0.460854 | 1.809455 | 0.002028 | 0.023782 |
| LOPEZ TRANSLATION VIA FN1 SIGNALING                                       | 34  | 0.543404 | 1.80931  | 0.013514 | 0.023765 |
| REACTOME ASSOCIATION OF TRIC CCT WITH TARGET PROTEINS DURING BIOSYNTHESIS | 26  | 0.576857 | 1.809084 | 0.007828 | 0.023762 |
| CHIN BREAST CANCER COPY NUMBER UP                                         | 24  | 0.626565 | 1.807274 | 0.011407 | 0.024176 |
| ZHAN EARLY DIFFERENTIATION GENES DN                                       | 42  | 0.538012 | 1.803712 | 0.012048 | 0.024962 |
| SANSOM APC MYC TARGETS                                                    | 198 | 0.414011 | 1.802766 | <0.0001  | 0.025115 |
| RICKMAN TUMOR DIFFERENTIATED MODERATELY VS POORLY DN                      | 15  | 0.720354 | 1.802597 | <0.0001  | 0.02511  |
| REACTOME RNA POL II TRANSCRIPTION PRE INITIATION AND PROMOTER OPENING     | 39  | 0.588001 | 1.802042 | 0.005736 | 0.025206 |
| PID HIF1A PATHWAY                                                         | 16  | 0.622846 | 1.79999  | 0.005792 | 0.025662 |
| MARZEC IL2 SIGNALING UP                                                   | 110 | 0.450741 | 1.799554 | 0.008065 | 0.025712 |
| PARK HSC VS MULTIPOTENT PROGENITORS DN                                    | 18  | 0.59839  | 1.796557 | 0.011673 | 0.026356 |
| COLLIS PRKDC SUBSTRATES                                                   | 19  | 0.649134 | 1.796201 | 0.007692 | 0.026411 |
| REACTOME FORMATION OF RNA POL II ELONGATION COMPLEX                       | 35  | 0.565006 | 1.795503 | 0.003839 | 0.026537 |
| JAZAERI BREAST CANCER BRCA1 VS BRCA2 UP                                   | 47  | 0.52257  | 1.794985 | 0.003976 | 0.026627 |
| BIOCARTA P53HYPOXIA PATHWAY                                               | 22  | 0.562001 | 1.794882 | 0.004107 | 0.026619 |
| ELVIDGE HIF1A TARGETS UP                                                  | 63  | 0.511808 | 1.793423 | 0.01002  | 0.026959 |
| SANSOM APC TARGETS                                                        | 192 | 0.385816 | 1.793128 | <0.0001  | 0.027007 |
| YAGI AML SURVIVAL                                                         | 119 | 0.392796 | 1.793091 | <0.0001  | 0.026971 |
| HOSHIDA LIVER CANCER SUBCLASS S2                                          | 113 | 0.506866 | 1.792142 | 0.007605 | 0.027147 |
| MAYBURD RESPONSE TO L663536 DN                                            | 51  | 0.573153 | 1.78977  | 0.006012 | 0.027691 |
| SMID BREAST CANCER RELAPSE IN BONE DN                                     | 293 | 0.413087 | 1.789521 | <0.0001  | 0.027712 |
| SARTIPY NORMAL AT INSULIN RESISTANCE UP                                   | 33  | 0.563485 | 1.788601 | 0.00813  | 0.027923 |
| MMS MOUSE LYMPH HIGH 4HRS UP                                              | 31  | 0.612652 | 1.78594  | 0.008048 | 0.028548 |
| MCBRYAN PUBERTAL BREAST 6 7WK DN                                          | 76  | 0.454499 | 1.785747 | 0.004008 | 0.028546 |
| MELLMAN TUT1 TARGETS UP                                                   | 18  | 0.620804 | 1.785377 | 0.009747 | 0.028581 |



|                                                                     |     |          |          |          |          |
|---------------------------------------------------------------------|-----|----------|----------|----------|----------|
| BONOME OVARIAN CANCER POOR SURVIVAL DN                              | 20  | 0.615493 | 1.784511 | 0.016    | 0.02876  |
| REACTOME TRANSCRIPTIONAL ACTIVITY OF SMAD2 SMAD3 SMAD4 HETEROTRIMER | 36  | 0.528308 | 1.782822 | 0.009416 | 0.029187 |
| BLUM RESPONSE TO SALIRASIB UP                                       | 236 | 0.449913 | 1.782415 | 0.004057 | 0.02924  |
| PROVENZANI METASTASIS UP                                            | 183 | 0.430626 | 1.781555 | 0.003861 | 0.029432 |
| DING LUNG CANCER EXPRESSION BY COPY NUMBER                          | 96  | 0.545864 | 1.780642 | 0.00996  | 0.029619 |
| KARAKAS TGFB1 SIGNALING                                             | 18  | 0.666887 | 1.78054  | 0.011952 | 0.029588 |
| BLALOCK ALZHEIMERS DISEASE INCIPIENT DN                             | 161 | 0.442609 | 1.77596  | 0.003976 | 0.030702 |
| LIU VMYB TARGETS UP                                                 | 114 | 0.414546 | 1.775587 | <0.0001  | 0.030749 |
| KIM WT1 TARGETS 12HR DN                                             | 200 | 0.420401 | 1.775088 | 0.005859 | 0.030812 |
| ELVIDGE HYPOXIA BY DMOG DN                                          | 54  | 0.470522 | 1.774423 | 0.00198  | 0.030926 |
| HOFMANN CELL LYMPHOMA UP                                            | 46  | 0.496969 | 1.774181 | 0.013861 | 0.030936 |
| PID PRL SIGNALING EVENTS PATHWAY                                    | 23  | 0.577818 | 1.774123 | 0.008081 | 0.030903 |
| BURTON ADIPOGENESIS PEAK AT 8HR                                     | 39  | 0.514567 | 1.773794 | 0.011788 | 0.030946 |
| LEE CALORIE RESTRICTION NEOCORTEX DN                                | 83  | 0.448359 | 1.773617 | 0.004    | 0.030934 |
| WOOD EBV EBNA1 TARGETS UP                                           | 109 | 0.444139 | 1.772703 | 0.007813 | 0.031136 |
| SANA RESPONSE TO IFNG DN                                            | 81  | 0.539717 | 1.770497 | 0.02994  | 0.031672 |
| GRYDER PAX3FOXO1 TOP ENHANCERS                                      | 429 | 0.391805 | 1.769585 | 0.005792 | 0.031878 |
| DOANE RESPONSE TO ANDROGEN DN                                       | 225 | 0.374168 | 1.769289 | 0.004057 | 0.031899 |
| MILI PSEUDOPODIA HAPTOTAXIS UP                                      | 483 | 0.490231 | 1.767013 | 0.035573 | 0.032574 |
| YANG BREAST CANCER ESR1 BULK DN                                     | 22  | 0.600162 | 1.766521 | 0.012097 | 0.032696 |
| MARKS HDAC TARGETS DN                                               | 15  | 0.645989 | 1.764346 | 0.007905 | 0.033314 |
| SENESE HDAC2 TARGETS UP                                             | 107 | 0.510791 | 1.762015 | 0.008    | 0.033954 |
| BERTUCCI MEDULLARY VS DUCTAL BREAST CANCER UP                       | 187 | 0.4786   | 1.759066 | 0.012    | 0.034775 |
| REACTOME METABOLISM OF AMINO ACIDS AND DERIVATIVES                  | 190 | 0.452068 | 1.758336 | 0.003906 | 0.034934 |
| CHOW RASSF1 TARGETS UP                                              | 26  | 0.550912 | 1.756591 | 0.019531 | 0.035417 |
| TIEN INTESTINE PROBIOTICS 6HR DN                                    | 158 | 0.423269 | 1.756531 | 0.005859 | 0.035381 |
| GOTZMANN EPITHELIAL TO MESENCHYMAL TRANSITION UP                    | 68  | 0.502704 | 1.755146 | 0.009728 | 0.035729 |
| GENTILE UV RESPONSE CLUSTER D8                                      | 39  | 0.544286 | 1.754054 | 0.007782 | 0.036011 |
| GAZDA DIAMOND BLACKFAN ANEMIA PROGENITOR DN                         | 62  | 0.500077 | 1.753804 | 0.021359 | 0.036039 |
| KRIGE AMINO ACID DEPRIVATION                                        | 28  | 0.58437  | 1.752743 | 0.00996  | 0.036379 |
| KORKOLA YOLK SAC TUMOR UP                                           | 19  | 0.712506 | 1.751459 | 0.002008 | 0.036778 |
| SMID BREAST CANCER RELAPSE IN LUNG UP                               | 20  | 0.615166 | 1.750559 | 0.014523 | 0.03699  |
| LI DCP2 BOUND MRNA                                                  | 84  | 0.57497  | 1.748359 | 0.024341 | 0.037639 |
| POOLA INVASIVE BREAST CANCER UP                                     | 266 | 0.536473 | 1.747724 | 0.016529 | 0.037801 |
| DITTMER PTHLH TARGETS DN                                            | 72  | 0.45498  | 1.746507 | 0.007634 | 0.03813  |
| GHO ATF5 TARGETS DN                                                 | 16  | 0.666415 | 1.746022 | 0.012048 | 0.03823  |
| KANNAN TP53 TARGETS DN                                              | 21  | 0.567373 | 1.744341 | 0.015296 | 0.038718 |
| KAMMINGA SENESE                                                     | 39  | 0.507797 | 1.744314 | 0.00566  | 0.038664 |
| REACTOME SHC1 EVENTS IN EGFR SIGNALING                              | 15  | 0.637711 | 1.743893 | 0.012    | 0.038756 |
| APPIERTO RESPONSE TO FENRETINIDE DN                                 | 50  | 0.517017 | 1.743279 | 0.01751  | 0.038901 |
| SESTO RESPONSE TO UV C0                                             | 105 | 0.50052  | 1.742575 | 0.018145 | 0.039076 |
| BENPORATH OCT4 TARGETS                                              | 274 | 0.368796 | 1.739931 | 0.001812 | 0.039918 |

|                                                      |     |          |          |          |          |
|------------------------------------------------------|-----|----------|----------|----------|----------|
| LEE LIVER CANCER MYC UP                              | 51  | 0.470873 | 1.739784 | 0.015414 | 0.039899 |
| BRACHAT RESPONSE TO METHOTREXATE DN                  | 26  | 0.582968 | 1.738851 | 0.012685 | 0.040176 |
| SENGUPTA NASOPHARYNGEAL CARCINOMA WITH LMP1 UP       | 375 | 0.426139 | 1.738469 | 0.009653 | 0.040256 |
| GAJATE RESPONSE TO TRABECTEDIN DN                    | 18  | 0.6074   | 1.738387 | 0.020561 | 0.040212 |
| KORKOLA EMBRYONAL CARCINOMA UP                       | 40  | 0.601107 | 1.738059 | 0.016194 | 0.040274 |
| REACTOME ELONGATION ARREST AND RECOVERY              | 24  | 0.572259 | 1.735987 | 0.01006  | 0.040906 |
| REACTOME RNA POL III TRANSCRIPTION                   | 33  | 0.554543 | 1.733553 | 0.013752 | 0.041777 |
| SCHAEFFER PROSTATE DEVELOPMENT 6HR DN                | 482 | 0.383077 | 1.732033 | <0.0001  | 0.042289 |
| LIN MELANOMA COPY NUMBER UP                          | 67  | 0.486542 | 1.730511 | 0.009597 | 0.042759 |
| SATO SILENCED BY METHYLATION IN PANCREATIC CANCER 2  | 44  | 0.474967 | 1.730449 | 0.006135 | 0.042709 |
| QI HYPOXIA TARGETS OF HIF1A AND FOXA2                | 36  | 0.546909 | 1.730327 | 0.021113 | 0.042674 |
| ZHANG PROLIFERATING VS QUIESCENT                     | 49  | 0.525785 | 1.730162 | 0.017893 | 0.042681 |
| GRUETZMANN PANCREATIC CANCER UP                      | 345 | 0.430195 | 1.728057 | 0.021782 | 0.043409 |
| LASTOWSKA NEUROBLASTOMA COPY NUMBER UP               | 163 | 0.480287 | 1.727695 | 0.02729  | 0.04348  |
| FIRESTEIN CTNNB1 PATHWAY                             | 32  | 0.499099 | 1.724517 | 0.011429 | 0.044587 |
| ZHAN MULTIPLE MYELOMA CD2 DN                         | 45  | 0.486427 | 1.722374 | 0.013619 | 0.045327 |
| STANELLE E2F1 TARGETS                                | 27  | 0.511908 | 1.722189 | 0.005941 | 0.045334 |
| KEGG PURINE METABOLISM                               | 152 | 0.402056 | 1.721215 | 0.011952 | 0.045629 |
| YAO TEMPORAL RESPONSE TO PROGESTERONE CLUSTER 17     | 171 | 0.544585 | 1.720928 | 0.038076 | 0.045644 |
| REACTOME SIGNALING BY TGF BETA RECEPTOR COMPLEX      | 60  | 0.466368 | 1.719172 | 0.015209 | 0.046196 |
| BIOCARTA RACCYCD PATHWAY                             | 26  | 0.536303 | 1.718753 | 0.010225 | 0.046271 |
| PID LIS1 PATHWAY                                     | 28  | 0.540751 | 1.718078 | 0.005882 | 0.046432 |
| CHIBA RESPONSE TO TSA DN                             | 22  | 0.61224  | 1.717668 | 0.017544 | 0.046521 |
| SHETH LIVER CANCER VS TXNIP LOSS PAM1                | 221 | 0.376956 | 1.717094 | 0.005988 | 0.046678 |
| REACTOME METABOLISM OF CARBOHYDRATES                 | 228 | 0.384737 | 1.715996 | 0.001942 | 0.047008 |
| BHAT ESR1 TARGETS VIA AKT1 UP                        | 267 | 0.40108  | 1.715448 | 0.005952 | 0.04713  |
| YAO TEMPORAL RESPONSE TO PROGESTERONE CLUSTER 15     | 31  | 0.495448 | 1.714906 | 0.003891 | 0.047255 |
| AMUNDSON GENOTOXIC SIGNATURE                         | 99  | 0.39605  | 1.714298 | 0.003953 | 0.047393 |
| PURBEY TARGETS OF CTBP1 AND SATB1 UP                 | 76  | 0.433125 | 1.713874 | 0.009728 | 0.047484 |
| BYSTRYKH HEMATOPOIESIS STEM CELL AND BRAIN QTL TRANS | 175 | 0.363366 | 1.713847 | 0.00189  | 0.047416 |
| KATSANOUE ELAVL1 TARGETS DN                          | 141 | 0.394473 | 1.712329 | 0.003839 | 0.047959 |
| PANGAS TUMOR SUPPRESSION BY SMAD1 AND SMAD5 DN       | 142 | 0.375644 | 1.712208 | 0.001927 | 0.047945 |
| REACTOME TRANSCRIPTION                               | 188 | 0.532252 | 1.711974 | 0.019646 | 0.047948 |
| HOLLEMAN PREDNISOLONE RESISTANCE B ALL UP            | 22  | 0.618822 | 1.709546 | 0.015625 | 0.048829 |
| FERNANDEZ BOUND BY MYC                               | 179 | 0.387946 | 1.708552 | 0.003922 | 0.049134 |
| SMID BREAST CANCER RELAPSE IN BRAIN UP               | 39  | 0.519588 | 1.708133 | 0.014286 | 0.049214 |
| REACTOME PURINE METABOLISM                           | 33  | 0.523631 | 1.707014 | 0.016632 | 0.049544 |
| ST FAS SIGNALING PATHWAY                             | 63  | 0.423447 | 1.704573 | 0.00969  | 0.05047  |

|                                                    |     |          |          |          |          |
|----------------------------------------------------|-----|----------|----------|----------|----------|
| GENTILE UV RESPONSE CLUSTER D7                     | 36  | 0.481635 | 1.703185 | 0.009862 | 0.050886 |
| BIOCARTA FAS PATHWAY                               | 30  | 0.518229 | 1.702645 | 0.025743 | 0.051055 |
| PARK HSC AND MULTIPOTENT PROGENITORS               | 49  | 0.472364 | 1.700611 | 0.017613 | 0.051796 |
| WANG LMO4 TARGETS DN                               | 326 | 0.403996 | 1.699818 | 0.008    | 0.052053 |
| REACTOME MICRORNA MIRNA BIOGENESIS                 | 18  | 0.599508 | 1.69786  | 0.00996  | 0.052754 |
| REACTOME MRNA CAPPING                              | 28  | 0.571118 | 1.69714  | 0.015656 | 0.052967 |
| DACOSTA UV RESPONSE VIA ERCC3 UP                   | 296 | 0.423056 | 1.697077 | 0.014028 | 0.052918 |
| YIH RESPONSE TO ARSENITE C4                        | 17  | 0.561024 | 1.696625 | 0.011928 | 0.053034 |
| DAZARD RESPONSE TO UV SCC DN                       | 119 | 0.436891 | 1.696215 | 0.014953 | 0.053111 |
| GENTILE UV RESPONSE CLUSTER D1                     | 18  | 0.557752 | 1.69553  | 0.013308 | 0.053341 |
| REACTOME UNFOLDED PROTEIN RESPONSE                 | 72  | 0.462362 | 1.694864 | 0.019724 | 0.053535 |
| RAHMAN TP53 TARGETS PHOSPHORYLATED                 | 21  | 0.683353 | 1.693765 | 0.014085 | 0.053913 |
| KEGG CYSTEINE AND METHIONINE METABOLISM            | 33  | 0.523735 | 1.69293  | 0.012448 | 0.05419  |
| AIYAR COBRA1 TARGETS DN                            | 28  | 0.511169 | 1.689742 | 0.004202 | 0.055541 |
| SCHLOSSER SERUM RESPONSE AUGMENTED BY MYC          | 101 | 0.439698 | 1.689432 | 0.009804 | 0.055586 |
| DAZARD UV RESPONSE CLUSTER G6                      | 142 | 0.489017 | 1.689368 | 0.021113 | 0.055542 |
| STAMBOLSKY BOUND BY MUTATED TP53                   | 17  | 0.56901  | 1.689014 | 0.023211 | 0.05559  |
| CHEOK RESPONSE TO MERCAPTOPYRIMIDINE AND HD MTX DN | 21  | 0.533606 | 1.687393 | 0.004024 | 0.05622  |
| PID FOXO PATHWAY                                   | 49  | 0.473654 | 1.686845 | 0.009416 | 0.056377 |
| PID MTOR 4PATHWAY                                  | 69  | 0.429816 | 1.686695 | 0.005814 | 0.056354 |
| BIOCARTA IGF1MTOR PATHWAY                          | 20  | 0.563866 | 1.68625  | 0.021318 | 0.056472 |
| REACTOME TELOMERE MAINTENANCE                      | 72  | 0.69233  | 1.685215 | 0.021956 | 0.056833 |
| SENESE HDAC3 TARGETS DN                            | 481 | 0.342569 | 1.683217 | 0.001908 | 0.057708 |
| REACTOME PROLONGED ERK ACTIVATION EVENTS           | 19  | 0.538816 | 1.682556 | 0.026585 | 0.057868 |
| PID BETA CATENIN NUC PATHWAY                       | 74  | 0.428941 | 1.68147  | 0.013514 | 0.058237 |
| FLECHNER BIOPSY KIDNEY TRANSPLANT OK VS DONOR DN   | 25  | 0.500504 | 1.680263 | 0.007797 | 0.05867  |
| ZHOU TNF SIGNALING 4HR                             | 52  | 0.494397 | 1.678035 | 0.026263 | 0.059537 |
| NGO MALIGNANT GLIOMA 1P LOH                        | 15  | 0.708102 | 1.673685 | 0.007921 | 0.06137  |
| HU ANGIOGENESIS DN                                 | 36  | 0.573714 | 1.673117 | 0.035644 | 0.06156  |
| REACTOME ACTIVATION OF BH3 ONLY PROTEINS           | 16  | 0.597309 | 1.672686 | 0.021359 | 0.061684 |
| NGUYEN NOTCH1 TARGETS DN                           | 84  | 0.424852 | 1.66808  | 0.00789  | 0.063681 |
| LIAO HAVE SOX4 BINDING SITES                       | 40  | 0.469765 | 1.667305 | 0.020992 | 0.063968 |
| REACTOME ARMS MEDIATED ACTIVATION                  | 17  | 0.54707  | 1.667185 | 0.032258 | 0.06394  |
| REACTOME RNA POL I TRANSCRIPTION TERMINATION       | 19  | 0.620481 | 1.666826 | 0.032075 | 0.064013 |
| MARIADASON RESPONSE TO CURCUMIN SULINDAC 5         | 21  | 0.5335   | 1.665802 | 0.028846 | 0.064369 |
| KEGG PENTOSE PHOSPHATE PATHWAY                     | 25  | 0.570219 | 1.665735 | 0.026749 | 0.064303 |
| AGUIRRE PANCREATIC CANCER COPY NUMBER UP           | 271 | 0.409028 | 1.665732 | 0.02549  | 0.064213 |
| ZHAN V2 LATE DIFFERENTIATION GENES                 | 42  | 0.51556  | 1.665591 | 0.02554  | 0.064194 |
| BAKKER FOXO3 TARGETS DN                            | 168 | 0.364676 | 1.663497 | 0.001992 | 0.065118 |
| REACTOME PYRUVATE METABOLISM                       | 18  | 0.5689   | 1.662712 | 0.019881 | 0.065384 |

|                                                   |     |          |          |          |          |
|---------------------------------------------------|-----|----------|----------|----------|----------|
| JAERVINEN AMPLIFIED IN LARYNGEAL CANCER           | 37  | 0.499937 | 1.659458 | 0.021277 | 0.066918 |
| WANG TUMOR INVASIVENESS DN                        | 200 | 0.374759 | 1.657417 | 0.009747 | 0.067848 |
| CEBALLOS TARGETS OF TP53 AND MYC DN               | 37  | 0.464507 | 1.657214 | 0.010438 | 0.067844 |
| GALE APL WITH FLT3 MUTATED UP                     | 53  | 0.465663 | 1.656576 | 0.013807 | 0.068089 |
| GEISS RESPONSE TO DSRNA DN                        | 15  | 0.585713 | 1.655231 | 0.021195 | 0.068673 |
| KYNG ENVIRONMENTAL STRESS RESPONSE DN             | 19  | 0.533615 | 1.653428 | 0.028056 | 0.069474 |
| LEI MYB TARGETS                                   | 309 | 0.398878 | 1.653195 | 0.017928 | 0.069514 |
| ZHONG RESPONSE TO AZACITIDINE AND TSA DN          | 63  | 0.471926 | 1.652588 | 0.022814 | 0.069717 |
| NAM FXYD5 TARGETS DN                              | 18  | 0.597997 | 1.651976 | 0.034343 | 0.069894 |
| SESTO RESPONSE TO UV C7                           | 65  | 0.477195 | 1.651938 | 0.023438 | 0.069821 |
| REACTOME REGULATORY RNA PATHWAYS                  | 21  | 0.531662 | 1.650779 | 0.019685 | 0.07032  |
| CHEN LUNG CANCER SURVIVAL                         | 26  | 0.568831 | 1.650473 | 0.037109 | 0.070368 |
| REACTOME SIGNALLING TO RAS                        | 27  | 0.507797 | 1.650202 | 0.03     | 0.070403 |
| BORLAK LIVER CANCER EGF UP                        | 55  | 0.452076 | 1.6502   | 0.014228 | 0.070304 |
| BROWNE HCMV INFECTION 18HR UP                     | 171 | 0.396213 | 1.64936  | 0.017143 | 0.070634 |
| MENSE HYPOXIA UP                                  | 93  | 0.450012 | 1.648499 | 0.032922 | 0.070966 |
| KIM WT1 TARGETS 8HR DN                            | 114 | 0.365123 | 1.646874 | 0.003937 | 0.071674 |
| YAO TEMPORAL RESPONSE TO PROGESTERONE CLUSTER 7   | 72  | 0.451079 | 1.646841 | 0.019569 | 0.071588 |
| BURTON ADIPOGENESIS 2                             | 72  | 0.438126 | 1.646385 | 0.029412 | 0.071699 |
| AMUNDSON POOR SURVIVAL AFTER GAMMA RADIATION 2G   | 161 | 0.361826 | 1.646234 | 0.005769 | 0.071669 |
| BURTON ADIPOGENESIS 12                            | 31  | 0.611127 | 1.64571  | 0.028    | 0.071817 |
| BRUINS UVC RESPONSE EARLY LATE                    | 292 | 0.339721 | 1.64524  | 0.003795 | 0.071917 |
| BIOCARTA CASPASE PATHWAY                          | 23  | 0.538726 | 1.64446  | 0.035928 | 0.072236 |
| DARWICHE PAPILOMA RISK LOW UP                     | 149 | 0.398128 | 1.644139 | 0.010288 | 0.072318 |
| POMEROY MEDULLOBLASTOMA DESMOPLASIC VS CLASSIC UP | 58  | 0.407074 | 1.643405 | 0.005837 | 0.072511 |
| CREIGHTON ENDOCRINE THERAPY RESISTANCE 4          | 278 | 0.347047 | 1.642436 | 0.002012 | 0.072976 |
| KUMAR PATHOGEN LOAD BY MACROPHAGES                | 245 | 0.324788 | 1.640057 | 0.001938 | 0.074045 |
| HELLER HDAC TARGETS DN                            | 275 | 0.365715 | 1.64001  | 0.005929 | 0.073962 |
| AMIT SERUM RESPONSE 480 MCF10A                    | 34  | 0.552532 | 1.636711 | 0.033797 | 0.075511 |
| AMUNDSON RESPONSE TO ARSENITE                     | 211 | 0.34884  | 1.63541  | 0.007634 | 0.076051 |
| FLECHNER PBL KIDNEY TRANSPLANT OK VS DONOR UP     | 145 | 0.385983 | 1.634868 | 0.021782 | 0.076204 |
| DEBIASI APOPTOSIS BY REOVIRUS INFECTION UP        | 303 | 0.416946 | 1.634465 | 0.024194 | 0.076303 |
| BIOCARTA MPR PATHWAY                              | 33  | 0.507954 | 1.633851 | 0.026423 | 0.076506 |
| YEGNASUBRAMANIAN PROSTATE CANCER                  | 117 | 0.412479 | 1.633661 | 0.002066 | 0.076502 |
| SMIRNOV RESPONSE TO IR 2HR DN                     | 52  | 0.446206 | 1.63262  | 0.017408 | 0.076967 |
| IVANOVA HEMATOPOIESIS LATE PROGENITOR             | 499 | 0.369651 | 1.632608 | 0.016327 | 0.076869 |
| PID DELTA NP63 PATHWAY                            | 45  | 0.4617   | 1.63256  | 0.023121 | 0.076782 |
| KEGG PANCREATIC CANCER                            | 69  | 0.418428 | 1.632359 | 0.010101 | 0.076793 |
| JACKSON DNMT1 TARGETS UP                          | 74  | 0.436081 | 1.631741 | 0.010204 | 0.077025 |
| FARMER BREAST CANCER APOCRINE VS BASAL            | 316 | 0.35774  | 1.63033  | 0.002053 | 0.077661 |
| FARMER BREAST CANCER CLUSTER 5                    | 18  | 0.675713 | 1.625719 | 0.043977 | 0.080083 |

|                                                                   |     |          |          |          |          |
|-------------------------------------------------------------------|-----|----------|----------|----------|----------|
| KOKKINAKIS METHIONINE DEPRIVATION 48HR UP                         | 124 | 0.390954 | 1.6245   | 0.019305 | 0.080626 |
| KAPOSI LIVER CANCER MET UP                                        | 17  | 0.599186 | 1.623897 | 0.041667 | 0.080847 |
| SENESE HDAC1 TARGETS UP                                           | 425 | 0.403055 | 1.622724 | 0.023301 | 0.081412 |
| LU EZH2 TARGETS DN                                                | 356 | 0.369337 | 1.622484 | 0.011407 | 0.081458 |
| REACTOME ADAPTIVE IMMUNE SYSTEM                                   | 497 | 0.366093 | 1.622    | 0.016194 | 0.081652 |
| DIRMEIER LMP1 RESPONSE LATE UP                                    | 55  | 0.474896 | 1.621838 | 0.038986 | 0.081638 |
| BIOCARTA ACTINY PATHWAY                                           | 20  | 0.580583 | 1.620578 | 0.041502 | 0.082166 |
| ZHENG IL22 SIGNALING DN                                           | 37  | 0.451594 | 1.619909 | 0.015595 | 0.082455 |
| FLECHNER PBL KIDNEY TRANSPLANT REJECTED VS OK UP                  | 62  | 0.4115   | 1.619786 | 0.011881 | 0.082414 |
| MA MYELOID DIFFERENTIATION UP                                     | 38  | 0.460089 | 1.619698 | 0.031189 | 0.082364 |
| KAYO AGING MUSCLE DN                                              | 118 | 0.413931 | 1.618078 | 0.040984 | 0.083196 |
| ZHOU TNF SIGNALING 30MIN                                          | 51  | 0.499099 | 1.615697 | 0.045908 | 0.084461 |
| BIOCARTA CHEMICAL PATHWAY                                         | 22  | 0.502849 | 1.615101 | 0.024742 | 0.08469  |
| DARWICHE PAPILOMA RISK HIGH UP                                    | 136 | 0.391127 | 1.614209 | 0.014    | 0.085031 |
| REACTOME SMAD2 SMAD3 SMAD4 HETEROTRIMER REGULATES TRANSCRIPTION   | 25  | 0.51567  | 1.611986 | 0.019802 | 0.086053 |
| AUNG GASTRIC CANCER                                               | 53  | 0.44126  | 1.611559 | 0.01417  | 0.086187 |
| YAGI AML RELAPSE PROGNOSIS                                        | 34  | 0.490241 | 1.611135 | 0.034816 | 0.086352 |
| JOHNSTONE PARVB TARGETS 2 DN                                      | 315 | 0.422626 | 1.610181 | 0.037182 | 0.086691 |
| KIM MYCL1 AMPLIFICATION TARGETS DN                                | 19  | 0.538227 | 1.606744 | 0.03876  | 0.088531 |
| CHOI ATL STAGE PREDICTOR                                          | 38  | 0.501418 | 1.605912 | 0.048    | 0.088932 |
| VANOEVELEN MYOGENESIS SIN3A TARGETS                               | 209 | 0.355476 | 1.60589  | 0.007648 | 0.088826 |
| RIZ ERYTHROID DIFFERENTIATION HBZ                                 | 40  | 0.452344 | 1.60548  | 0.019841 | 0.088966 |
| HIRSCH CELLULAR TRANSFORMATION SIGNATURE DN                       | 95  | 0.384764 | 1.604487 | 0.011583 | 0.089275 |
| REACTOME DOWNREGULATION OF SMAD2 3 SMAD4 TRANSCRIPTIONAL ACTIVITY | 19  | 0.55709  | 1.603846 | 0.036609 | 0.089289 |
| GOLUB ALL VS AML UP                                               | 24  | 0.539396 | 1.603475 | 0.027668 | 0.089387 |
| DEURIG T CELL PROLYMPHOCYTIC LEUKEMIA UP                          | 340 | 0.334938 | 1.60289  | 0.001988 | 0.089634 |
| LEE TARGETS OF PTCH1 AND SUFU UP                                  | 48  | 0.456557 | 1.602207 | 0.03006  | 0.089917 |
| PID PI3KCI AKT PATHWAY                                            | 35  | 0.486655 | 1.602135 | 0.032323 | 0.089845 |
| SEIDEN ONCOGENESIS BY MET                                         | 84  | 0.503572 | 1.600871 | 0.048387 | 0.090497 |
| BILANGES SERUM SENSITIVE VIA TSC2                                 | 37  | 0.536964 | 1.600165 | 0.047259 | 0.090839 |
| ALCALA APOPTOSIS                                                  | 85  | 0.449618 | 1.597359 | 0.044534 | 0.092377 |
| PID ILK PATHWAY                                                   | 45  | 0.465464 | 1.596905 | 0.032389 | 0.092574 |
| REACTOME SHC MEDIATED SIGNALLING                                  | 15  | 0.566816 | 1.595817 | 0.030426 | 0.0931   |
| BIOCARTA MITOCHONDRIA PATHWAY                                     | 21  | 0.54933  | 1.594292 | 0.031056 | 0.09392  |
| KYNG ENVIRONMENTAL STRESS RESPONSE NOT BY 4NQO IN WS              | 39  | 0.419614 | 1.5942   | 0.015842 | 0.093868 |
| CAIRO HEPATOBLASTOMA POOR SURVIVAL                                | 15  | 0.606056 | 1.59265  | 0.02988  | 0.094675 |
| WANG RESPONSE TO FORSKOLIN UP                                     | 22  | 0.532073 | 1.592173 | 0.033663 | 0.094853 |
| VERHAAK GLIOBLASTOMA PRONEURAL                                    | 167 | 0.44146  | 1.591357 | 0.02621  | 0.095217 |
| BHAT ESR1 TARGETS NOT VIA AKT1 UP                                 | 204 | 0.370554 | 1.589123 | 0.014113 | 0.096474 |
| BAKER HEMATOPOIESIS STAT3 TARGETS                                 | 16  | 0.570944 | 1.588886 | 0.024809 | 0.096491 |
| BENPORATH NOS TARGETS                                             | 167 | 0.359405 | 1.587503 | 0.009225 | 0.097254 |
| HOLLMANN APOPTOSIS VIA CD40 UP                                    | 189 | 0.367514 | 1.586191 | 0.010438 | 0.097944 |

|                                                                       |     |          |          |          |          |
|-----------------------------------------------------------------------|-----|----------|----------|----------|----------|
| REACTOME GRB2 EVENTS IN ERBB2 SIGNALING                               | 22  | 0.503936 | 1.585609 | 0.027833 | 0.098181 |
| REACTOME PYRIMIDINE METABOLISM                                        | 23  | 0.521913 | 1.584481 | 0.037549 | 0.09884  |
| WANG ADIPOGENIC GENES REPRESSED BY SIRT1                              | 26  | 0.548806 | 1.58247  | 0.039526 | 0.100008 |
| BIOCARTA ARF PATHWAY                                                  | 17  | 0.532239 | 1.582089 | 0.049808 | 0.100119 |
| HU GENOTOXIC DAMAGE 24HR                                              | 32  | 0.506298 | 1.581691 | 0.046653 | 0.10025  |
| KYNG DNA DAMAGE BY 4NQO OR UV                                         | 63  | 0.394732 | 1.581533 | 0.009881 | 0.100238 |
| DOANE BREAST CANCER ESR1 DN                                           | 47  | 0.477376 | 1.581199 | 0.028747 | 0.100211 |
| REACTOME SHC RELATED EVENTS                                           | 17  | 0.542609 | 1.580058 | 0.032129 | 0.100837 |
| KRIEG HYPOXIA VIA KDM3A                                               | 50  | 0.470908 | 1.579343 | 0.044807 | 0.101024 |
| WU HBX TARGETS 2 UP                                                   | 22  | 0.516771 | 1.578107 | 0.035433 | 0.101707 |
| RICKMAN TUMOR DIFFERENTIATED MODERATELY VS POORLY UP                  | 114 | 0.379773 | 1.577521 | 0.026369 | 0.101961 |
| REACTOME ABORTIVE ELONGATION OF HIV1 TRANSCRIPT IN THE ABSENCE OF TAT | 19  | 0.575448 | 1.575224 | 0.040816 | 0.103384 |
| MARTORIATI MDM4 TARGETS FETAL LIVER DN                                | 495 | 0.369638 | 1.574268 | 0.020992 | 0.10396  |
| OUYANG PROSTATE CANCER MARKERS                                        | 19  | 0.516968 | 1.574154 | 0.045726 | 0.103916 |
| ZEMBUTSU SENSITIVITY TO METHOTREXATE                                  | 16  | 0.53489  | 1.573963 | 0.024482 | 0.103897 |
| GRESHOCK CANCER COPY NUMBER UP                                        | 313 | 0.360443 | 1.57383  | 0.011561 | 0.103879 |
| SIG PIP3 SIGNALING IN CARDIAC MYOCTES                                 | 66  | 0.400808 | 1.573734 | 0.031873 | 0.103818 |
| KEGG BLADDER CANCER                                                   | 40  | 0.426503 | 1.573104 | 0.015873 | 0.104107 |
| REACTOME SHC1 EVENTS IN ERBB4 SIGNALING                               | 20  | 0.510957 | 1.57302  | 0.022901 | 0.104028 |
| GROSS HIF1A TARGETS DN                                                | 23  | 0.552367 | 1.572917 | 0.039749 | 0.103973 |
| WEI MIR34A TARGETS                                                    | 141 | 0.366197 | 1.572348 | 0.022901 | 0.104227 |
| TAKAO RESPONSE TO UVB RADIATION DN                                    | 95  | 0.416768 | 1.571543 | 0.036329 | 0.104627 |
| HOLLEMAN PREDNISOLONE RESISTANCE ALL UP                               | 19  | 0.56107  | 1.570808 | 0.046748 | 0.104985 |
| KYNG WERNER SYNDROM AND NORMAL AGING UP                               | 87  | 0.375606 | 1.568077 | 0.009728 | 0.106292 |
| JIANG AGING CEREBRAL CORTEX DN                                        | 53  | 0.438811 | 1.565642 | 0.031185 | 0.107457 |
| CEBALLOS TARGETS OF TP53 AND MYC UP                                   | 21  | 0.508984 | 1.564147 | 0.027184 | 0.107872 |
| SEMENZA HIF1 TARGETS                                                  | 35  | 0.524358 | 1.563799 | 0.04829  | 0.10799  |
| SWEET KRAS TARGETS DN                                                 | 61  | 0.412861 | 1.563619 | 0.020534 | 0.107964 |
| BOYALT LIVER CANCER SUBCLASS G2                                       | 27  | 0.47087  | 1.56339  | 0.027027 | 0.108013 |
| REACTOME RNA POL III TRANSCRIPTION INITIATION FROM TYPE 2 PROMOTER    | 23  | 0.539026 | 1.563213 | 0.047525 | 0.108015 |
| KYNG RESPONSE TO H2O2 VIA ERCC6 DN                                    | 44  | 0.441741 | 1.561874 | 0.037624 | 0.108848 |
| JACKSON DNMT1 TARGETS DN                                              | 24  | 0.545188 | 1.561622 | 0.039033 | 0.10889  |
| STONER ESOPHAGEAL CARCINOGENESIS UP                                   | 36  | 0.457234 | 1.561434 | 0.04817  | 0.108752 |
| SMITH LIVER CANCER                                                    | 43  | 0.498756 | 1.561043 | 0.041152 | 0.108909 |
| SANSOM WNT PATHWAY REQUIRE MYC                                        | 57  | 0.422715 | 1.560403 | 0.028846 | 0.109191 |
| MOOHA GLUCONEOGENESIS                                                 | 31  | 0.496544 | 1.558225 | 0.041916 | 0.110478 |
| CHENG IMPRINTED BY ESTRADIOL                                          | 100 | 0.361582 | 1.557951 | 0.014463 | 0.110533 |
| GARGALOVIC RESPONSE TO OXIDIZED PHOSPHOLIPIDS GREEN DN                | 22  | 0.499176 | 1.551441 | 0.023576 | 0.114696 |
| TERAO AOX4 TARGETS SKIN UP                                            | 35  | 0.451873 | 1.550985 | 0.028112 | 0.114862 |
| BROWNE HCMV INFECTION 24HR UP                                         | 139 | 0.352274 | 1.550466 | 0.014493 | 0.115131 |
| REACTOME MHC CLASS II ANTIGEN PRESENTATION                            | 87  | 0.39917  | 1.549929 | 0.037773 | 0.115366 |

|                                                    |     |          |          |          |          |
|----------------------------------------------------|-----|----------|----------|----------|----------|
| SHETH LIVER CANCER VS TXNIP LOSS PAM3              | 67  | 0.403894 | 1.549401 | 0.027613 | 0.115624 |
| SHIPP DLBCL CURED VS FATAL DN                      | 42  | 0.407602 | 1.547219 | 0.015905 | 0.11693  |
| ROESSLER LIVER CANCER METASTASIS UP                | 102 | 0.35375  | 1.546567 | 0.00616  | 0.116987 |
| JIANG HYPOXIA CANCER                               | 76  | 0.434074 | 1.545477 | 0.042    | 0.117314 |
| SHETH LIVER CANCER VS TXNIP LOSS PAM2              | 144 | 0.34491  | 1.539279 | 0.032454 | 0.121628 |
| HOFFMANN IMMATURE TO MATURE B LYMPHOCYTE DN        | 50  | 0.433968 | 1.539225 | 0.036017 | 0.121518 |
| PID NOTCH PATHWAY                                  | 58  | 0.408909 | 1.538972 | 0.017241 | 0.121559 |
| GALLUZZI PERMEABILIZE MITOCHONDRIA                 | 43  | 0.427044 | 1.538971 | 0.038536 | 0.121418 |
| PID ATF2 PATHWAY                                   | 58  | 0.410909 | 1.53888  | 0.026316 | 0.121342 |
| NOUZOVA TRETINOIN AND H4 ACETYLATION               | 130 | 0.3784   | 1.53758  | 0.031128 | 0.122224 |
| CHNG MULTIPLE MYELOMA HYPERPLOID DN                | 28  | 0.529976 | 1.535975 | 0.049485 | 0.123068 |
| PID LKB1 PATHWAY                                   | 46  | 0.418381 | 1.535684 | 0.044316 | 0.12314  |
| MARTIN INTERACT WITH HDAC                          | 43  | 0.410289 | 1.533477 | 0.026365 | 0.12449  |
| WEST ADRENOCORTICAL CARCINOMA VS ADENOMA UP        | 18  | 0.515806 | 1.531735 | 0.049213 | 0.125589 |
| KOYAMA SEMA3B TARGETS DN                           | 370 | 0.314341 | 1.531156 | 0.005882 | 0.125873 |
| HAHTOLA MYCOSIS FUNGOIDES CD4 DN                   | 109 | 0.386874 | 1.531013 | 0.044574 | 0.125692 |
| BECKER TAMOXIFEN RESISTANCE DN                     | 50  | 0.430428 | 1.53085  | 0.028846 | 0.125657 |
| RICKMAN TUMOR DIFFERENTIATED WELL VS MODERATELY DN | 107 | 0.466784 | 1.52963  | 0.047817 | 0.126294 |
| BAE BRCA1 TARGETS DN                               | 32  | 0.433241 | 1.528747 | 0.042308 | 0.126765 |
| DACOSTA UV RESPONSE VIA ERCC3 COMMON UP            | 70  | 0.387219 | 1.5286   | 0.029528 | 0.126712 |
| FLECHNER PBL KIDNEY TRANSPLANT REJECTED VS OK DN   | 50  | 0.417441 | 1.527244 | 0.035225 | 0.127564 |
| BIOCARTA CARM ER PATHWAY                           | 35  | 0.442014 | 1.526328 | 0.030948 | 0.127953 |
| PURBEY TARGETS OF CTBP1 AND SATB1 DN               | 174 | 0.328326 | 1.525377 | 0.01006  | 0.12847  |
| FORTSCHEGGER PHF8 TARGETS UP                       | 248 | 0.335887 | 1.523701 | 0.026923 | 0.129436 |
| WINTER HYPOXIA METAGENE                            | 229 | 0.381003 | 1.522935 | 0.045082 | 0.129756 |
| REACTOME SIGNALLING TO ERKS                        | 35  | 0.431755 | 1.521357 | 0.038618 | 0.130815 |
| CHEN HOXA5 TARGETS 9HR DN                          | 36  | 0.448273 | 1.520952 | 0.048733 | 0.130995 |
| IWANAGA CARCINOGENESIS BY KRAS PTEN UP             | 163 | 0.329468 | 1.519181 | 0.011494 | 0.131768 |
| MULLIGHAN NPM1 MUTATED SIGNATURE 2 UP              | 127 | 0.356497 | 1.519016 | 0.028112 | 0.131765 |
| PID CDC42 PATHWAY                                  | 69  | 0.400509 | 1.514054 | 0.045276 | 0.134319 |
| BIOCARTA VEGF PATHWAY                              | 29  | 0.458892 | 1.512633 | 0.036965 | 0.134938 |
| KUNINGER IGF1 VS PDGFB TARGETS DN                  | 43  | 0.432276 | 1.510486 | 0.046784 | 0.136213 |
| PID HDAC CLASSI PATHWAY                            | 65  | 0.392029 | 1.508864 | 0.032381 | 0.13671  |
| TSAI RESPONSE TO IONIZING RADIATION                | 144 | 0.364818 | 1.505166 | 0.046784 | 0.13902  |
| YANG BREAST CANCER ESR1 DN                         | 24  | 0.472833 | 1.504519 | 0.031873 | 0.13937  |
| LINSLEY MIR16 TARGETS                              | 190 | 0.341199 | 1.503248 | 0.045098 | 0.139914 |
| SHEPARD BMYB MORPHOLINO UP                         | 201 | 0.331275 | 1.501624 | 0.012024 | 0.140947 |
| REACTOME BASIGIN INTERACTIONS                      | 24  | 0.479126 | 1.501503 | 0.037182 | 0.140895 |
| OUILLETTE CLL 13Q14 DELETION UP                    | 69  | 0.395825 | 1.500209 | 0.033962 | 0.141724 |
| QI HYPOXIA                                         | 136 | 0.356963 | 1.4983   | 0.03252  | 0.14278  |
| JIANG TIP30 TARGETS UP                             | 44  | 0.424957 | 1.495697 | 0.048356 | 0.144561 |
| GRAESSMANN RESPONSE TO MC AND SERUM DEPRIVATION DN | 78  | 0.363386 | 1.493716 | 0.018036 | 0.145737 |
| YOSHIMURA MAPK8 TARGETS DN                         | 350 | 0.324904 | 1.484714 | 0.014028 | 0.151977 |

|                                                    |     |          |          |          |          |
|----------------------------------------------------|-----|----------|----------|----------|----------|
| POS HISTAMINE RESPONSE NETWORK                     | 32  | 0.442072 | 1.48223  | 0.042802 | 0.153474 |
| PID CASPASE PATHWAY                                | 51  | 0.384227 | 1.47734  | 0.043651 | 0.156388 |
| HOFFMANN SMALL PRE BII TO IMMATURE B LYMPHOCYTE DN | 45  | 0.372562 | 1.473417 | 0.041502 | 0.158456 |
| HOFFMANN PRE BI TO LARGE PRE BII LYMPHOCYTE UP     | 35  | 0.396877 | 1.472927 | 0.039761 | 0.158727 |
| PID P53 DOWNSTREAM PATHWAY                         | 133 | 0.334232 | 1.466732 | 0.042169 | 0.162927 |
| WANG CLIM2 TARGETS UP                              | 217 | 0.315482 | 1.465924 | 0.028195 | 0.163489 |
| DARWICHE SKIN TUMOR PROMOTER UP                    | 127 | 0.349238 | 1.456778 | 0.040161 | 0.168139 |
| STAMBOLSKY TARGETS OF MUTATED TP53 UP              | 46  | 0.400182 | 1.455109 | 0.048638 | 0.168721 |
| MULLIGHAN NPM1 SIGNATURE 3 UP                      | 311 | 0.296923 | 1.453482 | 0.028958 | 0.170023 |
| LIU COMMON CANCER GENES                            | 67  | 0.362628 | 1.452871 | 0.046729 | 0.170426 |
| ROSS AML OF FAB M7 TYPE                            | 64  | 0.373503 | 1.451377 | 0.036437 | 0.171608 |
| GRYDER PAX3FOXO1 ENHANCERS KO DOWN                 | 426 | 0.320877 | 1.451109 | 0.046296 | 0.171667 |
| RIZKI TUMOR INVASIVENESS 3D DN                     | 259 | 0.297978 | 1.450605 | 0.009785 | 0.171602 |
| RAO BOUND BY SALL4 ISOFORM B                       | 480 | 0.299963 | 1.44362  | 0.032692 | 0.177022 |
| PENG LEUCINE DEPRIVATION UP                        | 134 | 0.322544 | 1.437752 | 0.035225 | 0.181856 |
| GARY CD5 TARGETS UP                                | 444 | 0.29384  | 1.436339 | 0.034836 | 0.182804 |
| BROWNE HCMV INFECTION 30MIN DN                     | 136 | 0.317756 | 1.43474  | 0.027397 | 0.18395  |
| WANG LMO4 TARGETS UP                               | 330 | 0.302702 | 1.432158 | 0.042636 | 0.185472 |
| BILANGES SERUM SENSITIVE GENES                     | 86  | 0.32838  | 1.417551 | 0.045635 | 0.196246 |
| FIGUEROA AML METHYLATION CLUSTER 4 UP              | 97  | 0.316713 | 1.411657 | 0.037849 | 0.201317 |
| KYNG WERNER SYNDROM AND NORMAL AGING DN            | 211 | 0.295641 | 1.404526 | 0.018036 | 0.207186 |
| LEE CALORIE RESTRICTION NEOCORTEX UP               | 81  | 0.333622 | 1.400835 | 0.039216 | 0.209193 |
| BROWNE HCMV INFECTION 20HR UP                      | 230 | 0.303127 | 1.391798 | 0.043393 | 0.215266 |
| OKUMURA INFLAMMATORY RESPONSE LPS                  | 171 | 0.304923 | 1.387206 | 0.035088 | 0.217712 |
| BROWNE HCMV INFECTION 1HR DN                       | 208 | 0.277264 | 1.386098 | 0.013861 | 0.218114 |
| TANAKA METHYLATED IN ESOPHAGEAL CARCINOMA          | 97  | 0.332809 | 1.376805 | 0.04023  | 0.223842 |
| BROWNE HCMV INFECTION 4HR DN                       | 241 | 0.270784 | 1.374737 | 0.027944 | 0.225098 |

ES, enrichment score; NES, normalized enrichment score; FDR, false discovery rate; GSEA, gene set enrichment analysis; KIF, kinesin.
